# Supplementary material for: Ikaros Regulates microRNA Networks in Acute Lymphoblastic Leukemia
Source: Preprints.org preprint supplement (doi:10.20944/preprints202208.0323.v1), 2022-08-17
Supplement: Supplementary file 1 [file TableS1.xlsx]

## Sheet: Table S1
Table S1: miRNA expression values in B-ALL cells
transcript_id_array_design	probeset_id	probe_set_name	accession	mxp5_con_rep1	mxp5_ik1_rep1	mxp5_con_rep2	mxp5_ik1_rep2	pdx2_con_rep1	pdx2_ik1_rep1	pdx2_con_rep2	pdx2_ik1_rep2	alignments	sequence_length	sequence
hsa-let-7a-5p	20500112	MIMAT0000062_st	MIMAT0000062	10.5991	10.9473	11.556	9.69176	10.2528	10.2737	10.4469	10.684	chr11:122017276-122017297 (-) /// chr22:46508632-46508653 (+) /// chr9:96938244-96938265 (+)	22	UGAGGUAGUAGGUUGUAUAGUU
hsa-let-7b-5p	20500115	MIMAT0000063_st	MIMAT0000063	4.8656	5.3306	5.27227	3.29543	11.3497	11.4296	11.2672	11.7585	chr22:46509571-46509592 (+)	22	UGAGGUAGUAGGUUGUGUGGUU
hsa-let-7b-3p	20500116	MIMAT0004482_st	MIMAT0004482	0.136177	0.59585	1.02004	0	1.68202	0.970018	0	0.487731	chr22:46509625-46509646 (+)	22	CUAUACAACCUACUGCCUUCCC
hsa-let-7c-5p	20500117	MIMAT0000064_st	MIMAT0000064	5.52992	5.40528	6.88063	4.42084	10.0947	10.115	10.0205	10.5358	chr21:17912158-17912179 (+)	22	UGAGGUAGUAGGUUGUAUGGUU
hsa-let-7d-5p	20500119	MIMAT0000065_st	MIMAT0000065	11.4278	11.6081	11.7165	10.3408	10.9433	10.9638	10.9271	11.2354	chr9:96941123-96941144 (+)	22	AGAGGUAGUAGGUUGCAUAGUU
hsa-let-7d-3p	20500120	MIMAT0004484_st	MIMAT0004484	4.72617	4.59485	5.61132	3.85136	4.5517	4.5822	2.99904	4.71228	chr9:96941177-96941198 (+)	22	CUAUACGACCUGCUGCCUUUCU
hsa-let-7e-5p	20500121	MIMAT0000066_st	MIMAT0000066	2.76265	2.19014	3.75072	1.63978	2.36433	1.03768	2.83155	1.88592	chr19:52196046-52196067 (+)	22	UGAGGUAGGAGGUUGUAUAGUU
hsa-let-7f-5p	20500123	MIMAT0000067_st	MIMAT0000067	7.53144	7.38102	9.08848	6.23734	6.19128	5.77535	6.58471	7.02563	chr9:96938635-96938656 (+) /// chrX:53584207-53584228 (-)	22	UGAGGUAGUAGAUUGUAUAGUU
hsa-let-7f-1-3p	20500124	MIMAT0004486_st	MIMAT0004486	0.763377	0.45255	0.75079	0	1.34559	1.04129	1.59559	0	chr9:96938691-96938712 (+)	22	CUAUACAAUCUAUUGCCUUCCC
hsa-miR-15a-5p	20500126	MIMAT0000068_st	MIMAT0000068	5.30064	5.74017	6.48536	4.8474	5.91608	6.02679	5.91788	5.88383	chr13:50623303-50623324 (-)	22	UAGCAGCACAUAAUGGUUUGUG
hsa-miR-15a-3p	20500127	MIMAT0004488_st	MIMAT0004488	0	1.82076	0	0	1.18414	1.39958	1.60879	0	chr13:50623266-50623287 (-)	22	CAGGCCAUAUUGUGCUGCCUCA
hsa-miR-16-5p	20500128	MIMAT0000069_st	MIMAT0000069	11.1474	11.6679	11.5443	10.5409	11.1051	11.2853	10.9046	11.2426	chr13:50623163-50623184 (-) /// chr3:160122542-160122563 (+)	22	UAGCAGCACGUAAAUAUUGGCG
hsa-miR-16-1-3p	20500129	MIMAT0004489_st	MIMAT0004489	1.32397	2.32304	0.8591	0	0	0.890878	3.24338	1.21739	chr13:50623121-50623142 (-)	22	CCAGUAUUAACUGUGCUGCUGA
hsa-miR-17-5p	20500130	MIMAT0000070_st	MIMAT0000070	12.6838	12.7623	12.4755	11.5207	12.3702	12.613	12.3773	12.4329	chr13:92002872-92002894 (+)	23	CAAAGUGCUUACAGUGCAGGUAG
hsa-miR-17-3p	20500131	MIMAT0000071_st	MIMAT0000071	5.8957	5.69751	6.09248	4.81864	5.39251	5.41348	5.55191	4.85583	chr13:92002909-92002930 (+)	22	ACUGCAGUGAAGGCACUUGUAG
hsa-miR-18a-5p	20500132	MIMAT0000072_st	MIMAT0000072	8.81626	8.66143	8.55834	7.42611	8.49061	8.4697	8.83608	7.94273	chr13:92003010-92003032 (+)	23	UAAGGUGCAUCUAGUGCAGAUAG
hsa-miR-18a-3p	20500133	MIMAT0002891_st	MIMAT0002891	5.48522	5.31098	5.66161	4.16095	5.80842	5.32305	5.5791	4.9721	chr13:92003051-92003073 (+)	23	ACUGCCCUAAGUGCUCCUUCUGG
hsa-miR-19a-3p	20500135	MIMAT0000073_st	MIMAT0000073	1.15713	1.23876	2.82335	2.10098	1.52217	1.0748	2.31456	1.00262	chr13:92003193-92003215 (+)	23	UGUGCAAAUCUAUGCAAAACUGA
hsa-miR-19b-3p	20500137	MIMAT0000074_st	MIMAT0000074	8.84268	7.90895	9.06882	7.87015	8.28907	8.55099	7.74687	7.48674	chr13:92003499-92003521 (+) /// chrX:133303713-133303735 (-)	23	UGUGCAAAUCCAUGCAAAACUGA
hsa-miR-20a-5p	20500139	MIMAT0000075_st	MIMAT0000075	12.0775	12.0045	12.2316	10.9455	11.5198	11.7544	11.5024	11.5312	chr13:92003326-92003348 (+)	23	UAAAGUGCUUAUAGUGCAGGUAG
hsa-miR-21-5p	20500141	MIMAT0000076_st	MIMAT0000076	2.41701	0.17341	3.90183	2.10032	0	0.266768	2.83092	0.271451	chr17:57918634-57918655 (+)	22	UAGCUUAUCAGACUGAUGUUGA
hsa-miR-21-3p	20500142	MIMAT0004494_st	MIMAT0004494	0.720147	0.34392	0.31314	1.79247	0	0	0.748366	0.535101	chr17:57918672-57918692 (+)	21	CAACACCAGUCGAUGGGCUGU
hsa-miR-22-3p	20500144	MIMAT0000077_st	MIMAT0000077	2.2439	3.48968	3.64392	3.4863	0	3.22779	0	1.37374	chr17:1617208-1617229 (-)	22	AAGCUGCCAGUUGAAGAACUGU
hsa-miR-23a-5p	20500145	MIMAT0004496_st	MIMAT0004496	4.89559	5.64049	4.99089	4.53215	3.3629	2.4526	2.63874	0.626511	chr19:13947444-13947465 (-)	22	GGGGUUCCUGGGGAUGGGAUUU
hsa-miR-23a-3p	20500146	MIMAT0000078_st	MIMAT0000078	10.857	11.3132	11.3822	10.2602	9.91659	9.73465	9.70265	9.76543	chr19:13947409-13947429 (-)	21	AUCACAUUGCCAGGGAUUUCC
hsa-miR-24-3p	20500148	MIMAT0000080_st	MIMAT0000080	10.1874	10.7927	10.1712	9.49492	9.01908	9.10981	8.99283	8.76584	chr19:13947103-13947124 (-) /// chr9:97848346-97848367 (+)	22	UGGCUCAGUUCAGCAGGAACAG
hsa-miR-24-2-5p	20500149	MIMAT0004497_st	MIMAT0004497	0.937737	1.06396	0	2.88335	0	0.508428	0	0	chr19:13947140-13947161 (-)	22	UGCCUACUGAGCUGAAACACAG
hsa-miR-25-5p	20500150	MIMAT0004498_st	MIMAT0004498	6.76682	6.46632	6.77268	5.39113	6.29147	5.97916	6.34027	6.26379	chr7:99691233-99691253 (-)	21	AGGCGGAGACUUGGGCAAUUG
hsa-miR-25-3p	20500151	MIMAT0000081_st	MIMAT0000081	9.01857	9.18487	10.0042	8.36877	9.26039	8.99633	9.07491	9.21269	chr7:99691194-99691215 (-)	22	CAUUGCACUUGUCUCGGUCUGA
hsa-miR-26a-5p	20500152	MIMAT0000082_st	MIMAT0000082	11.9868	12.1799	12.1411	11.1679	11.5398	11.6084	11.3976	11.6319	chr12:58218441-58218462 (-) /// chr3:38010904-38010925 (+)	22	UUCAAGUAAUCCAGGAUAGGCU
hsa-miR-26b-5p	20500154	MIMAT0000083_st	MIMAT0000083	2.44378	1.11406	2.85275	1.41735	1.57579	0	1.64117	0.372561	chr2:219267380-219267400 (+)	21	UUCAAGUAAUUCAGGAUAGGU
hsa-miR-27a-5p	20500156	MIMAT0004501_st	MIMAT0004501	2.68409	4.47384	2.86561	2.31535	1.75945	1.4294	1.75168	0	chr19:13947301-13947322 (-)	22	AGGGCUUAGCUGCUUGUGAGCA
hsa-miR-27a-3p	20500157	MIMAT0000084_st	MIMAT0000084	7.47007	7.77173	7.83451	6.9232	6.20292	6.0436	5.3469	5.14624	chr19:13947261-13947281 (-)	21	UUCACAGUGGCUAAGUUCCGC
hsa-miR-28-5p	20500158	MIMAT0000085_st	MIMAT0000085	8.24793	8.51429	8.23856	7.17504	7.2587	7.39491	7.47914	7.12842	chr3:188406582-188406603 (+)	22	AAGGAGCUCACAGUCUAUUGAG
hsa-miR-28-3p	20500159	MIMAT0004502_st	MIMAT0004502	7.12761	7.71487	8.02038	6.63118	6.70108	6.71717	6.66094	6.57996	chr3:188406622-188406643 (+)	22	CACUAGAUUGUGAGCUCCUGGA
hsa-miR-29a-3p	20500161	MIMAT0000086_st	MIMAT0000086	7.7099	7.65554	8.73385	7.01283	7.37796	7.08925	6.54204	6.69343	chr7:130561507-130561528 (-)	22	UAGCACCAUCUGAAAUCGGUUA
hsa-miR-30a-5p	20500162	MIMAT0000087_st	MIMAT0000087	2.32176	3.03425	3.7162	2.98407	2.45514	3.12491	2.45325	2.09285	chr6:72113298-72113319 (-)	22	UGUAAACAUCCUCGACUGGAAG
hsa-miR-32-3p	20500167	MIMAT0004505_st	MIMAT0004505	0	1.23198	0.83491	0	0	0.264908	2.42449	1.14897	chr9:111808511-111808532 (-)	22	CAAUUUAGUGUGUGUGAUAUUU
hsa-miR-33a-3p	20500169	MIMAT0004506_st	MIMAT0004506	0	0.12497	0.95047	1.18481	0	0	0.573216	0.135131	chr22:42296993-42297014 (+)	22	CAAUGUUUCCACAGUGCAUCAC
hsa-miR-92a-1-5p	20500170	MIMAT0004507_st	MIMAT0004507	7.7181	6.05488	7.62497	4.74293	6.76987	6.37915	6.42913	6.33128	chr13:92003578-92003600 (+)	23	AGGUUGGGAUCGGUUGCAAUGCU
hsa-miR-92a-3p	20500171	MIMAT0000092_st	MIMAT0000092	13.2316	13.2253	13.3807	11.9687	12.94	13.0063	12.818	13.2569	chr13:92003615-92003636 (+) /// chrX:133303574-133303595 (-)	22	UAUUGCACUUGUCCCGGCCUGU
hsa-miR-92a-2-5p	20500172	MIMAT0004508_st	MIMAT0004508	2.84777	3.29069	3.50156	2.47584	4.63839	4.70666	4.19846	4.9815	chrX:133303613-133303634 (-)	22	GGGUGGGGAUUUGUUGCAUUAC
hsa-miR-93-5p	20500173	MIMAT0000093_st	MIMAT0000093	11.1303	11.4984	10.9336	10.3338	10.9131	11.0303	10.9522	10.8438	chr7:99691438-99691460 (-)	23	CAAAGUGCUGUUCGUGCAGGUAG
hsa-miR-93-3p	20500174	MIMAT0004509_st	MIMAT0004509	6.27277	6.7083	6.44043	5.73252	6.64867	6.66412	6.50808	6.13935	chr7:99691400-99691421 (-)	22	ACUGCUGAGCUAGCACUUCCCG
hsa-miR-98-5p	20500179	MIMAT0000096_st	MIMAT0000096	0	0	1.5423	0	2.10648	0.831828	2.20091	0.787011	chrX:53583260-53583281 (-)	22	UGAGGUAGUAAGUUGUAUUGUU
hsa-miR-99a-5p	20500181	MIMAT0000097_st	MIMAT0000097	0	0	0	0	1.49558	0.439408	0.846056	0.951001	chr21:17911421-17911442 (+)	22	AACCCGUAGAUCCGAUCUUGUG
hsa-miR-101-5p	20500185	MIMAT0004513_st	MIMAT0004513	2.36677	3.59215	3.53983	2.2695	3.59371	3.60383	3.44464	3.92035	chr1:65524160-65524181 (-)	22	CAGUUAUCACAGUGCUGAUGCU
hsa-miR-29b-1-5p	20500187	MIMAT0004514_st	MIMAT0004514	3.99513	4.12542	4.79239	1.85403	3.58847	3.50668	4.08119	3.69832	chr7:130562266-130562289 (-)	24	GCUGGUUUCAUAUGGUGGUUUAGA
hsa-miR-29b-2-5p	20500189	MIMAT0004515_st	MIMAT0004515	0	2.1316	1.1768	0.938732	1.84683	2.27023	3.97296	1.83649	chr1:207975837-207975858 (-)	22	CUGGUUUCACAUGGUGGCUUAG
hsa-miR-103a-2-5p	20500190	MIMAT0009196_st	MIMAT0009196	0.418127	0.95153	0.99082	0	1.27165	0.433208	1.74946	0.653791	chr20:3898151-3898173 (+)	23	AGCUUCUUUACAGUGCUGCCUUG
hsa-miR-103a-3p	20500191	MIMAT0000101_st	MIMAT0000101	11.58	11.9263	11.5274	10.6891	11.2201	11.2985	11.5158	11.2335	chr20:3898188-3898210 (+) /// chr5:167987909-167987931 (-)	23	AGCAGCAUUGUACAGGGCUAUGA
hsa-miR-106a-5p	20500194	MIMAT0000103_st	MIMAT0000103	12.5595	12.6554	12.4162	11.4374	12.2698	12.4993	12.2925	12.3634	chrX:133304274-133304296 (-)	23	AAAAGUGCUUACAGUGCAGGUAG
hsa-miR-107	20500196	MIMAT0000104_st	MIMAT0000104	11.0469	11.4787	11.2839	10.3202	10.818	10.8206	11.0555	10.7885	chr10:91352513-91352535 (-)	23	AGCAGCAUUGUACAGGGCUAUCA
hsa-miR-16-2-3p	20500197	MIMAT0004518_st	MIMAT0004518	1.31999	1.92083	1.66031	1.15095	2.17835	0.843498	1.90457	1.65899	chr3:160122585-160122606 (+)	22	CCAAUAUUACUGUGCUGCUUUA
hsa-miR-192-5p	20500385	MIMAT0000222_st	MIMAT0000222	4.01877	5.3766	4.41236	4.87436	3.10621	2.41977	2.85777	2.15891	chr11:64658675-64658695 (-)	21	CUGACCUAUGAAUUGACAGCC
hsa-miR-197-5p	20500394	MIMAT0022691_st	MIMAT0022691	3.75787	4.80805	4.60566	4.51064	3.52819	4.11848	4.84322	5.12805	chr1:110141523-110141545 (+)	23	CGGGUAGAGAGGGCAGUGGGAGG
hsa-miR-197-3p	20500395	MIMAT0000227_st	MIMAT0000227	7.05034	7.71811	7.99064	6.52858	7.33246	7.34644	6.8737	7.74469	chr1:110141562-110141583 (+)	22	UUCACCACCUUCUCCACCCAGC
hsa-miR-199a-3p	20500400	MIMAT0000232_st	MIMAT0000232	3.66955	3.69965	4.3074	3.01141	1.12254	0.464098	1.61623	0.772511	chr1:172113694-172113715 (-) /// chr19:10928105-10928126 (-)	22	ACAGUAGUCUGCACAUUGGUUA
hsa-miR-129-5p	20500418	MIMAT0000242_st	MIMAT0000242	0.261217	2.90349	1.90668	2.06674	0	1.26859	3.35193	0.514481	chr11:43602958-43602978 (+) /// chr7:127847929-127847949 (+)	21	CUUUUUGCGGUCUGGGCUUGC
hsa-miR-30c-5p	20500422	MIMAT0000244_st	MIMAT0000244	8.22605	8.57124	9.22962	8.09798	8.04601	8.15921	7.52277	8.01596	chr1:41222972-41222994 (+) /// chr6:72086706-72086728 (-)	23	UGUAAACAUCCUACACUCUCAGC
hsa-miR-30d-5p	20500424	MIMAT0000245_st	MIMAT0000245	7.52888	8.06063	7.8842	7.04285	7.54613	7.81652	7.28567	7.11254	chr8:135817162-135817183 (-)	22	UGUAAACAUCCCCGACUGGAAG
hsa-miR-7-1-3p	20500436	MIMAT0004553_st	MIMAT0004553	1.23931	1.26211	2.91609	2.55364	1.67096	0	0.720546	0	chr9:86584686-86584707 (-)	22	CAACAAAUCACAGUCUGCCAUA
hsa-miR-34a-5p	20500442	MIMAT0000255_st	MIMAT0000255	7.49421	6.73889	8.04802	5.61094	3.34183	3.73645	1.57379	1.05246	chr1:9211794-9211815 (-)	22	UGGCAGUGUCUUAGCUGGUUGU
hsa-miR-34a-3p	20500443	MIMAT0004557_st	MIMAT0004557	2.56887	0	2.91631	1.73355	0	0	0	0	chr1:9211752-9211773 (-)	22	CAAUCAGCAAGUAUACUGCCCU
hsa-miR-181a-5p	20500444	MIMAT0000256_st	MIMAT0000256	12.3756	12.6104	12.3044	11.6382	11.5538	11.9005	11.4278	11.7768	chr1:198828237-198828259 (-) /// chr9:127454759-127454781 (+)	23	AACAUUCAACGCUGUCGGUGAGU
hsa-miR-181a-2-3p	20500445	MIMAT0004558_st	MIMAT0004558	7.97677	7.81485	7.71279	6.84577	5.49552	5.60489	5.60618	5.55189	chr9:127454797-127454818 (+)	22	ACCACUGACCGUUGACUGUACC
hsa-miR-181b-5p	20500446	MIMAT0000257_st	MIMAT0000257	11.62	12.1824	11.7748	11.0413	11.0793	11.2865	10.8431	11.3415	chr1:198828054-198828076 (-) /// chr9:127456004-127456026 (+)	23	AACAUUCAUUGCUGUCGGUGGGU
hsa-miR-181c-5p	20500448	MIMAT0000258_st	MIMAT0000258	6.54226	7.03873	6.45533	6.65856	5.67056	6.12521	4.84335	5.63012	chr19:13985539-13985560 (+)	22	AACAUUCAACCUGUCGGUGAGU
hsa-miR-187-5p	20500454	MIMAT0004561_st	MIMAT0004561	1.12368	2.50552	0	2.82817	0	2.44756	0	0	chr18:33484834-33484855 (-)	22	GGCUACAACACAGGACCCGGGC
hsa-miR-199b-3p	20500458	MIMAT0004563_st	MIMAT0004563	3.66955	3.69965	4.3074	3.01141	1.12254	0.464098	1.61623	0.772511	chr9:131007024-131007045 (-)	22	ACAGUAGUCUGCACAUUGGUUA
hsa-miR-210-5p	20500464	MIMAT0026475_st	MIMAT0026475	2.55775	2.61186	0	3.37676	1.57569	2.81372	2.5496	1.09581	chr11:568150-568171 (-)	22	AGCCCCUGCCCACCGCACACUG
hsa-miR-210-3p	20500465	MIMAT0000267_st	MIMAT0000267	5.33747	7.07257	5.83267	6.20335	6.38498	6.37385	6.29734	6.09053	chr11:568112-568133 (-)	22	CUGUGCGUGUGACAGCGGCUGA
hsa-miR-212-5p	20500468	MIMAT0022695_st	MIMAT0022695	0.826817	0.67826	1.09403	0	0.859468	0.540648	1.11259	0.600161	chr17:1953622-1953644 (-)	23	ACCUUGGCUCUAGACUGCUUACU
hsa-miR-212-3p	20500469	MIMAT0000269_st	MIMAT0000269	2.22468	4.05789	2.30882	2.83429	3.07964	2.65026	3.64044	2.141	chr17:1953584-1953604 (-)	21	UAACAGUCUCCAGUCACGGCC
hsa-miR-181a-3p	20500470	MIMAT0000270_st	MIMAT0000270	5.711	5.50605	5.52936	4.75795	4.04319	5.09689	3.11664	4.6085	chr1:198828198-198828219 (-)	22	ACCAUCGACCGUUGAUUGUACC
hsa-miR-218-5p	20500478	MIMAT0000275_st	MIMAT0000275	1.13407	0	3.83415	0.973352	0	0	0	0	chr4:20529922-20529942 (+) /// chr5:168195216-168195236 (-)	21	UUGUGCUUGAUCUAACCAUGU
hsa-miR-221-5p	20500483	MIMAT0004568_st	MIMAT0004568	0	1.02538	1.3609	0	1.73312	2.13462	1.14328	1.15852	chrX:45605649-45605670 (-)	22	ACCUGGCAUACAAUGUAGAUUU
hsa-miR-221-3p	20500484	MIMAT0000278_st	MIMAT0000278	9.82983	10.5005	10.4846	9.50198	10.8652	11.2616	10.8422	11.3372	chrX:45605608-45605630 (-)	23	AGCUACAUUGUCUGCUGGGUUUC
hsa-miR-222-5p	20500485	MIMAT0004569_st	MIMAT0004569	0	0	1.43347	0	4.1725	4.01407	4.54533	3.78065	chrX:45606479-45606500 (-)	22	CUCAGUAGCCAGUGUAGAUCCU
hsa-miR-222-3p	20500486	MIMAT0000279_st	MIMAT0000279	10.0318	10.896	10.7112	10.0134	11.4133	11.6772	11.2555	11.8579	chrX:45606442-45606462 (-)	21	AGCUACAUCUGGCUACUGGGU
hsa-miR-223-3p	20500488	MIMAT0000280_st	MIMAT0000280	1.10292	1.74622	2.77265	1.16146	1.26996	1.18789	1.49934	0.817421	chrX:65238779-65238800 (+)	22	UGUCAGUUUGUCAAAUACCCCA
hsa-let-7g-5p	20500713	MIMAT0000414_st	MIMAT0000414	7.86684	7.9814	9.16465	6.97137	7.18064	7.36417	7.50294	7.9711	chr3:52302352-52302373 (-)	22	UGAGGUAGUAGUUUGUACAGUU
hsa-let-7i-5p	20500715	MIMAT0000415_st	MIMAT0000415	8.29038	8.8358	9.44169	7.68984	8.50415	8.72096	8.91633	9.30028	chr12:62997471-62997492 (+)	22	UGAGGUAGUAGUUUGUGCUGUU
hsa-miR-15b-5p	20500718	MIMAT0000417_st	MIMAT0000417	10.3316	10.6496	10.9867	9.54338	9.5572	9.86455	9.83178	10.2467	chr3:160122395-160122416 (+)	22	UAGCAGCACAUCAUGGUUUACA
hsa-miR-23b-5p	20500720	MIMAT0004587_st	MIMAT0004587	0.444417	1.02097	1.3705	0	0	0	0.783766	0.653801	chr9:97847509-97847530 (+)	22	UGGGUUCCUGGCAUGCUGAUUU
hsa-miR-23b-3p	20500721	MIMAT0000418_st	MIMAT0000418	9.2647	9.69209	9.65244	8.57862	7.99931	7.90516	7.85809	8.04829	chr9:97847547-97847567 (+)	21	AUCACAUUGCCAGGGAUUACC
hsa-miR-27b-5p	20500722	MIMAT0004588_st	MIMAT0004588	2.69776	2.7069	2.78377	1.95493	1.02219	1.9193	3.49976	1.11899	chr9:97847745-97847766 (+)	22	AGAGCUUAGCUGAUUGGUGAAC
hsa-miR-27b-3p	20500723	MIMAT0000419_st	MIMAT0000419	5.80793	5.94085	6.64313	5.23714	4.56822	4.70914	4.27622	3.75247	chr9:97847787-97847807 (+)	21	UUCACAGUGGCUAAGUUCUGC
hsa-miR-30b-5p	20500724	MIMAT0000420_st	MIMAT0000420	5.95981	6.26786	7.40681	5.96744	6.31469	5.74011	5.72661	5.81869	chr8:135812813-135812834 (-)	22	UGUAAACAUCCUACACUCAGCU
hsa-miR-30b-3p	20500725	MIMAT0004589_st	MIMAT0004589	4.57091	5.27665	4.61715	3.72383	4.63087	4.59872	4.88003	4.37751	chr8:135812775-135812796 (-)	22	CUGGGAGGUGGAUGUUUACUUC
hsa-miR-125b-5p	20500730	MIMAT0000423_st	MIMAT0000423	0	0	0	0	1.57579	3.50208	1.20596	1.49835	chr11:121970517-121970538 (-) /// chr21:17962573-17962594 (+)	22	UCCCUGAGACCCUAACUUGUGA
hsa-miR-128-1-5p	20500732	MIMAT0026477_st	MIMAT0026477	0.689227	0	2.18941	1.84783	2.39499	0	2.97277	2.20144	chr2:136422981-136423003 (+)	23	CGGGGCCGUAGCACUGUCUGAGA
hsa-miR-128-3p	20500733	MIMAT0000424_st	MIMAT0000424	7.80174	7.2493	8.55296	6.37771	7.80175	7.8181	7.72071	8.12641	chr2:136423016-136423036 (+) /// chr3:35786019-35786039 (+)	21	UCACAGUGAACCGGUCUCUUU
hsa-miR-130a-3p	20500735	MIMAT0000425_st	MIMAT0000425	0.912727	1.32948	1.5825	2.44619	4.13232	4.50587	4.23407	4.16168	chr11:57408725-57408746 (+)	22	CAGUGCAAUGUUAAAAGGGCAU
hsa-miR-132-3p	20500737	MIMAT0000426_st	MIMAT0000426	1.23539	1.8474	1.98107	1.83651	2.52251	1.31301	2.78187	0.484701	chr17:1953223-1953244 (-)	22	UAACAGUCUACAGCCAUGGUCG
hsa-miR-135a-3p	20500741	MIMAT0004595_st	MIMAT0004595	0	0.66492	1.13524	2.27609	0	0	0.960626	0.563601	chr3:52328248-52328269 (-)	22	UAUAGGGAUUGGAGCCGUGGCG
hsa-miR-140-5p	20500745	MIMAT0000431_st	MIMAT0000431	1.00245	1.3886	3.88136	1.67635	1.67028	0.877308	1.2656	0	chr16:69967006-69967027 (+)	22	CAGUGGUUUUACCCUAUGGUAG
hsa-miR-140-3p	20500746	MIMAT0004597_st	MIMAT0004597	8.72333	9.16516	8.7075	7.70353	7.41234	7.79207	7.77915	7.32857	chr16:69967045-69967065 (+)	21	UACCACAGGGUAGAACCACGG
hsa-miR-152-3p	20500758	MIMAT0000438_st	MIMAT0000438	0.583277	1.37587	1.29505	2.02942	0	0	0	0	chr17:46114540-46114560 (-)	21	UCAGUGCAUGACAGAACUUGG
hsa-miR-191-5p	20500761	MIMAT0000440_st	MIMAT0000440	12.5189	12.7598	12.426	11.5057	12.0076	12.2081	12.0056	12.2743	chr3:49058105-49058127 (-)	23	CAACGGAAUCCCAAAAGCAGCUG
hsa-miR-191-3p	20500762	MIMAT0001618_st	MIMAT0001618	0.812857	2.10759	3.19207	0	2.26279	2.99126	2.0786	1.761	chr3:49058064-49058085 (-)	22	GCUGCGCUUGGAUUUCGUCCCC
hsa-miR-126-3p	20500769	MIMAT0000445_st	MIMAT0000445	7.21466	8.22922	8.16705	7.77436	8.25911	7.84968	7.70299	7.68928	chr9:139565105-139565126 (+)	22	UCGUACCGUGAGUAAUAAUGCG
hsa-miR-127-3p	20500771	MIMAT0000446_st	MIMAT0000446	2.18528	4.55344	0	2.67024	1.3552	2.28823	3.48635	0.707821	chr14:101349372-101349393 (+)	22	UCGGAUCCGUCUGAGCUUGGCU
hsa-miR-138-1-3p	20500777	MIMAT0004607_st	MIMAT0004607	2.65	2.35785	2.6395	3.39225	1.04053	1.95928	2.36832	1.40911	chr3:44155766-44155787 (+)	22	GCUACUUCACAACACCAGGGCC
hsa-miR-146a-5p	20500778	MIMAT0000449_st	MIMAT0000449	9.89449	10.5862	10.7329	9.62129	8.76866	8.99736	9.01345	9.36449	chr5:159912379-159912400 (+)	22	UGAGAACUGAAUUCCAUGGGUU
hsa-miR-149-3p	20500781	MIMAT0004609_st	MIMAT0004609	4.81825	6.42149	6.59478	5.88259	5.5502	6.16318	5.4647	5.76298	chr2:241395473-241395493 (+)	21	AGGGAGGGACGGGGGCUGUGC
hsa-miR-150-5p	20500782	MIMAT0000451_st	MIMAT0000451	7.83515	9.86988	8.2323	8.68424	6.25409	7.92552	5.67981	8.01163	chr19:50004089-50004110 (-)	22	UCUCCCAACCCUUGUACCAGUG
hsa-miR-150-3p	20500783	MIMAT0004610_st	MIMAT0004610	1.55209	5.12794	2.1508	4.18814	0	2.61008	0	2.41883	chr19:50004054-50004075 (-)	22	CUGGUACAGGCCUGGGGGACAG
hsa-miR-185-5p	20500787	MIMAT0000455_st	MIMAT0000455	9.50545	9.85614	9.41162	8.63052	9.60682	9.72586	9.83312	9.72913	chr22:20020676-20020697 (+)	22	UGGAGAGAAAGGCAGUUCCUGA
hsa-miR-185-3p	20500788	MIMAT0004611_st	MIMAT0004611	1.98717	4.4953	6.41441	3.51469	3.39192	3.53387	4.16438	4.02382	chr22:20020711-20020732 (+)	22	AGGGGCUGGCUUUCCUCUGGUC
hsa-miR-188-5p	20500791	MIMAT0000457_st	MIMAT0000457	2.25745	4.44026	2.93705	3.70397	3.03986	3.17042	4.46419	3.16594	chrX:49768123-49768143 (+)	21	CAUCCCUUGCAUGGUGGAGGG
hsa-miR-193a-5p	20500795	MIMAT0004614_st	MIMAT0004614	9.22631	9.58671	9.3043	8.31976	7.08008	6.50262	6.58521	6.48713	chr17:29887035-29887056 (+)	22	UGGGUCUUUGCGGGCGAGAUGA
hsa-miR-193a-3p	20500796	MIMAT0000459_st	MIMAT0000459	2.24981	1.74302	2.74479	1.831	0.746138	0.306518	0	0	chr17:29887069-29887090 (+)	22	AACUGGCCUACAAAGUCCCAGU
hsa-miR-194-5p	20500797	MIMAT0000460_st	MIMAT0000460	4.37038	5.62342	4.52921	5.13401	3.40589	3.81749	3.87829	3.22269	chr1:220291548-220291569 (-) /// chr11:64658876-64658897 (-)	22	UGUAACAGCAACUCCAUGUGGA
hsa-miR-195-5p	20500798	MIMAT0000461_st	MIMAT0000461	5.79815	4.91531	6.26325	4.1016	4.85403	6.02516	5.04349	5.71367	chr17:6920986-6921006 (-)	21	UAGCAGCACAGAAAUAUUGGC
hsa-miR-195-3p	20500799	MIMAT0004615_st	MIMAT0004615	4.04519	5.18449	4.53524	2.81967	2.33336	3.73068	5.42934	4.22702	chr17:6920947-6920968 (-)	22	CCAAUAUUGGCUGUGCUGCUCC
hsa-miR-206	20500800	MIMAT0000462_st	MIMAT0000462	2.50843	4.32251	2.01106	2.10961	2.41635	2.15838	5.06962	2.90989	chr6:52009199-52009220 (+)	22	UGGAAUGUAAGGAAGUGUGUGG
hsa-miR-320a	20500848	MIMAT0000510_st	MIMAT0000510	11.1613	11.1472	11.0153	10.0207	10.094	9.96768	9.9085	9.7393	chr8:22102488-22102509 (-)	22	AAAAGCUGGGUUGAGAGGGCGA
hsa-miR-200c-3p	20501036	MIMAT0000617_st	MIMAT0000617	5.47064	6.61612	5.54658	5.61489	5.09474	4.96337	5.0312	4.78183	chr12:7072905-7072927 (+)	23	UAAUACUGCCGGGUAAUGAUGGA
hsa-miR-155-5p	20501083	MIMAT0000646_st	MIMAT0000646	7.65483	7.13409	7.69762	6.86293	7.55842	7.23456	7.27997	7.53136	chr21:26946295-26946317 (+)	23	UUAAUGCUAAUCGUGAUAGGGGU
hsa-miR-128-2-5p	20501147	MIMAT0031095_st	MIMAT0031095	2.26724	0	3.86954	0	3.01227	2.81151	3.25561	3.25832	chr3:35785982-35786004 (+)	23	GGGGGCCGAUACACUGUACGAGA
hsa-miR-194-3p	20501155	MIMAT0004671_st	MIMAT0004671	0	0.0437403	1.84744	0	0	0	0.979486	0.695321	chr11:64658840-64658861 (-)	22	CCAGUGGGGCUGCUGUUAUCUG
hsa-miR-106b-5p	20501157	MIMAT0000680_st	MIMAT0000680	9.95687	10.3525	9.95108	8.97641	9.94169	10.2385	9.5889	9.74268	chr7:99691666-99691686 (-)	21	UAAAGUGCUGACAGUGCAGAU
hsa-miR-106b-3p	20501158	MIMAT0004672_st	MIMAT0004672	7.76279	7.69689	7.47693	6.80645	7.62859	7.58061	7.55943	7.5908	chr7:99691625-99691646 (-)	22	CCGCACUGUGGGUACUUGCUGC
hsa-miR-29c-5p	20501159	MIMAT0004673_st	MIMAT0004673	0	0	0	0	1.48709	1.0818	3.49422	0	chr1:207975248-207975269 (-)	22	UGACCGAUUUCUCCUGGUGUUC
hsa-miR-29c-3p	20501160	MIMAT0000681_st	MIMAT0000681	0	0	0.59611	0.503672	1.35717	0	0	0	chr1:207975210-207975231 (-)	22	UAGCACCAUUUGAAAUCGGUUA
hsa-miR-30c-1-3p	20501161	MIMAT0004674_st	MIMAT0004674	2.08532	2.75192	1.80527	1.64392	2.68451	1.94163	2.04267	1.23227	chr1:41223011-41223032 (+)	22	CUGGGAGAGGGUUGUUUACUCC
hsa-miR-200a-5p	20501162	MIMAT0001620_st	MIMAT0001620	0.748627	0	0	1.50454	0	0	0.946586	0	chr1:1103258-1103279 (+)	22	CAUCUUACCGGACAGUGCUGGA
hsa-miR-34b-3p	20501169	MIMAT0004676_st	MIMAT0004676	0	0.78962	0.51167	0	0	0.994358	1.21035	0	chr11:111383712-111383733 (+)	22	CAAUCACUAACUCCACUGCCAU
hsa-miR-34c-3p	20501171	MIMAT0004677_st	MIMAT0004677	0.924147	0.9871	3.2516	2.98353	0	0	2.14594	0	chr11:111384209-111384230 (+)	22	AAUCACUAACCACACGGCCAGG
hsa-miR-99b-3p	20501177	MIMAT0004678_st	MIMAT0004678	0.803117	3.29098	2.16667	0	0	0	3.45039	1.30286	chr19:52195909-52195930 (+)	22	CAAGCUCGUGUCUGUGGGUCCG
hsa-miR-296-3p	20501179	MIMAT0004679_st	MIMAT0004679	1.56978	2.98448	4.1776	2.68966	2.39775	1.77427	4.10412	3.14685	chr20:57392681-57392702 (-)	22	GAGGGUUGGGUGGAGGCUCUCC
hsa-miR-130b-5p	20501180	MIMAT0004680_st	MIMAT0004680	1.38866	1.07101	3.5236	0	1.42677	0.681948	2.47478	1.11056	chr22:22007605-22007625 (+)	21	ACUCUUUCCCUGUUGCACUAC
hsa-miR-130b-3p	20501181	MIMAT0000691_st	MIMAT0000691	10.7599	11.0876	10.5661	9.53505	10.2797	10.6106	10.7541	10.4009	chr22:22007643-22007664 (+)	22	CAGUGCAAUGAUGAAAGGGCAU
hsa-miR-30e-5p	20501182	MIMAT0000692_st	MIMAT0000692	3.06062	2.84045	3.08714	1.7646	1.85431	2.3346	1.26244	1.30303	chr1:41220043-41220064 (+)	22	UGUAAACAUCCUUGACUGGAAG
hsa-miR-30e-3p	20501183	MIMAT0000693_st	MIMAT0000693	3.51606	3.09824	4.8335	3.40083	3.2127	2.71201	1.01802	2.29831	chr1:41220085-41220106 (+)	22	CUUUCAGUCGGAUGUUUACAGC
hsa-miR-361-5p	20501197	MIMAT0000703_st	MIMAT0000703	10.4717	10.5313	10.3099	9.19988	10.0101	10.3385	9.97291	10.45	chrX:85158686-85158707 (-)	22	UUAUCAGAAUCUCCAGGGGUAC
hsa-miR-361-3p	20501198	MIMAT0004682_st	MIMAT0004682	0	0.99183	1.95568	0	1.22184	1.44206	2.18556	0	chrX:85158646-85158668 (-)	23	UCCCCCAGGUGUGAUUCUGAUUU
hsa-miR-362-5p	20501201	MIMAT0000705_st	MIMAT0000705	4.92978	5.09914	4.98089	4.09668	3.10329	3.62726	3.51361	2.49123	chrX:49773576-49773599 (+)	24	AAUCCUUGGAACCUAGGUGUGAGU
hsa-miR-363-5p	20501205	MIMAT0003385_st	MIMAT0003385	5.09242	5.30471	5.15908	4.31159	5.59038	6.17776	5.81734	6.28041	chrX:133303455-133303476 (-)	22	CGGGUGGAUCACGAUGCAAUUU
hsa-miR-363-3p	20501206	MIMAT0000707_st	MIMAT0000707	7.4116	7.85743	8.52033	7.35892	8.63898	8.67217	8.2562	8.47005	chrX:133303412-133303433 (-)	22	AAUUGCACGGUAUCCAUCUGUA
hsa-miR-365a-5p	20501209	MIMAT0009199_st	MIMAT0009199	0	1.66118	0.77908	2.3519	0	0.712488	2.98422	0	chr16:14403157-14403179 (+)	23	AGGGACUUUUGGGGGCAGAUGUG
hsa-miR-365b-5p	20501213	MIMAT0022833_st	MIMAT0022833	2.91867	2.75289	4.00976	2.64817	2.18433	0.638238	1.78377	0.480371	chr17:29902458-29902479 (+)	22	AGGGACUUUCAGGGGCAGCUGU
hsa-miR-371a-5p	20501229	MIMAT0004687_st	MIMAT0004687	0	1.05224	0	2.39815	0	0	1.28178	0	chr19:54290934-54290953 (+)	20	ACUCAAACUGUGGGGGCACU
hsa-miR-378a-5p	20501242	MIMAT0000731_st	MIMAT0000731	4.23731	4.94294	3.97424	4.00902	4.4651	4.01549	4.01793	3.47842	chr5:149112392-149112413 (+)	22	CUCCUGACUCCAGGUCCUGUGU
hsa-miR-378a-3p	20501243	MIMAT0000732_st	MIMAT0000732	9.75716	10.3556	9.43002	8.93561	9.25429	9.488	9.50855	8.99962	chr5:149112430-149112450 (+)	22	ACUGGACUUGGAGUCAGAAGGC
hsa-miR-382-5p	20501250	MIMAT0000737_st	MIMAT0000737	0.522147	1.77242	0.84226	0	0	0	1.4606	0	chr14:101520653-101520674 (+)	22	GAAGUUGUUCGUGGUGGAUUCG
hsa-miR-383-5p	20501252	MIMAT0000738_st	MIMAT0000738	0	0.18337	0.6852	1.72477	0	0.126148	0.881016	0	chr8:14710992-14711013 (-)	22	AGAUCAGAAGGUGAUUGUGGCU
hsa-miR-330-3p	20501276	MIMAT0000751_st	MIMAT0000751	4.21846	3.51032	3.8422	3.79379	4.84513	4.60572	5.59906	4.50973	chr19:46142267-46142289 (-)	23	GCAAAGCACACGGCCUGCAGAGA
hsa-miR-328-5p	20501277	MIMAT0026486_st	MIMAT0026486	5.24738	6.3662	6.75741	5.71558	5.09904	6.19075	5.91121	6.25441	chr16:67236270-67236292 (-)	23	GGGGGGGCAGGAGGGGCUCAGGG
hsa-miR-328-3p	20501278	MIMAT0000752_st	MIMAT0000752	2.8861	2.23809	3.53002	0	4.35879	3.78607	3.39918	4.05057	chr16:67236230-67236251 (-)	22	CUGGCCCUCUCUGCCCUUCCGU
hsa-miR-342-5p	20501279	MIMAT0004694_st	MIMAT0004694	5.1574	6.28338	6.11257	5.55993	5.42156	5.53	5.18511	5.64858	chr14:100576010-100576030 (+)	21	AGGGGUGCUAUCUGUGAUUGA
hsa-miR-342-3p	20501280	MIMAT0000753_st	MIMAT0000753	11.1016	11.6495	11.0597	10.5915	10.4975	10.8822	10.3453	10.9691	chr14:100576052-100576074 (+)	23	UCUCACACAGAAAUCGCACCCGU
hsa-miR-337-3p	20501282	MIMAT0000754_st	MIMAT0000754	0	0.63897	0.0585697	0	0.898658	0	0.503546	0.316291	chr14:101340890-101340911 (+)	22	CUCCUAUAUGAUGCCUUUCUUC
hsa-miR-151a-5p	20501286	MIMAT0004697_st	MIMAT0004697	10.0846	10.3846	10.2796	9.12881	10.3091	10.454	10.2308	10.5512	chr8:141742722-141742742 (-)	21	UCGAGGAGCUCACAGUCUAGU
hsa-miR-151a-3p	20501287	MIMAT0000757_st	MIMAT0000757	7.23931	7.78674	7.73465	6.77399	8.06111	8.32833	8.1023	8.16612	chr8:141742686-141742706 (-)	21	CUAGACUGAAGCUCCUUGAGG
hsa-miR-148b-3p	20501291	MIMAT0000759_st	MIMAT0000759	0.558607	1.37832	2.36984	1.74416	3.09785	1.77059	2.62468	0.0227515	chr12:54731062-54731083 (+)	22	UCAGUGCAUCACAGAACUUUGU
hsa-miR-331-5p	20501292	MIMAT0004700_st	MIMAT0004700	2.094	3.65086	3.16392	2.52355	2.31726	2.78332	3.49976	1.81177	chr12:95702221-95702242 (+)	22	CUAGGUAUGGUCCCAGGGAUCC
hsa-miR-331-3p	20501293	MIMAT0000760_st	MIMAT0000760	3.02971	4.32696	4.39774	3.5828	4.37914	3.97851	4.36143	3.85914	chr12:95702256-95702276 (+)	21	GCCCCUGGGCCUAUCCUAGAA
hsa-miR-324-5p	20501294	MIMAT0000761_st	MIMAT0000761	3.86278	4.1254	3.95602	3.58119	4.26471	4.21574	4.9851	3.47384	chr17:7126661-7126683 (-)	23	CGCAUCCCCUAGGGCAUUGGUGU
hsa-miR-324-3p	20501295	MIMAT0000762_st	MIMAT0000762	5.96326	6.71858	6.23609	5.40158	5.98243	6.28886	6.3499	5.79779	chr17:7126627-7126646 (-)	20	ACUGCCCCAGGUGCUGCUGG
hsa-miR-338-5p	20501296	MIMAT0004701_st	MIMAT0004701	3.43406	4.32168	3.54758	2.50489	1.8727	2.9612	4.39076	2.30551	chr17:79099723-79099744 (-)	22	AACAAUAUCCUGGUGCUGAGUG
hsa-miR-339-5p	20501298	MIMAT0000764_st	MIMAT0000764	5.16072	5.4925	4.88886	4.67458	5.30732	5.45453	5.28049	5.34558	chr7:1062626-1062648 (-)	23	UCCCUGUCCUCCAGGAGCUCACG
hsa-miR-339-3p	20501299	MIMAT0004702_st	MIMAT0004702	4.74351	4.99358	4.20634	4.06137	4.96355	4.84219	5.04079	4.71307	chr7:1062591-1062613 (-)	23	UGAGCGCCUCGACGACAGAGCCG
hsa-miR-325	20501311	MIMAT0000771_st	MIMAT0000771	0	0.99178	0.97983	0	0.727598	0.513648	1.65425	0.529551	chrX:76225889-76225911 (-)	23	CCUAGUAGGUGUCCAGUAAGUGU
hsa-miR-345-5p	20501312	MIMAT0000772_st	MIMAT0000772	6.17852	2.04933	6.12007	0	7.15385	7.29401	7.27016	7.23154	chr14:100774213-100774234 (+)	22	GCUGACUCCUAGUCCAGGGCUC
hsa-miR-346	20501314	MIMAT0000773_st	MIMAT0000773	3.15279	3.63246	3.37489	0	0	2.78382	3.43608	1.73899	chr10:88024504-88024526 (-)	23	UGUCUGCCCGCAUGCCUGCCUCU
hsa-miR-422a	20502122	MIMAT0001339_st	MIMAT0001339	6.55996	7.38511	7.0882	6.39233	6.64597	6.68898	6.13052	5.80951	chr15:64163188-64163209 (-)	22	ACUGGACUUAGGGUCAGAAGGC
hsa-miR-423-5p	20502123	MIMAT0004748_st	MIMAT0004748	7.55213	8.02723	7.54908	7.16744	7.52668	7.67434	7.08522	7.40143	chr17:28444113-28444135 (+)	23	UGAGGGGCAGAGAGCGAGACUUU
hsa-miR-423-3p	20502124	MIMAT0001340_st	MIMAT0001340	8.34279	8.78328	8.89922	7.73329	8.53134	8.3893	8.11388	8.34982	chr17:28444149-28444171 (+)	23	AGCUCGGUCUGAGGCCCCUCAGU
hsa-miR-425-5p	20502129	MIMAT0003393_st	MIMAT0003393	9.86239	10.4573	10.155	9.5475	9.95605	9.99441	9.59804	9.77521	chr3:49057632-49057654 (-)	23	AAUGACACGAUCACUCCCGUUGA
hsa-miR-425-3p	20502130	MIMAT0001343_st	MIMAT0001343	5.2248	5.6705	5.73064	4.9321	5.48945	5.56123	5.46562	5.18396	chr3:49057592-49057613 (-)	22	AUCGGGAAUGUCGUGUCCGCCC
hsa-miR-18b-5p	20502235	MIMAT0001412_st	MIMAT0001412	5.56997	5.67337	5.8435	4.76918	5.50738	5.66709	5.77296	5.3847	chrX:133304114-133304136 (-)	23	UAAGGUGCAUCUAGUGCAGUUAG
hsa-miR-20b-5p	20502237	MIMAT0001413_st	MIMAT0001413	10.9811	11.4524	10.9798	10.3423	11.1439	11.5243	11.2516	11.1821	chrX:133303880-133303902 (-)	23	CAAAGUGCUCAUAGUGCAGGUAG
hsa-miR-20b-3p	20502238	MIMAT0004752_st	MIMAT0004752	5.21296	5.58135	5.3835	4.78322	5.68818	6.03065	5.81907	5.91647	chrX:133303843-133303864 (-)	22	ACUGUAGUAUGGGCACUUCCAG
hsa-miR-483-5p	20503100	MIMAT0004761_st	MIMAT0004761	0	0.63935	1.8265	3.5233	0	0.246038	1.29974	0.707411	chr11:2155411-2155432 (-)	22	AAGACGGGAGGAAAGAAGGGAG
hsa-miR-484	20503102	MIMAT0002174_st	MIMAT0002174	4.78467	6.00938	6.33144	4.89341	5.79334	5.55129	5.4285	5.42845	chr16:15737158-15737179 (+)	22	UCAGGCUCAGUCCCCUCCCGAU
hsa-miR-486-5p	20503105	MIMAT0002177_st	MIMAT0002177	5.05445	3.46637	5.42455	3.25071	2.53017	0	1.41356	0	chr8:41518002-41518023 (-)	22	UCCUGUACUGAGCUGCCCCGAG
hsa-miR-486-3p	20503106	MIMAT0004762_st	MIMAT0004762	4.02182	1.32874	4.09699	2.60792	0	0	0	0	chr8:41517961-41517981 (-)	21	CGGGGCAGCUCAGUACAGGAU
hsa-miR-146b-5p	20503793	MIMAT0002809_st	MIMAT0002809	7.01065	7.72626	8.328	6.9119	6.73813	6.86013	6.83046	7.10889	chr10:104196277-104196298 (+)	22	UGAGAACUGAAUUCCAUAGGCU
hsa-miR-146b-3p	20503794	MIMAT0004766_st	MIMAT0004766	2.37337	2.61139	3.23713	0	2.26795	1.8109	1.69446	0	chr10:104196313-104196334 (+)	22	UGCCCUGUGGACUCAGUUCUGG
hsa-miR-202-3p	20503796	MIMAT0002811_st	MIMAT0002811	0.933367	1.52477	1.31587	1.95825	0	0.560078	0.560746	0.515681	chr10:135061042-135061061 (-)	20	AGAGGUAUAGGGCAUGGGAA
hsa-miR-494-3p	20503803	MIMAT0002816_st	MIMAT0002816	4.03831	3.46767	3.64078	3.49104	3.17282	2.18888	3.81154	0.697871	chr14:101496018-101496039 (+)	22	UGAAACAUACACGGGAAACCUC
hsa-miR-193b-5p	20503807	MIMAT0004767_st	MIMAT0004767	2.67242	3.35463	3.0937	3.18223	2.04356	0.740048	1.92092	0.344171	chr16:14397837-14397858 (+)	22	CGGGGUUUUGAGGGCGAGAUGA
hsa-miR-193b-3p	20503808	MIMAT0002819_st	MIMAT0002819	4.89859	5.1632	6.10437	4.58742	4.21999	4.39892	4.81532	4.86855	chr16:14397874-14397895 (+)	22	AACUGGCCCUCAAAGUCCCGCU
hsa-miR-181d-5p	20503811	MIMAT0002821_st	MIMAT0002821	5.05999	5.83164	5.95896	4.72066	4.95991	4.99089	4.806	4.7277	chr19:13985724-13985746 (+)	23	AACAUUCAUUGUUGUCGGUGGGU
hsa-miR-512-3p	20503814	MIMAT0002823_st	MIMAT0002823	0.915657	0.90799	0.9416	0	0	0	1.24738	0	chr19:54169983-54170004 (+) /// chr19:54172467-54172488 (+)	22	AAGUGCUGUCAUAGCUGAGGUC
hsa-miR-500a-5p	20503875	MIMAT0004773_st	MIMAT0004773	4.19195	4.54472	4.06582	3.36682	3.02914	1.96833	2.63215	1.89439	chrX:49773051-49773073 (+)	23	UAAUCCUUGCUACCUGGGUGAGA
hsa-miR-500a-3p	20503876	MIMAT0002871_st	MIMAT0002871	4.8989	5.23562	5.2089	4.21519	3.22653	3.75556	3.8658	2.00035	chrX:49773090-49773111 (+)	22	AUGCACCUGGGCAAGGAUUCUG
hsa-miR-501-5p	20503877	MIMAT0002872_st	MIMAT0002872	0.815687	1.08395	2.72106	0.964352	0.960008	1.39375	1.7345	0.433591	chrX:49774343-49774364 (+)	22	AAUCCUUUGUCCCUGGGUGAGA
hsa-miR-501-3p	20503878	MIMAT0004774_st	MIMAT0004774	4.83342	4.58187	4.93954	3.55882	3.36357	3.78941	2.38084	3.60062	chrX:49774380-49774401 (+)	22	AAUGCACCCGGGCAAGGAUUCU
hsa-miR-502-5p	20503879	MIMAT0002873_st	MIMAT0002873	0	0.71362	0.60041	0	0	0	0.968916	0	chrX:49779221-49779241 (+)	21	AUCCUUGCUAUCUGGGUGCUA
hsa-miR-502-3p	20503880	MIMAT0004775_st	MIMAT0004775	5.14745	5.51973	5.2505	4.421	4.10707	3.98493	4.01575	3.74645	chrX:49779257-49779278 (+)	22	AAUGCACCUGGGCAAGGAUUCA
hsa-miR-504-3p	20503885	MIMAT0026612_st	MIMAT0026612	1.21516	3.08437	3.86954	2.92813	1.73043	2.65026	3.25665	1.82029	chrX:137749885-137749905 (-)	21	GGGAGUGCAGGGCAGGGUUUC
hsa-miR-505-5p	20503886	MIMAT0004776_st	MIMAT0004776	3.46032	4.28672	3.08601	3.57548	4.89837	4.43556	4.87516	4.7592	chrX:139006355-139006376 (-)	22	GGGAGCCAGGAAGUAUUGAUGU
hsa-miR-505-3p	20503887	MIMAT0002876_st	MIMAT0002876	0	0.5744	1.5898	2.29802	3.36389	2.13505	2.77701	3.04993	chrX:139006319-139006340 (-)	22	CGUCAACACUUGCUGGUUUCCU
hsa-miR-532-5p	20503907	MIMAT0002888_st	MIMAT0002888	5.68386	6.13325	5.63042	4.88714	4.46691	4.842	4.72362	4.22525	chrX:49767773-49767794 (+)	22	CAUGCCUUGAGUGUAGGACCGU
hsa-miR-532-3p	20503908	MIMAT0004780_st	MIMAT0004780	5.49342	5.60613	5.22457	4.5271	4.19694	4.59124	4.04346	3.57314	chrX:49767810-49767831 (+)	22	CCUCCCACACCCAAGGCUUGCA
hsa-miR-455-3p	20504187	MIMAT0004784_st	MIMAT0004784	6.49621	6.10856	4.92003	5.6044	7.00754	7.55921	7.07492	7.24123	chr9:116971767-116971787 (+)	21	GCAGUCCAUGGGCAUAUACAC
hsa-miR-551a	20504268	MIMAT0003214_st	MIMAT0003214	2.89655	1.33584	3.53585	0	3.43139	2.0597	3.01036	0.772511	chr1:3477274-3477294 (-)	21	GCGACCCACUCUUGGUUUCCA
hsa-miR-92b-5p	20504273	MIMAT0004792_st	MIMAT0004792	3.45175	3.70602	4.45044	3.44231	3.14069	3.24605	3.4533	2.60078	chr1:155164987-155165008 (+)	22	AGGGACGGGACGCGGUGCAGUG
hsa-miR-92b-3p	20504274	MIMAT0003218_st	MIMAT0003218	7.89238	7.37354	8.83286	6.36151	6.74337	7.10969	6.6177	7.50271	chr1:155165028-155165049 (+)	22	UAUUGCACUCGUCCCGGCCUCC
hsa-miR-551b-5p	20504289	MIMAT0004794_st	MIMAT0004794	0.889367	1.15983	1.33927	2.71821	0	0.793098	2.66518	2.19856	chr3:168269663-168269684 (+)	22	GAAAUCAAGCGUGGGUGAGACC
hsa-miR-574-5p	20504297	MIMAT0004795_st	MIMAT0004795	1.81194	3.73573	3.61598	2.12198	1.68233	2.81459	4.84842	3.50336	chr4:38869677-38869699 (+)	23	UGAGUGUGUGUGUGUGAGUGUGU
hsa-miR-574-3p	20504298	MIMAT0003239_st	MIMAT0003239	5.79136	5.53782	6.20727	4.55741	5.51331	6.11695	5.59389	5.94607	chr4:38869713-38869734 (+)	22	CACGCUCAUGCACACACCCACA
hsa-miR-575	20504299	MIMAT0003240_st	MIMAT0003240	0.691227	0	0	3.55286	0	0	1.43179	0	chr4:83674505-83674523 (-)	19	GAGCCAGUUGGACAGGAGC
hsa-miR-584-5p	20504312	MIMAT0003249_st	MIMAT0003249	0	0.78075	0.86817	2.18632	1.65263	1.84537	0.573976	0.557661	chr5:148441936-148441957 (-)	22	UUAUGGUUUGCCUGGGACUGAG
hsa-miR-585-5p	20504314	MIMAT0026618_st	MIMAT0026618	0.337927	1.98859	0.87909	2.60369	2.0914	0	0.942286	0.992111	chr5:168690653-168690674 (-)	22	CUAGCACACAGAUACGCCCAGA
hsa-miR-548a-3p	20504316	MIMAT0003251_st	MIMAT0003251	0.763377	0.43253	0	3.33798	2.21544	2.42661	2.72971	0.655921	chr6:18572075-18572096 (+) /// chr6:135560358-135560379 (+) /// chr8:105496612-105496633 (-)	22	CAAAACUGGCAAUUACUUUUGC
hsa-miR-548b-5p	20504319	MIMAT0004798_st	MIMAT0004798	0	1.97448	1.21913	0.651542	0.262348	0.0720478	1.55021	0.320541	chr6:119390263-119390284 (-)	22	AAAAGUAAUUGUGGUUUUGGCC
hsa-miR-589-5p	20504322	MIMAT0004799_st	MIMAT0004799	0.860717	0	2.06029	1.83924	1.26409	0.719038	0.748366	0	chr7:5535504-5535525 (-)	22	UGAGAACCACGUCUGCUCUGAG
hsa-miR-589-3p	20504323	MIMAT0003256_st	MIMAT0003256	2.02187	2.66267	2.22742	2.78259	2.70592	1.47575	2.37765	0.410421	chr7:5535465-5535488 (-)	24	UCAGAACAAAUGCCGGUUCCCAGA
hsa-miR-550a-5p	20504324	MIMAT0004800_st	MIMAT0004800	3.13595	3.32897	3.93075	3.63457	3.3254	2.25936	2.68992	0.476311	chr7:30329431-30329453 (+) /// chr7:32772614-32772636 (+)	23	AGUGCCUGAGGGAGUAAGAGCCC
hsa-miR-550a-3p	20504325	MIMAT0003257_st	MIMAT0003257	3.93674	3.48747	4.93741	3.49104	4.01638	3.68537	3.28597	1.46977	chr7:29720364-29720385 (-) /// chr7:30329470-30329491 (+) /// chr7:32772653-32772674 (+)	22	UGUCUUACUCCCUCAGGCACAU
hsa-miR-595	20504332	MIMAT0003263_st	MIMAT0003263	3.92723	5.43768	5.29283	3.45912	2.55805	2.60859	5.99999	5.18792	chr7:158325425-158325445 (-)	21	GAAGUGUGCCGUGGUGUGUCU
hsa-miR-598-5p	20504336	MIMAT0026620_st	MIMAT0026620	3.00004	4.8863	3.03432	2.80178	2.59416	2.70597	4.40316	1.60923	chr8:10892767-10892789 (-)	23	GCGGUGAUCCCGAUGGUGUGAGC
hsa-miR-605-5p	20504345	MIMAT0003273_st	MIMAT0003273	0	0.66492	0	0	0	0.916458	1.52763	0.220711	chr10:53059348-53059370 (+)	23	UAAAUCCCAUGGUGCCUUCUCCU
hsa-miR-610	20504351	MIMAT0003278_st	MIMAT0003278	3.27347	4.65285	3.89165	2.68357	1.60932	3.58921	5.07764	3.50881	chr11:28078377-28078397 (+)	21	UGAGCUAAAUGUGUGCUGGGA
hsa-miR-615-3p	20504357	MIMAT0003283_st	MIMAT0003283	0	1.8883	1.89166	0	1.38458	0.961688	2.22413	0.685041	chr12:54427794-54427815 (+)	22	UCCGAGCCUGGGUCUCCCUCUU
hsa-miR-548c-5p	20504360	MIMAT0004806_st	MIMAT0004806	1.20469	0.75784	0.68388	0	0.496958	0	3.41263	0.315581	chr12:65016313-65016334 (+)	22	AAAAGUAAUUGCGGUUUUUGCC
hsa-miR-619-5p	20504364	MIMAT0026622_st	MIMAT0026622	6.45492	6.76784	7.38879	6.0215	6.06879	6.5964	7.10246	6.85183	chr12:109230738-109230759 (-)	22	GCUGGGAUUACAGGCAUGAGCC
hsa-miR-623	20504369	MIMAT0003292_st	MIMAT0003292	0	1.1019	1.60746	0	0	0	2.18057	0.965861	chr13:100008400-100008422 (+)	23	AUCCCUUGCAGGGGCUGUUGGGU
hsa-miR-625-5p	20504372	MIMAT0003294_st	MIMAT0003294	7.82977	8.8706	8.19494	7.95891	7.66023	7.4219	7.71269	7.5492	chr14:65937834-65937854 (+)	21	AGGGGGAAAGUUCUAUAGUCC
hsa-miR-628-5p	20504377	MIMAT0004809_st	MIMAT0004809	0	0	0.14396	0.987522	0.517808	0.351528	0.848416	0.574871	chr15:55665189-55665210 (-)	22	AUGCUGACAUAUUUACUAGAGG
hsa-miR-628-3p	20504378	MIMAT0003297_st	MIMAT0003297	0.872017	1.18552	2.46196	1.64299	1.44032	1.95036	2.05557	2.47153	chr15:55665152-55665172 (-)	21	UCUAGUAAGAGUGGCAGUCGA
hsa-miR-629-5p	20504379	MIMAT0004810_st	MIMAT0004810	0.774237	2.1465	1.04405	1.94254	3.97786	4.69505	4.12026	3.88095	chr15:70371766-70371786 (-)	21	UGGGUUUACGUUGGGAGAACU
hsa-miR-629-3p	20504380	MIMAT0003298_st	MIMAT0003298	0	2.19162	1.01606	2.84032	2.2253	2.94187	2.59729	1.2825	chr15:70371726-70371747 (-)	22	GUUCUCCCAACGUAAGCCCAGC
hsa-miR-638	20504391	MIMAT0003308_st	MIMAT0003308	6.38038	7.40567	7.14653	6.47969	6.20393	7.14958	6.96695	7.31649	chr19:10829095-10829119 (+)	25	AGGGAUCGCGGGCGGGUGGCGGCCU
hsa-miR-640	20504393	MIMAT0003310_st	MIMAT0003310	0	0.95689	0	0	0	0.596868	1.06733	0	chr19:19545932-19545952 (+)	21	AUGAUCCAGGAACCUGCCUCU
hsa-miR-641	20504394	MIMAT0003311_st	MIMAT0003311	2.38396	1.97363	1.68636	2.348	2.18726	0.481988	2.28417	0.567181	chr19:40788510-40788533 (-)	24	AAAGACAUAGGAUAGAGUCACCUC
hsa-miR-642a-3p	20504396	MIMAT0020924_st	MIMAT0020924	0	0	0.8938	2.45568	0	0.597728	0	0.601091	chr19:46178236-46178257 (+)	22	AGACACAUUUGGAGAGGGAACC
hsa-miR-652-5p	20504407	MIMAT0022709_st	MIMAT0022709	1.31999	2.36506	1.58647	2.50353	0.727598	1.37443	2.09239	1.13194	chrX:109298577-109298601 (+)	25	CAACCCUAGGAGAGGGUGCCAUUCA
hsa-miR-652-3p	20504408	MIMAT0003322_st	MIMAT0003322	5.53902	6.02776	5.62888	5.0093	6.55617	6.49874	6.5635	6.41074	chrX:109298617-109298637 (+)	21	AAUGGCGCCACUAGGGUUGUG
hsa-miR-663a	20504413	MIMAT0003326_st	MIMAT0003326	4.55584	6.73427	6.1247	5.9308	4.55561	6.88055	2.76196	5.78805	chr20:26188879-26188900 (-)	22	AGGCGGGGCGCCGCGGGACCGC
hsa-miR-656-5p	20504424	MIMAT0026627_st	MIMAT0026627	2.4147	4.11679	3.95248	1.07136	2.29668	2.19211	4.15162	1.12806	chr14:101533068-101533088 (+)	21	AGGUUGCCUGUGAGGUGUUCA
hsa-miR-660-5p	20504431	MIMAT0003338_st	MIMAT0003338	1.34243	2.02633	2.43949	2.2062	2.18259	1.87523	1.99564	1.27069	chrX:49777864-49777885 (+)	22	UACCCAUUGCAUAUCGGAGUUG
hsa-miR-660-3p	20504432	MIMAT0022711_st	MIMAT0022711	1.01678	2.50035	3.73587	1.39235	0.672378	2.04335	3.36498	1.72527	chrX:49777900-49777920 (+)	21	ACCUCCUGUGUGCAUGGAUUA
hsa-miR-421	20504433	MIMAT0003339_st	MIMAT0003339	6.71426	7.26979	6.54277	5.94055	6.48544	6.40044	6.79602	6.76782	chrX:73438227-73438249 (-)	23	AUCAACAGACAUUAAUUGGGCGC
hsa-miR-671-5p	20504552	MIMAT0003880_st	MIMAT0003880	5.3474	5.89906	4.65628	4.45014	5.13154	5.27357	5.73851	5.05519	chr7:150935535-150935557 (+)	23	AGGAAGCCCUGGAGGGGCUGGAG
hsa-miR-671-3p	20504553	MIMAT0004819_st	MIMAT0004819	3.83724	4.54504	4.46959	3.70639	3.24944	4.11257	3.87949	3.81089	chr7:150935574-150935594 (+)	21	UCCGGUUCUCAGGGCUCCACC
hsa-miR-668-5p	20504554	MIMAT0026636_st	MIMAT0026636	0.803967	1.67209	1.86804	1.85077	0	1.39163	0	0.817541	chr14:101521601-101521619 (+)	19	UGCGCCUCGGGUGAGCAUG
hsa-miR-550a-3-5p	20504556	MIMAT0020925_st	MIMAT0020925	4.15792	2.61573	3.83663	3.21621	2.62751	1.61293	2.68787	1.06481	chr7:29720405-29720424 (-)	20	AGUGCCUGAGGGAGUAAGAG
hsa-miR-1224-5p	20504559	MIMAT0005458_st	MIMAT0005458	0.662257	1.54941	2.6346	2.9819	2.92385	3.11471	3.88747	3.17203	chr3:183959193-183959211 (+)	19	GUGAGGACUCGGGAGGUGG
hsa-miR-1224-3p	20504560	MIMAT0005459_st	MIMAT0005459	2.15618	2.02246	0	0	0	1.09508	1.53818	0	chr3:183959257-183959277 (+)	21	CCCCACCUCCUCUCUCCUCAG
hsa-miR-151b	20504561	MIMAT0010214_st	MIMAT0010214	6.40972	6.52392	7.27449	5.77486	6.68887	6.65939	6.674	6.9191	chr14:100575775-100575792 (-)	18	UCGAGGAGCUCACAGUCU
hsa-miR-320b	20504562	MIMAT0005792_st	MIMAT0005792	11.0422	11.0503	10.9238	9.93243	9.98756	9.86614	9.77267	9.62847	chr1:117214409-117214430 (+) /// chr1:224444751-224444772 (-)	22	AAAAGCUGGGUUGAGAGGGCAA
hsa-miR-320c	20504563	MIMAT0005793_st	MIMAT0005793	10.8451	10.891	10.8217	9.85263	9.86262	9.69798	9.57497	9.4923	chr18:19263520-19263539 (+) /// chr18:21901680-21901699 (+)	20	AAAAGCUGGGUUGAGAGGGU
hsa-miR-1296-5p	20504564	MIMAT0005794_st	MIMAT0005794	3.87676	3.41903	3.85859	2.20861	2.12535	2.07977	3.8386	2.23313	chr10:65132772-65132793 (-)	22	UUAGGGCCCUGGCUCCAUCUCC
hsa-miR-1271-5p	20504569	MIMAT0005796_st	MIMAT0005796	3.40813	4.79891	3.5657	3.76059	4.22673	3.78812	4.45289	2.86701	chr5:175794963-175794984 (+)	22	CUUGGCACCUAGCAAGCACUCA
hsa-miR-1301-5p	20504571	MIMAT0026639_st	MIMAT0026639	0	0.7647	0	2.60186	0	0.638238	1.18566	0	chr2:25551558-25551576 (-)	19	CGCUCUAGGCACCGCAGCA
hsa-miR-1301-3p	20504572	MIMAT0005797_st	MIMAT0005797	3.12433	4.27267	3.58038	2.94697	4.51743	4.90919	4.77051	4.88746	chr2:25551520-25551543 (-)	24	UUGCAGCUGCCUGGGAGUGACUUC
hsa-miR-454-3p	20504574	MIMAT0003885_st	MIMAT0003885	0	0.44106	1.73297	0	1.01442	0.178478	1.16617	0.376401	chr17:57215148-57215170 (-)	23	UAGUGCAAUAUUGCUUAUAGGGU
hsa-miR-769-5p	20504580	MIMAT0003886_st	MIMAT0003886	3.45722	4.58612	3.89743	3.50162	3.0139	3.13449	3.45035	1.96158	chr19:46522219-46522240 (+)	22	UGAGACCUCUGGGUUCUGAGCU
hsa-miR-769-3p	20504581	MIMAT0003887_st	MIMAT0003887	2.27437	3.92061	3.19253	3.13466	3.22507	2.92283	3.00662	2.66469	chr19:46522258-46522280 (+)	23	CUGGGAUCUCCGGGGUCUUGGUU
hsa-miR-766-5p	20504582	MIMAT0022714_st	MIMAT0022714	4.4268	5.33952	4.53568	3.50109	4.29922	4.33866	5.3076	4.59106	chrX:118780762-118780783 (-)	22	AGGAGGAAUUGGUGCUGGUCUU
hsa-miR-766-3p	20504583	MIMAT0003888_st	MIMAT0003888	7.13619	7.67479	7.1611	6.44866	6.8163	6.80089	6.57944	6.40026	chrX:118780726-118780747 (-)	22	ACUCCAGCCCCACAGCCUCAGC
hsa-miR-378d	20504584	MIMAT0018926_st	MIMAT0018926	3.99705	5.0098	5.32689	4.28326	4.23076	4.55457	4.39463	3.66473	chr4:5925006-5925025 (-) /// chr8:94928307-94928326 (-)	20	ACUGGACUUGGAGUCAGAAA
hsa-miR-762	20504586	MIMAT0010313_st	MIMAT0010313	5.80995	7.35575	7.00643	6.35019	6.23168	7.48779	5.40474	7.09267	chr16:30905272-30905293 (+)	22	GGGGCUGGGGCCGGGGCCGAGC
hsa-miR-670-5p	20504588	MIMAT0010357_st	MIMAT0010357	2.75223	4.62657	3.49066	3.23962	2.36714	3.55218	4.69241	3.93099	chr11:43581225-43581244 (+)	20	GUCCCUGAGUGUAUGUGGUG
hsa-miR-1298-3p	20504591	MIMAT0026641_st	MIMAT0026641	0	0	0	3.00598	1.0433	0	1.1449	0	chrX:113949721-113949741 (+)	21	CAUCUGGGCAACUGACUGAAC
hsa-miR-764	20504594	MIMAT0010367_st	MIMAT0010367	0	0.51264	1.81573	0	0	0	0.943806	0	chrX:113873928-113873949 (+)	22	GCAGGUGCUCACUUGUCCUCCU
hsa-miR-891a-5p	20505739	MIMAT0004902_st	MIMAT0004902	0	0	1.20711	2.54337	0.674048	0	0	0	chrX:145109359-145109380 (-)	22	UGCAACGAACCUGAGCCACUGA
hsa-miR-450b-5p	20505743	MIMAT0004909_st	MIMAT0004909	2.57106	2.26861	1.81616	2.00261	2.61443	2.6752	2.22773	1.23066	chrX:133674261-133674282 (-)	22	UUUUGCAAUAUGUUCCUGAAUA
hsa-miR-874-3p	20505746	MIMAT0004911_st	MIMAT0004911	4.49678	4.51511	4.36149	4.10585	4.21776	4.33553	3.00662	3.74817	chr5:136983271-136983292 (-)	22	CUGCCCUGGCCCGAGGGACCGA
hsa-miR-541-5p	20505752	MIMAT0004919_st	MIMAT0004919	0	1.32874	0.8145	0	1.10402	0.512358	1.46967	0.616311	chr14:101530841-101530865 (+)	25	AAAGGAUUCUGCUGUCGGUCCCACU
hsa-miR-708-5p	20505760	MIMAT0004926_st	MIMAT0004926	9.0944	4.71915	8.92559	3.89746	9.84169	10.2436	9.82099	9.87677	chr11:79113121-79113143 (-)	23	AAGGAGCUUACAAUCUAGCUGGG
hsa-miR-744-5p	20505787	MIMAT0004945_st	MIMAT0004945	7.18568	8.0441	7.53013	6.91235	7.88393	7.96	7.98629	7.83246	chr17:11985226-11985247 (+)	22	UGCGGGGCUAGGGCUAACAGCA
hsa-miR-744-3p	20505788	MIMAT0004946_st	MIMAT0004946	0.612017	0.0721403	0	0	1.7592	0	1.69706	0	chr17:11985283-11985304 (+)	22	CUGUUGCCACUAACCUCAACCU
hsa-miR-885-5p	20505789	MIMAT0004947_st	MIMAT0004947	1.13407	0.99974	1.56449	0	0.874458	0.785108	2.37399	1.05001	chr3:10436215-10436236 (-)	22	UCCAUUACACUACCCUGCCUCU
hsa-miR-877-5p	20505791	MIMAT0004949_st	MIMAT0004949	3.24894	3.95766	3.55194	3.53867	4.7632	4.5103	4.46315	3.35539	chr6:30552109-30552128 (+)	20	GUAGAGGAGAUGGCGCAGGG
hsa-miR-665	20505795	MIMAT0004952_st	MIMAT0004952	0	1.53077	2.45624	0	0	1.22081	3.04117	0	chr14:101341412-101341431 (+)	20	ACCAGGAGGCUGAGGCCCCU
hsa-miR-374b-5p	20505799	MIMAT0004955_st	MIMAT0004955	1.77145	1.2207	2.09746	1.47679	0	0	1.86626	0.378811	chrX:73438422-73438443 (-)	22	AUAUAAUACAACCUGCUAAGUG
hsa-miR-760	20505801	MIMAT0004957_st	MIMAT0004957	1.8295	3.12968	2.52659	2.91689	3.73031	2.09215	4.12119	2.91882	chr1:94312436-94312455 (+)	20	CGGCUCUGGGUCUGUGGGGA
hsa-miR-933	20506002	MIMAT0004976_st	MIMAT0004976	0	0	1.13214	0	0.849278	0	1.94687	0	chr2:176032370-176032391 (-)	22	UGUGCGCAGGGAGACCUCUCCC
hsa-miR-937-5p	20506006	MIMAT0022938_st	MIMAT0022938	4.68509	5.22041	5.00226	4.69232	4.3224	4.71546	4.9485	4.59935	chr8:144895180-144895199 (-)	20	GUGAGUCAGGGUGGGGCUGG
hsa-miR-939-5p	20506009	MIMAT0004982_st	MIMAT0004982	1.89856	3.45145	3.94307	2.48854	0	3.23056	2.51519	1.98003	chr8:145619408-145619431 (-)	24	UGGGGAGCUGAGGCUCUGGGGGUG
hsa-miR-940	20506011	MIMAT0004983_st	MIMAT0004983	3.61779	3.60432	2.30672	2.74067	2.74884	2.33956	2.31339	0	chr16:2321807-2321827 (+)	21	AAGGCAGGGCCCCCGCUCCCC
hsa-miR-941	20506012	MIMAT0004984_st	MIMAT0004984	3.43964	2.92488	4.09772	0	3.73146	3.94051	4.10166	3.48333	chr20:62550872-62550894 (+) /// chr20:62550928-62550950 (+) /// chr20:62550984-62551006 (+) /// chr20:62551179-62551201 (+)	23	CACCCGGCUGUGUGCACAUGUGC
hsa-miR-942-3p	20506014	MIMAT0026734_st	MIMAT0026734	1.67718	1.78943	2.24284	3.04903	2.77801	0	1.67121	0.284331	chr1:117637317-117637338 (+)	22	CACAUGGCCGAAACAGAGAAGU
hsa-miR-297	20506022	MIMAT0004450_st	MIMAT0004450	6.15823	7.2938	7.55063	5.05674	4.65378	5.90428	7.53003	6.55584	chr4:111781780-111781800 (-)	21	AUGUAUGUGUGCAUGUGCAUG
hsa-miR-1180-5p	20506711	MIMAT0026735_st	MIMAT0026735	2.76364	1.76844	1.53748	0	0	0	1.69715	0	chr17:19247861-19247881 (-)	21	GGACCCACCCGGCCGGGAAUA
hsa-miR-1180-3p	20506712	MIMAT0005825_st	MIMAT0005825	4.38765	5.71722	4.7808	3.9097	4.13087	5.03203	6.60616	5.71905	chr17:19247826-19247847 (-)	22	UUUCCGGCUCGCGUGGGUGUGU
hsa-miR-1183	20506715	MIMAT0005828_st	MIMAT0005828	3.37127	5.07327	4.90412	3.03376	1.93458	3.34841	4.98575	4.01035	chr7:21510723-21510749 (+)	27	CACUGUAGGUGAUGGUGAGAGUGGGCA
hsa-miR-1226-3p	20506768	MIMAT0005577_st	MIMAT0005577	1.83003	2.01041	1.41569	0	4.9414	5.06298	4.72946	5.11436	chr3:47891098-47891119 (+)	22	UCACCAGCCCUGUGUUCCCUAG
hsa-miR-1227-5p	20506771	MIMAT0022941_st	MIMAT0022941	2.52053	3.67898	4.58737	3.19556	3.13952	3.85934	3.81957	3.52514	chr19:2234132-2234148 (-)	17	GUGGGGCCAGGCGGUGG
hsa-miR-1228-5p	20506774	MIMAT0005582_st	MIMAT0005582	5.81063	7.0498	7.13121	5.44885	4.89229	6.14739	7.10602	6.72432	chr12:57588287-57588307 (+)	21	GUGGGCGGGGGCAGGUGUGUG
hsa-miR-1228-3p	20506775	MIMAT0005583_st	MIMAT0005583	3.52998	3.60164	1.46188	2.41611	2.20969	2.26445	3.16552	0	chr12:57588338-57588357 (+)	20	UCACACCUGCCUCGCCCCCC
hsa-miR-1229-5p	20506776	MIMAT0022942_st	MIMAT0022942	2.15618	2.00087	4.6698	3.17022	2.39128	1.96281	2.85528	2.75389	chr5:179225323-179225346 (-)	24	GUGGGUAGGGUUUGGGGGAGAGCG
hsa-miR-1233-5p	20506781	MIMAT0022943_st	MIMAT0022943	3.46275	4.85954	5.49297	4.19512	3.7728	4.09142	4.68138	3.93804	chr15:34674327-34674348 (-)	22	AGUGGGAGGCCAGGGCACGGCA
hsa-miR-1234-3p	20506783	MIMAT0005589_st	MIMAT0005589	2.84777	2.1555	0	0	1.32948	0	1.79415	0	chr8:145625478-145625499 (-)	22	UCGGCCUGACCACCCACCCCAC
hsa-miR-1237-5p	20506787	MIMAT0022946_st	MIMAT0022946	5.12382	7.26074	6.98973	6.56038	5.6845	7.75352	4.66379	6.90107	chr11:64136123-64136143 (+)	21	CGGGGGCGGGGCCGAAGCGCG
hsa-miR-1238-5p	20506789	MIMAT0022947_st	MIMAT0022947	1.50056	1.82035	2.82335	0	1.17963	1.83763	3.77684	1.69777	chr19:10662798-10662820 (+)	23	GUGAGUGGGAGCCCCAGUGUGUG
hsa-miR-1202	20506795	MIMAT0005865_st	MIMAT0005865	0.971177	1.40775	0	2.89234	1.3635	1.26239	0	0.623541	chr6:156267943-156267963 (+)	21	GUGCCAGCUGCAGUGGGGGAG
hsa-miR-1207-5p	20506801	MIMAT0005871_st	MIMAT0005871	6.01163	6.26988	6.46398	5.60648	5.31954	5.12537	6.14799	6.53138	chr8:129061405-129061425 (+)	21	UGGCAGGGAGGCUGGGAGGGG
hsa-miR-1285-3p	20506813	MIMAT0005876_st	MIMAT0005876	4.08529	4.55648	4.17422	3.9104	3.22454	3.58088	3.81957	1.34614	chr2:70480065-70480086 (-) /// chr7:91833341-91833362 (-)	22	UCUGGGCAACAAAGUGAGACCU
hsa-miR-1299	20506825	MIMAT0005887_st	MIMAT0005887	1.56237	2.44233	2.16884	1.58844	3.70104	3.65304	4.74393	3.60835	chr9:69002239-69002260 (-)	22	UUCUGGAAUUCUGUGUGAGGGA
hsa-miR-1303	20506828	MIMAT0005891_st	MIMAT0005891	0	1.13484	0.6212	0	1.31586	0.982978	1.68065	0.567591	chr5:154065387-154065408 (+)	22	UUUAGAGACGGGGUCUUGCUCU
hsa-miR-1304-5p	20506829	MIMAT0005892_st	MIMAT0005892	0	0.66492	0.58902	1.44871	0	0	0	0	chr11:93466890-93466911 (-)	22	UUUGAGGCUACAGUGAGAUGUG
hsa-miR-1244	20506835	MIMAT0005896_st	MIMAT0005896	1.74778	1.52008	4.7	2.08581	3.17871	1.19691	3.522	1.15976	chr12:9392068-9392093 (-) /// chr12:12264940-12264965 (+) /// chr2:232578078-232578103 (+)	26	AAGUAGUUGGUUUGUAUGAGAUGGUU
hsa-miR-1246	20506837	MIMAT0005898_st	MIMAT0005898	2.94819	2.04939	2.3783	2.35393	2.25785	0.686588	2.357	0.708431	chr2:177465752-177465770 (-)	19	AAUGGAUUUUUGGAGCAGG
hsa-miR-1247-3p	20506839	MIMAT0022721_st	MIMAT0022721	0	1.82355	3.53389	3.03373	2.39862	0	2.49259	3.12739	chr14:102026663-102026686 (-)	24	CCCCGGGAACGUCGAGACUGGAGC
hsa-miR-1249	20506841	MIMAT0005901_st	MIMAT0005901	1.23552	0.97144	0.82145	0	0	0	1.40987	0	chr22:45596839-45596860 (-)	22	ACGCCCUUCCCCCCCUUCUUCA
hsa-miR-1250-5p	20506842	MIMAT0005902_st	MIMAT0005902	1.14023	1.91096	3.55945	0	0	0	1.38657	0	chr17:79107065-79107085 (-)	21	ACGGUGCUGGAUGUGGCCUUU
hsa-miR-1254	20506847	MIMAT0005905_st	MIMAT0005905	1.81987	3.17143	3.06933	3.19496	3.0903	2.2124	3.9563	1.19654	chr10:23682337-23682360 (+) /// chr10:70519092-70519115 (+)	24	AGCCUGGAAGCUGGAGCCUGCAGU
hsa-miR-1258	20506851	MIMAT0005909_st	MIMAT0005909	0	0	0.75912	1.63335	0	0	0.748366	0	chr2:180725572-180725592 (-)	21	AGUUAGGAUUAGGUCGUGGAA
hsa-miR-1260a	20506852	MIMAT0005911_st	MIMAT0005911	2.83078	2.37075	2.44879	1.87393	1.99111	2.06963	2.04004	1.01331	chr14:77732574-77732591 (+)	18	AUCCCACCUCUGCCACCA
hsa-miR-1261	20506855	MIMAT0005913_st	MIMAT0005913	0.523437	2.30925	1.03907	1.64392	0.766178	1.12673	1.58138	0.0448715	chr11:90602348-90602366 (-)	19	AUGGAUAAGGCUUUGGCUU
hsa-miR-1263	20506857	MIMAT0005915_st	MIMAT0005915	1.10928	0	0	2.91689	1.30543	0.804258	2.89573	0	chr3:163889311-163889332 (-)	22	AUGGUACCCUGGCAUACUGAGU
hsa-miR-1266-5p	20506862	MIMAT0005920_st	MIMAT0005920	1.29396	0.58844	1.42635	2.05944	1.98268	1.81352	1.23817	0.538541	chr15:52569363-52569385 (-)	23	CCUCAGGGCUGUAGAACAGGGCU
hsa-miR-1268a	20506865	MIMAT0005922_st	MIMAT0005922	4.9383	6.22081	5.48967	4.57529	4.17018	4.68599	6.15368	5.49714	chr15:22513259-22513276 (-)	18	CGGGCGUGGUGGUGGGGG
hsa-miR-1270	20506867	MIMAT0005924_st	MIMAT0005924	0	0.51955	0	0	1.25771	1.69767	1.8297	1.76644	chr19:20510129-20510151 (-) /// chr19:20579288-20579310 (-)	23	CUGGAGAUAUGGAAGAGCUGUGU
hsa-miR-1273a	20506869	MIMAT0005926_st	MIMAT0005926	1.69871	1.63556	2.3783	0	0	0.462008	0.720466	0.669081	chr8:101036213-101036237 (-)	25	GGGCGACAAAGCAAGACUCUUUCUU
hsa-miR-1275	20506872	MIMAT0005929_st	MIMAT0005929	4.46744	4.43592	5.30868	4.35106	6.71165	6.52793	5.60804	5.52431	chr6:33967795-33967811 (-)	17	GUGGGGGAGAGGCUGUC
hsa-miR-1281	20506882	MIMAT0005939_st	MIMAT0005939	4.92021	5.43759	2.04179	3.8523	3.57829	3.40199	4.10059	1.67014	chr22:41488549-41488565 (+)	17	UCGCCUCCUCCUCUCCC
hsa-miR-1292-5p	20506887	MIMAT0005943_st	MIMAT0005943	3.8418	3.07564	4.03818	2.84348	3.39165	3.55658	3.35642	2.08979	chr20:2633425-2633449 (+)	25	UGGGAACGGGUUCCGGCAGACGCUG
hsa-miR-664a-5p	20506896	MIMAT0005948_st	MIMAT0005948	0.465967	0.80959	1.0545	0	1.04235	1.24403	0.877496	1.30171	chr1:220373928-220373951 (-)	24	ACUGGCUAGGGAAAAUGAUUGGAU
hsa-miR-1306-5p	20506898	MIMAT0022726_st	MIMAT0022726	1.57599	1.45259	0	1.98711	1.47024	2.33399	3.01716	1.44215	chr22:20073595-20073616 (+)	22	CCACCUCCCCUGCAAACGUCCA
hsa-miR-1306-3p	20506899	MIMAT0005950_st	MIMAT0005950	2.88128	5.63396	4.30757	3.35733	2.97163	4.38108	5.56807	4.66115	chr22:20073635-20073652 (+)	18	ACGUUGGCUCUGGUGGUG
hsa-miR-1307-3p	20506901	MIMAT0005951_st	MIMAT0005951	5.86276	6.64018	5.95737	5.48825	6.5269	6.41465	6.91143	6.42074	chr10:105154058-105154079 (-)	22	ACUCGGCGUGGCGUCGGUCGUG
hsa-miR-1322	20507094	MIMAT0005953_st	MIMAT0005953	2.87254	3.63643	2.3783	1.38986	1.58685	1.94664	4.14053	1.3215	chr8:10682885-10682903 (-)	19	GAUGAUGCUGCUGAUGCUG
hsa-miR-1469	20507742	MIMAT0007347_st	MIMAT0007347	8.46318	10.2858	8.41267	9.40132	7.10925	9.73192	5.84116	8.28854	chr15:96876490-96876511 (+)	22	CUCGGCGCGGGGCGCGGGCUCC
hsa-miR-1471	20507744	MIMAT0007349_st	MIMAT0007349	1.66812	2.65081	3.16117	3.13032	0	0	3.49018	0.852421	chr2:232756987-232757008 (-)	22	GCCCGCGUGUGGAGCCAGGUGU
hsa-miR-1538	20507944	MIMAT0007400_st	MIMAT0007400	2.74505	4.18106	3.84654	0	1.90397	1.93414	4.0155	2.50103	chr16:69599711-69599733 (-)	23	CGGCCCGGGCUGCUGCUGUUCCU
hsa-miR-320d	20509070	MIMAT0006764_st	MIMAT0006764	8.69017	8.92562	9.53473	8.10033	8.0667	7.60852	7.4873	7.44562	chr13:41301964-41301982 (-) /// chrX:140008337-140008355 (-)	19	AAAAGCUGGGUUGAGAGGA
hsa-miR-1825	20509071	MIMAT0006765_st	MIMAT0006765	2.71802	2.25503	0.57604	0	2.0328	0.898288	1.36592	0	chr20:30825633-30825650 (+)	18	UCCAGUGCCCUCCUCUCC
hsa-miR-1908-5p	20509224	MIMAT0007881_st	MIMAT0007881	4.88147	5.88057	5.96348	5.29643	5.97278	6.37226	5.23899	6.07806	chr11:61582681-61582701 (-)	21	CGGCGGGGACGGCGAUUGGUC
hsa-miR-1909-5p	20509226	MIMAT0007882_st	MIMAT0007882	3.16394	3.83618	4.19068	2.29307	2.23533	2.95299	4.52719	3.40385	chr19:1816202-1816222 (-)	21	UGAGUGCCGGUGCCUGCCCUG
hsa-miR-1909-3p	20509227	MIMAT0007883_st	MIMAT0007883	0	3.59794	3.22281	0	0	2.98628	3.41214	2.45192	chr19:1816168-1816189 (-)	22	CGCAGGGGCCGGGUGCUCACCG
hsa-miR-1910-5p	20509228	MIMAT0007884_st	MIMAT0007884	5.75044	6.69094	5.79137	4.53641	4.67835	5.52597	6.66901	5.55458	chr16:85775275-85775295 (-)	21	CCAGUCCUGUGCCUGCCGCCU
hsa-miR-1910-3p	20509229	MIMAT0026917_st	MIMAT0026917	0	0	0.97182	2.56437	1.24722	0.638238	1.93624	0	chr16:85775237-85775256 (-)	20	GAGGCAGAAGCAGGAUGACA
hsa-miR-1915-3p	20509237	MIMAT0007892_st	MIMAT0007892	6.83417	7.68572	6.65792	6.6451	6.19627	7.79423	6.31876	6.77173	chr10:21785505-21785524 (-)	20	CCCCAGGGCGACGCGGCGGG
hsa-miR-1972	20510799	MIMAT0009447_st	MIMAT0009447	5.33256	5.6272	6.05785	4.24318	4.35194	5.03884	6.27157	4.98726	chr16:15104186-15104207 (-) /// chr16:70064296-70064317 (+)	22	UCAGGCCAGGCACAGUGGCUCA
hsa-miR-1973	20510800	MIMAT0009448_st	MIMAT0009448	0	0.69943	0.8145	1.94876	0.846908	0	0.319706	0	chr4:117220906-117220924 (+)	19	ACCGUGCAAAGGUAGCAUA
hsa-miR-2110	20511549	MIMAT0010133_st	MIMAT0010133	4.09948	4.50596	4.53735	3.58843	4.23059	3.87192	4.24391	3.17889	chr10:115933910-115933931 (-)	22	UUGGGGAAACGGCCGCUGAGUG
hsa-miR-2115-5p	20511558	MIMAT0011158_st	MIMAT0011158	6.42944	6.9973	6.90935	5.62851	6.50626	6.7913	6.39358	6.86546	chr3:48357908-48357929 (-)	22	AGCUUCCAUGACUCCUGAUGGA
hsa-miR-2116-3p	20511561	MIMAT0011161_st	MIMAT0011161	0	0	0	1.90374	1.12172	0.638238	0	0	chr15:59463391-59463411 (-)	21	CCUCCCAUGCCAAGAACUCCC
hsa-miR-2276-3p	20512260	MIMAT0011775_st	MIMAT0011775	0	0	0	2.82787	0.827428	0.861708	0	0	chr13:24736608-24736629 (+)	22	UCUGCAAGUGUCAGAGGCGAGG
hsa-miR-2277-3p	20512262	MIMAT0011777_st	MIMAT0011777	1.13407	2.11862	2.05345	0	1.19446	2.40076	1.29974	0	chr5:92956416-92956436 (-)	21	UGACAGCGCCCUGCCUGGCUC
hsa-miR-2278	20512263	MIMAT0011778_st	MIMAT0011778	2.04675	3.28769	3.07084	0	1.57579	0.973048	3.83814	2.8624	chr9:97572259-97572280 (+)	22	GAGAGCAGUGUGUGUUGCCUGG
hsa-miR-2861	20514163	MIMAT0013802_st	MIMAT0013802	5.78505	6.75784	6.22669	5.50665	5.50249	6.22737	6.39461	6.489	chr9:130548250-130548268 (+)	19	GGGGCCUGGCGGUGGGCGG
hsa-miR-3120-5p	20515514	MIMAT0019198_st	MIMAT0019198	0.419257	1.39441	3.00436	0	0	1.49507	3.24906	0.692551	chr1:172107960-172107980 (+)	21	CCUGUCUGUGCCUGCUGUACA
hsa-miR-3130-5p	20515531	MIMAT0014995_st	MIMAT0014995	0.957637	0.95194	1.37549	0	1.32133	1.49823	2.19812	0.467201	chr2:207648000-207648020 (-) /// chr2:207647970-207647990 (+)	21	UACCCAGUCUCCGGUGCAGCC
hsa-miR-466	20515539	MIMAT0015002_st	MIMAT0015002	1.41956	1.82076	1.58121	3.64554	3.23752	4.79089	2.06806	3.68053	chr3:31203206-31203228 (-)	23	AUACACAUACACGCAACACACAU
hsa-miR-3136-5p	20515540	MIMAT0015003_st	MIMAT0015003	0.117227	0.14303	0.4489	1.75262	0	0.719508	1.23036	0.650841	chr3:69098155-69098177 (-)	23	CUGACUGAAUAGGUAGGGUCAUU
hsa-miR-3138	20515544	MIMAT0015006_st	MIMAT0015006	0.985357	0	0.97124	2.03803	0	0	0.748596	0.418651	chr4:10080246-10080269 (-)	24	UGUGGACAGUGAGGUAGAGGGAGU
hsa-miR-548t-3p	20515549	MIMAT0022730_st	MIMAT0022730	2.01317	1.32	1.96259	2.43443	1.67475	0.722528	2.93052	0.772511	chr4:174189356-174189380 (+)	25	AAAAACCACAAUUACUUUUGCACCA
hsa-miR-3141	20515550	MIMAT0015010_st	MIMAT0015010	5.89278	6.38543	6.58195	5.88135	5.50979	5.6229	6.68517	6.82366	chr5:153975605-153975623 (-)	19	GAGGGCGGGUGGAGGAGGA
hsa-miR-1273c	20515558	MIMAT0015017_st	MIMAT0015017	0.930597	0.69099	0.99338	2.37217	0	0	0	0	chr6:155174503-155174524 (+)	22	GGCGACAAAACGAGACCCUGUC
hsa-miR-3147	20515560	MIMAT0015019_st	MIMAT0015019	3.18229	4.18219	4.59436	3.29542	2.33933	3.56697	4.70849	3.98942	chr7:57472736-57472759 (+)	24	GGUUGGGCAGUGAGGAGGGUGUGA
hsa-miR-3148	20515562	MIMAT0015021_st	MIMAT0015021	3.33411	5.38262	4.69626	2.75266	2.96696	3.90302	5.98119	5.18052	chr8:29814834-29814855 (-)	22	UGGAAAAAACUGGUGUGUGCUU
hsa-miR-3149	20515563	MIMAT0015022_st	MIMAT0015022	1.28111	3.47568	3.30969	0	1.07612	1.43094	3.81037	2.54069	chr8:77879014-77879036 (-)	23	UUUGUAUGGAUAUGUGUGUGUAU
hsa-miR-3151-3p	20515567	MIMAT0027026_st	MIMAT0027026	0.981497	0.97891	0.77457	0	1.33004	0	0.900936	0	chr8:104166890-104166909 (+)	20	CCUGAUCCCACAGCCCACCU
hsa-miR-3154	20515573	MIMAT0015028_st	MIMAT0015028	1.04353	1.0693	1.0025	2.66634	0	0	1.30076	0.540551	chr9:131007235-131007256 (-)	22	CAGAAGGGGAGUUGGGAGCAGA
hsa-miR-3157-3p	20515578	MIMAT0019210_st	MIMAT0019210	4.54781	4.14067	0	1.85352	0.868758	3.28334	3.86341	0.647021	chr10:97824078-97824099 (-)	22	CUGCCCUAGUCUAGCUGAAGCU
hsa-miR-3162-5p	20515585	MIMAT0015036_st	MIMAT0015036	3.44512	4.17235	3.82841	4.3562	2.41334	2.51916	3.32652	3.54385	chr11:59362600-59362622 (-)	23	UUAGGGAGUAGAAGGGUGGGGAG
hsa-miR-3162-3p	20515586	MIMAT0019213_st	MIMAT0019213	2.81181	3.08788	0.78313	0	1.3386	1.89982	2.51647	0.482641	chr11:59362560-59362580 (-)	21	UCCCUACCCCUCCACUCCCCA
hsa-miR-1260b	20515591	MIMAT0015041_st	MIMAT0015041	4.97935	5.5829	6.60797	4.17884	4.81091	4.8757	4.56724	4.72573	chr11:96074611-96074629 (+)	19	AUCCCACCACUGCCACCAU
hsa-miR-3173-3p	20515598	MIMAT0015048_st	MIMAT0015048	0.780817	1.05517	1.00832	2.23186	1.17748	0.591468	1.03471	0	chr14:95604260-95604281 (-)	22	AAAGGAGGAAAUAGGCAGGCCA
hsa-miR-323b-5p	20515600	MIMAT0001630_st	MIMAT0001630	0.881787	1.51352	1.6603	0	0	0.789538	2.53359	0.942741	chr14:101522570-101522592 (+)	23	AGGUUGUCCGUGGUGAGUUCGCA
hsa-miR-3175	20515603	MIMAT0015052_st	MIMAT0015052	2.35364	3.56072	4.85514	3.56153	3.2145	2.54458	0	1.76136	chr15:93447638-93447659 (+)	22	CGGGGAGAGAACGCAGUGACGU
hsa-miR-3177-3p	20515606	MIMAT0015054_st	MIMAT0015054	1.03632	0.90421	2.51967	3.32383	2.42201	2.43202	2.07686	2.53914	chr16:1785039-1785059 (+)	21	UGCACGGCACUGGGGACACGU
hsa-miR-3178	20515607	MIMAT0015055_st	MIMAT0015055	4.11873	8.19196	5.51808	7.15773	4.74157	9.03461	3.12509	8.04473	chr16:2581980-2581996 (-)	17	GGGGCGCGGCCGGAUCG
hsa-miR-548w	20515611	MIMAT0015060_st	MIMAT0015060	2.5402	3.57053	1.92128	0.811872	1.47707	0.640538	3.36207	0.871141	chr16:26036567-26036589 (+)	23	AAAAGUAACUGCGGUUUUUGCCU
hsa-miR-3185	20515617	MIMAT0015065_st	MIMAT0015065	2.14325	2.9946	2.83713	2.93222	1.47981	2.85671	2.58609	2.78445	chr17:46801808-46801830 (-)	23	AGAAGAAGGCGGUCGGUCUGCGG
hsa-miR-3187-5p	20515622	MIMAT0019216_st	MIMAT0019216	1.92542	3.24861	3.73519	0	0	2.63944	4.01082	1.67615	chr19:813590-813612 (+)	23	CCUGGGCAGCGUGUGGCUGAAGG
hsa-miR-3187-3p	20515623	MIMAT0015069_st	MIMAT0015069	0.775937	0.48059	2.24357	0	2.47515	1.66886	2.68866	1.06563	chr19:813627-813646 (+)	20	UUGGCCAUGGGGCUGCGCGG
hsa-miR-320e	20515627	MIMAT0015072_st	MIMAT0015072	4.9404	5.51032	6.92576	5.10207	4.74725	4.56791	4.36237	4.11595	chr19:47212551-47212568 (-)	18	AAAGCUGGGUUGAGAAGG
hsa-miR-3190-5p	20515628	MIMAT0015073_st	MIMAT0015073	0.947677	0.1977	1.40128	0	1.85475	0.781838	0	1.26539	chr19:47730212-47730231 (+)	20	UCUGGCCAGCUACGUCCCCA
hsa-miR-3195	20515637	MIMAT0015079_st	MIMAT0015079	0	2.80207	0	0	0	4.21999	0	1.62457	chr20:60639868-60639884 (+)	17	CGCGCCGGGCCCGGGUU
hsa-miR-3196	20515638	MIMAT0015080_st	MIMAT0015080	5.16369	7.2424	6.55435	6.25752	5.52973	8.17482	5.24796	7.62647	chr20:61870140-61870157 (+)	18	CGGGGCGGCAGGGGCCUC
hsa-miR-1273d	20515650	MIMAT0015090_st	MIMAT0015090	2.5402	3.41313	3.14475	2.71397	2.2389	2.29837	4.36465	3.02725	chr1:10287785-10287809 (+)	25	GAACCCAUGAGGUUGAGGCUGCAGU
hsa-miR-4296	20517673	MIMAT0016845_st	MIMAT0016845	0.200667	0.34125	2.47841	1.34441	0	0.127998	2.34989	0	chr10:126721413-126721429 (-)	17	AUGUGGGCUCAGGCUCA
hsa-miR-378c	20517675	MIMAT0016847_st	MIMAT0016847	7.33964	8.19439	7.54167	7.03987	7.2712	7.40882	7.26225	7.13665	chr10:132760897-132760921 (-)	25	ACUGGACUUGGAGUCAGAAGAGUGG
hsa-miR-4301	20517678	MIMAT0016850_st	MIMAT0016850	0.763377	0.5504	0.45552	0	0	0.749228	1.03471	0	chr11:113320781-113320800 (-)	20	UCCCACUACUUCACUUGUGA
hsa-miR-4299	20517679	MIMAT0016851_st	MIMAT0016851	0	0	0.83872	3.37607	0.837198	0	0.845166	0	chr11:11678208-11678225 (-)	18	GCUGGUGACAUGAGAGGC
hsa-miR-4298	20517680	MIMAT0016852_st	MIMAT0016852	6.489	7.16182	7.26485	6.35583	6.55822	6.56019	7.31502	7.44236	chr11:1880735-1880756 (-)	22	CUGGGACAGGAGGAGGAGGCAG
hsa-miR-4306	20517686	MIMAT0016858_st	MIMAT0016858	1.79116	2.62073	3.0022	3.55214	3.23801	2.07977	3.44826	1.03385	chr13:100295377-100295393 (+)	17	UGGAGAGAAAGGCAGUA
hsa-miR-4312	20517692	MIMAT0016864_st	MIMAT0016864	0.0832575	0	0.65109	0	1.17748	0.443818	0.818416	0	chr15:69094199-69094217 (-)	19	GGCCUUGUUCCUGUCCCCA
hsa-miR-4313	20517693	MIMAT0016865_st	MIMAT0016865	1.71139	0.98914	0	0	0	0	1.27074	0	chr15:76054627-76054646 (-)	20	AGCCCCCUGGCCCCAAACCC
hsa-miR-4323	20517703	MIMAT0016875_st	MIMAT0016875	1.6574	0.35821	1.94626	2.54628	0.952548	1.4294	1.46107	0.567941	chr19:42637607-42637624 (-)	18	CAGCCCCACAGCCUCAGA
hsa-miR-4258	20517707	MIMAT0016879_st	MIMAT0016879	2.4219	2.92895	1.24308	2.60302	0	1.23889	2.62418	0	chr1:154948179-154948195 (+)	17	CCCCGCCACCGCCUUGG
hsa-miR-4259	20517708	MIMAT0016880_st	MIMAT0016880	0	0.52617	0	2.12278	0.652238	0	2.03008	0	chr1:159869779-159869800 (-)	22	CAGUUGGGUCUAGGGGUCAGGA
hsa-miR-4270	20517729	MIMAT0016900_st	MIMAT0016900	6.17707	6.63446	6.12158	6.3524	5.72631	5.94101	6.38941	6.44777	chr3:15537786-15537805 (-)	20	UCAGGGAGUCAGGGGAGGGC
hsa-miR-4274	20517735	MIMAT0016906_st	MIMAT0016906	1.25449	0.63793	0	0	0	1.18511	2.01629	0	chr4:7461818-7461835 (+)	18	CAGCAGUCCCUCCCCCUG
hsa-miR-4281	20517736	MIMAT0016907_st	MIMAT0016907	5.91993	7.19282	6.41854	6.49159	6.04609	6.83463	5.19284	5.90256	chr5:176056450-176056467 (-)	18	GGGUCCCGGGGAGGGGGG
hsa-miR-4279	20517738	MIMAT0016909_st	MIMAT0016909	0.924887	0.51232	0	0	0	0	0.523976	0	chr5:31936218-31936233 (-)	16	CUCUCCUCCCGGCUUC
hsa-miR-4284	20517744	MIMAT0016915_st	MIMAT0016915	3.09435	2.96145	5.01528	2.79088	3.34761	3.08391	3.49976	3.30415	chr7:73125657-73125674 (+)	18	GGGCUCACAUCACCCCAU
hsa-miR-4286	20517745	MIMAT0016916_st	MIMAT0016916	4.24586	4.40885	5.59204	3.30322	3.9679	3.21676	4.12014	2.93066	chr8:10524498-10524514 (+)	17	ACCCCACUCCUGGUACC
hsa-miR-4329	20517752	MIMAT0016923_st	MIMAT0016923	2.58367	1.34437	0	0	0	0.641488	1.5069	0	chrX:112023956-112023974 (-)	19	CCUGAGACCCUAGUUCCAC
hsa-miR-4330	20517753	MIMAT0016924_st	MIMAT0016924	0.293987	1.20354	3.56774	2.25431	2.86168	2.22865	1.44585	1.61835	chrX:150336770-150336788 (+)	19	CCUCAGAUCAGAGCCUUGC
hsa-miR-500b-3p	20517755	MIMAT0027032_st	MIMAT0027032	0.618207	0.28273	1.402	0	0	0	0.904846	0	chrX:49775330-49775349 (+)	20	GCACCCAGGCAAGGAUUCUG
hsa-miR-3609	20517816	MIMAT0017986_st	MIMAT0017986	5.64154	6.13742	6.69072	6.15567	5.51821	5.7204	4.73002	5.84738	chr7:98479323-98479346 (+)	24	CAAAGUGAUGAGUAAUACUGGCUG
hsa-miR-3613-5p	20517820	MIMAT0017990_st	MIMAT0017990	3.97657	4.11222	4.83968	3.97129	4.5426	4.09969	1.74946	3.33709	chr13:50570601-50570622 (-)	22	UGUUGUACUUUUUUUUUUGUUC
hsa-miR-3613-3p	20517821	MIMAT0017991_st	MIMAT0017991	1.15841	0.4059	1.34248	4.25579	2.23267	1.39531	1.5901	0.530171	chr13:50570562-50570585 (-)	24	ACAAAAAAAAAAGCCCAACCCUUC
hsa-miR-3615	20517824	MIMAT0017994_st	MIMAT0017994	6.03031	6.00734	6.3627	4.76566	4.8146	4.88676	4.77993	4.1064	chr17:72744802-72744822 (+)	21	UCUCUCGGCUCCUCGCGGCUC
hsa-miR-3619-5p	20517830	MIMAT0017999_st	MIMAT0017999	0.620097	1.54342	1.88475	0	2.45316	1.98876	3.61191	1.83646	chr22:46486939-46486960 (+)	22	UCAGCAGGCAGGCUGGUGCAGC
hsa-miR-3619-3p	20517831	MIMAT0019219_st	MIMAT0019219	2.13841	3.25199	2.52389	2.75425	0	2.14644	3.6919	2.82913	chr22:46486970-46486991 (+)	22	GGGACCAUCCUGCCUGCUGUGG
hsa-miR-3620-5p	20517833	MIMAT0022967_st	MIMAT0022967	6.08149	6.91258	6.8762	5.61031	5.27562	5.82384	6.62478	6.62573	chr1:228284986-228285007 (+)	22	GUGGGCUGGGCUGGGCUGGGCC
hsa-miR-3620-3p	20517834	MIMAT0018001_st	MIMAT0018001	0.763377	0	0	0	1.37375	1.61006	1.56086	0	chr1:228285021-228285042 (+)	22	UCACCCUGCAUCCCGCACCCAG
hsa-miR-3621	20517835	MIMAT0018002_st	MIMAT0018002	0	2.5895	3.14215	2.8761	1.80644	2.82657	0	1.67394	chr9:140063688-140063707 (-)	20	CGCGGGUCGGGGUCUGCAGG
hsa-miR-3622b-5p	20517838	MIMAT0018005_st	MIMAT0018005	0	0.0765803	1.01047	2.27652	0	0.0639878	1.07533	0	chr8:27559243-27559262 (-)	20	AGGCAUGGGAGGUCAGGUGA
hsa-miR-3622b-3p	20517839	MIMAT0018006_st	MIMAT0018006	1.04028	1.61147	1.69801	0	0	0.967608	1.70348	0	chr8:27559207-27559227 (-)	21	UCACCUGAGCUCCCGUGCCUG
hsa-miR-3646	20517898	MIMAT0018065_st	MIMAT0018065	0.989497	2.19537	0.37552	2.56786	1.3957	1.2845	1.6249	1.72002	chr20:43036817-43036838 (+)	22	AAAAUGAAAUGAGCCCAGCCCA
hsa-miR-3648	20517899	MIMAT0018068_st	MIMAT0018068	0	0	0	2.7471	2.25694	3.04227	0	0	chr21:9825859-9825879 (+)	21	AGCCGCGGGGAUCGCCGAGGG
hsa-miR-3651	20517902	MIMAT0018071_st	MIMAT0018071	5.11908	5.8093	6.49914	5.01829	5.23618	5.13723	5.21916	4.53492	chr9:95054743-95054766 (-)	24	CAUAGCCCGGUCGCUGGUACAUGA
hsa-miR-3652	20517903	MIMAT0018072_st	MIMAT0018072	1.67561	3.28975	3.22267	3.11417	0.948508	1.95352	4.13272	2.46149	chr12:104324203-104324220 (+)	18	CGGCUGGAGGUGUGAGGA
hsa-miR-3655	20517906	MIMAT0018075_st	MIMAT0018075	1.25918	1.90189	1.5186	0	0	0.861938	1.24006	0.921791	chr5:140027429-140027449 (+)	21	GCUUGUCGCUGCGGUGUUGCU
hsa-miR-3656	20517907	MIMAT0018076_st	MIMAT0018076	4.66632	5.86228	6.10238	5.14411	5.18929	6.12243	5.81689	6.2994	chr11:118889702-118889718 (+)	17	GGCGGGUGCGGGGGUGG
hsa-miR-3663-5p	20517915	MIMAT0018084_st	MIMAT0018084	2.46477	3.47957	3.15824	0	1.59192	2.4627	4.08257	2.80197	chr10:118927245-118927265 (-)	21	GCUGGUCUGCGUGGUGCUCGG
hsa-miR-3663-3p	20517916	MIMAT0018085_st	MIMAT0018085	5.17044	7.07775	4.54904	5.87288	4.36508	6.72226	2.5527	6.10275	chr10:118927206-118927228 (-)	23	UGAGCACCACACAGGCCGGGCGC
hsa-miR-3665	20517919	MIMAT0018087_st	MIMAT0018087	8.67563	10.0375	8.69834	8.94071	8.1038	9.79787	9.10385	9.47516	chr13:78272210-78272227 (-)	18	AGCAGGUGCGGGGCGGCG
hsa-miR-3667-5p	20517921	MIMAT0018089_st	MIMAT0018089	3.96916	3.38953	3.77901	2.71893	1.94054	0.769828	2.71563	0	chr22:49937085-49937106 (-)	22	AAAGACCCAUUGAGGAGAAGGU
hsa-miR-3675-3p	20517931	MIMAT0018099_st	MIMAT0018099	0.649797	0	0.72802	0.913592	0	0	0	0	chr1:17185453-17185474 (-)	22	CAUCUCUAAGGAACUCCCCCAA
hsa-miR-3679-5p	20517936	MIMAT0018104_st	MIMAT0018104	3.04474	4.17967	3.75047	4.58217	3.61061	3.15073	3.8886	3.39286	chr2:134884701-134884723 (+)	23	UGAGGAUAUGGCAGGGAAGGGGA
hsa-miR-3682-3p	20517943	MIMAT0018110_st	MIMAT0018110	0.456887	1.70339	2.75295	2.70523	2.24037	1.06291	3.64569	1.61783	chr2:54076273-54076293 (-)	21	UGAUGAUACAGGUGGAGGUAG
hsa-miR-3689a-5p	20517951	MIMAT0018117_st	MIMAT0018117	0.973267	0.46532	0.49525	0	0	1.04129	0.575046	0	chr9:137741380-137741401 (-)	22	UGUGAUAUCAUGGUUCCUGGGA
hsa-miR-3689a-3p	20517952	MIMAT0018118_st	MIMAT0018118	1.21444	2.16783	2.97419	2.69432	0	0.520948	3.0453	0.617041	chr9:137741340-137741361 (-)	22	CUGGGAGGUGUGAUAUCGUGGU
hsa-miR-3907	20518426	MIMAT0018179_st	MIMAT0018179	4.66027	5.53958	5.41022	4.13165	3.1208	4.54505	5.33467	4.38635	chr7:151130612-151130633 (-)	22	AGGUGCUCCAGGCUGGCUCACA
hsa-miR-3689b-5p	20518427	MIMAT0018180_st	MIMAT0018180	0.973267	0.46532	0.49525	0	0	1.04129	0.575046	0	chr9:137742052-137742073 (-)	22	UGUGAUAUCAUGGUUCCUGGGA
hsa-miR-3689b-3p	20518428	MIMAT0018181_st	MIMAT0018181	0	2.40987	1.55612	0	0	0	1.29974	0	chr9:137742012-137742033 (-)	22	CUGGGAGGUGUGAUAUUGUGGU
hsa-miR-3911	20518432	MIMAT0018185_st	MIMAT0018185	4.73894	4.80235	4.87092	4.94126	4.39689	4.4626	5.74387	5.86008	chr9:130453042-130453063 (-)	22	UGUGUGGAUCCUGGAGGAGGCA
hsa-miR-3916	20518439	MIMAT0018190_st	MIMAT0018190	1.67617	2.21829	2.36074	2.01661	0	2.03711	2.04717	0.601091	chr1:247365318-247365343 (-)	26	AAGAGGAAGAAAUGGCUGGUUCUCAG
hsa-miR-3917	20518440	MIMAT0018191_st	MIMAT0018191	0	2.99972	1.34569	2.72064	1.01361	1.94872	3.34736	1.48371	chr1:26232875-26232894 (-)	20	GCUCGGACUGAGCAGGUGGG
hsa-miR-3921	20518446	MIMAT0018196_st	MIMAT0018196	2.58149	2.72345	0.65272	1.94893	2.75643	2.49419	2.86051	0.379151	chr3:99683169-99683191 (-)	23	UCUCUGAGUACCAUAUGCCUUGU
hsa-miR-3928-5p	20518458	MIMAT0027037_st	MIMAT0027037	1.51954	3.70749	2.63182	0	1.1467	1.62436	3.32051	1.10341	chr22:31556081-31556103 (-)	23	UGAAGCUCUAAGGUUCCGCCUGC
hsa-miR-3935	20518623	MIMAT0018350_st	MIMAT0018350	3.29002	4.69057	1.34654	3.58635	1.06995	2.19265	3.49955	1.08231	chr16:56279489-56279510 (+)	22	UGUAGAUACGAGCACCAGCCAC
hsa-miR-3940-5p	20518629	MIMAT0019229_st	MIMAT0019229	4.26304	5.61996	5.72376	4.68726	4.11825	5.17892	4.95903	5.52054	chr19:6416481-6416500 (-)	20	GUGGGUUGGGGCGGGCUCUG
hsa-miR-3940-3p	20518630	MIMAT0018356_st	MIMAT0018356	3.02182	2.94686	3.27081	2.7345	3.34826	2.25397	2.01693	1.45366	chr19:6416445-6416466 (-)	22	CAGCCCGGAUCCCAGCCCACUU
hsa-miR-3944-3p	20518636	MIMAT0018360_st	MIMAT0018360	2.85571	4.7419	4.48521	0	2.05287	3.78873	4.65662	3.75247	chr10:135185083-135185105 (-)	23	UUCGGGCUGGCCUGCUGCUCCGG
hsa-miR-642b-3p	20518721	MIMAT0018444_st	MIMAT0018444	0.791487	1.596	0.98689	2.21716	1.27929	1.61006	1.45278	0.244011	chr19:46178199-46178220 (-)	22	AGACACAUUUGGAGAGGGACCC
hsa-miR-550b-2-5p	20518722	MIMAT0022737_st	MIMAT0022737	1.98404	2.43928	3.04531	2.59255	1.6786	1.58403	1.81534	1.17149	chr7:30329470-30329491 (-) /// chr7:32772653-32772674 (-)	22	AUGUGCCUGAGGGAGUAAGACA
hsa-miR-548aa	20518725	MIMAT0018447_st	MIMAT0018447	2.01317	1.32	1.96259	2.43443	1.67475	0.722528	2.93052	0.772511	chr17:65467659-65467683 (+) /// chr8:124360328-124360352 (+)	25	AAAAACCACAAUUACUUUUGCACCA
hsa-miR-548o-5p	20518781	MIMAT0022738_st	MIMAT0022738	1.20469	0.75784	0.68388	0	0.496958	0	3.41263	0.315581	chr20:37145212-37145233 (+)	22	AAAAGUAAUUGCGGUUUUUGCC
hsa-miR-1268b	20518782	MIMAT0018925_st	MIMAT0018925	4.9793	6.03786	5.88367	4.63384	4.36624	4.86092	6.3009	5.60184	chr17:78072630-78072649 (+)	20	CGGGCGUGGUGGUGGGGGUG
hsa-miR-378e	20518783	MIMAT0018927_st	MIMAT0018927	0.970497	0.23653	2.49311	2.597	2.51976	1.77234	0	1.34412	chr5:169455549-169455567 (+)	19	ACUGGACUUGGAGUCAGGA
hsa-miR-378f	20518788	MIMAT0018932_st	MIMAT0018932	6.13069	7.08364	6.76159	6.1832	6.17058	6.34923	6.31008	6.0392	chr1:24255611-24255630 (+)	20	ACUGGACUUGGAGCCAGAAG
hsa-miR-378g	20518794	MIMAT0018937_st	MIMAT0018937	3.48255	4.76943	4.29417	3.59475	3.44887	3.47711	3.92224	2.58641	chr1:95211436-95211455 (-)	20	ACUGGGCUUGGAGUCAGAAG
hsa-miR-548ac	20518795	MIMAT0018938_st	MIMAT0018938	0.397577	0	0	2.86575	1.04498	1.1064	2.43848	0	chr1:117102660-117102681 (-)	22	CAAAAACCGGCAAUUACUUUUG
hsa-miR-4429	20518801	MIMAT0018944_st	MIMAT0018944	6.21197	6.78805	7.51693	6.09054	5.70699	5.50553	5.34316	5.7473	chr2:11680778-11680797 (-)	20	AAAAGCUGGGCUGAGAGGCG
hsa-miR-4430	20518802	MIMAT0018945_st	MIMAT0018945	1.50271	2.52619	4.1564	3.10045	1.44308	1.88023	2.37514	2.05947	chr2:33643586-33643603 (+)	18	AGGCUGGAGUGAGCGGAG
hsa-miR-4433-5p	20518806	MIMAT0020956_st	MIMAT0020956	2.45363	2.73806	0	1.93273	1.89529	1.31415	1.94703	0.730571	chr2:64567904-64567924 (+)	21	CGUCCCACCCCCCACUCCUGU
hsa-miR-4433-3p	20518807	MIMAT0018949_st	MIMAT0018949	3.33308	3.2166	4.27038	3.92461	4.2039	3.97684	4.5816	5.1436	chr2:64567943-64567963 (+)	21	ACAGGAGUGGGGGUGGGACAU
hsa-miR-4440	20518815	MIMAT0018958_st	MIMAT0018958	7.82476	8.45422	7.82324	7.12295	6.26655	7.15091	8.17407	7.41361	chr2:239990525-239990546 (-)	22	UGUCGUGGGGCUUGCUGGCUUG
hsa-miR-4442	20518817	MIMAT0018960_st	MIMAT0018960	0	1.00347	1.7313	3.7247	0	0	1.5698	0.671171	chr3:25706366-25706382 (-)	17	GCCGGACAAGAGGGAGG
hsa-miR-4443	20518818	MIMAT0018961_st	MIMAT0018961	7.26779	7.26394	8.3347	6.72719	7.46185	7.01627	6.66638	6.42275	chr3:48238062-48238078 (+)	17	UUGGAGGCGUGGGUUUU
hsa-miR-4444	20518819	MIMAT0018962_st	MIMAT0018962	0	0	0.89017	2.03488	0	0	1.94171	0	chr2:178077496-178077513 (+) /// chr3:75263669-75263686 (+)	18	CUCGAGUUGGAAGAGGCG
hsa-miR-4446-3p	20518823	MIMAT0018965_st	MIMAT0018965	0	0	1.20711	3.39354	1.51956	0	0	0	chr3:113313765-113313786 (+)	22	CAGGGCUGGCAGUGACAUGGGU
hsa-miR-4449	20518826	MIMAT0018968_st	MIMAT0018968	2.92687	3.18144	3.64417	2.88652	3.09753	3.60146	3.74514	3.60633	chr4:53578887-53578908 (+)	22	CGUCCCGGGGCUGCGCGAGGCA
hsa-miR-4454	20518834	MIMAT0018976_st	MIMAT0018976	8.47969	8.97856	8.86597	7.72667	8.97	9.11735	8.6289	8.30731	chr4:164014759-164014778 (-)	20	GGAUCCGAGUCACGGCACCA
hsa-miR-4455	20518835	MIMAT0018977_st	MIMAT0018977	0.585657	2.11512	2.82573	0	1.57817	0.439408	3.35613	1.14161	chr4:185859575-185859591 (-)	17	AGGGUGUGUGUGUUUUU
hsa-miR-4458	20518838	MIMAT0018980_st	MIMAT0018980	2.63578	2.69258	3.30815	2.50447	0.727598	0.438918	2.93315	0.951001	chr5:8461046-8461064 (+)	19	AGAGGUAGGUGUGGAAGAA
hsa-miR-4459	20518839	MIMAT0018981_st	MIMAT0018981	5.77103	6.46069	6.81657	5.80135	5.93714	5.59464	6.87579	6.86878	chr5:53371390-53371411 (-)	22	CCAGGAGGCGGAGGAGGUGGAG
hsa-miR-4461	20518841	MIMAT0018983_st	MIMAT0018983	0.958347	1.38146	1.74253	2.24368	1.14937	1.36651	1.62753	0.937271	chr5:134263774-134263796 (+)	23	GAUUGAGACUAGUAGGGCUAGGC
hsa-miR-378h	20518842	MIMAT0018984_st	MIMAT0018984	0.732357	2.13629	3.56115	2.31163	2.0808	1.39841	2.15207	2.44699	chr5:154209026-154209046 (+)	21	ACUGGACUUGGUGUCAGAUGG
hsa-miR-3135b	20518843	MIMAT0018985_st	MIMAT0018985	5.13271	5.89467	6.20206	4.89577	4.40545	4.92748	6.0087	5.27956	chr6:32717729-32717750 (-)	22	GGCUGGAGCGAGUGCAGUGGUG
hsa-miR-4462	20518844	MIMAT0018986_st	MIMAT0018986	4.98472	5.73913	5.46417	4.66594	3.23947	4.60702	5.71519	4.60022	chr6:37523142-37523164 (-)	23	UGACACGGAGGGUGGCUUGGGAA
hsa-miR-4463	20518845	MIMAT0018987_st	MIMAT0018987	4.76529	6.12619	5.3952	5.36134	4.27169	5.95672	4.95243	5.37265	chr6:76138162-76138178 (+)	17	GAGACUGGGGUGGGGCC
hsa-miR-548aj-3p	20518848	MIMAT0018990_st	MIMAT0018990	0	0	0	0.753472	0.826728	0.321768	1.34989	0	chr6:132436339-132436359 (-) /// chrX:37883165-37883185 (-)	21	UAAAAACUGCAAUUACUUUUA
hsa-miR-4466	20518851	MIMAT0018993_st	MIMAT0018993	6.60145	7.95785	7.38726	7.00436	6.64635	8.18214	6.08584	7.51774	chr6:157100844-157100861 (-)	18	GGGUGCGGGCCGGCGGGG
hsa-miR-4467	20518852	MIMAT0018994_st	MIMAT0018994	0	0	3.32777	2.22091	1.58133	2.09186	0	0	chr7:102111919-102111940 (+)	22	UGGCGGCGGUAGUUAUGGGCUU
hsa-miR-4472	20518857	MIMAT0018999_st	MIMAT0018999	0	0.52584	2.92924	0	0	0	0.907396	0.605151	chr12:116866099-116866116 (-) /// chr8:143257757-143257774 (+)	18	GGUGGGGGGUGUUGUUUU
hsa-miR-4476	20518862	MIMAT0019003_st	MIMAT0019003	0.937747	0	0.79905	3.27613	1.08207	0.677268	0.748366	0.0957015	chr9:36893463-36893484 (-)	22	CAGGAAGGAUUUAGGGACAGGC
hsa-miR-4478	20518865	MIMAT0019006_st	MIMAT0019006	0	0.66492	1.74996	2.3923	1.4272	0.589738	3.17173	0.944781	chr9:124882426-124882442 (-)	17	GAGGCUGAGCUGAGGAG
hsa-miR-3689c	20518866	MIMAT0019007_st	MIMAT0019007	0	2.40987	1.55612	0	0	0	1.29974	0	chr9:137741148-137741169 (-)	22	CUGGGAGGUGUGAUAUUGUGGU
hsa-miR-3689e	20518868	MIMAT0019009_st	MIMAT0019009	0.973267	0.46532	0.49525	0	0	1.04129	0.575046	0	chr9:137742460-137742481 (-)	22	UGUGAUAUCAUGGUUCCUGGGA
hsa-miR-3689f	20518869	MIMAT0019010_st	MIMAT0019010	2.04657	3.53536	1.76043	1.98464	0	1.11618	3.25064	0.824451	chr9:137742629-137742650 (-)	22	UGUGAUAUCGUGCUUCCUGGGA
hsa-miR-4481	20518874	MIMAT0019015_st	MIMAT0019015	3.22718	5.42928	4.71042	3.48605	3.55465	3.63832	5.52479	4.08983	chr10:12695180-12695196 (-)	17	GGAGUGGGCUGGUGGUU
hsa-miR-4484	20518878	MIMAT0019018_st	MIMAT0019018	4.31063	5.46703	5.16346	4.8883	4.28044	4.28169	4.00967	3.48298	chr10:127508372-127508391 (+)	20	AAAAGGCGGGAGAAGCCCCA
hsa-miR-4485	20518879	MIMAT0019019_st	MIMAT0019019	2.91552	2.88394	3.80902	2.49549	3.60234	2.86633	3.00662	1.07546	chr11:10529824-10529843 (-)	20	UAACGGCCGCGGUACCCUAA
hsa-miR-4486	20518880	MIMAT0019020_st	MIMAT0019020	5.61958	6.40413	5.9258	5.1217	3.70885	5.13498	5.70576	4.30206	chr11:19596861-19596877 (+)	17	GCUGGGCGAGGCUGGCA
hsa-miR-4487	20518881	MIMAT0019021_st	MIMAT0019021	1.70154	1.97173	2.50255	2.96271	1.87745	1.14437	1.01066	1.19185	chr11:47422574-47422592 (+)	19	AGAGCUGGCUGAAGGGCAG
hsa-miR-4488	20518882	MIMAT0019022_st	MIMAT0019022	4.7073	7.2759	6.7315	6.23986	5.62689	7.82336	5.1619	6.73257	chr11:61276071-61276088 (+)	18	AGGGGGCGGGCUCCGGCG
hsa-miR-4491	20518886	MIMAT0019026_st	MIMAT0019026	0.755357	0.68982	1.46947	2.29405	0	0	1.19451	0	chr11:111218527-111218548 (+)	22	AAUGUGGACUGGUGUGACCAAA
hsa-miR-4492	20518887	MIMAT0019027_st	MIMAT0019027	0	3.34056	4.52968	0	2.53277	3.31163	2.37348	2.84498	chr11:118781474-118781490 (+)	17	GGGGCUGGGCGCGCGCC
hsa-miR-4497	20518892	MIMAT0019032_st	MIMAT0019032	6.51127	9.1078	6.40987	7.73257	5.93532	9.32738	5.83669	8.02027	chr12:110271155-110271171 (+)	17	CUCCGGGACGGCUGGGC
hsa-miR-4498	20518893	MIMAT0019033_st	MIMAT0019033	0.656587	1.40222	4.03317	2.27678	0	0	2.58941	0.509391	chr12:120593277-120593298 (-)	22	UGGGCUGGCAGGGCAAGUGCUG
hsa-miR-4499	20518895	MIMAT0019035_st	MIMAT0019035	0.0209375	0	0.79652	2.66031	0.824698	0.627398	0.279096	0	chr13:21007969-21007985 (-)	17	AAGACUGAGAGGAGGGA
hsa-miR-4502	20518898	MIMAT0019038_st	MIMAT0019038	5.30383	6.59118	6.60797	4.49597	3.96146	4.93947	6.22087	4.86091	chr13:115039360-115039381 (+)	22	GCUGAUGAUGAUGGUGCUGAAG
hsa-miR-4505	20518901	MIMAT0019041_st	MIMAT0019041	3.33013	4.93642	5.0399	4.51162	3.39165	4.16844	4.05711	4.6677	chr14:74225452-74225469 (+)	18	AGGCUGGGCUGGGACGGA
hsa-miR-2392	20518903	MIMAT0019043_st	MIMAT0019043	0	2.33168	3.50061	3.25462	0.727598	1.44317	2.45729	2.43078	chr14:101280888-101280907 (+)	20	UAGGAUGGGGGUGAGAGGUG
hsa-miR-4507	20518904	MIMAT0019044_st	MIMAT0019044	5.78247	6.77407	6.01495	5.54596	5.00736	5.84355	6.3919	6.20025	chr14:106324294-106324313 (-)	20	CUGGGUUGGGCUGGGCUGGG
hsa-miR-4508	20518905	MIMAT0019045_st	MIMAT0019045	4.56697	6.70023	6.54609	5.69766	5.75292	7.06474	5.55745	6.58294	chr15:23807254-23807270 (-)	17	GCGGGGCUGGGCGCGCG
hsa-miR-4513	20518910	MIMAT0019050_st	MIMAT0019050	0	0	0.82539	0	0	0	1.59777	0.552311	chr15:75081064-75081085 (-)	22	AGACUGACGGCUGGAGGCCCAU
hsa-miR-4516	20518913	MIMAT0019053_st	MIMAT0019053	6.66839	8.5601	6.34781	7.6029	5.2845	8.12474	6.20414	7.55189	chr16:2183121-2183137 (+)	17	GGGAGAAGGGUCGGGGC
hsa-miR-4518	20518915	MIMAT0019055_st	MIMAT0019055	0	0.5711	0	1.83087	0.957068	0	0.783176	0	chr16:30515289-30515314 (+)	26	GCUCAGGGAUGAUAACUGUGCUGAGA
hsa-miR-4521	20518919	MIMAT0019058_st	MIMAT0019058	5.5803	6.54022	5.64722	3.89939	5.64825	5.55006	6.56169	6.00211	chr17:8090266-8090287 (+)	22	GCUAAGGAAGUCCUGUGCUCAG
hsa-miR-4530	20518931	MIMAT0019069_st	MIMAT0019069	4.35354	6.25256	4.60469	5.72734	4.28746	6.55413	5.92821	5.67626	chr19:39900269-39900286 (-)	18	CCCAGCAGGACGGGAGCG
hsa-miR-4532	20518933	MIMAT0019071_st	MIMAT0019071	2.7026	5.19672	3.77916	4.80071	3.73777	4.80704	1.80071	2.86982	chr20:56470455-56470471 (+)	17	CCCCGGGGAGCCCGGCG
hsa-miR-4534	20518935	MIMAT0019073_st	MIMAT0019073	0.409047	3.21299	4.74777	3.39297	2.65239	2.43707	3.71803	3.39431	chr22:38384836-38384852 (+)	17	GGAUGGAGGAGGGGUCU
hsa-miR-378i	20518936	MIMAT0019074_st	MIMAT0019074	5.95157	6.91378	6.3523	5.93671	5.91478	6.12041	5.9186	5.67443	chr22:42319275-42319295 (-)	21	ACUGGACUAGGAGUCAGAAGG
hsa-miR-4535	20518937	MIMAT0019075_st	MIMAT0019075	0.537017	2.916	3.55945	3.2667	1.7503	1.47455	2.51033	1.24905	chr22:49176143-49176159 (+)	17	GUGGACCUGGCUGGGAC
hsa-miR-548am-5p	20518938	MIMAT0022740_st	MIMAT0022740	1.20469	0.75784	0.68388	0	0.496958	0	3.41263	0.315581	chrX:16645178-16645199 (-)	22	AAAAGUAAUUGCGGUUUUUGCC
hsa-miR-1587	20518940	MIMAT0019077_st	MIMAT0019077	3.96115	5.03695	5.41386	3.92422	3.37452	4.04299	5.09115	5.12021	chrX:39696816-39696835 (+)	20	UUGGGCUGGGCUGGGUUGGG
hsa-miR-4538	20518945	MIMAT0019081_st	MIMAT0019081	4.48743	5.7226	4.26156	4.39894	3.95708	4.68209	5.0775	5.06277	chr14:106324390-106324411 (-)	22	GAGCUUGGAUGAGCUGGGCUGA
hsa-miR-4539	20518946	MIMAT0019082_st	MIMAT0019082	5.10197	6.2698	5.4431	5.20804	4.47667	5.40993	5.93027	5.87796	chr14:106323682-106323703 (-)	22	GCUGAACUGGGCUGAGCUGGGC
hsa-miR-3960	20519048	MIMAT0019337_st	MIMAT0019337	8.79899	9.69478	9.59599	8.7139	8.79127	9.62572	9.30736	9.87842	chr9:130548158-130548177 (+)	20	GGCGGCGGCGGAGGCGGGGG
hsa-miR-4632-5p	20519405	MIMAT0022977_st	MIMAT0022977	4.75622	5.85737	5.70936	4.52598	4.38358	4.58286	6.53597	5.5273	chr1:12251770-12251792 (+)	23	GAGGGCAGCGUGGGUGUGGCGGA
hsa-miR-4634	20519409	MIMAT0019691_st	MIMAT0019691	0	3.33119	2.23649	2.16768	0	3.80371	0	0	chr5:174178746-174178764 (+)	19	CGGCGCGACCGGCCCGGGG
hsa-miR-4635	20519410	MIMAT0019692_st	MIMAT0019692	2.33391	2.14884	2.85234	2.51503	2.21314	2.96981	2.03266	2.78108	chr5:1063019-1063039 (-)	21	UCUUGAAGUCAGAACCCGCAA
hsa-miR-4638-5p	20519413	MIMAT0019695_st	MIMAT0019695	1.26191	0.82634	1.20711	2.91689	0	1.25167	1.88757	1.14574	chr5:180649612-180649632 (-)	21	ACUCGGCUGCGGUGGACAAGU
hsa-miR-4640-5p	20519417	MIMAT0019699_st	MIMAT0019699	2.02043	2.89023	3.55953	3.15789	0	2.45486	3.73787	0	chr6:30858668-30858690 (+)	23	UGGGCCAGGGAGCAGCUGGUGGG
hsa-miR-4642	20519420	MIMAT0019702_st	MIMAT0019702	0.831107	0.91383	1.10304	0	0	0	1.3694	0	chr6:44403387-44403408 (+)	22	AUGGCAUCGUCCCCUGGUGGCU
hsa-miR-4646-5p	20519425	MIMAT0019707_st	MIMAT0019707	0	1.82076	2.47078	3.32297	0	1.40531	2.13659	1.51806	chr6:31668847-31668868 (-)	22	ACUGGGAAGAGGAGCUGAGGGA
hsa-miR-4647	20519427	MIMAT0019709_st	MIMAT0019709	1.81335	2.3369	3.7734	2.91402	1.24904	1.75898	4.15882	3.31134	chr6:44221990-44222012 (-)	23	GAAGAUGGUGCUGUGCUGAGGAA
hsa-miR-4649-5p	20519429	MIMAT0019711_st	MIMAT0019711	2.92831	4.95505	4.70989	4.14081	2.46061	4.92154	2.41127	4.81606	chr7:44150450-44150473 (+)	24	UGGGCGAGGGGUGGGCUCUCAGAG
hsa-miR-4651	20519433	MIMAT0019715_st	MIMAT0019715	4.30647	5.1829	4.9466	4.32936	3.40557	4.30322	4.99348	4.97129	chr7:75544524-75544543 (+)	20	CGGGGUGGGUGAGGUCGGGC
hsa-miR-4655-5p	20519439	MIMAT0019721_st	MIMAT0019721	1.74313	2.38548	2.8	3.15464	1.44282	0	2.87775	2.91882	chr7:1883859-1883880 (-)	22	CACCGGGGAUGGCAGAGGGUCG
hsa-miR-4656	20519441	MIMAT0019723_st	MIMAT0019723	2.07826	3.08564	4.56964	3.2108	1.61205	2.33191	4.09215	4.2525	chr7:4828239-4828261 (-)	23	UGGGCUGAGGGCAGGAGGCCUGU
hsa-miR-4663	20519453	MIMAT0019735_st	MIMAT0019735	3.25803	3.54637	1.31253	3.09366	3.15516	3.08173	3.2687	0.963711	chr8:124228071-124228094 (-)	24	AGCUGAGCUCCAUGGACGUGCAGU
hsa-miR-4667-5p	20519461	MIMAT0019743_st	MIMAT0019743	0	1.00559	2.87318	3.62593	1.39728	0	0.991576	0	chr9:35608093-35608114 (+)	22	ACUGGGGAGCAGAAGGAGAACC
hsa-miR-4668-5p	20519463	MIMAT0019745_st	MIMAT0019745	3.01751	0.63855	2.08774	4.2936	3.14561	2.65026	1.62751	0.601091	chr9:114694380-114694402 (+)	23	AGGGAAAAAAAAAAGGAUUUGUC
hsa-miR-219b-5p	20519465	MIMAT0019747_st	MIMAT0019747	0.662217	0.19307	0.58029	1.58029	0	0	0.868926	0	chr9:131154913-131154934 (+)	22	AGAUGUCCAGCCACAAUUCUCG
hsa-miR-4669	20519467	MIMAT0019749_st	MIMAT0019749	5.84259	6.18669	5.99	5.42926	5.37284	5.35255	6.44787	6.8115	chr9:137271295-137271316 (+)	22	UGUGUCCGGGAAGUGGAGGAGG
hsa-miR-4674	20519474	MIMAT0019756_st	MIMAT0019756	2.59272	4.68285	3.69196	4.42726	0	5.02964	0	3.32579	chr9:139440634-139440654 (-)	21	CUGGGCUCGGGACGCGCGGCU
hsa-miR-4682	20519485	MIMAT0019767_st	MIMAT0019767	0.394637	0	0.8145	0	0	1.29814	2.5548	0	chr10:121718034-121718056 (+)	23	UCUGAGUUCCUGGAGCCUGGUCU
hsa-miR-4684-3p	20519488	MIMAT0019770_st	MIMAT0019770	0	1.08884	0.91074	1.52713	0.970338	0	3.47066	2.62381	chr1:23046059-23046080 (+)	22	UGUUGCAAGUCGGUGGAGACGU
hsa-miR-4685-5p	20519489	MIMAT0019771_st	MIMAT0019771	0	1.66118	2.67719	3.25111	0	0	2.78458	0	chr10:100191089-100191114 (-)	26	CCCAGGGCUUGGAGUGGGGCAAGGUU
hsa-miR-4685-3p	20519490	MIMAT0019772_st	MIMAT0019772	1.53587	2.78221	4.38525	0	1.38458	2.18085	3.24337	2.20999	chr10:100191049-100191070 (-)	22	UCUCCCUUCCUGCCCUGGCUAG
hsa-miR-4686	20519491	MIMAT0019773_st	MIMAT0019773	0.337677	1.78021	1.01047	0	1.57579	0	3.04382	0.501941	chr11:2194302-2194324 (+)	23	UAUCUGCUGGGCUUUCUGGUGUU
hsa-miR-4687-3p	20519493	MIMAT0019775_st	MIMAT0019775	6.93926	7.42229	6.82331	6.64303	6.6345	7.02994	7.06775	7.3997	chr11:3877343-3877363 (+)	21	UGGCUGUUGGAGGGGGCAGGC
hsa-miR-1343-5p	20519494	MIMAT0027038_st	MIMAT0027038	0	3.81097	4.2715	3.69609	3.13389	3.92562	0	2.31069	chr11:34963398-34963419 (+)	22	UGGGGAGCGGCCCCCGGGUGGG
hsa-miR-4688	20519496	MIMAT0019777_st	MIMAT0019777	0	0.75886	1.2631	2.96304	0	0	0	0.866451	chr11:46398006-46398027 (+)	22	UAGGGGCAGCAGAGGACCUGGG
hsa-miR-4689	20519497	MIMAT0019778_st	MIMAT0019778	4.23942	5.56567	3.89378	4.89417	3.63715	5.12441	3.97237	5.1097	chr1:5922771-5922792 (-)	22	UUGAGGAGACAUGGUGGGGGCC
hsa-miR-4690-5p	20519498	MIMAT0019779_st	MIMAT0019779	4.33859	5.66136	4.77065	4.73588	3.63442	4.73724	4.79102	4.82623	chr11:65403781-65403802 (+)	22	GAGCAGGCGAGGCUGGGCUGAA
hsa-miR-4692	20519502	MIMAT0019783_st	MIMAT0019783	1.09293	1.04298	2.17413	1.27701	0	0	0	0.637871	chr11:72494611-72494632 (+)	22	UCAGGCAGUGUGGGUAUCAGAU
hsa-miR-4695-5p	20519507	MIMAT0019788_st	MIMAT0019788	3.05523	3.96814	4.89211	4.26612	3.62296	3.88498	4.27048	4.56763	chr1:19209744-19209765 (-)	22	CAGGAGGCAGUGGGCGAGCAGG
hsa-miR-4695-3p	20519508	MIMAT0019789_st	MIMAT0019789	1.01801	1.00831	3.63251	0	1.38458	1.56162	2.70842	1.13526	chr1:19209698-19209719 (-)	22	UGAUCUCACCGCUGCCUCCUUC
hsa-miR-4700-5p	20519515	MIMAT0019796_st	MIMAT0019796	0	1.25551	1.04495	2.34783	1.17731	0.769598	2.93483	0.474771	chr12:121161005-121161026 (+)	22	UCUGGGGAUGAGGACAGUGUGU
hsa-miR-4701-5p	20519517	MIMAT0019798_st	MIMAT0019798	1.95411	1.32579	0	0	0	1.12586	1.26841	0	chr12:49165797-49165818 (-)	22	UUGGCCACCACACCUACCCCUU
hsa-miR-4701-3p	20519518	MIMAT0019799_st	MIMAT0019799	4.48679	5.70905	5.20587	3.72383	3.17663	3.77398	6.16573	5.7159	chr12:49165763-49165782 (-)	20	AUGGGUGAUGGGUGUGGUGU
hsa-miR-4704-5p	20519521	MIMAT0019803_st	MIMAT0019803	0	0.90551	0.62069	1.65403	0	0	1.85819	0	chr13:66792391-66792412 (+)	22	GACACUAGGCAUGUGAGUGAUU
hsa-miR-4706	20519524	MIMAT0019806_st	MIMAT0019806	2.35719	4.55648	4.26967	3.24075	2.65642	3.45518	5.01464	3.35234	chr14:65511415-65511439 (+)	25	AGCGGGGAGGAAGUGGGCGCUGCUU
hsa-miR-4707-5p	20519525	MIMAT0019807_st	MIMAT0019807	3.39577	5.07526	4.85362	4.09429	3.91707	4.76928	4.27648	4.25521	chr14:23426207-23426229 (-)	23	GCCCCGGCGCGGGCGGGUUCUGG
hsa-miR-4708-5p	20519527	MIMAT0019809_st	MIMAT0019809	2.3211	3.11272	4.41887	0	1.24689	1.24509	4.23248	2.18375	chr14:65801873-65801893 (-)	21	AGAGAUGCCGCCUUGCUCCUU
hsa-miR-4709-3p	20519530	MIMAT0019812_st	MIMAT0019812	0.836637	1.30461	2.65645	0	0.957068	0.638238	3.66851	1.55229	chr14:74946838-74946860 (-)	23	UUGAAGAGGAGGUGCUCUGUAGC
hsa-miR-4710	20519533	MIMAT0019815_st	MIMAT0019815	4.23032	5.2388	5.61636	3.84437	3.25398	3.79352	5.72517	4.78264	chr14:105144060-105144077 (-)	18	GGGUGAGGGCAGGUGGUU
hsa-miR-4717-3p	20519549	MIMAT0019830_st	MIMAT0019830	4.25049	5.39347	5.06532	3.73921	2.86345	3.9303	5.49918	4.52429	chr16:2324662-2324682 (+)	21	ACACAUGGGUGGCUGUGGCCU
hsa-miR-4721	20519554	MIMAT0019835_st	MIMAT0019835	3.86047	4.88214	3.9774	3.89285	2.49395	4.1227	4.96159	1.30936	chr16:28855248-28855269 (-)	22	UGAGGGCUCCAGGUGACGGUGG
hsa-miR-4722-3p	20519556	MIMAT0019837_st	MIMAT0019837	0.419127	0	1.5898	0	1.22174	0	1.53818	0	chr16:88782686-88782707 (-)	22	ACCUGCCAGCACCUCCCUGCAG
hsa-miR-4725-5p	20519564	MIMAT0019843_st	MIMAT0019843	1.45133	1.26114	2.08714	0	0	0	1.03471	0	chr17:29902300-29902320 (+)	21	AGACCCUGCAGCCUUCCCACC
hsa-miR-4726-5p	20519566	MIMAT0019845_st	MIMAT0019845	3.64613	3.49696	3.72281	3.58536	2.30497	3.10434	4.4017	0.875021	chr17:36875944-36875966 (+)	23	AGGGCCAGAGGAGCCUGGAGUGG
hsa-miR-4728-5p	20519570	MIMAT0019849_st	MIMAT0019849	2.05771	2.01929	3.76985	3.47905	3.01429	2.65985	3.42441	3.29649	chr17:37882749-37882771 (+)	23	UGGGAGGGGAGAGGCAGCAAGCA
hsa-miR-4732-5p	20519576	MIMAT0019855_st	MIMAT0019855	1.0427	2.12042	3.42485	3.32451	1.81744	2.60727	2.94754	1.91969	chr17:27188718-27188740 (-)	23	UGUAGAGCAGGGAGCAGGAAGCU
hsa-miR-4734	20519580	MIMAT0019859_st	MIMAT0019859	2.86861	4.5768	3.84951	3.60663	2.71184	4.21929	4.04358	3.90199	chr17:36858523-36858544 (-)	22	GCUGCGGGCUGCGGUCAGGGCG
hsa-miR-4736	20519583	MIMAT0019862_st	MIMAT0019862	0.383417	1.44247	0.67541	3.13702	0.795468	2.16738	2.00219	0.583371	chr17:56413365-56413383 (-)	19	AGGCAGGUUAUCUGGGCUG
hsa-miR-3064-5p	20519585	MIMAT0019864_st	MIMAT0019864	3.8171	5.37617	4.86378	3.38575	1.03608	3.48846	5.95946	4.86336	chr17:62496935-62496955 (-)	21	UCUGGCUGUUGUGGUGUGCAA
hsa-miR-3064-3p	20519586	MIMAT0019865_st	MIMAT0019865	0	0	0	2.12467	0	0.638238	1.29975	0	chr17:62496893-62496915 (-)	23	UUGCCACACUGCAACACCUUACA
hsa-miR-4739	20519589	MIMAT0019868_st	MIMAT0019868	5.49276	7.63921	6.61886	6.55262	5.21863	7.80106	5.93525	7.83717	chr17:77681025-77681049 (-)	25	AAGGGAGGAGGAGCGGAGGGGCCCU
hsa-miR-4740-3p	20519591	MIMAT0019870_st	MIMAT0019870	0	0	1.92742	0	3.02059	1.53826	0	0	chr17:79374516-79374537 (-)	22	GCCCGAGAGGAUCCGUCCCUGC
hsa-miR-4741	20519592	MIMAT0019871_st	MIMAT0019871	1.75253	4.40378	3.19054	3.65323	2.75151	3.31939	3.62081	1.86549	chr18:20513370-20513392 (+)	23	CGGGCUGUCCGGAGGGGUCGGCU
hsa-miR-4743-5p	20519595	MIMAT0019874_st	MIMAT0019874	1.50271	0	1.29479	3.97511	2.30497	0.892248	2.9001	1.40383	chr18:46196973-46196995 (+)	23	UGGCCGGAUGGGACAGGAGGCAU
hsa-miR-3591-3p	20519599	MIMAT0019877_st	MIMAT0019877	0.583277	0.49878	0.48694	1.48796	0	0.593218	0.511176	0	chr18:56118319-56118340 (-)	22	AAACACCAUUGUCACACUCCAC
hsa-miR-4745-5p	20519600	MIMAT0019878_st	MIMAT0019878	4.23537	6.14355	4.68664	4.93574	3.70568	5.98855	3.84187	5.01121	chr19:804941-804963 (+)	23	UGAGUGGGGCUCCCGGGACGGCG
hsa-miR-4747-5p	20519604	MIMAT0019882_st	MIMAT0019882	0	0	0.71036	0	1.4502	0	0.864866	0	chr19:4932699-4932720 (+)	22	AGGGAAGGAGGCUUGGUCUUAG
hsa-miR-4749-5p	20519607	MIMAT0019885_st	MIMAT0019885	3.2866	4.24917	4.74294	4.08592	2.5929	3.19521	3.64389	2.08799	chr19:50357850-50357871 (+)	22	UGCGGGGACAGGCCAGGGCAUC
hsa-miR-4749-3p	20519608	MIMAT0019886_st	MIMAT0019886	2.43362	1.79214	0	2.87559	0	0	2.13923	0	chr19:50357889-50357908 (+)	20	CGCCCCUCCUGCCCCCACAG
hsa-miR-4750-5p	20519609	MIMAT0019887_st	MIMAT0019887	0.733467	4.66473	4.45423	3.14473	2.68	2.2246	4.23968	3.52951	chr19:50391434-50391455 (+)	22	CUCGGGCGGAGGUGGUUGAGUG
hsa-miR-4750-3p	20519610	MIMAT0022979_st	MIMAT0022979	3.39511	2.65734	0	2.77842	1.57784	2.07228	3.15321	0	chr19:50391466-50391487 (+)	22	CCUGACCCACCCCCUCCCGCAG
hsa-miR-371b-5p	20519615	MIMAT0019892_st	MIMAT0019892	0	1.3991	0.4949	1.2725	1.66633	0	0.748366	0.293201	chr19:54290969-54290990 (-)	22	ACUCAAAAGAUGGCGGCACUUU
hsa-miR-4758-5p	20519626	MIMAT0019903_st	MIMAT0019903	3.33311	4.05477	4.08513	3.78011	2.72081	3.943	3.72882	3.74062	chr20:60907590-60907612 (-)	23	GUGAGUGGGAGCCGGUGGGGCUG
hsa-miR-4758-3p	20519627	MIMAT0019904_st	MIMAT0019904	2.42298	1.57894	0	0	0	0	1.81005	0	chr20:60907546-60907568 (-)	23	UGCCCCACCUGCUGACCACCCUC
hsa-miR-4763-3p	20519636	MIMAT0019913_st	MIMAT0019913	5.67817	6.60001	6.11578	5.17532	4.32412	5.71321	6.298	6.23926	chr22:46509504-46509527 (+)	24	AGGCAGGGGCUGGUGCUGGGCGGG
hsa-miR-4767	20519642	MIMAT0019919_st	MIMAT0019919	3.98585	4.74467	3.99996	0	2.27035	4.07963	5.28799	4.0043	chrX:7065910-7065932 (+)	23	CGCGGGCGCUCCUGGCCGCCGCC
hsa-miR-4769-3p	20519646	MIMAT0019923_st	MIMAT0019923	1.02672	0.68992	0	0	1.42101	1.08168	0	0	chrX:47446875-47446896 (+)	22	UCUGCCAUCCUCCCUCCCCUAC
hsa-miR-4776-5p	20519655	MIMAT0019932_st	MIMAT0019932	1.49502	1.34167	1.96676	2.56055	0	1.04129	1.29975	0.634401	chr2:213790990-213791011 (+) /// chr2:213791030-213791051 (-)	22	GUGGACCAGGAUGGCAAGGGCU
hsa-miR-4778-5p	20519659	MIMAT0019936_st	MIMAT0019936	1.41135	0.29039	0.17589	2.50747	0.643888	0.212128	0.668716	0.767061	chr2:66585429-66585450 (-)	22	AAUUCUGUAAAGGAAGAAGAGG
hsa-miR-4436b-5p	20519663	MIMAT0019940_st	MIMAT0019940	4.66105	5.62824	5.20182	3.25392	3.40601	4.88713	5.60706	4.44374	chr2:110844067-110844088 (-) /// chr2:111042442-111042463 (+)	22	GUCCACUUCUGCCUGCCCUGCC
hsa-miR-4783-3p	20519670	MIMAT0019947_st	MIMAT0019947	0	0	3.91532	0	0	0	3.13944	1.31647	chr2:128181122-128181144 (-)	23	CCCCGGUGUUGGGGCGCGUCUGC
hsa-miR-4784	20519671	MIMAT0019948_st	MIMAT0019948	0	0.55762	2.7611	2.41611	0	0.454618	1.93624	0.832111	chr2:132248781-132248800 (-)	20	UGAGGAGAUGCUGGGACUGA
hsa-miR-4786-3p	20519678	MIMAT0019955_st	MIMAT0019955	0.531467	1.96745	1.05545	1.9685	1.23111	1.27592	2.40863	0	chr2:240882440-240882461 (-)	22	UGAAGCCAGCUCUGGUCUGGGC
hsa-miR-4787-5p	20519679	MIMAT0019956_st	MIMAT0019956	7.49401	8.65398	8.28805	7.75048	7.39574	8.46506	7.99485	8.65149	chr3:50712524-50712545 (+)	22	GCGGGGGUGGCGGCGGCAUCCC
hsa-miR-4788	20519681	MIMAT0019958_st	MIMAT0019958	0.582147	0.36938	0.82924	3.63283	0	0	0	0.487181	chr3:134156678-134156699 (+)	22	UUACGGACCAGCUAAGGGAGGC
hsa-miR-4793-3p	20519689	MIMAT0019966_st	MIMAT0019966	7.73246	8.18642	7.28192	6.68869	5.87694	6.83474	7.87643	7.27979	chr3:48681634-48681656 (-)	23	UCUGCACUGUGAGUUGGCUGGCU
hsa-miR-4797-5p	20519695	MIMAT0019972_st	MIMAT0019972	0	0	0.62675	1.92831	0	0	1.08407	0	chr3:197020790-197020810 (-)	21	GACAGAGUGCCACUUACUGAA
hsa-miR-4800-5p	20519701	MIMAT0019978_st	MIMAT0019978	3.51847	3.07114	3.43926	4.60517	3.68653	3.369	3.588	1.12413	chr4:2251854-2251874 (-)	21	AGUGGACCGAGGAAGGAAGGA
hsa-miR-5000-5p	20520196	MIMAT0021019_st	MIMAT0021019	3.65829	3.88963	1.46285	2.69013	3.60336	3.52897	3.60931	0.872651	chr2:75317962-75317983 (+)	22	CAGUUCAGAAGUGUUCCUGAGU
hsa-miR-5001-5p	20520198	MIMAT0021021_st	MIMAT0021021	5.02368	5.3813	4.92023	4.81904	4.55428	5.15532	5.02988	4.92502	chr2:233415240-233415263 (-)	24	AGGGCUGGACUCAGCGGCGGAGCU
hsa-miR-5001-3p	20520199	MIMAT0021022_st	MIMAT0021022	0.950577	1.50617	1.49048	0	1.40429	0.457578	1.82428	0.363481	chr2:233415203-233415224 (-)	22	UUCUGCCUCUGUCCAGGUCCUU
hsa-miR-5006-5p	20520208	MIMAT0021033_st	MIMAT0021033	2.97229	4.2701	3.81579	3.56953	2.92153	2.71617	3.9493	3.96468	chr13:42142491-42142511 (-)	21	UUGCCAGGGCAGGAGGUGGAA
hsa-miR-5008-5p	20520214	MIMAT0021039_st	MIMAT0021039	0.587967	1.32112	0	2.20825	0	0	2.3788	0	chr1:228129342-228129363 (-)	22	UGAGGCCCUUGGGGCACAGUGG
hsa-miR-5008-3p	20520215	MIMAT0021040_st	MIMAT0021040	1.6796	0	2.50255	0	0	0	2.0003	0	chr1:228129311-228129331 (-)	21	CCUGUGCUCCCAGGGCCUCGC
hsa-miR-5087	20520324	MIMAT0021079_st	MIMAT0021079	0.871327	0.84112	0.94522	0	1.49112	0	0.763876	0	chr1:147806646-147806668 (-)	23	GGGUUUGUAGCUUUGCUGGCAUG
hsa-miR-5088-5p	20520325	MIMAT0021080_st	MIMAT0021080	1.45192	2.06295	1.4137	2.91148	0	2.1396	2.95313	0	chr19:50185425-50185447 (+)	24	CAGGGCUCAGGGAUUGGAUGGAGG
hsa-miR-5093	20520332	MIMAT0021085_st	MIMAT0021085	4.43194	5.93019	5.97089	4.98379	3.73846	4.89627	5.86511	5.32639	chr16:85339842-85339864 (-)	23	AGGAAAUGAGGCUGGCUAGGAGC
hsa-miR-5094	20520333	MIMAT0021086_st	MIMAT0021086	1.1198	0	0.60596	0	0.727598	1.19634	0.450226	0	chr15:90393922-90393943 (-)	22	AAUCAGUGAAUGCCUUGAACCU
hsa-miR-5095	20520348	MIMAT0020600_st	MIMAT0020600	2.17791	1.82076	2.50406	2.59972	2.10137	1.9096	2.23216	1.15095	chr1:53400608-53400628 (+)	21	UUACAGGCGUGAACCACCGCG
hsa-miR-1273f	20520349	MIMAT0020601_st	MIMAT0020601	2.30548	3.98065	4.08132	2.51184	2.76466	2.87554	4.27076	2.53914	chr1:53394370-53394388 (+)	19	GGAGAUGGAGGUUGCAGUG
hsa-miR-1273g-3p	20520351	MIMAT0022742_st	MIMAT0022742	8.06111	8.57909	9.49069	7.3754	9.75107	8.74366	9.02204	9.44651	chr1:53406042-53406062 (+)	21	ACCACUGCACUCCAGCCUGAG
hsa-miR-5096	20520352	MIMAT0020603_st	MIMAT0020603	0	0	1.38352	2.03803	0	0	2.82737	0	chr4:79741918-79741938 (+)	21	GUUUCACCAUGUUGGUCAGGC
hsa-miR-5189-5p	20520568	MIMAT0021120_st	MIMAT0021120	2.15095	2.07344	2.49625	3.70832	0	2.7021	2.22038	1.74003	chr16:88535351-88535374 (+)	24	UCUGGGCACAGGCGGAUGGACAGG
hsa-miR-5189-3p	20520569	MIMAT0027088_st	MIMAT0027088	7.56196	8.86085	7.76359	7.41614	7.48808	8.17114	6.87843	7.62832	chr16:88535392-88535412 (+)	21	UGCCAACCGUCAGAGCCCAGA
hsa-miR-5194	20520574	MIMAT0021125_st	MIMAT0021125	0	0	1.81038	1.85403	0	0	1.23745	0	chr8:131020606-131020627 (-)	22	UGAGGGGUUUGGAAUGGGAUGG
hsa-miR-5195-3p	20520576	MIMAT0021127_st	MIMAT0021127	2.04993	1.43217	0	2.86429	0	0.423918	2.07351	0.594971	chr14:107259125-107259145 (-)	21	AUCCAGUUCUCUGAGGGGGCU
hsa-miR-5196-5p	20520577	MIMAT0021128_st	MIMAT0021128	0	0	3.30815	3.249	2.03615	0	0	0	chr19:35836444-35836465 (+)	22	AGGGAAGGGGACGAGGGUUGGG
hsa-miR-5571-5p	20521783	MIMAT0022257_st	MIMAT0022257	0	0.4633	1.58877	0	0.934248	0.523858	2.2133	0	chr22:23228471-23228491 (+)	21	CAAUUCUCAAAGGAGCCUCCC
hsa-miR-5100	20521785	MIMAT0022259_st	MIMAT0022259	8.23368	9.13886	8.48991	7.28645	8.00433	8.63118	8.03901	8.5187	chr10:43493078-43493099 (+)	22	UUCAGAUCCCAGCGGUGCCUCU
hsa-miR-5572	20521786	MIMAT0022260_st	MIMAT0022260	0	1.93039	4.21552	0	0	0	1.99287	1.24688	chr15:80873520-80873540 (+)	21	GUUGGGGUGCAGGGGUCUGCU
hsa-miR-548as-5p	20521806	MIMAT0022267_st	MIMAT0022267	0.223067	1.28693	1.19934	0	0	0.352458	1.33575	0.171141	chr13:93142416-93142437 (+)	22	AAAAGUAAUUGCGGGUUUUGCC
hsa-miR-664b-3p	20521811	MIMAT0022272_st	MIMAT0022272	1.73489	1.26575	3.03179	0	1.7503	1.78947	1.69462	0.518271	chrX:153996910-153996931 (+)	22	UUCAUUUGCCUCCCAGCCUACA
hsa-miR-5580-3p	20521813	MIMAT0022274_st	MIMAT0022274	0	0	1.15438	2.49962	0	0	1.49444	0	chr14:54415145-54415166 (-)	22	CACAUAUGAAGUGAGCCAGCAC
hsa-miR-5589-5p	20521836	MIMAT0022297_st	MIMAT0022297	0	0	1.8333	0	0	0.464508	1.75251	0.772511	chr19:10149030-10149050 (+)	21	GGCUGGGUGCUCUUGUGCAGU
hsa-miR-5698	20522033	MIMAT0022491_st	MIMAT0022491	0.883117	0.47798	2.50255	1.94496	0	0	2.05182	0.434971	chr1:154077038-154077059 (-)	22	UGGGGGAGUGCAGUGAUUGUGG
hsa-miR-5699-5p	20522034	MIMAT0027103_st	MIMAT0027103	0.749967	0.35821	2.57691	3.34758	2.05226	1.07416	1.07068	0	chr10:687688-687709 (-)	22	UGCCCCAACAAGGAAGGACAAG
hsa-miR-5739	20522180	MIMAT0023116_st	MIMAT0023116	1.42875	0.91597	1.6079	3.5313	0	0	1.45706	0	chr22:28855913-28855932 (+)	20	GCGGAGAGAGAAUGGGGAGC
hsa-miR-5787	20522537	MIMAT0023252_st	MIMAT0023252	6.52562	8.06526	7.89132	7.26145	6.575	7.89349	5.62485	7.16822	chr3:50264870-50264889 (+)	20	GGGCUGGGGCGCGGGGAGGU
hsa-miR-6068	20523000	MIMAT0023693_st	MIMAT0023693	1.20657	2.88763	0	0	2.28338	2.55244	2.17486	1.41837	chr1:63792635-63792655 (-)	21	CCUGCGAGUCUCCGGCGGUGG
hsa-miR-6069	20523001	MIMAT0023694_st	MIMAT0023694	0	0	2.8083	0	1.64945	0	1.88176	0	chr22:35732761-35732781 (-)	21	GGGCUAGGGCCUGCUGCCCCC
hsa-miR-6075	20523007	MIMAT0023700_st	MIMAT0023700	0	0	1.02831	2.80337	0.616988	1.32109	0.532426	0	chr5:1510882-1510902 (-)	21	ACGGCCCAGGCGGCAUUGGUG
hsa-miR-6076	20523008	MIMAT0023701_st	MIMAT0023701	0	0.0117003	0.4352	1.94893	0	0	0.649956	0.633801	chr14:50433117-50433137 (+)	21	AGCAUGACAGAGGAGAGGUGG
hsa-miR-6083	20523015	MIMAT0023708_st	MIMAT0023708	0.820077	1.80463	1.8273	2.11533	0	1.07847	3.70618	0.776671	chr3:124093255-124093274 (+)	20	CUUAUAUCAGAGGCUGUGGG
hsa-miR-6084	20523016	MIMAT0023709_st	MIMAT0023709	0.916927	1.78504	0	0	0	0	2.99403	0	chr1:20960249-20960268 (+)	20	UUCCGCCAGUCGGUGGCCGG
hsa-miR-6085	20523017	MIMAT0023710_st	MIMAT0023710	1.35011	3.5272	4.91855	4.22396	3.32689	3.75594	3.03713	3.17243	chr15:62635310-62635328 (+)	19	AAGGGGCUGGGGGAGCACA
hsa-miR-6086	20523018	MIMAT0023711_st	MIMAT0023711	0.912757	2.50179	3.2082	3.69671	1.90881	1.38875	2.96174	2.6334	chrX:13608412-13608431 (+)	20	GGAGGUUGGGAAGGGCAGAG
hsa-miR-6087	20523019	MIMAT0023712_st	MIMAT0023712	7.76801	9.29704	9.1986	8.45881	8.48381	9.41747	8.63307	9.17058	chrX:108297774-108297791 (+)	18	UGAGGCGGGGGGGCGAGC
hsa-miR-6088	20523020	MIMAT0023713_st	MIMAT0023713	7.81659	9.31091	7.67283	8.32012	7.47677	9.40072	7.47022	8.52765	chr19:45939912-45939931 (+)	20	AGAGAUGAAGCGGGGGGGCG
hsa-miR-6089	20523021	MIMAT0023714_st	MIMAT0023714	9.01521	10.0222	8.8803	8.88429	8.58797	9.87227	8.9938	9.48381	chrX:2527270-2527293 (+) /// chrY:2477270-2477293 (+)	24	GGAGGCCGGGGUGGGGCGGGGCGG
hsa-miR-6090	20523022	MIMAT0023715_st	MIMAT0023715	9.44176	10.7001	9.27913	9.46098	8.79142	10.3399	8.95493	9.84927	chr11:128392325-128392343 (+)	19	GGGGAGCGAGGGGCGGGGC
hsa-miR-6124	20524034	MIMAT0024597_st	MIMAT0024597	0.683057	3.50698	3.67887	4.58742	2.5393	1.67295	3.59954	2.5095	chr11:12185239-12185258 (+)	20	GGGAAAAGGAAGGGGGAGGA
hsa-miR-6125	20524035	MIMAT0024598_st	MIMAT0024598	7.22095	7.99701	7.73722	7.02826	7.13755	7.73521	7.46127	7.80826	chr12:62654199-62654218 (+)	20	GCGGAAGGCGGAGCGGCGGA
hsa-miR-6126	20524036	MIMAT0024599_st	MIMAT0024599	3.19367	5.96761	4.59232	5.36123	3.89168	4.98804	1.72362	3.55487	chr16:3535422-3535439 (-)	18	GUGAAGGCCCGGCGGAGA
hsa-miR-6127	20524047	MIMAT0024610_st	MIMAT0024610	3.76076	4.85918	4.94516	4.48325	3.37317	3.58983	5.02489	4.33849	chr1:22959821-22959839 (-)	19	UGAGGGAGUGGGUGGGAGG
hsa-miR-6132	20524053	MIMAT0024616_st	MIMAT0024616	0	0.33955	1.93948	2.41611	1.7503	0.0600278	1.32033	0.560621	chr7:116660285-116660303 (+)	19	AGCAGGGCUGGGGAUUGCA
hsa-miR-6133	20524054	MIMAT0024617_st	MIMAT0024617	0.947677	0.99587	2.73406	2.11511	0	0.969298	1.03471	0.487351	chr7:132975705-132975723 (+)	19	UGAGGGAGGAGGUUGGGUA
hsa-miR-6165	20524250	MIMAT0024782_st	MIMAT0024782	3.09745	3.88963	4.23345	4.38139	3.11174	2.81029	4.18732	3.60189	chr17:47588187-47588205 (+)	19	CAGCAGGAGGUGAGGGGAG
hsa-miR-6500-3p	20525000	MIMAT0025455_st	MIMAT0025455	0	0.52685	0	1.69577	0	0	1.03471	0	chr1:51525744-51525764 (+)	21	ACACUUGUUGGGAUGACCUGC
hsa-miR-6509-5p	20525019	MIMAT0025474_st	MIMAT0025474	1.04001	1.69338	1.82444	2.67493	0	2.26019	2.11667	0.835121	chr7:134891796-134891816 (-)	21	AUUAGGUAGUGGCAGUGGAAC
hsa-miR-6510-5p	20525021	MIMAT0025476_st	MIMAT0025476	0	0.88631	3.03606	3.40234	0.784058	0	1.58952	0	chr17:39673446-39673467 (-)	22	CAGCAGGGGAGAGAGAGGAGUC
hsa-miR-6511a-5p	20525023	MIMAT0025478_st	MIMAT0025478	0	1.66867	3.08765	3.27817	3.19192	0	3.51461	2.31864	chr16:15019798-15019820 (+) /// chr16:16418449-16418471 (+) /// chr16:16462737-16462759 (+) /// chr16:18437910-18437932 (-)	23	CAGGCAGAAGUGGGGCUGACAGG
hsa-miR-6511a-3p	20525024	MIMAT0025479_st	MIMAT0025479	3.26123	2.20737	1.30971	0	3.50263	3.1163	2.46031	1.88035	chr16:15019837-15019858 (+) /// chr16:16418488-16418509 (+) /// chr16:16462776-16462797 (+) /// chr16:18437872-18437893 (-)	22	CCUCACCAUCCCUUCUGCCUGC
hsa-miR-6515-5p	20525031	MIMAT0025486_st	MIMAT0025486	0	0.42909	2.45854	2.36209	0	0.0560878	2.53935	0.410721	chr19:13051300-13051320 (+)	21	UUGGAGGGUGUGGAAGACAUC
hsa-miR-6515-3p	20525032	MIMAT0025487_st	MIMAT0025487	0.999977	0.84705	0	0	1.263	0.920048	1.61538	0.303441	chr19:13051335-13051354 (+)	20	UCUCUUCAUCUACCCCCCAG
hsa-miR-6715a-3p	20525380	MIMAT0025841_st	MIMAT0025841	1.6796	2.93653	2.28023	0.631852	1.90298	0.966728	3.79297	1.61668	chr10:114059418-114059438 (+)	21	CCAAACCAGUCGUGCCUGUGG
hsa-miR-6715b-3p	20525382	MIMAT0025843_st	MIMAT0025843	2.31609	3.88963	2.33635	0	1.57579	2.51347	4.06538	0.635921	chr10:114059380-114059401 (-)	22	CUCAAACCGGCUGUGCCUGUGG
hsa-miR-6716-5p	20525383	MIMAT0025844_st	MIMAT0025844	0.409047	2.13952	2.13438	3.80228	2.04632	2.22035	1.52542	0.482151	chr11:118514733-118514752 (+)	20	UGGGAAUGGGGGUAAGGGCC
hsa-miR-6716-3p	20525384	MIMAT0025845_st	MIMAT0025845	4.08222	3.16143	0.80794	2.34084	3.21802	4.34149	2.00958	0	chr11:118514766-118514787 (+)	22	UCCGAACUCUCCAUUCCUCUGC
hsa-miR-6511b-5p	20525386	MIMAT0025847_st	MIMAT0025847	1.75023	3.43948	3.82791	3.39286	3.08944	2.79638	3.14754	3.66701	chr16:2156721-2156744 (-)	24	CUGCAGGCAGAAGUGGGGCUGACA
hsa-miR-6511b-3p	20525387	MIMAT0025848_st	MIMAT0025848	3.02403	3.1135	0	0	0	2.15997	2.7819	1.14088	chr16:2156680-2156702 (-)	23	CCUCACCACCCCUUCUGCCUGCA
hsa-miR-6722-5p	20525393	MIMAT0025853_st	MIMAT0025853	2.46178	1.98798	2.66129	3.0945	1.0106	1.13551	0	0	chr9:139641393-139641412 (-)	20	AGGCGCACCCGACCACAUGC
hsa-miR-6722-3p	20525394	MIMAT0025854_st	MIMAT0025854	2.84777	4.08213	4.91482	3.8275	2.99967	4.01407	4.38672	4.4825	chr9:139641355-139641376 (-)	22	UGCAGGGGUCGGGUGGGCCAGG
hsa-miR-6723-5p	20525395	MIMAT0025855_st	MIMAT0025855	3.8829	3.81567	3.8473	3.76512	3.27824	3.63832	4.15509	1.71921	chr1:567762-567783 (-)	22	AUAGUCCGAGUAACGUCGGGGC
hsa-miR-6724-5p	20525396	MIMAT0025856_st	MIMAT0025856	6.13945	6.91556	5.70903	6.03091	5.59501	6.85795	5.91984	6.26294	---	23	CUGGGCCCGCGGCGGGCGUGGGG
hsa-miR-6726-5p	20525414	MIMAT0027353_st	MIMAT0027353	1.44064	2.07703	2.92674	0	0	0	2.26523	0	chr1:1231525-1231545 (-)	21	CGGGAGCUGGGGUCUGCAGGU
hsa-miR-6727-5p	20525416	MIMAT0027355_st	MIMAT0027355	6.47708	7.4264	7.44779	6.56678	6.25745	7.4558	6.74428	7.13987	chr1:1247919-1247941 (-)	23	CUCGGGGCAGGCGGCUGGGAGCG
hsa-miR-6728-5p	20525418	MIMAT0027357_st	MIMAT0027357	0	0	1.24889	3.16607	0	0	0	0.682681	chr1:8926622-8926644 (-)	23	UUGGGAUGGUAGGACCAGAGGGG
hsa-miR-6729-5p	20525420	MIMAT0027359_st	MIMAT0027359	7.04587	7.78238	7.59834	6.78367	6.72905	7.51464	6.96041	7.49676	chr1:12089220-12089241 (+)	22	UGGGCGAGGGCGGCUGAGCGGC
hsa-miR-6730-5p	20525422	MIMAT0027361_st	MIMAT0027361	0	0.14618	0	1.78818	0	0	1.22898	0.670691	chr1:12639024-12639046 (-)	23	AGAAAGGUGGAGGGGUUGUCAGA
hsa-miR-6730-3p	20525423	MIMAT0027362_st	MIMAT0027362	0.869697	0.66302	0	0	0	0	1.5637	0	chr1:12638986-12639007 (-)	22	CCUGACACCCCAUCUGCCCUCA
hsa-miR-6731-3p	20525425	MIMAT0027364_st	MIMAT0027364	1.17749	0.87853	1.02811	0	0	1.12866	1.74939	0	chr1:25245836-25245856 (-)	21	UCUAUUCCCCACUCUCCCCAG
hsa-miR-6732-5p	20525426	MIMAT0027365_st	MIMAT0027365	7.02871	7.80634	7.57032	6.44304	6.35705	6.86164	7.54927	7.50411	chr1:37945836-37945855 (+)	20	UAGGGGGUGGCAGGCUGGCC
hsa-miR-6734-5p	20525430	MIMAT0027369_st	MIMAT0027369	0	0	1.18467	2.42575	0	0	2.08773	0	chr1:43830359-43830381 (-)	23	UUGAGGGGAGAAUGAGGUGGAGA
hsa-miR-6735-5p	20525432	MIMAT0027371_st	MIMAT0027371	0	0	1.90999	3.05146	1.54449	0	0	0	chr1:43914215-43914239 (+)	25	CAGGGCAGAGGGCACAGGAAUCUGA
hsa-miR-6736-5p	20525434	MIMAT0027373_st	MIMAT0027373	2.27943	3.04175	3.1529	3.03253	0	0.859718	3.25063	1.84557	chr1:145584428-145584448 (+)	21	CUGGGUGAGGGCAUCUGUGGU
hsa-miR-6737-3p	20525437	MIMAT0027376_st	MIMAT0027376	1.81131	1.23104	0	0	0	0.748008	1.25663	0	chr1:153934827-153934848 (-)	22	UCUGUGCUUCACCCCUACCCAG
hsa-miR-6741-5p	20525444	MIMAT0027383_st	MIMAT0027383	3.86633	4.99798	5.48452	3.55286	2.51976	3.5971	5.37063	4.35026	chr1:226109816-226109837 (-)	22	GUGGGUGCUGGUGGGAGCCGUG
hsa-miR-6743-5p	20525448	MIMAT0027387_st	MIMAT0027387	3.95547	5.23804	5.80096	4.64804	4.32376	4.54648	5.32272	5.13716	chr11:209341-209362 (+)	22	AAGGGGCAGGGACGGGUGGCCC
hsa-miR-6743-3p	20525449	MIMAT0027388_st	MIMAT0027388	1.15793	0	0	0	1.50202	0	1.24496	0	chr11:209383-209405 (+)	23	AGCCGCUCUUCUCCCUGCCCACA
hsa-miR-6746-5p	20525453	MIMAT0027392_st	MIMAT0027392	2.15618	2.90457	3.55945	2.74639	2.29741	2.12789	3.78683	2.94841	chr11:61645724-61645745 (-)	22	CCGGGAGAAGGAGGUGGCCUGG
hsa-miR-6747-3p	20525456	MIMAT0027395_st	MIMAT0027395	0.508547	0.94258	2.15926	0	1.45514	0.901728	0	0	chr11:62334483-62334503 (-)	21	UCCUGCCUUCCUCUGCACCAG
hsa-miR-6749-5p	20525459	MIMAT0027398_st	MIMAT0027398	4.16917	4.39528	4.75518	4.38961	3.892	4.08577	3.97681	3.20748	chr11:64669901-64669922 (-)	22	UCGGGCCUGGGGUUGGGGGAGC
hsa-miR-6750-5p	20525461	MIMAT0027400_st	MIMAT0027400	2.10663	2.54325	2.77665	3.03883	1.79495	1.98233	2.6498	1.20653	chr11:64665881-64665904 (-)	24	CAGGGAACAGCUGGGUGAGCUGCU
hsa-miR-6751-5p	20525463	MIMAT0027402_st	MIMAT0027402	0.786137	2.71459	3.19619	0	1.72594	2.74357	3.72463	2.01331	chr11:64897423-64897445 (-)	23	UUGGGGGUGAGGUUGGUGUCUGG
hsa-miR-6752-5p	20525465	MIMAT0027404_st	MIMAT0027404	4.85893	5.56869	5.42247	4.59163	4.10759	5.12927	4.83443	4.75291	chr11:67257721-67257742 (+)	22	GGGGGGUGUGGAGCCAGGGGGC
hsa-miR-6753-5p	20525467	MIMAT0027406_st	MIMAT0027406	2.45957	3.84431	3.62615	3.30815	2.40145	2.58149	3.85853	2.32413	chr11:67812261-67812282 (+)	22	CACCAGGGCAGAGCAGGGCUGA
hsa-miR-6753-3p	20525468	MIMAT0027407_st	MIMAT0027407	2.7113	4.7555	4.94782	0	2.94828	3.28049	4.72601	3.99213	chr11:67812399-67812420 (+)	22	UGGUCUGUCUCUGCCCUGGCAC
hsa-miR-6754-5p	20525469	MIMAT0027408_st	MIMAT0027408	0	1.44723	1.29786	0	0	0	2.07972	0	chr11:71184554-71184575 (+)	22	CCAGGGAGGCUGGUUUGGAGGA
hsa-miR-6754-3p	20525470	MIMAT0027409_st	MIMAT0027409	3.16761	4.39529	4.3074	2.2441	1.99126	3.27686	4.53558	3.37603	chr11:71184592-71184613 (+)	22	UCUUCACCUGCCUCUGCCUGCA
hsa-miR-6756-5p	20525473	MIMAT0027412_st	MIMAT0027412	4.98965	6.32556	6.22918	5.22339	4.85685	5.272	6.67868	6.31748	chr11:119183695-119183717 (-)	23	AGGGUGGGGCUGGAGGUGGGGCU
hsa-miR-6757-5p	20525475	MIMAT0027414_st	MIMAT0027414	0.521617	0.63495	3.00365	2.70887	0	0	2.43574	0.730781	chr12:53450733-53450754 (+)	22	UAGGGAUGGGAGGCCAGGAUGA
hsa-miR-6760-5p	20525481	MIMAT0027420_st	MIMAT0027420	0	0	0	3.1767	0.631628	0	1.29974	0	chr12:111741951-111741973 (+)	23	CAGGGAGAAGGUGGAAGUGCAGA
hsa-miR-6762-5p	20525485	MIMAT0027424_st	MIMAT0027424	0	1.23272	1.60963	2.76848	0	0	2.81073	0	chr12:113729333-113729355 (+)	23	CGGGGCCAUGGAGCAGCCUGUGU
hsa-miR-6763-5p	20525487	MIMAT0027426_st	MIMAT0027426	3.07879	4.90439	4.52134	3.78514	2.94828	3.22589	4.22679	4.08537	chr12:133158588-133158606 (+)	19	CUGGGGAGUGGCUGGGGAG
hsa-miR-6765-5p	20525491	MIMAT0027430_st	MIMAT0027430	4.28802	5.67479	5.46235	4.43821	4.08332	5.42993	5.68806	5.06652	chr14:105617177-105617201 (-)	25	GUGAGGCGGGGCCAGGAGGGUGUGU
hsa-miR-6766-3p	20525494	MIMAT0027433_st	MIMAT0027433	1.37757	0.57187	0	0	0	0	1.4786	0	chr15:89869973-89869994 (-)	22	UGAUUGUCUUCCCCCACCCUCA
hsa-miR-6769a-5p	20525499	MIMAT0027438_st	MIMAT0027438	1.84842	3.53132	3.88647	2.87672	2.7918	2.3346	4.29619	3.97224	chr16:4721324-4721344 (+)	21	AGGUGGGUAUGGAGGAGCCCU
hsa-miR-6771-5p	20525503	MIMAT0027442_st	MIMAT0027442	3.17714	4.32814	4.63327	4.07581	3.03085	3.94912	3.69526	3.68714	chr16:50326532-50326553 (+)	22	CUCGGGAGGGCAUGGGCCAGGC
hsa-miR-6772-5p	20525505	MIMAT0027444_st	MIMAT0027444	1.71152	3.11882	2.01129	2.44272	1.57439	3.20222	3.8194	2.28335	chr16:57806238-57806259 (-)	22	UGGGUGUAGGCUGGAGCUGAGG
hsa-miR-6772-3p	20525506	MIMAT0027445_st	MIMAT0027445	0.972887	3.33974	2.71206	0	0.957068	2.3941	4.08514	1.36786	chr16:57806202-57806224 (-)	23	UUGCUCCUGACUCUGUGCCCACA
hsa-miR-6775-5p	20525511	MIMAT0027450_st	MIMAT0027450	5.9344	6.78529	7.00615	5.93785	6.17325	6.14466	7.01541	6.98388	chr16:87868237-87868261 (-)	25	UCGGGGCAUGGGGGAGGGAGGCUGG
hsa-miR-6776-5p	20525513	MIMAT0027452_st	MIMAT0027452	1.99906	4.00422	4.51917	3.1181	0.584118	2.07462	4.32393	2.74893	chr17:2596190-2596208 (-)	19	UCUGGGUGCAGUGGGGGUU
hsa-miR-6777-5p	20525515	MIMAT0027454_st	MIMAT0027454	2.91146	4.61401	4.01867	3.90969	2.778	3.75846	4.95183	3.59751	chr17:17716832-17716854 (-)	23	ACGGGGAGUCAGGCAGUGGUGGA
hsa-miR-6778-5p	20525517	MIMAT0027456_st	MIMAT0027456	2.79146	4.49465	4.80798	4.57923	3.93125	2.88778	5.03597	4.63952	chr17:18244174-18244195 (-)	22	AGUGGGAGGACAGGAGGCAGGU
hsa-miR-6779-5p	20525519	MIMAT0027458_st	MIMAT0027458	4.03141	4.63182	5.72358	3.872	4.3997	3.90394	4.81064	4.55544	chr17:37071237-37071257 (+)	21	CUGGGAGGGGCUGGGUUUGGC
hsa-miR-6781-5p	20525523	MIMAT0027462_st	MIMAT0027462	0	1.3726	1.56448	3.4651	0	0	2.35169	0	chr17:40975936-40975956 (-)	21	CGGGCCGGAGGUCAAGGGCGU
hsa-miR-6784-5p	20525529	MIMAT0027468_st	MIMAT0027468	1.8041	1.7282	3.09824	2.76848	0	0	3.23885	0	chr17:43191777-43191796 (-)	20	GCCGGGGCUUUGGGUGAGGG
hsa-miR-6784-3p	20525530	MIMAT0027469_st	MIMAT0027469	2.21539	1.43775	0	0	1.08261	0.933748	2.11931	0	chr17:43191735-43191756 (-)	22	UCUCACCCCAACUCUGCCCCAG
hsa-miR-6785-5p	20525531	MIMAT0027470_st	MIMAT0027470	3.62824	5.58789	5.04526	3.75046	2.79925	4.13068	5.65233	4.15269	chr17:73494634-73494655 (+)	22	UGGGAGGGCGUGGAUGAUGGUG
hsa-miR-6786-5p	20525533	MIMAT0027472_st	MIMAT0027472	5.73198	7.09055	6.74134	6.30791	5.84057	7.25316	5.58627	6.73892	chr17:79660839-79660859 (+)	21	GCGGUGGGGCCGGAGGGGCGU
hsa-miR-6787-5p	20525535	MIMAT0027474_st	MIMAT0027474	4.29718	5.28953	4.19421	4.35162	3.4044	4.3119	4.92187	3.68364	chr17:80194549-80194570 (+)	22	UGGCGGGGGUAGAGCUGGCUGC
hsa-miR-6787-3p	20525536	MIMAT0027475_st	MIMAT0027475	0	0	1.74293	0	0	0	1.54417	1.01694	chr17:80194583-80194604 (+)	22	UCUCAGCUGCUGCCCUCUCCAG
hsa-miR-6789-5p	20525539	MIMAT0027478_st	MIMAT0027478	4.20017	6.20694	5.04766	5.22228	3.85947	6.06882	3.16552	5.14085	chr19:2235898-2235921 (-)	24	GUAGGGGCGUCCCGGGCGCGCGGG
hsa-miR-6789-3p	20525540	MIMAT0027479_st	MIMAT0027479	0	0	0	0	4.26762	4.08577	4.1153	3.22268	chr19:2235828-2235848 (-)	21	CGGCGCCCGUGUCUCCUCCAG
hsa-miR-6790-5p	20525541	MIMAT0027480_st	MIMAT0027480	1.17197	3.06471	3.29216	1.86537	1.55755	1.11473	2.11471	1.35955	chr19:6392972-6392994 (-)	23	GUGAGUGUGGAUUUGGCGGGGUU
hsa-miR-6791-5p	20525543	MIMAT0027482_st	MIMAT0027482	5.58912	6.41636	5.99976	5.4718	4.85134	5.76331	5.93784	5.89976	chr19:6736763-6736784 (-)	22	CCCCUGGGGCUGGGCAGGCGGA
hsa-miR-6792-5p	20525545	MIMAT0027484_st	MIMAT0027484	1.18994	2.20975	1.10924	2.49288	0	0.979968	3.23885	1.38198	chr19:7682325-7682345 (+)	21	GUAAGCAGGGGCUCUGGGUGA
hsa-miR-6793-5p	20525547	MIMAT0027486_st	MIMAT0027486	1.07039	2.46694	2.78189	0	0	0.817438	3.56494	0.688711	chr19:10939654-10939675 (+)	22	UGUGGGUUCUGGGUUGGGGUGA
hsa-miR-6793-3p	20525548	MIMAT0027487_st	MIMAT0027487	2.93956	2.61286	0	0	0	1.95428	1.91501	0	chr19:10939692-10939711 (+)	20	UCCCCAACCCCUGCCCGCAG
hsa-miR-6794-5p	20525549	MIMAT0027488_st	MIMAT0027488	2.00756	3.27412	3.97362	4.2869	2.6967	2.96423	4.11976	3.12824	chr19:12963079-12963098 (+)	20	CAGGGGGACUGGGGGUGAGC
hsa-miR-6795-5p	20525551	MIMAT0027490_st	MIMAT0027490	2.08867	1.92656	2.93136	3.32668	0	1.95868	3.81952	1.3586	chr19:15290133-15290156 (-)	24	UGGGGGGACAGGAUGAGAGGCUGU
hsa-miR-6796-5p	20525553	MIMAT0027492_st	MIMAT0027492	4.78447	5.60708	3.96355	3.82348	2.05287	4.04394	5.04097	3.5378	chr19:40875758-40875780 (+)	23	UUGUGGGGUUGGAGAGCUGGCUG
hsa-miR-6796-3p	20525554	MIMAT0027493_st	MIMAT0027493	0.895327	0.99178	0	0	1.47748	0	1.29975	0	chr19:40875794-40875814 (+)	21	GAAGCUCUCCCCUCCCCGCAG
hsa-miR-6797-5p	20525555	MIMAT0027494_st	MIMAT0027494	0	0	2.4688	3.18723	0	0	1.54307	0	chr19:42373702-42373726 (+)	25	AGGAGGGAAGGGGCUGAGAACAGGA
hsa-miR-6797-3p	20525556	MIMAT0027495_st	MIMAT0027495	2.02802	2.26823	0	0	1.62215	1.53627	1.52969	0.472931	chr19:42373745-42373766 (+)	22	UGCAUGACCCUUCCCUCCCCAC
hsa-miR-6798-5p	20525557	MIMAT0027496_st	MIMAT0027496	0	3.47598	3.59599	3.15252	2.24428	0	2.63465	1.32989	chr19:49513168-49513190 (+)	23	CCAGGGGGAUGGGCGAGCUUGGG
hsa-miR-6798-3p	20525558	MIMAT0027497_st	MIMAT0027497	2.50451	1.82307	1.65658	0	0	1.26173	1.78528	0.659141	chr19:49513209-49513229 (+)	21	CUACCCCCCAUCCCCCUGUAG
hsa-miR-6799-5p	20525559	MIMAT0027498_st	MIMAT0027498	4.35887	5.60386	5.62006	4.55112	4.13416	4.87425	5.74345	5.1907	chr19:50295128-50295147 (+)	20	GGGGAGGUGUGCAGGGCUGG
hsa-miR-6800-5p	20525561	MIMAT0027500_st	MIMAT0027500	4.49977	5.93442	3.91532	4.96036	4.45937	5.76369	4.75077	5.28635	chr19:50335279-50335299 (+)	21	GUAGGUGACAGUCAGGGGCGG
hsa-miR-6800-3p	20525562	MIMAT0027501_st	MIMAT0027501	3.12624	2.73758	0	2.72363	1.67434	2.86225	2.93066	0	chr19:50335333-50335353 (+)	21	CACCUCUCCUGGCAUCGCCCC
hsa-miR-6802-5p	20525565	MIMAT0027504_st	MIMAT0027504	0	0	2.44607	2.13958	1.77742	0.666948	0	0	chr19:55751320-55751339 (-)	20	CUAGGUGGGGGGCUUGAAGC
hsa-miR-6802-3p	20525566	MIMAT0027505_st	MIMAT0027505	1.84842	1.12897	0	0	0	0.809058	1.08382	0.406661	chr19:55751280-55751301 (-)	22	UUCACCCCUCUCACCUAAGCAG
hsa-miR-6803-5p	20525567	MIMAT0027506_st	MIMAT0027506	6.16115	7.22572	6.9181	6.19832	5.85644	6.8549	6.63838	6.76121	chr19:55756592-55756613 (-)	22	CUGGGGGUGGGGGGCUGGGCGU
hsa-miR-6803-3p	20525568	MIMAT0027507_st	MIMAT0027507	0.724507	0.78561	1.54671	0	1.09804	0	1.38332	0	chr19:55756554-55756575 (-)	22	UCCCUCGCCUUCUCACCCUCAG
hsa-miR-6804-5p	20525569	MIMAT0027508_st	MIMAT0027508	0	1.32874	0.97303	2.74063	1.48443	0	2.06492	0	chr19:55742295-55742315 (-)	21	UGAGGGUGUCAGCAGGUGACG
hsa-miR-6804-3p	20525570	MIMAT0027509_st	MIMAT0027509	1.95046	1.10613	1.51054	0	0	0	2.34696	0	chr19:55742253-55742274 (-)	22	CGCACCUGCCUCUCACCCACAG
hsa-miR-6805-5p	20525571	MIMAT0027510_st	MIMAT0027510	2.59024	4.31686	4.73937	3.57705	2.28849	4.28042	3.72064	2.98359	chr19:55899554-55899575 (+)	22	UAGGGGGCGGCUUGUGGAGUGU
hsa-miR-6805-3p	20525572	MIMAT0027511_st	MIMAT0027511	2.73007	2.10705	0	0	2.20195	0	2.08532	0	chr19:55899588-55899610 (+)	23	UUGCUCUGCUCCCCCGCCCCCAG
hsa-miR-6806-5p	20525573	MIMAT0027512_st	MIMAT0027512	0	0	1.51789	0	0	0	1.34549	0.821431	chr19:58846059-58846082 (+)	24	UGUAGGCAUGAGGCAGGGCCCAGG
hsa-miR-6806-3p	20525574	MIMAT0027513_st	MIMAT0027513	4.14218	4.24014	3.00365	3.1485	4.19991	4.34149	3.63788	3.80544	chr19:58846096-58846117 (+)	22	UGAAGCUCUGACAUUCCUGCAG
hsa-miR-6807-5p	20525575	MIMAT0027514_st	MIMAT0027514	3.98556	5.91352	4.68007	4.90557	4.53888	4.96775	4.72811	3.64498	chr19:59061652-59061673 (+)	22	GUGAGCCAGUGGAAUGGAGAGG
hsa-miR-6807-3p	20525576	MIMAT0027515_st	MIMAT0027515	0	0	0	0	3.25171	2.4699	3.86751	2.76012	chr19:59061721-59061743 (+)	23	CACUGCAUUCCUGCUUGGCCCAG
hsa-miR-6808-5p	20525577	MIMAT0027516_st	MIMAT0027516	0	3.00748	4.08513	3.64669	2.48219	2.5963	3.47663	3.03952	chr1:1275062-1275083 (-)	22	CAGGCAGGGAGGUGGGACCAUG
hsa-miR-6808-3p	20525578	MIMAT0027517_st	MIMAT0027517	5.38605	5.62385	5.56434	3.78193	5.35459	5.52899	4.95243	5.52431	chr1:1275030-1275050 (-)	21	GUGUGACCACCGUUCCUGCAG
hsa-miR-6812-5p	20525585	MIMAT0027524_st	MIMAT0027524	5.90222	6.53324	6.02402	5.71714	5.3523	5.70659	6.68731	6.55178	chr20:44054155-44054179 (+)	25	AUGGGGUGAGAUGGGGAGGAGCAGC
hsa-miR-6814-5p	20525589	MIMAT0027528_st	MIMAT0027528	0	0.64762	2.1215	2.30746	0	1.56756	2.13454	0	chr21:43166975-43166996 (-)	22	UCCCAAGGGUGAGAUGCUGCCA
hsa-miR-6816-5p	20525593	MIMAT0027532_st	MIMAT0027532	3.31734	4.97857	5.27369	4.5271	2.78035	5.108	2.92009	5.0241	chr22:20102249-20102269 (-)	21	UGGGGCGGGGCAGGUCCCUGC
hsa-miR-6817-5p	20525595	MIMAT0027534_st	MIMAT0027534	0	0.86245	0.93944	2.23089	1.67462	0	2.19745	0.516931	chr22:25851618-25851641 (+)	24	UCUGCCAUAGGAAGCUUGGAGUGG
hsa-miR-6819-5p	20525599	MIMAT0027538_st	MIMAT0027538	2.04579	3.35633	4.79375	3.70614	3.14471	2.44412	3.61442	3.94192	chr22:36682927-36682948 (-)	22	UUGGGGUGGAGGGCCAAGGAGC
hsa-miR-6819-3p	20525600	MIMAT0027539_st	MIMAT0027539	1.5098	0.98924	0	0	1.58395	0	0.974876	0.363641	chr22:36682893-36682913 (-)	21	AAGCCUCUGUCCCCACCCCAG
hsa-miR-6820-5p	20525601	MIMAT0027540_st	MIMAT0027540	0	1.37982	1.46267	2.46808	1.01357	1.08688	1.72757	0.759441	chr22:38363575-38363593 (+)	19	UGCGGCAGAGCUGGGGUCA
hsa-miR-6821-5p	20525603	MIMAT0027542_st	MIMAT0027542	5.08873	5.79746	5.11973	4.81933	4.29418	5.32695	4.86632	5.19526	chr22:50356514-50356536 (+)	23	GUGCGUGGUGGCUCGAGGCGGGG
hsa-miR-6822-3p	20525606	MIMAT0027545_st	MIMAT0027545	0.671417	0	0.91851	0	0	0	1.72775	0	chr3:39179733-39179756 (+)	24	AGGCUCUAACUGGCUUUCCCUGCA
hsa-miR-6824-5p	20525609	MIMAT0027548_st	MIMAT0027548	1.2942	1.98089	2.40297	0	0	1.08474	1.88699	0	chr3:48671105-48671126 (-)	22	GUAGGGGAGGUUGGGCCAGGGA
hsa-miR-6825-5p	20525611	MIMAT0027550_st	MIMAT0027550	0	1.41029	3.50485	2.17384	0	0.638238	2.09986	0.756271	chr3:127294148-127294169 (-)	22	UGGGGAGGUGUGGAGUCAGCAU
hsa-miR-6827-5p	20525615	MIMAT0027554_st	MIMAT0027554	0	1.97363	2.9696	2.78562	0	1.73452	3.22013	1.54884	chr3:134086678-134086699 (-)	22	UGGGAGCCAUGAGGGUCUGUGC
hsa-miR-6830-5p	20525621	MIMAT0027560_st	MIMAT0027560	0.568947	1.07319	1.14996	2.67458	1.29069	0	0	0.629031	chr5:131553585-131553606 (-)	22	CCAAGGAAGGAGGCUGGACAUC
hsa-miR-6831-5p	20525623	MIMAT0027562_st	MIMAT0027562	5.38016	5.89147	5.71868	4.97491	4.87423	4.91731	6.14098	6.19465	chr5:139943312-139943335 (-)	24	UAGGUAGAGUGUGAGGAGGAGGUC
hsa-miR-6833-5p	20525627	MIMAT0027566_st	MIMAT0027566	0.702367	0.21317	0.6564	2.26307	1.26482	0.687458	1.74946	0.437521	chr6:32147598-32147619 (+)	22	GUGUGGAAGAUGGGAGGAGAAA
hsa-miR-6780b-5p	20525633	MIMAT0027572_st	MIMAT0027572	1.6811	3.61376	4.08486	4.61398	2.3101	2.78859	2.24736	0.911571	chr6:43402285-43402307 (+)	23	UGGGGAAGGCUUGGCAGGGAAGA
hsa-miR-6836-3p	20525636	MIMAT0027575_st	MIMAT0027575	2.05894	0	0	2.89348	0	2.23736	2.63247	0	chr7:2297150-2297170 (-)	21	AUGCCUCCCCCGGCCCCGCAG
hsa-miR-6837-5p	20525637	MIMAT0027576_st	MIMAT0027576	0	0.6854	1.01366	1.99107	0	0	0	0	chr7:44091370-44091390 (+)	21	ACCAGGGCCAGCAGGGAAUGU
hsa-miR-6840-3p	20525644	MIMAT0027583_st	MIMAT0027583	1.51704	1.69358	0	2.81089	0	0	3.54218	0.479931	chr7:99954319-99954340 (+)	22	GCCCAGGACUUUGUGCGGGGUG
hsa-miR-6841-3p	20525646	MIMAT0027585_st	MIMAT0027585	0	0.50863	0.622	0	1.17748	0	0	0	chr8:24811310-24811330 (-)	21	ACCUUGCAUCUGCAUCCCCAG
hsa-miR-6845-5p	20525651	MIMAT0027590_st	MIMAT0027590	0	1.01349	1.88963	3.26067	0	0	0	1.00033	chr8:144919965-144919983 (-)	19	CGGGGCCAGAGCAGAGAGC
hsa-miR-6846-5p	20525653	MIMAT0027592_st	MIMAT0027592	1.22295	1.77422	4.04501	2.71541	0	1.33029	3.27856	1.01773	chr8:145112257-145112278 (-)	22	UGGGGGCUGGAUGGGGUAGAGU
hsa-miR-6847-5p	20525655	MIMAT0027594_st	MIMAT0027594	4.10011	5.28501	3.30576	4.11603	3.34884	3.97928	5.19985	3.70048	chr8:145134782-145134804 (+)	23	ACAGAGGACAGUGGAGUGUGAGC
hsa-miR-6848-5p	20525657	MIMAT0027596_st	MIMAT0027596	0	0	3.53314	0	0	0	2.72971	1.81261	chr8:145540951-145540973 (-)	23	UGGGGGCUGGGAUGGGCCAUGGU
hsa-miR-6849-5p	20525659	MIMAT0027598_st	MIMAT0027598	4.47484	5.78897	5.12762	3.57044	2.76206	4.16147	6.42911	5.55751	chr8:145625712-145625734 (-)	23	GAGUGGAUAGGGGAGUGUGUGGA
hsa-miR-6850-5p	20525661	MIMAT0027600_st	MIMAT0027600	6.11221	6.78654	5.95952	5.52232	4.82268	6.45295	6.12505	6.08574	chr8:146017355-146017376 (-)	22	GUGCGGAACGCUGGCCGGGGCG
hsa-miR-6855-5p	20525671	MIMAT0027610_st	MIMAT0027610	0	0	1.25044	0	0	0	1.47831	0.663191	chr9:132631889-132631913 (+)	25	UUGGGGUUUGGGGUGCAGACAUUGC
hsa-miR-6855-3p	20525672	MIMAT0027611_st	MIMAT0027611	0.913027	0.35628	0	0	0.909178	0	0.661096	0	chr9:132631929-132631950 (+)	22	AGACUGACCUUCAACCCCACAG
hsa-miR-6856-5p	20525673	MIMAT0027612_st	MIMAT0027612	3.95861	5.28277	4.45682	3.05548	3.00504	4.07076	5.40787	4.48214	chr9:133501689-133501712 (+)	24	AAGAGAGGAGCAGUGGUGCUGUGG
hsa-miR-6858-5p	20525677	MIMAT0027616_st	MIMAT0027616	5.06624	6.19592	6.19828	5.29998	4.82811	5.47048	5.9262	5.98939	chrX:153678668-153678689 (+)	22	GUGAGGAGGGGCUGGCAGGGAC
hsa-miR-6858-3p	20525678	MIMAT0027617_st	MIMAT0027617	1.58005	1.65199	0	0	0	0	2.25194	0	chrX:153678709-153678730 (+)	22	CAGCCAGCCCCUGCUCACCCCU
hsa-miR-6859-5p	20525679	MIMAT0027618_st	MIMAT0027618	0	0.44811	1.92952	2.76233	0	0	1.51343	0	chr1:17409-17431 (-)	23	GAGAGGAACAUGGGCUCAGGACA
hsa-miR-6859-3p	20525680	MIMAT0027619_st	MIMAT0027619	0	0.74113	1.40128	0	1.02918	0	1.15145	0	chr1:17369-17391 (-)	23	UGACCCCCAUGUCGCCUCUGUAG
hsa-miR-6769b-5p	20525681	MIMAT0027620_st	MIMAT0027620	2.75389	2.59067	4.93593	4.11433	3.37173	3.03576	4.20422	3.76238	chr1:206648151-206648173 (+)	23	UGGUGGGUGGGGAGGAGAAGUGC
hsa-miR-6860	20525683	MIMAT0027622_st	MIMAT0027622	1.99128	4.04211	3.69985	2.96316	1.64474	3.07481	5.2546	3.87932	chr11:66813154-66813175 (+)	22	ACUGGGCAGGGCUGUGGUGAGU
hsa-miR-6861-5p	20525684	MIMAT0027623_st	MIMAT0027623	2.4219	3.3883	3.30815	3.13466	1.67928	2.78106	3.10341	2.03839	chr12:112601099-112601120 (-)	22	ACUGGGUAGGUGGGGCUCCAGG
hsa-miR-6865-5p	20525691	MIMAT0027630_st	MIMAT0027630	0	2.20593	3.55191	3.00832	1.24453	1.12861	3.17557	2.90227	chr17:4873418-4873440 (-)	23	UAGGUGGCAGAGGAGGGACUUCA
hsa-miR-6865-3p	20525692	MIMAT0027631_st	MIMAT0027631	0.747487	0.82922	0	0	0.626458	0	0	0	chr17:4873386-4873406 (-)	21	ACACCCUCUUUCCCUACCGCC
hsa-miR-6869-5p	20525699	MIMAT0027638_st	MIMAT0027638	6.97792	8.15151	6.72464	6.7925	6.66251	7.89445	9.50676	9.54856	chr20:1373584-1373605 (-)	22	GUGAGUAGUGGCGCGCGGCGGC
hsa-miR-6870-5p	20525701	MIMAT0027640_st	MIMAT0027640	0.433157	0.28789	2.93513	1.87322	1.68	0	1.29974	0.437521	chr20:10630320-10630338 (-)	19	UGGGGGAGAUGGGGGUUGA
hsa-miR-6871-5p	20525703	MIMAT0027642_st	MIMAT0027642	1.82278	3.33525	2.8866	1.77976	0.975908	1.08823	3.78632	1.97009	chr20:39797668-39797689 (+)	22	CAUGGGAGUUCGGGGUGGUUGC
hsa-miR-6875-3p	20525712	MIMAT0027651_st	MIMAT0027651	3.30043	5.3861	6.36572	2.58436	3.22655	3.8574	5.24717	4.3023	chr7:100465702-100465723 (+)	22	AUUCUUCCUGCCCUGGCUCCAU
hsa-miR-6877-5p	20525715	MIMAT0027654_st	MIMAT0027654	0.947677	0	2.72388	3.34857	0	0	2.82804	0	chr9:135927388-135927409 (+)	22	AGGGCCGAAGGGUGGAAGCUGC
hsa-miR-6877-3p	20525716	MIMAT0027655_st	MIMAT0027655	2.97027	3.67509	5.61574	1.82004	2.99171	3.73765	4.30074	4.06368	chr9:135927422-135927442 (+)	21	CAGCCUCUGCCCUUGGCCUCC
hsa-miR-6879-5p	20525719	MIMAT0027658_st	MIMAT0027658	3.10022	3.94208	4.46959	4.31009	3.36395	3.23936	4.42944	3.11296	chr11:64785982-64786003 (+)	22	CAGGGCAGGGAAGGUGGGAGAG
hsa-miR-6879-3p	20525720	MIMAT0027659_st	MIMAT0027659	1.92023	1.61895	0	0	1.48846	1.12936	1.23814	0	chr11:64786022-64786042 (+)	21	UGUCACCCGCUCCUUGCCCAG
hsa-miR-6880-5p	20525721	MIMAT0027660_st	MIMAT0027660	1.01884	3.41903	4.77437	4.05563	3.33217	3.79379	4.32374	4.02389	chr12:124821762-124821783 (-)	22	UGGUGGAGGAAGAGGGCAGCUC
hsa-miR-6883-5p	20525727	MIMAT0027666_st	MIMAT0027666	2.22107	3.75322	3.34174	3.02341	1.65277	0.776688	4.02699	2.23161	chr17:8048363-8048384 (-)	22	AGGGAGGGUGUGGUAUGGAUGU
hsa-miR-6886-5p	20525733	MIMAT0027672_st	MIMAT0027672	0	0.83988	0	3.05082	0	0	1.82445	1.14521	chr19:11224155-11224175 (+)	21	CCCGCAGGUGAGAUGAGGGCU
hsa-miR-6886-3p	20525734	MIMAT0027673_st	MIMAT0027673	0.763377	2.14327	2.61741	0	0.866268	1.42773	2.21429	0	chr19:11224187-11224207 (+)	21	UGCCCUUCUCUCCUCCUGCCU
hsa-miR-6887-5p	20525735	MIMAT0027674_st	MIMAT0027674	0	0	1.5898	2.71541	0	0	1.42552	0	chr19:35613609-35613631 (+)	23	UGGGGGGACAGAUGGAGAGGACA
hsa-miR-6889-3p	20525740	MIMAT0027679_st	MIMAT0027679	0.887427	0.93546	0.50721	0	0	0.591048	0.748366	0	chr22:41648996-41649015 (-)	20	UCUGUGCCCCUACUUCCCAG
hsa-miR-6890-5p	20525741	MIMAT0027680_st	MIMAT0027680	0	0	1.36225	2.78385	0	0	0	0.507201	chr3:49137322-49137342 (-)	21	CAUGGGGUAGGGCAGAGUAGG
hsa-miR-6890-3p	20525742	MIMAT0027681_st	MIMAT0027681	0.728017	0.47751	0	0	1.32222	1.11076	1.60826	0	chr3:49137287-49137306 (-)	20	CCACUGCCUAUGCCCCACAG
hsa-miR-6891-5p	20525743	MIMAT0027682_st	MIMAT0027682	3.04007	2.69283	3.82151	4.07651	2.24929	2.47956	2.76171	2.9178	chr6:31323074-31323092 (-)	19	UAAGGAGGGGGAUGAGGGG
hsa-miR-6892-3p	20525746	MIMAT0027685_st	MIMAT0027685	1.50271	1.29773	0	0	0	1.03776	1.89809	0	chr7:143079873-143079893 (+)	21	UCCCUCUCCCACCCCUUGCAG
hsa-miR-6893-5p	20525747	MIMAT0027686_st	MIMAT0027686	2.82263	4.69544	4.55882	3.8761	2.32658	3.63832	5.03626	3.8162	chr8:145660977-145660997 (-)	21	CAGGCAGGUGUAGGGUGGAGC
hsa-miR-6893-3p	20525748	MIMAT0027687_st	MIMAT0027687	1.31103	2.44322	2.30226	0	1.74572	0	1.74946	1.13347	chr8:145660934-145660955 (-)	22	CCCUGCUGCCUUCACCUGCCAG
hsa-miR-6894-5p	20525749	MIMAT0027688_st	MIMAT0027688	2.3494	1.89294	3.30278	3.05629	2.40736	3.02452	2.83602	2.45658	chrX:53228099-53228122 (-)	24	AGGAGGAUGGAGAGCUGGGCCAGA
hsa-miR-7107-5p	20526172	MIMAT0028111_st	MIMAT0028111	6.13715	6.55055	6.71607	6.30684	5.97403	5.79081	6.55284	6.67222	chr12:121882129-121882150 (-)	22	UCGGCCUGGGGAGGAGGAAGGG
hsa-miR-7108-5p	20526174	MIMAT0028113_st	MIMAT0028113	4.7526	5.66637	5.45531	4.85437	4.86986	5.45491	5.35005	5.58572	chr19:2434978-2434998 (-)	21	GUGUGGCCGGCAGGCGGGUGG
hsa-miR-7108-3p	20526175	MIMAT0028114_st	MIMAT0028114	1.0894	1.3892	0	0	0	1.14869	0	0	chr19:2434912-2434931 (-)	20	ACCCGCCCGUCUCCCCACAG
hsa-miR-7109-5p	20526176	MIMAT0028115_st	MIMAT0028115	1.42404	1.35808	4.18111	3.19517	2.41635	2.37249	3.88563	2.95671	chr22:32017492-32017512 (-)	21	CUGGGGGGAGGAGACCCUGCU
hsa-miR-7110-5p	20526178	MIMAT0028117_st	MIMAT0028117	2.11996	3.81739	4.38505	3.72453	3.2208	3.64011	4.36092	2.80835	chr3:122880646-122880666 (+)	21	UGGGGGUGUGGGGAGAGAGAG
hsa-miR-7113-5p	20526184	MIMAT0028123_st	MIMAT0028123	0.763377	3.70348	1.17168	1.95613	1.19475	1.74456	4.18113	2.02393	chr11:67800332-67800352 (+)	21	UCCAGGGAGACAGUGUGUGAG
hsa-miR-7114-5p	20526186	MIMAT0028125_st	MIMAT0028125	4.24073	5.71573	5.32663	4.07385	3.45194	4.37522	6.07468	5.10905	chr9:140344513-140344533 (-)	21	UCUGUGGAGUGGGGUGCCUGU
hsa-miR-7114-3p	20526187	MIMAT0028126_st	MIMAT0028126	2.64312	2.47625	0	0	0	1.27465	1.98391	1.55753	chr9:140344478-140344498 (-)	21	UGACCCACCCCUCUCCACCAG
hsa-miR-7150	20526861	MIMAT0028211_st	MIMAT0028211	0.495877	1.47278	3.3315	3.30418	0.907928	0	2.04782	0.492201	chr9:126247863-126247880 (-)	18	CUGGCAGGGGGAGAGGUA
hsa-miR-7152-3p	20526865	MIMAT0028215_st	MIMAT0028215	0.673297	0	0	3.19231	0	0	1.03575	0	chr10:73550538-73550557 (+)	20	UCUGGUCCUGGACAGGAGGC
hsa-miR-7158-5p	20526876	MIMAT0028226_st	MIMAT0028226	1.03827	1.77486	0	0	0	0	2.38923	0	chr2:6114794-6114817 (+)	24	GGCUCAAUCUCUGGUCCUGCAGCC
hsa-miR-7160-5p	20526882	MIMAT0028230_st	MIMAT0028230	0	2.40325	2.43377	0	0	1.69666	2.49215	1.09537	chr8:2024669-2024689 (+)	21	UGCUGAGGUCCGGGCUGUGCC
hsa-miR-7162-3p	20526885	MIMAT0028235_st	MIMAT0028235	4.7073	4.88943	4.86044	4.81697	4.78002	4.48639	4.77292	4.84758	chr10:30657526-30657544 (-)	19	UCUGAGGUGGAACAGCAGC
hsa-miR-7641	20528493	MIMAT0029782_st	MIMAT0029782	3.81993	3.1268	4.70625	2.348	4.58264	3.25863	3.67726	2.38632	chr11:104123325-104123343 (+)	19	UUGAUCUCGGAAGCUAAGC
hsa-miR-7704	20528733	MIMAT0030019_st	MIMAT0030019	7.5123	8.98422	8.25883	8.19417	7.49396	9.17694	7.26829	8.70086	chr2:177053571-177053589 (+)	19	CGGGGUCGGCGGCGACGUG
hsa-miR-7706	20528735	MIMAT0030021_st	MIMAT0030021	0	0	0	0	2.4214	0.439408	1.64847	0.787311	chr15:85923870-85923893 (+)	24	UGAAGCGCCUGUGCUCUGCCGAGA
hsa-miR-4433b-5p	20529130	MIMAT0030413_st	MIMAT0030413	2.06785	2.25503	0.97731	0	1.02239	0.499698	2.57061	0.454061	chr2:64567943-64567963 (-)	21	AUGUCCCACCCCCACUCCUGU
hsa-miR-4433b-3p	20529131	MIMAT0030414_st	MIMAT0030414	3.1996	4.49915	4.821	4.50042	4.37914	4.24389	4.68691	4.9588	chr2:64567903-64567923 (-)	21	CAGGAGUGGGGGGUGGGACGU
hsa-miR-1273h-5p	20529132	MIMAT0030415_st	MIMAT0030415	4.16342	4.96172	5.77545	3.78834	1.70024	3.69331	4.62566	4.31064	chr16:24214469-24214489 (+)	21	CUGGGAGGUCAAGGCUGCAGU
hsa-miR-1273h-3p	20529133	MIMAT0030416_st	MIMAT0030416	2.74759	4.1846	3.53715	3.49998	2.16203	0	1.53818	0	chr16:24214507-24214528 (+)	22	CUGCAGACUCGACCUCCCAGGC
hsa-miR-6516-5p	20529134	MIMAT0030417_st	MIMAT0030417	1.36422	1.66118	0.99495	2.61125	0	0.520708	2.96327	0.348121	chr17:75085510-75085531 (+)	22	UUUGCAGUAACAGGUGUGAGCA
hsa-miR-7844-5p	20529136	MIMAT0030419_st	MIMAT0030419	3.8112	5.30764	4.43905	3.32912	2.84162	4.22626	6.04553	5.02938	chr12:94965082-94965103 (-)	22	AAAACUAGGACUGUGUGGUGUA
hsa-miR-7845-5p	20529137	MIMAT0030420_st	MIMAT0030420	1.51269	2.5158	3.29049	3.6043	1.5898	2.07977	2.39398	0.910451	chr2:208031126-208031146 (+)	21	AAGGGACAGGGAGGGUCGUGG
hsa-miR-7847-3p	20529139	MIMAT0030422_st	MIMAT0030422	7.72165	8.08	7.91239	7.16787	7.45098	7.34968	8.37779	8.38067	chr11:1901335-1901355 (+)	21	CGUGGAGGACGAGGAGGAGGC
hsa-miR-7850-5p	20529142	MIMAT0030425_st	MIMAT0030425	0.727377	3.59666	1.76988	2.33571	0	2.20848	3.52223	1.13526	chr19:2630721-2630741 (+)	21	GUUUGGACAUAGUGUGGCUGG
hsa-miR-7854-3p	20529146	MIMAT0030429_st	MIMAT0030429	0	0	0.87309	1.73997	0	0	1.34865	0	chr16:81567547-81567567 (+)	21	UGAGGUGACCGCAGAUGGGAA
hsa-miR-7974	20529565	MIMAT0031177_st	MIMAT0031177	0.583277	0	1.73105	0	0	0	1.60735	0	chr19:11606359-11606382 (-)	24	AGGCUGUGAUGCUCUCCUGAGCCC
hsa-miR-7975	20529566	MIMAT0031178_st	MIMAT0031178	3.00544	3.34137	3.12684	3.70936	2.78139	2.7822	3.62188	1.51325	chr19:55634593-55634610 (-)	18	AUCCUAGUCACGGCACCA
hsa-miR-7977	20529568	MIMAT0031180_st	MIMAT0031180	6.78	7.35759	7.77615	6.00752	6.5039	6.68523	6.92916	6.8382	chr3:176232891-176232908 (+)	18	UUCCCAGCCAACGCACCA
hsa-miR-8060	20529770	MIMAT0030987_st	MIMAT0030987	2.99787	3.08834	3.0028	3.85	3.06404	3.02626	3.48828	2.35412	chr3:96078850-96078873 (+)	24	CCAUGAAGCAGUGGGUAGGAGGAC
hsa-miR-8063	20529773	MIMAT0030990_st	MIMAT0030990	1.67949	3.33216	0.93359	2.3295	0.933388	1.43655	2.45618	0.677451	chr15:37265032-37265053 (-)	22	UCAAAAUCAGGAGUCGGGGCUU
hsa-miR-8064	20529774	MIMAT0030991_st	MIMAT0030991	0.409047	1.80359	1.39183	3.91554	0	0.982578	1.36814	0.437521	chr3:52880539-52880558 (-)	20	AGCACACUGAGCGAGCGGAC
hsa-miR-8069	20529779	MIMAT0030996_st	MIMAT0030996	6.84234	8.48501	6.97564	7.41488	6.53986	8.50381	6.77014	7.97525	chr21:15096563-15096585 (+)	23	GGAUGGUUGGGGGCGGUCGGCGU
hsa-miR-8071	20529781	MIMAT0030998_st	MIMAT0030998	5.31456	7.33189	6.32391	6.12038	4.9414	5.66601	6.22769	5.70387	chr14:106087488-106087507 (+)	20	CGGUGGACUGGAGUGGGUGG
hsa-miR-8072	20529782	MIMAT0030999_st	MIMAT0030999	4.07325	5.60708	6.63433	5.30467	4.84602	5.56372	4.97215	5.60985	chr12:123849361-123849380 (-)	20	GGCGGCGGGGAGGUAGGCAG
hsa-miR-8073	20529783	MIMAT0031000_st	MIMAT0031000	0	0	1.82686	2.30004	0	0	2.83743	0.838371	chr13:110993315-110993336 (+)	22	ACCUGGCAGCAGGGAGCGUCGU
hsa-miR-8074	20529784	MIMAT0031001_st	MIMAT0031001	1.03674	0.30318	0	3.19969	0	0	1.3888	0	chr19:51710195-51710218 (-)	24	CUAUGGCGAGACUGGCAUGUACUC
hsa-miR-8075	20529785	MIMAT0031002_st	MIMAT0031002	5.60427	5.64129	6.35383	4.71457	5.46572	5.37093	5.85972	5.63082	chr13:113917280-113917303 (+)	24	UGCUGAUGGCAGAUGUCGGGUCUG
hsa-miR-8079	20529789	MIMAT0031006_st	MIMAT0031006	0	1.88196	2.00208	0	0	0.401578	3.18323	0	chr13:44770307-44770326 (-)	20	CAGUGAUCGUCUCUGCUGGC
hsa-miR-8085	20529795	MIMAT0031012_st	MIMAT0031012	4.76218	4.86985	4.41314	3.81711	2.65067	3.91956	5.31005	4.04878	chr19:45261924-45261944 (+)	21	UGGGAGAGAGGACUGUGAGGC
hsa-miR-8089	20529799	MIMAT0031016_st	MIMAT0031016	2.90288	4.4209	4.29212	3.81071	2.87004	3.35547	3.65201	3.60693	chr5:180470413-180470436 (-)	24	CCUGGGGACAGGGGAUUGGGGCAG
