# Supplementary material for: Ikaros Regulates microRNA Networks in Acute Lymphoblastic Leukemia
Source: Preprints.org preprint supplement (doi:10.20944/preprints202208.0323.v1), 2022-08-17
Supplement: Supplementary file 2 [file supplementary]

| IK-bound miRs:      | Log2FC direction |
|---------------------|------------------|
| <i>hsa-miR-1237</i> | up               |
| <i>hsa-miR-4488</i> | up               |
| <i>hsa-miR-4674</i> | up               |
| <i>hsa-miR-4739</i> | up               |
| <i>hsa-miR-6789</i> | up               |
| <i>hsa-miR-6800</i> | up               |
| <i>hsa-miR-551a</i> | down             |
| <i>hsa-miR-1244</i> | down             |
| <i>hsa-miR-4722</i> | down             |
