# Supplementary material for: Ikaros Regulates microRNA Networks in Acute Lymphoblastic Leukemia
Source: Preprints.org preprint supplement (doi:10.20944/preprints202208.0323.v1), 2022-08-17
Supplement: Supplementary file 3 [file TableS2.xlsx]

## Sheet: Table S2
Table S2: Differential miRNA expression analysis with IK1 induction compared to CON
name	AID	baseMeanLog2	log2FoldChange	padj
hsa-let-7e-5p	MIMAT0000066	2.30785	-1.23893	0.0175471
hsa-miR-26b-5p	MIMAT0000083	1.42718	-1.40238	0.0209756
hsa-miR-92a-1-5p	MIMAT0004507	6.50629	-1.25845	0.0451656
hsa-miR-150-3p	MIMAT0004610	2.25598	2.66053	0.0202862
hsa-miR-130b-5p	MIMAT0004680	1.45967	-1.48757	0.0397774
hsa-miR-551a	MIMAT0003214	2.13027	-2.17652	0.0033262
hsa-miR-663a	MIMAT0003326	5.41647	1.83389	0.0481038
hsa-miR-1237-5p	MIMAT0022946	6.36719	1.50347	0.0373403
hsa-miR-1244	MIMAT0005896	2.38888	-1.79648	0.0316745
hsa-miR-1469	MIMAT0007347	8.44173	1.97033	0.0395673
hsa-miR-3178	MIMAT0015055	6.24156	3.73139	0.00107739
hsa-miR-3196	MIMAT0015080	6.47462	1.70137	0.0163806
hsa-miR-3663-3p	MIMAT0018085	5.30161	2.2846	0.0107969
hsa-miR-4488	MIMAT0019022	6.28741	1.46103	0.0383413
hsa-miR-4497	MIMAT0019032	7.36015	2.37372	0.00146178
hsa-miR-4516	MIMAT0019053	7.04306	1.8337	0.00294908
hsa-miR-4530	MIMAT0019069	5.42302	1.2591	0.0284775
hsa-miR-4649-5p	MIMAT0019711	3.91794	1.58085	0.0329239
hsa-miR-4674	MIMAT0019756	2.96878	2.79522	0.031868
hsa-miR-4689	MIMAT0019778	4.55458	1.23781	0.000584213
hsa-miR-4722-3p	MIMAT0019837	0.596105	-1.19221	0.00451049
hsa-miR-4739	MIMAT0019868	6.63694	1.64114	0.00893136
hsa-miR-4745-5p	MIMAT0019878	4.81858	1.40238	0.0109778
hsa-miR-5008-3p	MIMAT0021040	0.772805	-1.54561	0.0291818
hsa-miR-6069	MIMAT0023694	0.792438	-1.58488	0.0350546
hsa-miR-6088	MIMAT0023713	8.24948	1.28075	0.00416408
hsa-miR-6789-5p	MIMAT0027478	4.86396	1.59152	0.0160639
hsa-miR-6800-5p	MIMAT0027500	4.94626	1.0799	0.00889569
hsa-miR-7641	MIMAT0029782	3.48823	-1.41658	0.00718705
hsa-miR-7704	MIMAT0030019	8.1987	1.13071	0.00980622
hsa-miR-8069	MIMAT0030996	7.43837	1.31275	0.00298834
