# Supplementary material for: Ikaros Regulates microRNA Networks in Acute Lymphoblastic Leukemia
Source: Preprints.org preprint supplement (doi:10.20944/preprints202208.0323.v1), 2022-08-17
Supplement: Supplementary file 5 [file TableS4.xlsx]

## Sheet: IK1 downregulated miRNA targets
ID	Accession	Target	Experiment	Literature(PMID)
hsa-mir-26b-5p	MIMAT0000083	MARCH1	Microarray	19088304
hsa-mir-26b-5p	MIMAT0000083	MARCH2	Microarray	19088304
hsa-mir-26b-5p	MIMAT0000083	MARCH3	Microarray	19088304
hsa-let-7e-5p	MIMAT0000066	MARCH5	CLASH	23622248
hsa-mir-4722-3p	MIMAT0019837	MARCH7	HITS-CLIP	23824327
hsa-mir-26b-5p	MIMAT0000083	SEPT7	Microarray	19088304
hsa-mir-26b-5p	MIMAT0000083	SEPT14	HITS-CLIP	23824327
hsa-mir-4722-3p	MIMAT0019837	SEPT14	HITS-CLIP	23824327
hsa-mir-26b-5p	MIMAT0000083	DEC1	Microarray	19088304
hsa-mir-26b-5p	MIMAT0000083	AAMDC	Microarray	19088304
hsa-mir-130b-5p	MIMAT0004680	AAMP	CLASH	23622248
hsa-mir-26b-5p	MIMAT0000083	ABCA1	Immunoblot//Luciferase reporter assay//Microarray//qRT-PCR	22673513|19088304
hsa-mir-26b-5p	MIMAT0000083	ABCA6	Microarray	19088304
hsa-mir-26b-5p	MIMAT0000083	ABCB6	Microarray	19088304
hsa-mir-26b-5p	MIMAT0000083	ABCD1	Microarray	19088304
hsa-mir-4722-3p	MIMAT0019837	ABCD2	HITS-CLIP	19536157
hsa-mir-26b-5p	MIMAT0000083	ABCD4	Microarray	19088304
hsa-mir-26b-5p	MIMAT0000083	ABCF1	Microarray	19088304
hsa-mir-26b-5p	MIMAT0000083	ABCG2	Microarray	19088304
hsa-mir-26b-5p	MIMAT0000083	ABCG4	Microarray	19088304
hsa-mir-130b-5p	MIMAT0004680	ABCG5	HITS-CLIP	19536157
hsa-mir-4722-3p	MIMAT0019837	ABCG8	PAR-CLIP	27292025
hsa-mir-92a-1-5p	MIMAT0004507	ABHD14A-ACY1	HITS-CLIP	23313552
hsa-let-7e-5p	MIMAT0000066	ABHD17C	PAR-CLIP	20371350
hsa-mir-26b-5p	MIMAT0000083	ABHD2	HITS-CLIP	22473208
hsa-mir-1244	MIMAT0005896	ABHD2	PAR-CLIP	21572407
hsa-mir-130b-5p	MIMAT0004680	ABI2	HITS-CLIP	23824327
hsa-mir-4722-3p	MIMAT0019837	ABL2	HITS-CLIP//PAR-CLIP	23824327|27292025
hsa-let-7e-5p	MIMAT0000066	ABT1	HITS-CLIP//PAR-CLIP	23592263|24398324|21572407|23313552|27292025
hsa-mir-26b-5p	MIMAT0000083	ACAA2	Microarray	19088304
hsa-mir-4722-3p	MIMAT0019837	ACAD8	HITS-CLIP	23824327
hsa-mir-26b-5p	MIMAT0000083	ACADM	Microarray	19088304
hsa-mir-26b-5p	MIMAT0000083	ACADS	Microarray	19088304
hsa-mir-26b-5p	MIMAT0000083	ACADSB	Microarray	19088304
hsa-mir-26b-5p	MIMAT0000083	ACBD3	Microarray	19088304
hsa-mir-26b-5p	MIMAT0000083	ACBD5	HITS-CLIP	23313552
hsa-mir-4722-3p	MIMAT0019837	ACBD7	HITS-CLIP	23824327
hsa-mir-26b-5p	MIMAT0000083	ACE2	Microarray	19088304
hsa-let-7e-5p	MIMAT0000066	ACER2	PAR-CLIP	24398324
hsa-mir-1244	MIMAT0005896	ACER2	PAR-CLIP	24398324
hsa-mir-130b-5p	MIMAT0004680	ACER3	HITS-CLIP	23824327
hsa-mir-4722-3p	MIMAT0019837	ACO1	HITS-CLIP	23824327
hsa-let-7e-5p	MIMAT0000066	ACOT9	PAR-CLIP	23592263|23446348
hsa-mir-26b-5p	MIMAT0000083	ACOX2	Microarray	19088304
hsa-mir-26b-5p	MIMAT0000083	ACSF2	Microarray	19088304
hsa-mir-26b-5p	MIMAT0000083	ACSL3	HITS-CLIP	22473208
hsa-let-7e-5p	MIMAT0000066	ACTA1	PAR-CLIP	21572407
hsa-mir-26b-5p	MIMAT0000083	ACTR5	Microarray	19088304
hsa-mir-26b-5p	MIMAT0000083	ACTR8	Microarray	19088304
hsa-mir-26b-5p	MIMAT0000083	ACVR1B	CLASH	23622248
hsa-mir-92a-1-5p	MIMAT0004507	ACY1	HITS-CLIP	23313552
hsa-mir-26b-5p	MIMAT0000083	ADAM17	PAR-CLIP	24398324
hsa-mir-26b-5p	MIMAT0000083	ADAM18	Microarray	19088304
hsa-mir-26b-5p	MIMAT0000083	ADAM29	Microarray	19088304
hsa-mir-26b-5p	MIMAT0000083	ADAM9	Microarray	19088304
hsa-mir-26b-5p	MIMAT0000083	ADAMTS1	Microarray	19088304
hsa-mir-26b-5p	MIMAT0000083	ADAMTS12	Microarray	19088304
hsa-mir-130b-5p	MIMAT0004680	ADAMTS18	HITS-CLIP	27418678
hsa-mir-26b-5p	MIMAT0000083	ADAP2	Microarray	19088304
hsa-mir-26b-5p	MIMAT0000083	ADARB1	Sequencing	20371350
hsa-mir-7641	MIMAT0029782	ADCYAP1	HITS-CLIP	19536157
hsa-mir-4722-3p	MIMAT0019837	ADD1	PAR-CLIP	27292025
hsa-mir-26b-5p	MIMAT0000083	ADGB	Microarray	19088304
hsa-mir-26b-5p	MIMAT0000083	ADGRE5	Microarray	19088304
hsa-mir-26b-5p	MIMAT0000083	ADGRG6	Microarray	19088304
hsa-mir-26b-5p	MIMAT0000083	ADGRG7	PAR-CLIP	26701625
hsa-mir-26b-5p	MIMAT0000083	ADGRL2	Microarray	19088304
hsa-let-7e-5p	MIMAT0000066	ADH5	HITS-CLIP//PAR-CLIP	23313552|26701625|27292025
hsa-mir-26b-5p	MIMAT0000083	ADI1	Microarray	19088304
hsa-let-7e-5p	MIMAT0000066	ADIPOR2	PAR-CLIP	21572407
hsa-mir-26b-5p	MIMAT0000083	ADM	PAR-CLIP//Sequencing	20371350|23592263|23446348|22012620|21572407|26701625
hsa-mir-26b-5p	MIMAT0000083	ADM2	HITS-CLIP	23824327
hsa-mir-26b-5p	MIMAT0000083	ADNP	Microarray	19088304
hsa-mir-26b-5p	MIMAT0000083	ADPGK	Microarray	19088304
hsa-mir-130b-5p	MIMAT0004680	ADPRH	HITS-CLIP	23824327
hsa-mir-130b-5p	MIMAT0004680	ADPRHL2	CLASH	23622248
hsa-mir-26b-5p	MIMAT0000083	ADRA2A	Microarray	19088304
hsa-let-7e-5p	MIMAT0000066	AEBP2	CLASH	23622248
hsa-mir-26b-5p	MIMAT0000083	AEN	Microarray	19088304
hsa-mir-26b-5p	MIMAT0000083	AFAP1	Microarray	19088304
hsa-mir-26b-5p	MIMAT0000083	AGL	Microarray	19088304
hsa-let-7e-5p	MIMAT0000066	AGMAT	CLASH	23622248
hsa-mir-26b-5p	MIMAT0000083	AGMAT	Microarray	19088304
hsa-mir-4722-3p	MIMAT0019837	AGMO	HITS-CLIP	23824327
hsa-let-7e-5p	MIMAT0000066	AGO1	CLASH//Immunohistochemistry//Immunoprecipitaion//Luciferase reporter assay//Northern blot//qRT-PCR//Western blot	23622248|23426184
hsa-let-7e-5p	MIMAT0000066	AGO2	CLASH	23622248
hsa-mir-92a-1-5p	MIMAT0004507	AGO2	PAR-CLIP	23592263
hsa-mir-4722-3p	MIMAT0019837	AGO4	PAR-CLIP	27292025
hsa-mir-130b-5p	MIMAT0004680	AGPAT1	HITS-CLIP	23824327
hsa-mir-26b-5p	MIMAT0000083	AGPAT3	Sequencing	20371350
hsa-mir-26b-5p	MIMAT0000083	AGPAT5	PAR-CLIP	23592263
hsa-mir-26b-5p	MIMAT0000083	AGT	Microarray	19088304
hsa-mir-26b-5p	MIMAT0000083	AGTPBP1	HITS-CLIP//PAR-CLIP	23824327|27292025
hsa-mir-4722-3p	MIMAT0019837	AGTPBP1	PAR-CLIP	27292025
hsa-mir-26b-5p	MIMAT0000083	AGTR1	Microarray	19088304
hsa-mir-6069	MIMAT0023694	AGTRAP	HITS-CLIP	23824327
hsa-mir-130b-5p	MIMAT0004680	AHCY	HITS-CLIP	23824327
hsa-let-7e-5p	MIMAT0000066	AHCYL2	PAR-CLIP	23592263
hsa-let-7e-5p	MIMAT0000066	AHR	PAR-CLIP	23592263
hsa-mir-26b-5p	MIMAT0000083	AIFM1	Microarray	19088304
hsa-let-7e-5p	MIMAT0000066	AK4	PAR-CLIP	23446348|20371350
hsa-mir-26b-5p	MIMAT0000083	AK4	Microarray	19088304
hsa-mir-130b-5p	MIMAT0004680	AKAP2	HITS-CLIP	23824327
hsa-mir-26b-5p	MIMAT0000083	AKAP5	Microarray	19088304
hsa-mir-7641	MIMAT0029782	AKAP6	HITS-CLIP	23313552
hsa-let-7e-5p	MIMAT0000066	AKAP8	PAR-CLIP	21572407|20371350
hsa-mir-130b-5p	MIMAT0004680	AKIP1	HITS-CLIP	23824327
hsa-mir-26b-5p	MIMAT0000083	AKIRIN1	HITS-CLIP	23824327
hsa-mir-4722-3p	MIMAT0019837	AKIRIN1	HITS-CLIP	23824327
hsa-mir-1244	MIMAT0005896	AKR1B10	PAR-CLIP	22291592
hsa-mir-26b-5p	MIMAT0000083	AKT1	Microarray	19088304
hsa-mir-130b-5p	MIMAT0004680	ALDH1B1	CLASH	23622248
hsa-mir-4722-3p	MIMAT0019837	ALDH1L2	HITS-CLIP	19536157
hsa-mir-4722-3p	MIMAT0019837	ALDH5A1	HITS-CLIP	23824327
hsa-mir-26b-5p	MIMAT0000083	ALDH6A1	HITS-CLIP	23824327
hsa-mir-4722-3p	MIMAT0019837	ALDH7A1	HITS-CLIP	23824327
hsa-mir-1244	MIMAT0005896	ALDOA	PAR-CLIP	27292025
hsa-mir-4722-3p	MIMAT0019837	ALDOA	HITS-CLIP//PAR-CLIP	23824327|27292025
hsa-mir-6069	MIMAT0023694	ALDOA	PAR-CLIP	22291592
hsa-mir-26b-5p	MIMAT0000083	ALG1	PAR-CLIP	21572407
hsa-let-7e-5p	MIMAT0000066	ALG13	CLASH	23622248
hsa-mir-7641	MIMAT0029782	ALG14	HITS-CLIP	23824327
hsa-mir-26b-5p	MIMAT0000083	ALG3	Microarray	19088304
hsa-mir-26b-5p	MIMAT0000083	ALG9	Microarray	19088304
hsa-mir-130b-5p	MIMAT0004680	ALG9	PAR-CLIP	23592263
hsa-mir-26b-5p	MIMAT0000083	ALKBH4	Microarray	19088304
hsa-mir-26b-5p	MIMAT0000083	ALPI	Microarray	19088304
hsa-mir-26b-5p	MIMAT0000083	ALPK3	Microarray	19088304
hsa-mir-26b-5p	MIMAT0000083	ALX1	Microarray	19088304
hsa-let-7e-5p	MIMAT0000066	AMD1	HITS-CLIP	23313552
hsa-mir-26b-5p	MIMAT0000083	AMDHD2	Microarray	19088304
hsa-let-7e-5p	MIMAT0000066	AMPD2	CLASH	23622248
hsa-mir-26b-5p	MIMAT0000083	ANAPC1	Microarray	19088304
hsa-mir-26b-5p	MIMAT0000083	ANAPC13	Microarray	19088304
hsa-mir-7641	MIMAT0029782	ANG	HITS-CLIP	24906430
hsa-mir-4722-3p	MIMAT0019837	ANGEL1	HITS-CLIP	23824327
hsa-mir-130b-5p	MIMAT0004680	ANKRD28	HITS-CLIP	23824327
hsa-mir-26b-5p	MIMAT0000083	ANKRD36B	Microarray	19088304
hsa-mir-26b-5p	MIMAT0000083	ANKRD36BP1	Microarray	19088304
hsa-let-7e-5p	MIMAT0000066	ANKRD40	CLASH	23622248
hsa-let-7e-5p	MIMAT0000066	ANKRD46	PAR-CLIP	22100165|26701625
hsa-mir-26b-5p	MIMAT0000083	ANKRD46	Microarray	19088304
hsa-mir-551a	MIMAT0003214	ANKRD50	PAR-CLIP	22012620
hsa-mir-26b-5p	MIMAT0000083	ANKRD52	HITS-CLIP	22473208
hsa-mir-4722-3p	MIMAT0019837	ANKRD62	PAR-CLIP	27292025
hsa-mir-26b-5p	MIMAT0000083	ANO2	Microarray	19088304
hsa-mir-4722-3p	MIMAT0019837	ANO7	HITS-CLIP	23824327
hsa-mir-26b-5p	MIMAT0000083	ANXA1	Microarray	19088304
hsa-mir-26b-5p	MIMAT0000083	ANXA3	Microarray	19088304
hsa-mir-26b-5p	MIMAT0000083	ANXA5	Microarray	19088304
hsa-mir-26b-5p	MIMAT0000083	ANXA8	Microarray	19088304
hsa-mir-26b-5p	MIMAT0000083	ANXA8L1	Microarray	19088304
hsa-mir-26b-5p	MIMAT0000083	AOX1	Microarray	19088304
hsa-let-7e-5p	MIMAT0000066	AP1S1	PAR-CLIP	23592263|26701625
hsa-mir-26b-5p	MIMAT0000083	AP1S3	HITS-CLIP	22473208
hsa-mir-4722-3p	MIMAT0019837	AP1S3	HITS-CLIP	23824327
hsa-mir-4722-3p	MIMAT0019837	AP3M1	HITS-CLIP	23824327
hsa-mir-26b-5p	MIMAT0000083	AP3M2	Microarray	19088304
hsa-mir-5008-3p	MIMAT0021040	AP4S1	PAR-CLIP	22012620
hsa-mir-551a	MIMAT0003214	AP5Z1	PAR-CLIP	22012620
hsa-mir-26b-5p	MIMAT0000083	APBB2	Microarray	19088304
hsa-mir-26b-5p	MIMAT0000083	APOF	Microarray	19088304
hsa-mir-4722-3p	MIMAT0019837	APOL1	HITS-CLIP	23313552
hsa-mir-26b-5p	MIMAT0000083	APOO	Microarray	19088304
hsa-let-7e-5p	MIMAT0000066	APPL1	CLASH	23622248
hsa-mir-4722-3p	MIMAT0019837	APTX	HITS-CLIP	23824327
hsa-let-7e-5p	MIMAT0000066	AQP6	PAR-CLIP	27292025
hsa-mir-26b-5p	MIMAT0000083	AQR	HITS-CLIP	23824327
hsa-mir-26b-5p	MIMAT0000083	ARAP2	Microarray	19088304
hsa-let-7e-5p	MIMAT0000066	ARCN1	CLASH	23622248
hsa-let-7e-5p	MIMAT0000066	AREL1	PAR-CLIP	23592263
hsa-mir-26b-5p	MIMAT0000083	ARF1	PAR-CLIP	20371350
hsa-mir-4722-3p	MIMAT0019837	ARFGEF1	PAR-CLIP	22100165
hsa-mir-4722-3p	MIMAT0019837	ARFGEF3	PAR-CLIP	27292025
hsa-mir-26b-5p	MIMAT0000083	ARFIP2	Microarray	19088304
hsa-mir-26b-5p	MIMAT0000083	ARFRP1	Microarray	19088304
hsa-let-7e-5p	MIMAT0000066	ARHGAP19	CLASH	23622248
hsa-mir-4722-3p	MIMAT0019837	ARHGAP26	HITS-CLIP	23824327
hsa-mir-26b-5p	MIMAT0000083	ARHGAP44	Microarray	19088304
hsa-mir-4722-3p	MIMAT0019837	ARHGEF19	HITS-CLIP	19536157
hsa-mir-26b-5p	MIMAT0000083	ARHGEF39	HITS-CLIP	23824327
hsa-mir-4722-3p	MIMAT0019837	ARHGEF39	HITS-CLIP	23824327
hsa-mir-26b-5p	MIMAT0000083	ARHGEF5	Microarray	19088304
hsa-let-7e-5p	MIMAT0000066	ARID1A	CLASH	23622248
hsa-mir-7641	MIMAT0029782	ARID1A	PAR-CLIP	23592263
hsa-let-7e-5p	MIMAT0000066	ARID3A	Luciferase reporter assay//PAR-CLIP//qRT-PCR//Western blot	23592263|28408353
hsa-mir-130b-5p	MIMAT0004680	ARID3A	HITS-CLIP//PAR-CLIP	23446348|21572407
hsa-let-7e-5p	MIMAT0000066	ARID3B	PAR-CLIP	23446348|21572407|20371350
hsa-mir-26b-5p	MIMAT0000083	ARID3B	Microarray	19088304
hsa-let-7e-5p	MIMAT0000066	ARIH1	PAR-CLIP	21572407
hsa-mir-4722-3p	MIMAT0019837	ARL10	HITS-CLIP	23824327
hsa-mir-7641	MIMAT0029782	ARL10	PAR-CLIP	22100165
hsa-mir-26b-5p	MIMAT0000083	ARL17A	Microarray	19088304
hsa-mir-26b-5p	MIMAT0000083	ARL4A	Microarray	19088304
hsa-mir-26b-5p	MIMAT0000083	ARL4C	Immunoblot//Luciferase reporter assay//qRT-PCR	22673513
hsa-mir-26b-5p	MIMAT0000083	ARL5A	Microarray	19088304
hsa-mir-92a-1-5p	MIMAT0004507	ARL5B	PAR-CLIP	23446348|20371350
hsa-mir-7641	MIMAT0029782	ARL5C	HITS-CLIP//PAR-CLIP	23592263|24398324|23446348|21572407|20371350|23706177|26701625|27292025
hsa-let-7e-5p	MIMAT0000066	ARL8B	HITS-CLIP	23706177
hsa-mir-26b-5p	MIMAT0000083	ARL8B	Microarray	19088304
hsa-mir-26b-5p	MIMAT0000083	ARMC1	Microarray	19088304
hsa-mir-26b-5p	MIMAT0000083	ARMC7	Microarray	19088304
hsa-mir-26b-5p	MIMAT0000083	ARMC8	Microarray	19088304
hsa-mir-26b-5p	MIMAT0000083	ARMCX2	Microarray	19088304
hsa-let-7e-5p	MIMAT0000066	ARNT2	CLASH	23622248
hsa-mir-26b-5p	MIMAT0000083	ARNT2	Microarray	19088304
hsa-mir-26b-5p	MIMAT0000083	ARNTL2	PAR-CLIP	20371350
hsa-mir-26b-5p	MIMAT0000083	ARPC5	Microarray	19088304
hsa-mir-26b-5p	MIMAT0000083	ARPP19	HITS-CLIP	22473208
hsa-mir-26b-5p	MIMAT0000083	ARRB1	Microarray	19088304
hsa-mir-130b-5p	MIMAT0004680	ARRDC3	HITS-CLIP	23824327
hsa-mir-4722-3p	MIMAT0019837	ARSE	HITS-CLIP	23824327
hsa-mir-130b-5p	MIMAT0004680	AS3MT	HITS-CLIP	23824327
hsa-mir-4722-3p	MIMAT0019837	AS3MT	HITS-CLIP//PAR-CLIP	23824327|27292025
hsa-mir-5008-3p	MIMAT0021040	ASB11	HITS-CLIP	19536157
hsa-mir-92a-1-5p	MIMAT0004507	ASB16	PAR-CLIP	26701625
hsa-mir-4722-3p	MIMAT0019837	ASB16	HITS-CLIP	23824327
hsa-mir-130b-5p	MIMAT0004680	ASCL1	HITS-CLIP	23824327
hsa-mir-26b-5p	MIMAT0000083	ASF1B	Microarray	19088304
hsa-mir-130b-5p	MIMAT0004680	ASF1B	CLASH	23622248
hsa-mir-26b-5p	MIMAT0000083	ASNA1	Microarray	19088304
hsa-mir-26b-5p	MIMAT0000083	ASNS	Microarray	19088304
hsa-mir-26b-5p	MIMAT0000083	ASPM	Microarray	19088304
hsa-mir-26b-5p	MIMAT0000083	ASPN	Microarray	19088304
hsa-mir-26b-5p	MIMAT0000083	ASTN2	Microarray	19088304
hsa-mir-26b-5p	MIMAT0000083	ASXL3	HITS-CLIP//Microarray	19088304|23824327
hsa-mir-26b-5p	MIMAT0000083	ATAD2B	Microarray	19088304
hsa-mir-26b-5p	MIMAT0000083	ATAT1	Microarray	19088304
hsa-mir-26b-5p	MIMAT0000083	ATF3	Microarray	19088304
hsa-mir-1244	MIMAT0005896	ATF7IP	PAR-CLIP	20371350
hsa-mir-130b-5p	MIMAT0004680	ATG10	HITS-CLIP	23824327
hsa-let-7e-5p	MIMAT0000066	ATG12	PAR-CLIP	23592263
hsa-let-7e-5p	MIMAT0000066	ATG9A	PAR-CLIP	23592263|26701625|27292025
hsa-mir-130b-5p	MIMAT0004680	ATIC	PAR-CLIP	22100165
hsa-mir-26b-5p	MIMAT0000083	ATP1A1	Microarray	19088304
hsa-mir-26b-5p	MIMAT0000083	ATP1A3	Microarray	19088304
hsa-mir-26b-5p	MIMAT0000083	ATP2A2	Microarray	19088304
hsa-mir-26b-5p	MIMAT0000083	ATP2B1	PAR-CLIP	20371350
hsa-let-7e-5p	MIMAT0000066	ATP6	CLASH	23622248
hsa-mir-26b-5p	MIMAT0000083	ATP6AP1	Microarray	19088304
hsa-mir-92a-1-5p	MIMAT0004507	ATP6AP1	HITS-CLIP	23313552
hsa-mir-130b-5p	MIMAT0004680	ATP6AP1L	HITS-CLIP	23824327
hsa-mir-26b-5p	MIMAT0000083	ATP6AP2	Microarray	19088304
hsa-mir-26b-5p	MIMAT0000083	ATP6V0D1	Microarray	19088304
hsa-mir-26b-5p	MIMAT0000083	ATP6V1A	Microarray	19088304
hsa-let-7e-5p	MIMAT0000066	ATP6V1F	PAR-CLIP	23592263|24398324|26701625|27292025
hsa-let-7e-5p	MIMAT0000066	ATP6V1G1	PAR-CLIP	22100165|22291592|23446348
hsa-mir-26b-5p	MIMAT0000083	ATP7B	Microarray	19088304
hsa-mir-130b-5p	MIMAT0004680	ATP9A	HITS-CLIP	23824327
hsa-let-7e-5p	MIMAT0000066	ATXN2	HITS-CLIP	23313552
hsa-let-7e-5p	MIMAT0000066	ATXN2L	CLASH	23622248
hsa-mir-26b-5p	MIMAT0000083	ATXN2L	Microarray	19088304
hsa-mir-130b-5p	MIMAT0004680	ATXN3	HITS-CLIP	23824327
hsa-mir-130b-5p	MIMAT0004680	ATXN3L	HITS-CLIP	23824327
hsa-mir-130b-5p	MIMAT0004680	ATXN7	PAR-CLIP	22100165
hsa-let-7e-5p	MIMAT0000066	ATXN7L3	PAR-CLIP	23592263
hsa-let-7e-5p	MIMAT0000066	ATXN7L3B	PAR-CLIP	23592263|20371350
hsa-mir-26b-5p	MIMAT0000083	AUP1	Microarray	19088304
hsa-let-7e-5p	MIMAT0000066	AURKB	Luciferase reporter assay//Microarray//qRT-PCR//Western blot	23774216
hsa-mir-1244	MIMAT0005896	AVPR1A	PAR-CLIP	22100165
hsa-mir-130b-5p	MIMAT0004680	B3GALNT1	HITS-CLIP	19536157
hsa-mir-26b-5p	MIMAT0000083	B3GALT1	Microarray	19088304
hsa-mir-26b-5p	MIMAT0000083	B3GALT5	PAR-CLIP	22012620
hsa-mir-26b-5p	MIMAT0000083	BABAM1	Microarray	19088304
hsa-mir-26b-5p	MIMAT0000083	BACE1	Microarray	19088304
hsa-mir-4722-3p	MIMAT0019837	BACE2	HITS-CLIP	23824327
hsa-let-7e-5p	MIMAT0000066	BACH1	PAR-CLIP	20371350
hsa-mir-130b-5p	MIMAT0004680	BAG2	HITS-CLIP	19536157
hsa-mir-26b-5p	MIMAT0000083	BAG3	Microarray	19088304
hsa-let-7e-5p	MIMAT0000066	BAHCC1	CLASH	23622248
hsa-mir-26b-5p	MIMAT0000083	BAHD1	Microarray	19088304
hsa-mir-4722-3p	MIMAT0019837	BAIAP2L1	PAR-CLIP	27292025
hsa-mir-92a-1-5p	MIMAT0004507	BAK1	PAR-CLIP	23592263
hsa-mir-5008-3p	MIMAT0021040	BAMBI	HITS-CLIP	23313552
hsa-mir-7641	MIMAT0029782	BANK1	HITS-CLIP//PAR-CLIP	23592263|24398324|23446348|22012620|21572407|20371350|23706177|23313552|26701625|27292025|27418678
hsa-mir-26b-5p	MIMAT0000083	BATF	Microarray	19088304
hsa-mir-26b-5p	MIMAT0000083	BATF3	Microarray	19088304
hsa-let-7e-5p	MIMAT0000066	BAZ1B	CLASH	23622248
hsa-mir-130b-5p	MIMAT0004680	BBX	HITS-CLIP	23824327
hsa-mir-26b-5p	MIMAT0000083	BCHE	Microarray	19088304
hsa-mir-92a-1-5p	MIMAT0004507	BCL11A	PAR-CLIP	22012620
hsa-mir-26b-5p	MIMAT0000083	BCL11B	Microarray	19088304
hsa-mir-4722-3p	MIMAT0019837	BCL2L1	PAR-CLIP	22012620
hsa-mir-26b-5p	MIMAT0000083	BCL3	Microarray	19088304
hsa-mir-26b-5p	MIMAT0000083	BCL7B	HITS-CLIP	22473208
hsa-mir-26b-5p	MIMAT0000083	BCLAF1	CLASH	23622248
hsa-mir-130b-5p	MIMAT0004680	BDKRB2	HITS-CLIP	19536157
hsa-let-7e-5p	MIMAT0000066	BEND4	PAR-CLIP	21572407|20371350
hsa-mir-26b-5p	MIMAT0000083	BEND4	Sequencing	20371350
hsa-mir-26b-5p	MIMAT0000083	BGLAP	Microarray	19088304
hsa-mir-26b-5p	MIMAT0000083	BID	HITS-CLIP	22473208
hsa-mir-26b-5p	MIMAT0000083	BLNK	Microarray	19088304
hsa-mir-26b-5p	MIMAT0000083	BLOC1S2	PAR-CLIP	23592263|24398324|20371350
hsa-mir-26b-5p	MIMAT0000083	BLOC1S5	Microarray	19088304
hsa-mir-26b-5p	MIMAT0000083	BLVRB	Microarray	19088304
hsa-mir-26b-5p	MIMAT0000083	BMP2	Microarray	19088304
hsa-let-7e-5p	MIMAT0000066	BMP2K	CLASH	23622248
hsa-mir-26b-5p	MIMAT0000083	BMP2K	PAR-CLIP	20371350
hsa-mir-26b-5p	MIMAT0000083	BMP8B	Microarray	19088304
hsa-mir-26b-5p	MIMAT0000083	BMPR1A	HITS-CLIP//PAR-CLIP	23824327|27292025
hsa-mir-4722-3p	MIMAT0019837	BMPR1A	PAR-CLIP	27292025
hsa-mir-26b-5p	MIMAT0000083	BMPR2	Microarray//Sequencing	20371350|19088304
hsa-mir-26b-5p	MIMAT0000083	BNC1	Microarray	19088304
hsa-mir-26b-5p	MIMAT0000083	BNC2	Microarray	19088304
hsa-mir-26b-5p	MIMAT0000083	BOLA2	Microarray	19088304
hsa-mir-26b-5p	MIMAT0000083	BOLA2B	Microarray	19088304
hsa-mir-26b-5p	MIMAT0000083	BORCS6	Microarray	19088304
hsa-mir-130b-5p	MIMAT0004680	BRAT1	CLASH	23622248
hsa-mir-26b-5p	MIMAT0000083	BRCA1	PAR-CLIP	23446348
hsa-mir-26b-5p	MIMAT0000083	BRD3	Microarray	19088304
hsa-mir-26b-5p	MIMAT0000083	BRD4	Microarray	19088304
hsa-mir-26b-5p	MIMAT0000083	BRD8	Microarray	19088304
hsa-mir-26b-5p	MIMAT0000083	BRDT	Microarray	19088304
hsa-let-7e-5p	MIMAT0000066	BRI3	CLASH	23622248
hsa-let-7e-5p	MIMAT0000066	BRI3BP	HITS-CLIP	23706177
hsa-mir-4722-3p	MIMAT0019837	BRMS1L	HITS-CLIP//PAR-CLIP	23824327|27292025|27418678
hsa-mir-7641	MIMAT0029782	BRMS1L	PAR-CLIP	27292025
hsa-mir-26b-5p	MIMAT0000083	BRSK2	Microarray	19088304
hsa-mir-5008-3p	MIMAT0021040	BRWD1	HITS-CLIP	23313552
hsa-let-7e-5p	MIMAT0000066	BSDC1	CLASH	23622248
hsa-mir-26b-5p	MIMAT0000083	BTG1	Microarray	19088304
hsa-mir-26b-5p	MIMAT0000083	BTG2	Microarray	19088304
hsa-mir-130b-5p	MIMAT0004680	BTN3A2	HITS-CLIP	19536157
hsa-mir-7641	MIMAT0029782	BTN3A2	HITS-CLIP	24906430
hsa-mir-26b-5p	MIMAT0000083	BTN3A3	Microarray	19088304
hsa-let-7e-5p	MIMAT0000066	BTRC	CLASH	23622248
hsa-mir-26b-5p	MIMAT0000083	BUD31	Microarray	19088304
hsa-let-7e-5p	MIMAT0000066	BZW1	PAR-CLIP	23592263|20371350|26701625
hsa-mir-92a-1-5p	MIMAT0004507	BZW1	HITS-CLIP	23824327
hsa-mir-4722-3p	MIMAT0019837	C11orf1	PAR-CLIP	27292025
hsa-mir-26b-5p	MIMAT0000083	C11orf16	Microarray	19088304
hsa-mir-4722-3p	MIMAT0019837	C11orf54	HITS-CLIP	19536157
hsa-let-7e-5p	MIMAT0000066	C11orf57	PAR-CLIP	23592263|21572407
hsa-let-7e-5p	MIMAT0000066	C11orf91	CLASH	23622248
hsa-mir-4722-3p	MIMAT0019837	C11orf98	PAR-CLIP	27292025
hsa-let-7e-5p	MIMAT0000066	C12orf4	PAR-CLIP	23446348
hsa-let-7e-5p	MIMAT0000066	C12orf49	CLASH	23622248
hsa-mir-26b-5p	MIMAT0000083	C14orf2	Microarray	19088304
hsa-mir-26b-5p	MIMAT0000083	C14orf37	PAR-CLIP	22100165
hsa-mir-130b-5p	MIMAT0004680	C15orf40	HITS-CLIP	23824327
hsa-mir-4722-3p	MIMAT0019837	C15orf40	HITS-CLIP	23313552
hsa-mir-6069	MIMAT0023694	C15orf40	PAR-CLIP	23446348|22012620
hsa-mir-130b-5p	MIMAT0004680	C15orf61	HITS-CLIP	23824327
hsa-mir-26b-5p	MIMAT0000083	C16orf70	HITS-CLIP//PAR-CLIP	22473208|21572407|20371350
hsa-mir-130b-5p	MIMAT0004680	C17orf105	HITS-CLIP	23824327
hsa-mir-26b-5p	MIMAT0000083	C17orf53	Microarray	19088304
hsa-mir-26b-5p	MIMAT0000083	C18orf25	Sequencing	20371350
hsa-let-7e-5p	MIMAT0000066	C19orf47	PAR-CLIP	21572407|20371350
hsa-let-7e-5p	MIMAT0000066	C19orf48	CLASH	23622248
hsa-let-7e-5p	MIMAT0000066	C19orf53	PAR-CLIP	23592263|26701625
hsa-mir-26b-5p	MIMAT0000083	C1D	Microarray	19088304
hsa-mir-130b-5p	MIMAT0004680	C1GALT1	HITS-CLIP	23824327
hsa-mir-26b-5p	MIMAT0000083	C1GALT1C1	Microarray	19088304
hsa-let-7e-5p	MIMAT0000066	C1orf21	PAR-CLIP	20371350
hsa-let-7e-5p	MIMAT0000066	C1orf210	HITS-CLIP//PAR-CLIP	23446348|21572407|23706177
hsa-mir-130b-5p	MIMAT0004680	C1orf210	HITS-CLIP	19536157
hsa-mir-26b-5p	MIMAT0000083	C1orf216	Microarray	19088304
hsa-mir-4722-3p	MIMAT0019837	C1orf220	HITS-CLIP	23824327
hsa-mir-26b-5p	MIMAT0000083	C1orf50	HITS-CLIP	23824327
hsa-mir-26b-5p	MIMAT0000083	C1QB	Microarray	19088304
hsa-mir-26b-5p	MIMAT0000083	C1QTNF1	Microarray	19088304
hsa-let-7e-5p	MIMAT0000066	C1RL	PAR-CLIP	23592263
hsa-mir-4722-3p	MIMAT0019837	C21orf59	HITS-CLIP	23824327
hsa-mir-130b-5p	MIMAT0004680	C22orf24	HITS-CLIP	19536157
hsa-mir-26b-5p	MIMAT0000083	C3	Microarray//PAR-CLIP	19088304|27292025
hsa-mir-4722-3p	MIMAT0019837	C3orf62	HITS-CLIP	23824327
hsa-mir-26b-5p	MIMAT0000083	C5AR1	Microarray	19088304
hsa-let-7e-5p	MIMAT0000066	C5orf51	PAR-CLIP	23592263|24398324|23446348|21572407|20371350|26701625|27292025
hsa-mir-26b-5p	MIMAT0000083	C6orf15	Microarray	19088304
hsa-mir-4722-3p	MIMAT0019837	C6orf47	PAR-CLIP	22012620
hsa-mir-26b-5p	MIMAT0000083	C7orf55-LUC7L2	HITS-CLIP	23824327
hsa-mir-26b-5p	MIMAT0000083	C8orf33	Microarray	19088304
hsa-mir-4722-3p	MIMAT0019837	C9orf139	HITS-CLIP	23824327
hsa-mir-26b-5p	MIMAT0000083	C9orf16	Microarray	19088304
hsa-mir-4722-3p	MIMAT0019837	C9orf170	PAR-CLIP	22100165
hsa-mir-4722-3p	MIMAT0019837	C9orf3	PAR-CLIP	27292025
hsa-mir-130b-5p	MIMAT0004680	C9orf64	HITS-CLIP	23824327
hsa-mir-26b-5p	MIMAT0000083	CA1	Microarray	19088304
hsa-mir-26b-5p	MIMAT0000083	CA11	Microarray	19088304
hsa-mir-26b-5p	MIMAT0000083	CA2	Microarray//Sequencing	20371350|19088304
hsa-let-7e-5p	MIMAT0000066	CA5B	CLASH	23622248
hsa-mir-26b-5p	MIMAT0000083	CA9	Microarray	19088304
hsa-mir-26b-5p	MIMAT0000083	CAAP1	Microarray	19088304
hsa-mir-26b-5p	MIMAT0000083	CAB39L	Microarray	19088304
hsa-let-7e-5p	MIMAT0000066	CABLES1	CLASH	23622248
hsa-mir-4722-3p	MIMAT0019837	CABP4	HITS-CLIP	19536157
hsa-mir-7641	MIMAT0029782	CABP4	HITS-CLIP//PAR-CLIP	23592263|23824327
hsa-mir-26b-5p	MIMAT0000083	CACNA1S	Microarray	19088304
hsa-mir-92a-1-5p	MIMAT0004507	CACNA2D3	PAR-CLIP	23592263
hsa-mir-26b-5p	MIMAT0000083	CACNB2	Microarray	19088304
hsa-mir-26b-5p	MIMAT0000083	CACNB4	Sequencing	20371350
hsa-mir-26b-5p	MIMAT0000083	CACNG3	Microarray	19088304
hsa-mir-26b-5p	MIMAT0000083	CAD	Microarray	19088304
hsa-mir-26b-5p	MIMAT0000083	CADM1	Microarray	19088304
hsa-mir-130b-5p	MIMAT0004680	CALCOCO2	HITS-CLIP	23824327|27418678
hsa-mir-130b-5p	MIMAT0004680	CALHM5	HITS-CLIP	23824327|21572407
hsa-let-7e-5p	MIMAT0000066	CALU	PAR-CLIP	20371350
hsa-mir-26b-5p	MIMAT0000083	CAMK4	Microarray	19088304
hsa-mir-26b-5p	MIMAT0000083	CAMKMT	Microarray	19088304
hsa-mir-4722-3p	MIMAT0019837	CAMKV	HITS-CLIP	19536157
hsa-mir-26b-5p	MIMAT0000083	CAPN9	Microarray	19088304
hsa-mir-26b-5p	MIMAT0000083	CAPZA1	PAR-CLIP	27292025
hsa-mir-4722-3p	MIMAT0019837	CAPZA1	PAR-CLIP	23446348|20371350
hsa-mir-4722-3p	MIMAT0019837	CAPZA2	HITS-CLIP	23824327
hsa-mir-26b-5p	MIMAT0000083	CARD14	Microarray	19088304
hsa-let-7e-5p	MIMAT0000066	CARM1	CLASH	23622248
hsa-mir-26b-5p	MIMAT0000083	CARS2	Microarray	19088304
hsa-mir-26b-5p	MIMAT0000083	CASD1	Microarray	19088304
hsa-mir-26b-5p	MIMAT0000083	CASP3	Microarray	19088304
hsa-mir-26b-5p	MIMAT0000083	CASP4	Microarray	19088304
hsa-mir-26b-5p	MIMAT0000083	CASP7	Microarray	19088304
hsa-mir-26b-5p	MIMAT0000083	CASP8	Microarray	19088304
hsa-mir-26b-5p	MIMAT0000083	CASP9	Microarray	19088304
hsa-mir-26b-5p	MIMAT0000083	CASQ1	Microarray	19088304
hsa-let-7e-5p	MIMAT0000066	CASTOR2	PAR-CLIP	26701625
hsa-mir-26b-5p	MIMAT0000083	CATSPERB	Microarray	19088304
hsa-mir-26b-5p	MIMAT0000083	CAV1	Microarray	19088304
hsa-mir-26b-5p	MIMAT0000083	CAV2	Microarray	19088304
hsa-mir-4722-3p	MIMAT0019837	CAV2	HITS-CLIP	23824327
hsa-mir-26b-5p	MIMAT0000083	CBLC	Microarray	19088304
hsa-mir-26b-5p	MIMAT0000083	CBLL1	Microarray	19088304
hsa-mir-5008-3p	MIMAT0021040	CBLL1	HITS-CLIP	19536157
hsa-mir-130b-5p	MIMAT0004680	CBLN2	HITS-CLIP	23824327
hsa-let-7e-5p	MIMAT0000066	CBX5	CLASH//PAR-CLIP	23622248|21572407
hsa-mir-92a-1-5p	MIMAT0004507	CBX5	PAR-CLIP	26701625
hsa-mir-26b-5p	MIMAT0000083	CBX6	Microarray	19088304
hsa-mir-26b-5p	MIMAT0000083	CBY1	Microarray	19088304
hsa-mir-1244	MIMAT0005896	CBY1	PAR-CLIP	21572407|20371350
hsa-mir-7641	MIMAT0029782	CC2D1B	PAR-CLIP	22100165
hsa-mir-4722-3p	MIMAT0019837	CCBE1	HITS-CLIP	23824327
hsa-let-7e-5p	MIMAT0000066	CCDC106	CLASH	23622248
hsa-let-7e-5p	MIMAT0000066	CCDC113	CLASH	23622248
hsa-mir-26b-5p	MIMAT0000083	CCDC144A	Microarray	19088304
hsa-mir-26b-5p	MIMAT0000083	CCDC15	Microarray	19088304
hsa-mir-26b-5p	MIMAT0000083	CCDC170	Microarray	19088304
hsa-mir-130b-5p	MIMAT0004680	CCDC171	HITS-CLIP	23824327
hsa-mir-26b-5p	MIMAT0000083	CCDC181	Microarray	19088304
hsa-mir-26b-5p	MIMAT0000083	CCDC25	Microarray	19088304
hsa-mir-26b-5p	MIMAT0000083	CCDC28A	Microarray	19088304
hsa-mir-4722-3p	MIMAT0019837	CCDC86	PAR-CLIP	23446348|26701625
hsa-mir-130b-5p	MIMAT0004680	CCDC93	HITS-CLIP	23824327
hsa-let-7e-5p	MIMAT0000066	CCDC97	CLASH	23622248
hsa-mir-130b-5p	MIMAT0004680	CCL16	HITS-CLIP	23824327
hsa-mir-26b-5p	MIMAT0000083	CCL2	Microarray	19088304
hsa-mir-26b-5p	MIMAT0000083	CCL27	Microarray	19088304
hsa-mir-26b-5p	MIMAT0000083	CCL7	Microarray	19088304
hsa-mir-26b-5p	MIMAT0000083	CCNB1IP1	Microarray	19088304
hsa-let-7e-5p	MIMAT0000066	CCND1	Luciferase reporter assay//PAR-CLIP//qRT-PCR//Western blot	21969366|23592263|24100610|26701625
hsa-mir-26b-5p	MIMAT0000083	CCND1	Microarray	19088304
hsa-mir-26b-5p	MIMAT0000083	CCND2	PAR-CLIP	23446348|22012620|21572407|20371350
hsa-mir-26b-5p	MIMAT0000083	CCNDBP1	Microarray	19088304
hsa-mir-26b-5p	MIMAT0000083	CCNE1	HITS-CLIP//Luciferase reporter assay//Western blot	22210897|22473208
hsa-mir-6069	MIMAT0023694	CCNE2	PAR-CLIP	23446348
hsa-let-7e-5p	MIMAT0000066	CCNG1	CLASH	23622248
hsa-mir-26b-5p	MIMAT0000083	CCNI	Microarray	19088304
hsa-mir-26b-5p	MIMAT0000083	CCNL2	Microarray	19088304
hsa-let-7e-5p	MIMAT0000066	CCNT2	PAR-CLIP	21572407
hsa-mir-5008-3p	MIMAT0021040	CCR5	HITS-CLIP	23824327
hsa-mir-26b-5p	MIMAT0000083	CCR6	Microarray	19088304
hsa-mir-26b-5p	MIMAT0000083	CCSER2	Microarray	19088304
hsa-mir-26b-5p	MIMAT0000083	CCT7	Microarray	19088304
hsa-mir-130b-5p	MIMAT0004680	CD200	HITS-CLIP	23824327
hsa-mir-26b-5p	MIMAT0000083	CD248	Microarray	19088304
hsa-mir-26b-5p	MIMAT0000083	CD28	Microarray	19088304
hsa-mir-26b-5p	MIMAT0000083	CD36	Microarray	19088304
hsa-mir-130b-5p	MIMAT0004680	CD44	HITS-CLIP	23824327
hsa-mir-26b-5p	MIMAT0000083	CD55	PAR-CLIP	23592263
hsa-mir-130b-5p	MIMAT0004680	CD55	HITS-CLIP	23824327
hsa-let-7e-5p	MIMAT0000066	CD59	PAR-CLIP	23446348|20371350
hsa-mir-130b-5p	MIMAT0004680	CD82	HITS-CLIP	23824327
hsa-mir-130b-5p	MIMAT0004680	CD84	HITS-CLIP	23824327
hsa-mir-130b-5p	MIMAT0004680	CD86	HITS-CLIP	23824327
hsa-mir-4722-3p	MIMAT0019837	CD99L2	HITS-CLIP	28735896
hsa-mir-26b-5p	MIMAT0000083	CDC14B	Microarray	19088304
hsa-mir-4722-3p	MIMAT0019837	CDC14B	PAR-CLIP	27292025
hsa-mir-26b-5p	MIMAT0000083	CDC25B	Microarray	19088304
hsa-mir-130b-5p	MIMAT0004680	CDC37L1	CLASH	23622248
hsa-mir-130b-5p	MIMAT0004680	CDC42BPA	HITS-CLIP	19536157
hsa-let-7e-5p	MIMAT0000066	CDC5L	CLASH	23622248
hsa-mir-130b-5p	MIMAT0004680	CDC5L	CLASH	23622248
hsa-let-7e-5p	MIMAT0000066	CDCA3	CLASH	23622248
hsa-mir-26b-5p	MIMAT0000083	CDCA3	Microarray	19088304
hsa-mir-26b-5p	MIMAT0000083	CDH1	Microarray	19088304
hsa-let-7e-5p	MIMAT0000066	CDH18	CLASH	23622248
hsa-mir-1244	MIMAT0005896	CDH2	HITS-CLIP	23824327|27418678
hsa-mir-26b-5p	MIMAT0000083	CDH5	Microarray	19088304
hsa-mir-26b-5p	MIMAT0000083	CDH9	Microarray	19088304
hsa-mir-26b-5p	MIMAT0000083	CDIPT	Microarray	19088304
hsa-mir-130b-5p	MIMAT0004680	CDK12	HITS-CLIP	23824327
hsa-mir-26b-5p	MIMAT0000083	CDK14	Microarray	19088304
hsa-mir-1244	MIMAT0005896	CDK17	PAR-CLIP	21572407
hsa-mir-26b-5p	MIMAT0000083	CDK18	Microarray	19088304
hsa-mir-26b-5p	MIMAT0000083	CDK19	Microarray	19088304
hsa-mir-26b-5p	MIMAT0000083	CDK2	Microarray	19088304
hsa-mir-26b-5p	MIMAT0000083	CDK2AP2	Microarray	19088304
hsa-mir-7641	MIMAT0029782	CDK4	HITS-CLIP	23824327
hsa-mir-26b-5p	MIMAT0000083	CDK5R1	Microarray	19088304
hsa-mir-26b-5p	MIMAT0000083	CDK6	Luciferase reporter assay//Western blot	22210897
hsa-mir-26b-5p	MIMAT0000083	CDK9	HITS-CLIP	23824327
hsa-let-7e-5p	MIMAT0000066	CDKAL1	CLASH//HITS-CLIP	23622248|23706177
hsa-mir-7641	MIMAT0029782	CDKL1	PAR-CLIP	23592263
hsa-mir-26b-5p	MIMAT0000083	CDKL2	Microarray	19088304
hsa-let-7e-5p	MIMAT0000066	CDKN1A	PAR-CLIP	21572407
hsa-mir-26b-5p	MIMAT0000083	CDKN2D	Microarray	19088304
hsa-mir-7641	MIMAT0029782	CDKN3	HITS-CLIP	23824327
hsa-mir-130b-5p	MIMAT0004680	CDON	HITS-CLIP	23824327
hsa-mir-4722-3p	MIMAT0019837	CDT1	HITS-CLIP	23824327|19536157
hsa-let-7e-5p	MIMAT0000066	CDV3	PAR-CLIP	21572407
hsa-mir-26b-5p	MIMAT0000083	CDV3	PAR-CLIP	20371350
hsa-mir-4722-3p	MIMAT0019837	CDX2	HITS-CLIP	23824327
hsa-mir-4722-3p	MIMAT0019837	CEACAM19	HITS-CLIP	28735896
hsa-mir-4722-3p	MIMAT0019837	CEACAM5	HITS-CLIP	23824327
hsa-mir-5008-3p	MIMAT0021040	CEBPG	PAR-CLIP	23446348|21572407|20371350
hsa-mir-26b-5p	MIMAT0000083	CELA3B	Microarray	19088304
hsa-let-7e-5p	MIMAT0000066	CELF1	PAR-CLIP	24398324
hsa-mir-5008-3p	MIMAT0021040	CELF1	PAR-CLIP	20371350
hsa-let-7e-5p	MIMAT0000066	CELF2	CLASH	23622248
hsa-mir-26b-5p	MIMAT0000083	CEMP1	Microarray	19088304
hsa-mir-26b-5p	MIMAT0000083	CEND1	Microarray	19088304
hsa-mir-4722-3p	MIMAT0019837	CENPI	PAR-CLIP	27292025
hsa-mir-4722-3p	MIMAT0019837	CENPM	PAR-CLIP	27292025
hsa-let-7e-5p	MIMAT0000066	CENPP	CLASH	23622248
hsa-mir-26b-5p	MIMAT0000083	CENPQ	Microarray	19088304
hsa-let-7e-5p	MIMAT0000066	CEP120	PAR-CLIP	23592263
hsa-let-7e-5p	MIMAT0000066	CEP135	PAR-CLIP	24398324
hsa-mir-4722-3p	MIMAT0019837	CEP135	HITS-CLIP	23824327
hsa-mir-7641	MIMAT0029782	CEP170	PAR-CLIP	22012620
hsa-mir-1244	MIMAT0005896	CEP55	PAR-CLIP	21572407|20371350
hsa-mir-5008-3p	MIMAT0021040	CEP57	PAR-CLIP	27292025
hsa-mir-4722-3p	MIMAT0019837	CEP76	HITS-CLIP//PAR-CLIP	23824327|27292025
hsa-mir-26b-5p	MIMAT0000083	CEP83	Microarray	19088304
hsa-mir-26b-5p	MIMAT0000083	CEP85	Microarray	19088304
hsa-mir-26b-5p	MIMAT0000083	CERK	Microarray	19088304
hsa-mir-130b-5p	MIMAT0004680	CERS4	HITS-CLIP	23824327
hsa-mir-4722-3p	MIMAT0019837	CERS4	HITS-CLIP	23824327|23313552
hsa-mir-26b-5p	MIMAT0000083	CES2	PAR-CLIP	23592263
hsa-mir-4722-3p	MIMAT0019837	CES2	PAR-CLIP	23592263
hsa-mir-26b-5p	MIMAT0000083	CES3	Microarray	19088304
hsa-mir-130b-5p	MIMAT0004680	CFHR5	HITS-CLIP	23824327
hsa-mir-26b-5p	MIMAT0000083	CFI	Microarray	19088304
hsa-mir-130b-5p	MIMAT0004680	CGNL1	CLASH	23622248
hsa-mir-26b-5p	MIMAT0000083	CH25H	Microarray	19088304
hsa-mir-26b-5p	MIMAT0000083	CHAC1	HITS-CLIP//PAR-CLIP	22473208|21572407|20371350
hsa-mir-26b-5p	MIMAT0000083	CHAF1A	HITS-CLIP	22473208
hsa-mir-130b-5p	MIMAT0004680	CHD1	CLASH	23622248
hsa-mir-6069	MIMAT0023694	CHD4	PAR-CLIP	20371350
hsa-let-7e-5p	MIMAT0000066	CHD7	CLASH	23622248
hsa-let-7e-5p	MIMAT0000066	CHD9	CLASH	23622248
hsa-mir-26b-5p	MIMAT0000083	CHD9	Microarray	19088304
hsa-mir-7641	MIMAT0029782	CHD9	HITS-CLIP	23313552
hsa-mir-26b-5p	MIMAT0000083	CHEK2	PAR-CLIP	24398324|21572407|20371350
hsa-mir-26b-5p	MIMAT0000083	CHERP	Sequencing	20371350
hsa-mir-26b-5p	MIMAT0000083	CHM	Microarray	19088304
hsa-mir-26b-5p	MIMAT0000083	CHMP3	Microarray	19088304
hsa-mir-26b-5p	MIMAT0000083	CHMP6	Microarray	19088304
hsa-mir-26b-5p	MIMAT0000083	CHMP7	Microarray	19088304
hsa-mir-26b-5p	MIMAT0000083	CHORDC1	HITS-CLIP//Immunoblot//Luciferase reporter assay//Microarray//qRT-PCR	19088304|25342750|22473208
hsa-mir-26b-5p	MIMAT0000083	CHPF	Microarray	19088304
hsa-mir-26b-5p	MIMAT0000083	CHST12	Microarray	19088304
hsa-mir-4722-3p	MIMAT0019837	CHST12	PAR-CLIP	23708386
hsa-mir-26b-5p	MIMAT0000083	CHST15	Microarray	19088304
hsa-mir-26b-5p	MIMAT0000083	CHST4	Microarray	19088304
hsa-mir-26b-5p	MIMAT0000083	CHST7	Microarray	19088304
hsa-mir-7641	MIMAT0029782	CHSY1	PAR-CLIP	20371350
hsa-let-7e-5p	MIMAT0000066	CHTOP	HITS-CLIP	23313552
hsa-mir-26b-5p	MIMAT0000083	CIAO1	Microarray	19088304
hsa-mir-7641	MIMAT0029782	CIAO1	HITS-CLIP	23824327
hsa-mir-92a-1-5p	MIMAT0004507	CIAPIN1	PAR-CLIP	23592263
hsa-mir-26b-5p	MIMAT0000083	CIB1	Microarray	19088304
hsa-mir-26b-5p	MIMAT0000083	CISH	Microarray	19088304
hsa-mir-92a-1-5p	MIMAT0004507	CISH	Microarray//qRT-PCR	22660396
hsa-mir-551a	MIMAT0003214	CKB	Luciferase reporter assay//qRT-PCR	25601461
hsa-mir-4722-3p	MIMAT0019837	CKS1B	PAR-CLIP	27292025
hsa-mir-26b-5p	MIMAT0000083	CKS2	PAR-CLIP	23592263
hsa-let-7e-5p	MIMAT0000066	CLDN12	PAR-CLIP	24398324|23446348|20371350|27292025
hsa-mir-4722-3p	MIMAT0019837	CLDN16	PAR-CLIP	27292025
hsa-let-7e-5p	MIMAT0000066	CLDN4	CLASH	23622248
hsa-mir-26b-5p	MIMAT0000083	CLEC2B	Microarray	19088304
hsa-mir-26b-5p	MIMAT0000083	CLIC2	Microarray	19088304
hsa-mir-26b-5p	MIMAT0000083	CLINT1	Microarray	19088304
hsa-mir-5008-3p	MIMAT0021040	CLIP4	PAR-CLIP	21572407
hsa-mir-4722-3p	MIMAT0019837	CLNK	PAR-CLIP	27292025
hsa-mir-26b-5p	MIMAT0000083	CLOCK	Microarray	19088304
hsa-mir-4722-3p	MIMAT0019837	CLPB	PAR-CLIP	27292025
hsa-mir-4722-3p	MIMAT0019837	CLPX	HITS-CLIP	23313552
hsa-mir-26b-5p	MIMAT0000083	CLSTN1	Microarray	19088304
hsa-mir-26b-5p	MIMAT0000083	CLSTN2	Microarray	19088304
hsa-mir-26b-5p	MIMAT0000083	CLTA	Microarray	19088304
hsa-let-7e-5p	MIMAT0000066	CLTC	CLASH	23622248
hsa-mir-4722-3p	MIMAT0019837	CLUAP1	HITS-CLIP	23824327
hsa-mir-7641	MIMAT0029782	CMBL	HITS-CLIP	19536157
hsa-mir-26b-5p	MIMAT0000083	CMC2	Microarray	19088304
hsa-mir-26b-5p	MIMAT0000083	CMC4	Microarray	19088304
hsa-mir-26b-5p	MIMAT0000083	CMPK1	Microarray	19088304
hsa-mir-26b-5p	MIMAT0000083	CMTM6	Microarray	19088304
hsa-let-7e-5p	MIMAT0000066	CNBP	CLASH	23622248
hsa-mir-4722-3p	MIMAT0019837	CNDP1	HITS-CLIP	23313552
hsa-mir-1244	MIMAT0005896	CNEP1R1	HITS-CLIP	23313552
hsa-mir-26b-5p	MIMAT0000083	CNIH4	Microarray	19088304
hsa-mir-4722-3p	MIMAT0019837	CNNM1	PAR-CLIP	27292025
hsa-mir-26b-5p	MIMAT0000083	CNNM2	Microarray	19088304
hsa-mir-26b-5p	MIMAT0000083	CNOT4	Sequencing	20371350
hsa-mir-1244	MIMAT0005896	CNOT6	PAR-CLIP	24398324
hsa-mir-26b-5p	MIMAT0000083	CNPY3	Microarray	19088304
hsa-mir-26b-5p	MIMAT0000083	CNTFR	Microarray	19088304
hsa-mir-26b-5p	MIMAT0000083	CNTLN	Microarray	19088304
hsa-mir-26b-5p	MIMAT0000083	CNTRL	Microarray	19088304
hsa-mir-26b-5p	MIMAT0000083	COA4	Microarray	19088304
hsa-mir-130b-5p	MIMAT0004680	COA4	HITS-CLIP	23824327
hsa-mir-26b-5p	MIMAT0000083	COASY	Microarray	19088304
hsa-let-7e-5p	MIMAT0000066	COIL	PAR-CLIP	23446348|21572407|20371350
hsa-mir-26b-5p	MIMAT0000083	COL12A1	pSILAC	23939832
hsa-mir-26b-5p	MIMAT0000083	COL15A1	Microarray	19088304
hsa-mir-26b-5p	MIMAT0000083	COL1A2	Luciferase reporter assay//qRT-PCR//Western blot	28079129
hsa-mir-26b-5p	MIMAT0000083	COL4A2	Microarray	19088304
hsa-mir-26b-5p	MIMAT0000083	COL4A4	Microarray	19088304
hsa-mir-130b-5p	MIMAT0004680	COL4A4	HITS-CLIP	23824327
hsa-mir-26b-5p	MIMAT0000083	COL4A5	Microarray	19088304
hsa-mir-26b-5p	MIMAT0000083	COL5A1	Microarray	19088304
hsa-let-7e-5p	MIMAT0000066	COL6A1	CLASH	23622248
hsa-let-7e-5p	MIMAT0000066	COL8A1	PAR-CLIP	23592263
hsa-mir-6069	MIMAT0023694	COL9A2	PAR-CLIP	22012620
hsa-let-7e-5p	MIMAT0000066	COLEC12	PAR-CLIP	21572407
hsa-mir-26b-5p	MIMAT0000083	COLEC12	Microarray	19088304
hsa-mir-4722-3p	MIMAT0019837	COMMD2	HITS-CLIP	23824327
hsa-mir-26b-5p	MIMAT0000083	COMMD3	Microarray	19088304
hsa-mir-130b-5p	MIMAT0004680	COPB1	CLASH	23622248
hsa-let-7e-5p	MIMAT0000066	COPG1	CLASH	23622248
hsa-mir-26b-5p	MIMAT0000083	COPZ2	Microarray	19088304
hsa-mir-26b-5p	MIMAT0000083	COQ2	Microarray	19088304
hsa-mir-7641	MIMAT0029782	COQ7	PAR-CLIP	27292025
hsa-mir-26b-5p	MIMAT0000083	COQ9	Microarray	19088304
hsa-mir-4722-3p	MIMAT0019837	CORO2A	HITS-CLIP	23824327
hsa-let-7e-5p	MIMAT0000066	COX1	CLASH	23622248
hsa-let-7e-5p	MIMAT0000066	COX10	CLASH	23622248
hsa-let-7e-5p	MIMAT0000066	COX14	CLASH	23622248
hsa-let-7e-5p	MIMAT0000066	COX16	CLASH	23622248
hsa-mir-26b-5p	MIMAT0000083	COX2	Luciferase reporter assay//qRT-PCR//Western blot	25483152
hsa-mir-7641	MIMAT0029782	COX20	PAR-CLIP	23446348|22012620|21572407|20371350
hsa-let-7e-5p	MIMAT0000066	COX3	CLASH	23622248
hsa-mir-26b-5p	MIMAT0000083	COX5A	HITS-CLIP	22473208
hsa-let-7e-5p	MIMAT0000066	COX6B1	HITS-CLIP	23706177
hsa-mir-130b-5p	MIMAT0004680	COX6B1	CLASH	23622248
hsa-mir-26b-5p	MIMAT0000083	COX7A2L	Microarray	19088304
hsa-mir-26b-5p	MIMAT0000083	COX8A	Microarray	19088304
hsa-mir-26b-5p	MIMAT0000083	CPA1	Microarray	19088304
hsa-let-7e-5p	MIMAT0000066	CPA4	HITS-CLIP	23706177
hsa-mir-26b-5p	MIMAT0000083	CPA4	Microarray	19088304
hsa-mir-26b-5p	MIMAT0000083	CPB2	Microarray	19088304
hsa-mir-26b-5p	MIMAT0000083	CPM	Microarray	19088304
hsa-mir-4722-3p	MIMAT0019837	CPM	HITS-CLIP	23824327
hsa-mir-26b-5p	MIMAT0000083	CPN2	Microarray	19088304
hsa-mir-26b-5p	MIMAT0000083	CPSF2	HITS-CLIP	22473208
hsa-mir-26b-5p	MIMAT0000083	CPSF7	pSILAC	23939832
hsa-mir-92a-1-5p	MIMAT0004507	CPSF7	PAR-CLIP	26701625
hsa-mir-26b-5p	MIMAT0000083	CRADD	Microarray	19088304
hsa-mir-4722-3p	MIMAT0019837	CRCP	HITS-CLIP	23824327
hsa-mir-92a-1-5p	MIMAT0004507	CREB5	HITS-CLIP	19536157
hsa-let-7e-5p	MIMAT0000066	CREBBP	CLASH	23622248
hsa-mir-26b-5p	MIMAT0000083	CREBRF	PAR-CLIP	23592263
hsa-mir-26b-5p	MIMAT0000083	CREBZF	PAR-CLIP//Sequencing	20371350|24398324|21572407
hsa-mir-26b-5p	MIMAT0000083	CREG1	Microarray	19088304
hsa-mir-26b-5p	MIMAT0000083	CRELD1	Microarray	19088304
hsa-mir-4722-3p	MIMAT0019837	CREM	HITS-CLIP	23313552
hsa-mir-26b-5p	MIMAT0000083	CRIM1	Microarray	19088304
hsa-mir-26b-5p	MIMAT0000083	CRIP2	Microarray	19088304
hsa-mir-4722-3p	MIMAT0019837	CRISPLD2	HITS-CLIP	23313552
hsa-let-7e-5p	MIMAT0000066	CRK	CLASH	23622248
hsa-mir-26b-5p	MIMAT0000083	CRLF1	Microarray	19088304
hsa-mir-26b-5p	MIMAT0000083	CRTAM	Microarray	19088304
hsa-mir-4722-3p	MIMAT0019837	CRTC2	PAR-CLIP	23592263
hsa-let-7e-5p	MIMAT0000066	CRX	PAR-CLIP	26701625
hsa-let-7e-5p	MIMAT0000066	CRY2	PAR-CLIP	23592263|26701625
hsa-mir-130b-5p	MIMAT0004680	CRY2	HITS-CLIP	23824327
hsa-mir-6069	MIMAT0023694	CRY2	PAR-CLIP	23592263|26701625
hsa-mir-26b-5p	MIMAT0000083	CRYAA	Microarray	19088304
hsa-mir-26b-5p	MIMAT0000083	CRYGC	Microarray	19088304
hsa-mir-26b-5p	MIMAT0000083	CRYL1	Microarray	19088304
hsa-mir-26b-5p	MIMAT0000083	CRYZ	Microarray	19088304
hsa-mir-130b-5p	MIMAT0004680	CSE1L	CLASH	23622248
hsa-mir-26b-5p	MIMAT0000083	CSGALNACT2	Microarray	19088304
hsa-mir-26b-5p	MIMAT0000083	CSN3	Microarray	19088304
hsa-mir-26b-5p	MIMAT0000083	CSNK1A1	HITS-CLIP	19536157
hsa-mir-1244	MIMAT0005896	CSNK1A1	PAR-CLIP	21572407
hsa-mir-4722-3p	MIMAT0019837	CSNK1E	HITS-CLIP	23824327
hsa-mir-26b-5p	MIMAT0000083	CSNK1G1	Microarray	19088304
hsa-mir-26b-5p	MIMAT0000083	CSPG5	Microarray	19088304
hsa-mir-130b-5p	MIMAT0004680	CSRNP3	HITS-CLIP	19536157
hsa-mir-1244	MIMAT0005896	CSRP2	PAR-CLIP	23592263|21572407
hsa-mir-5008-3p	MIMAT0021040	CSRP2	PAR-CLIP	23592263|21572407
hsa-mir-26b-5p	MIMAT0000083	CST2	Microarray	19088304
hsa-mir-26b-5p	MIMAT0000083	CST3	Microarray	19088304
hsa-mir-130b-5p	MIMAT0004680	CST3	HITS-CLIP	23824327
hsa-mir-26b-5p	MIMAT0000083	CSTF2	PAR-CLIP	20371350
hsa-mir-92a-1-5p	MIMAT0004507	CSTF2	PAR-CLIP	23592263
hsa-let-7e-5p	MIMAT0000066	CTC1	CLASH	23622248
hsa-mir-26b-5p	MIMAT0000083	CTDNEP1	Microarray	19088304
hsa-mir-26b-5p	MIMAT0000083	CTGF	Luciferase reporter assay//qRT-PCR//Western blot	28079129
hsa-mir-26b-5p	MIMAT0000083	CTH	Microarray	19088304
hsa-mir-26b-5p	MIMAT0000083	CTNS	Microarray//PAR-CLIP	19088304|23592263
hsa-mir-4722-3p	MIMAT0019837	CTNS	PAR-CLIP	23592263
hsa-let-7e-5p	MIMAT0000066	CTPS1	HITS-CLIP	23313552
hsa-let-7e-5p	MIMAT0000066	CTSA	CLASH	23622248
hsa-mir-26b-5p	MIMAT0000083	CTSD	Microarray	19088304
hsa-mir-26b-5p	MIMAT0000083	CTSV	Microarray	19088304
hsa-mir-26b-5p	MIMAT0000083	CTSZ	Microarray	19088304
hsa-mir-130b-5p	MIMAT0004680	CUBN	HITS-CLIP	23824327
hsa-let-7e-5p	MIMAT0000066	CWC15	CLASH	23622248
hsa-mir-26b-5p	MIMAT0000083	CXADR	Microarray	19088304
hsa-mir-26b-5p	MIMAT0000083	CXCL13	Microarray	19088304
hsa-mir-26b-5p	MIMAT0000083	CXCL6	Microarray	19088304
hsa-let-7e-5p	MIMAT0000066	CXCL8	PAR-CLIP	26701625
hsa-mir-26b-5p	MIMAT0000083	CXCL9	Microarray	19088304
hsa-mir-26b-5p	MIMAT0000083	CXCR1	Microarray	19088304
hsa-mir-26b-5p	MIMAT0000083	CXCR4	Microarray	19088304
hsa-mir-26b-5p	MIMAT0000083	CXCR6	Microarray	19088304
hsa-mir-26b-5p	MIMAT0000083	CXorf38	Microarray	19088304
hsa-mir-26b-5p	MIMAT0000083	CYB561D2	Microarray	19088304
hsa-mir-26b-5p	MIMAT0000083	CYB5R4	Microarray	19088304
hsa-mir-26b-5p	MIMAT0000083	CYBRD1	Microarray	19088304
hsa-mir-4722-3p	MIMAT0019837	CYCS	HITS-CLIP//PAR-CLIP	23824327|27292025
hsa-mir-26b-5p	MIMAT0000083	CYLC2	Microarray	19088304
hsa-mir-26b-5p	MIMAT0000083	CYP11B2	Microarray	19088304
hsa-mir-26b-5p	MIMAT0000083	CYP24A1	Microarray	19088304
hsa-mir-5008-3p	MIMAT0021040	CYP24A1	HITS-CLIP	23824327
hsa-mir-26b-5p	MIMAT0000083	CYP27B1	Microarray	19088304
hsa-let-7e-5p	MIMAT0000066	CYP2B6	CLASH	23622248
hsa-mir-26b-5p	MIMAT0000083	CYP2D6	Microarray	19088304
hsa-mir-26b-5p	MIMAT0000083	CYP2D7	Microarray	19088304
hsa-mir-26b-5p	MIMAT0000083	CYP2F1	Microarray	19088304
hsa-mir-26b-5p	MIMAT0000083	CYP4A11	Microarray	19088304|27756246
hsa-mir-26b-5p	MIMAT0000083	CYP4A22	Microarray	19088304
hsa-mir-26b-5p	MIMAT0000083	CYP4F11	Microarray	19088304
hsa-mir-26b-5p	MIMAT0000083	CYP4F8	Microarray	19088304
hsa-mir-26b-5p	MIMAT0000083	CYR61	Microarray	19088304
hsa-mir-26b-5p	MIMAT0000083	CYTH1	Microarray	19088304
hsa-mir-26b-5p	MIMAT0000083	CYTH2	Microarray	19088304
hsa-mir-26b-5p	MIMAT0000083	CYTIP	Microarray	19088304
hsa-mir-7641	MIMAT0029782	CYTIP	PAR-CLIP	22012620
hsa-mir-130b-5p	MIMAT0004680	CYYR1	HITS-CLIP	19536157
hsa-let-7e-5p	MIMAT0000066	DAAM1	CLASH	23622248
hsa-mir-26b-5p	MIMAT0000083	DAB2	Microarray	19088304
hsa-mir-4722-3p	MIMAT0019837	DARS2	HITS-CLIP	24906430
hsa-mir-26b-5p	MIMAT0000083	DBNL	Microarray	19088304
hsa-mir-26b-5p	MIMAT0000083	DCAF10	CLASH//HITS-CLIP	23622248|22473208
hsa-mir-26b-5p	MIMAT0000083	DCAF16	Microarray	19088304
hsa-mir-1244	MIMAT0005896	DCAF16	PAR-CLIP	22012620
hsa-mir-6069	MIMAT0023694	DCAF16	PAR-CLIP	22012620
hsa-let-7e-5p	MIMAT0000066	DCAF6	CLASH	23622248
hsa-let-7e-5p	MIMAT0000066	DCAF8	CLASH	23622248
hsa-mir-26b-5p	MIMAT0000083	DCAF8	Sequencing	20371350
hsa-let-7e-5p	MIMAT0000066	DCBLD2	CLASH	23622248
hsa-mir-26b-5p	MIMAT0000083	DCBLD2	Microarray	19088304
hsa-mir-26b-5p	MIMAT0000083	DCHS2	Microarray	19088304
hsa-mir-1244	MIMAT0005896	DCK	PAR-CLIP	23446348|20371350
hsa-mir-26b-5p	MIMAT0000083	DCP1A	HITS-CLIP//PAR-CLIP	23824327|27292025
hsa-mir-4722-3p	MIMAT0019837	DCP1A	HITS-CLIP//PAR-CLIP	23824327|27292025
hsa-mir-26b-5p	MIMAT0000083	DCSTAMP	Microarray	19088304
hsa-mir-26b-5p	MIMAT0000083	DCTD	Microarray	19088304
hsa-mir-26b-5p	MIMAT0000083	DCTN3	Microarray	19088304
hsa-mir-26b-5p	MIMAT0000083	DCTN4	HITS-CLIP	22473208
hsa-mir-130b-5p	MIMAT0004680	DCTN5	HITS-CLIP	23824327|19536157
hsa-mir-4722-3p	MIMAT0019837	DCTN5	HITS-CLIP	23824327
hsa-mir-26b-5p	MIMAT0000083	DCTPP1	Microarray	19088304
hsa-mir-26b-5p	MIMAT0000083	DCUN1D2	Microarray	19088304
hsa-mir-26b-5p	MIMAT0000083	DDB2	Microarray	19088304
hsa-mir-26b-5p	MIMAT0000083	DDIT4	PAR-CLIP	23592263
hsa-mir-26b-5p	MIMAT0000083	DDX25	Microarray	19088304
hsa-mir-26b-5p	MIMAT0000083	DDX3X	PAR-CLIP//Sequencing	20371350|21572407
hsa-mir-130b-5p	MIMAT0004680	DDX3X	CLASH	23622248
hsa-mir-4722-3p	MIMAT0019837	DDX51	HITS-CLIP	23824327
hsa-mir-26b-5p	MIMAT0000083	DDX6	Sequencing	20371350
hsa-mir-26b-5p	MIMAT0000083	DDX60	Microarray	19088304
hsa-mir-26b-5p	MIMAT0000083	DEFA1	Microarray	19088304
hsa-mir-26b-5p	MIMAT0000083	DEFA3	Microarray	19088304
hsa-mir-26b-5p	MIMAT0000083	DEFB4A	Microarray	19088304
hsa-mir-26b-5p	MIMAT0000083	DEFB4B	Microarray	19088304
hsa-mir-130b-5p	MIMAT0004680	DEK	PAR-CLIP	23446348|21572407|20371350
hsa-mir-4722-3p	MIMAT0019837	DENND5B	HITS-CLIP	23824327
hsa-mir-26b-5p	MIMAT0000083	DEPDC1	HITS-CLIP//PAR-CLIP	23446348|21572407|20371350
hsa-mir-26b-5p	MIMAT0000083	DERA	Microarray	19088304
hsa-mir-26b-5p	MIMAT0000083	DERL1	CLASH	23622248
hsa-mir-4722-3p	MIMAT0019837	DERL2	HITS-CLIP	19536157
hsa-mir-26b-5p	MIMAT0000083	DFNA5	Microarray	19088304
hsa-mir-26b-5p	MIMAT0000083	DGAT1	Microarray	19088304
hsa-let-7e-5p	MIMAT0000066	DGCR8	CLASH	23622248
hsa-mir-7641	MIMAT0029782	DGKE	HITS-CLIP	23824327
hsa-mir-26b-5p	MIMAT0000083	DGKI	Microarray	19088304
hsa-mir-26b-5p	MIMAT0000083	DGKZ	Microarray	19088304
hsa-mir-130b-5p	MIMAT0004680	DHCR24	HITS-CLIP	23313552
hsa-mir-26b-5p	MIMAT0000083	DHODH	Microarray	19088304
hsa-mir-4722-3p	MIMAT0019837	DHODH	HITS-CLIP	23824327|23313552
hsa-mir-26b-5p	MIMAT0000083	DHRS11	Microarray	19088304
hsa-mir-130b-5p	MIMAT0004680	DHRS3	HITS-CLIP	23824327
hsa-mir-130b-5p	MIMAT0004680	DHTKD1	HITS-CLIP	23824327
hsa-mir-4722-3p	MIMAT0019837	DHTKD1	HITS-CLIP	23824327
hsa-let-7e-5p	MIMAT0000066	DHX15	CLASH	23622248
hsa-mir-26b-5p	MIMAT0000083	DHX30	Microarray	19088304
hsa-mir-26b-5p	MIMAT0000083	DHX35	Microarray	19088304
hsa-let-7e-5p	MIMAT0000066	DHX57	CLASH	23622248
hsa-let-7e-5p	MIMAT0000066	DIABLO	PAR-CLIP	23446348|20371350
hsa-mir-26b-5p	MIMAT0000083	DIABLO	Microarray	19088304
hsa-let-7e-5p	MIMAT0000066	DIAPH1	CLASH	23622248
hsa-mir-130b-5p	MIMAT0004680	DIAPH1	HITS-CLIP	23824327
hsa-mir-5008-3p	MIMAT0021040	DICER1	HITS-CLIP	23824327|19536157
hsa-mir-130b-5p	MIMAT0004680	DIO2	HITS-CLIP	23824327
hsa-mir-26b-5p	MIMAT0000083	DIP2A	HITS-CLIP	19536157
hsa-mir-7641	MIMAT0029782	DIP2A	HITS-CLIP	23824327
hsa-mir-26b-5p	MIMAT0000083	DIS3	Microarray	19088304
hsa-let-7e-5p	MIMAT0000066	DISC1	PAR-CLIP	23592263|26701625|27292025
hsa-mir-26b-5p	MIMAT0000083	DLGAP4	Microarray	19088304
hsa-mir-26b-5p	MIMAT0000083	DMAC2	Microarray	19088304
hsa-mir-26b-5p	MIMAT0000083	DMXL2	Microarray	19088304
hsa-let-7e-5p	MIMAT0000066	DNA2	PAR-CLIP	23446348
hsa-mir-130b-5p	MIMAT0004680	DNAH10OS	HITS-CLIP	23824327
hsa-let-7e-5p	MIMAT0000066	DNAH9	HITS-CLIP	23706177
hsa-mir-26b-5p	MIMAT0000083	DNAJA2	Microarray	19088304
hsa-mir-26b-5p	MIMAT0000083	DNAJA3	Microarray	19088304
hsa-mir-26b-5p	MIMAT0000083	DNAJB4	Microarray	19088304
hsa-mir-6069	MIMAT0023694	DNAJC10	HITS-CLIP	23313552
hsa-mir-26b-5p	MIMAT0000083	DNAJC11	Sequencing	20371350
hsa-mir-26b-5p	MIMAT0000083	DNAJC12	Microarray	19088304
hsa-mir-26b-5p	MIMAT0000083	DNAJC2	Microarray	19088304
hsa-mir-7641	MIMAT0029782	DNAJC22	HITS-CLIP	23824327
hsa-let-7e-5p	MIMAT0000066	DNAJC28	HITS-CLIP	23313552
hsa-mir-5008-3p	MIMAT0021040	DNAJC28	PAR-CLIP	21572407|20371350
hsa-mir-4722-3p	MIMAT0019837	DNAJC30	PAR-CLIP	22291592
hsa-mir-26b-5p	MIMAT0000083	DNAJC6	Microarray	19088304
hsa-mir-5008-3p	MIMAT0021040	DNAJC8	PAR-CLIP	23592263
hsa-let-7e-5p	MIMAT0000066	DNAL1	PAR-CLIP	21572407|27292025
hsa-mir-1244	MIMAT0005896	DNAL1	HITS-CLIP	23313552
hsa-mir-4722-3p	MIMAT0019837	DNAL1	HITS-CLIP	23313552
hsa-mir-26b-5p	MIMAT0000083	DNAL4	Microarray	19088304
hsa-mir-4722-3p	MIMAT0019837	DNASE2	PAR-CLIP	27292025
hsa-mir-26b-5p	MIMAT0000083	DNMBP	HITS-CLIP//Microarray	19088304|22473208
hsa-mir-4722-3p	MIMAT0019837	DNMT3A	HITS-CLIP	23824327
hsa-mir-26b-5p	MIMAT0000083	DOCK10	Microarray	19088304
hsa-mir-7641	MIMAT0029782	DOCK11	PAR-CLIP	27292025
hsa-mir-26b-5p	MIMAT0000083	DONSON	Microarray	19088304
hsa-mir-26b-5p	MIMAT0000083	DPF3	Microarray	19088304
hsa-mir-26b-5p	MIMAT0000083	DPM1	Microarray	19088304
hsa-mir-92a-1-5p	MIMAT0004507	DPM2	PAR-CLIP	23592263
hsa-mir-4722-3p	MIMAT0019837	DPP9	HITS-CLIP	23824327
hsa-mir-26b-5p	MIMAT0000083	DPPA4	Microarray	19088304
hsa-mir-26b-5p	MIMAT0000083	DPY19L1	Microarray	19088304
hsa-mir-26b-5p	MIMAT0000083	DPYSL3	Microarray	19088304
hsa-mir-92a-1-5p	MIMAT0004507	DPYSL5	HITS-CLIP	19536157
hsa-mir-130b-5p	MIMAT0004680	DPYSL5	CLASH	23622248
hsa-mir-26b-5p	MIMAT0000083	DRD3	Microarray	19088304
hsa-mir-7641	MIMAT0029782	DRP2	PAR-CLIP	22291592
hsa-mir-26b-5p	MIMAT0000083	DSC1	Microarray	19088304
hsa-mir-26b-5p	MIMAT0000083	DSCC1	Microarray	19088304
hsa-mir-4722-3p	MIMAT0019837	DSN1	HITS-CLIP	23824327
hsa-let-7e-5p	MIMAT0000066	DSP	CLASH	23622248
hsa-mir-4722-3p	MIMAT0019837	DSTYK	HITS-CLIP	23824327
hsa-mir-130b-5p	MIMAT0004680	DTHD1	HITS-CLIP	23824327
hsa-mir-26b-5p	MIMAT0000083	DTL	Microarray	19088304
hsa-let-7e-5p	MIMAT0000066	DTNB	CLASH	23622248
hsa-mir-26b-5p	MIMAT0000083	DTNB	Microarray	19088304
hsa-let-7e-5p	MIMAT0000066	DTX3L	HITS-CLIP	23706177
hsa-let-7e-5p	MIMAT0000066	DUSP1	PAR-CLIP	21572407
hsa-mir-26b-5p	MIMAT0000083	DUSP1	Microarray	19088304
hsa-mir-130b-5p	MIMAT0004680	DUSP10	HITS-CLIP	23824327
hsa-mir-26b-5p	MIMAT0000083	DUSP12	Microarray	19088304
hsa-mir-26b-5p	MIMAT0000083	DUSP14	Microarray	19088304
hsa-mir-26b-5p	MIMAT0000083	DUSP21	Microarray	19088304
hsa-mir-26b-5p	MIMAT0000083	DUSP22	Microarray	19088304
hsa-mir-26b-5p	MIMAT0000083	DUSP7	Microarray	19088304
hsa-mir-26b-5p	MIMAT0000083	DUT	Microarray	19088304
hsa-mir-4722-3p	MIMAT0019837	DUXA	HITS-CLIP	23824327
hsa-let-7e-5p	MIMAT0000066	DVL3	PAR-CLIP	23446348
hsa-mir-26b-5p	MIMAT0000083	DVL3	Microarray	19088304
hsa-mir-26b-5p	MIMAT0000083	DYNC2LI1	Microarray	19088304
hsa-mir-26b-5p	MIMAT0000083	DYRK1A	HITS-CLIP	22473208
hsa-let-7e-5p	MIMAT0000066	DYRK2	CLASH	23622248
hsa-let-7e-5p	MIMAT0000066	DYRK3	PAR-CLIP	26701625
hsa-mir-26b-5p	MIMAT0000083	DYRK3	Microarray	19088304
hsa-let-7e-5p	MIMAT0000066	DZIP1	CLASH	23622248
hsa-mir-130b-5p	MIMAT0004680	DZIP3	CLASH	23622248
hsa-mir-4722-3p	MIMAT0019837	E2F2	HITS-CLIP	23824327
hsa-let-7e-5p	MIMAT0000066	E2F6	PAR-CLIP	20371350
hsa-mir-26b-5p	MIMAT0000083	E2F7	HITS-CLIP//PAR-CLIP	23446348|20371350|21572407
hsa-mir-26b-5p	MIMAT0000083	EAF2	Microarray	19088304
hsa-mir-130b-5p	MIMAT0004680	EBF4	HITS-CLIP	19536157
hsa-mir-6069	MIMAT0023694	EBI3	PAR-CLIP	22291592
hsa-mir-26b-5p	MIMAT0000083	EBNA1BP2	Microarray	19088304
hsa-mir-26b-5p	MIMAT0000083	ECH1	Microarray	19088304
hsa-let-7e-5p	MIMAT0000066	ECHDC1	PAR-CLIP	21572407
hsa-mir-4722-3p	MIMAT0019837	ECHDC3	PAR-CLIP	27292025
hsa-mir-26b-5p	MIMAT0000083	ECT2	Microarray	19088304
hsa-let-7e-5p	MIMAT0000066	EDEM3	HITS-CLIP	23313552
hsa-mir-26b-5p	MIMAT0000083	EDEM3	PAR-CLIP	23592263
hsa-let-7e-5p	MIMAT0000066	EDN1	PAR-CLIP	23592263
hsa-mir-26b-5p	MIMAT0000083	EDN2	Microarray	19088304
hsa-mir-26b-5p	MIMAT0000083	EED	Microarray	19088304
hsa-mir-26b-5p	MIMAT0000083	EEF1A1	CLASH	23622248
hsa-mir-130b-5p	MIMAT0004680	EEF1E1	HITS-CLIP	23824327
hsa-mir-92a-1-5p	MIMAT0004507	EEF2	CLASH	23622248
hsa-mir-26b-5p	MIMAT0000083	EFCAB14	HITS-CLIP	23824327
hsa-let-7e-5p	MIMAT0000066	EFHD2	PAR-CLIP	23592263
hsa-mir-1244	MIMAT0005896	EFHD2	PAR-CLIP	23592263
hsa-mir-26b-5p	MIMAT0000083	EFNA2	Microarray	19088304
hsa-mir-26b-5p	MIMAT0000083	EFNA4	Microarray	19088304
hsa-mir-130b-5p	MIMAT0004680	EGFLAM	HITS-CLIP	23824327
hsa-mir-26b-5p	MIMAT0000083	EGR3	Microarray	19088304
hsa-mir-26b-5p	MIMAT0000083	EHD1	HITS-CLIP	22473208
hsa-mir-26b-5p	MIMAT0000083	EI24	Microarray	19088304
hsa-mir-26b-5p	MIMAT0000083	EID2B	PAR-CLIP	27292025
hsa-mir-4722-3p	MIMAT0019837	EID2B	PAR-CLIP	27292025
hsa-mir-26b-5p	MIMAT0000083	EIF1AX	Microarray	19088304
hsa-mir-26b-5p	MIMAT0000083	EIF1AY	Microarray	19088304
hsa-mir-26b-5p	MIMAT0000083	EIF2AK3	Microarray	19088304
hsa-mir-26b-5p	MIMAT0000083	EIF2B1	Microarray	19088304
hsa-mir-130b-5p	MIMAT0004680	EIF2S1	HITS-CLIP//PAR-CLIP	21572407|23824327
hsa-let-7e-5p	MIMAT0000066	EIF3J	Luciferase reporter assay//Reporter assay	15131085
hsa-let-7e-5p	MIMAT0000066	EIF4A1	CLASH	23622248
hsa-mir-26b-5p	MIMAT0000083	EIF4A1	Microarray	19088304
hsa-let-7e-5p	MIMAT0000066	EIF4A3	HITS-CLIP	23706177
hsa-mir-26b-5p	MIMAT0000083	EIF4A3	Microarray	19088304
hsa-mir-7641	MIMAT0029782	EIF4E	HITS-CLIP	23824327
hsa-let-7e-5p	MIMAT0000066	EIF4EBP2	CLASH	23622248
hsa-mir-6069	MIMAT0023694	EIF4EBP2	HITS-CLIP	23824327
hsa-let-7e-5p	MIMAT0000066	EIF4G2	PAR-CLIP	23592263|21572407|27292025
hsa-mir-26b-5p	MIMAT0000083	EIF4G2	HITS-CLIP	22473208
hsa-mir-26b-5p	MIMAT0000083	EIF5	HITS-CLIP	22473208
hsa-mir-26b-5p	MIMAT0000083	ELAVL2	HITS-CLIP//Sequencing	20371350|22473208
hsa-mir-26b-5p	MIMAT0000083	ELAVL3	Microarray	19088304
hsa-mir-130b-5p	MIMAT0004680	ELAVL3	HITS-CLIP	23824327
hsa-mir-26b-5p	MIMAT0000083	ELF4	Microarray	19088304
hsa-let-7e-5p	MIMAT0000066	ELMSAN1	CLASH	23622248
hsa-mir-26b-5p	MIMAT0000083	ELOA2	Microarray	19088304
hsa-mir-130b-5p	MIMAT0004680	ELOB	HITS-CLIP	23824327
hsa-mir-4722-3p	MIMAT0019837	ELOC	HITS-CLIP	23824327
hsa-mir-26b-5p	MIMAT0000083	ELOVL2	Microarray	19088304
hsa-mir-26b-5p	MIMAT0000083	ELP1	Microarray	19088304
hsa-mir-130b-5p	MIMAT0004680	EMC1	CLASH	23622248
hsa-mir-26b-5p	MIMAT0000083	EMC3	Microarray	19088304
hsa-mir-26b-5p	MIMAT0000083	EMC6	Microarray	19088304
hsa-mir-26b-5p	MIMAT0000083	EMC7	Microarray	19088304
hsa-mir-4722-3p	MIMAT0019837	EMC7	HITS-CLIP	23824327|19536157
hsa-let-7e-5p	MIMAT0000066	EMILIN2	HITS-CLIP//PAR-CLIP	20371350|23706177
hsa-mir-130b-5p	MIMAT0004680	EMP2	HITS-CLIP	23824327
hsa-mir-26b-5p	MIMAT0000083	EMP3	Microarray	19088304
hsa-mir-26b-5p	MIMAT0000083	EMSY	Microarray	19088304
hsa-mir-130b-5p	MIMAT0004680	EMX2	HITS-CLIP	23824327|27418678
hsa-mir-4722-3p	MIMAT0019837	EMX2	PAR-CLIP	23708386
hsa-mir-6069	MIMAT0023694	EN1	PAR-CLIP	26701625
hsa-let-7e-5p	MIMAT0000066	EN2	CLASH	23622248
hsa-mir-26b-5p	MIMAT0000083	ENDOG	Microarray	19088304
hsa-mir-26b-5p	MIMAT0000083	ENOSF1	Microarray	19088304
hsa-mir-26b-5p	MIMAT0000083	ENOX1	Microarray	19088304
hsa-mir-130b-5p	MIMAT0004680	ENPP5	HITS-CLIP	19536157
hsa-let-7e-5p	MIMAT0000066	ENSA	CLASH	23622248
hsa-mir-130b-5p	MIMAT0004680	ENTPD5	HITS-CLIP	23824327
hsa-mir-26b-5p	MIMAT0000083	ENTPD7	Microarray	19088304
hsa-mir-26b-5p	MIMAT0000083	EP300	HITS-CLIP//Microarray	19569050|27418678
hsa-mir-130b-5p	MIMAT0004680	EP300	CLASH	23622248
hsa-mir-26b-5p	MIMAT0000083	EP400	HITS-CLIP	22473208
hsa-mir-26b-5p	MIMAT0000083	EPB41L3	PAR-CLIP	21572407
hsa-mir-7641	MIMAT0029782	EPGN	PAR-CLIP	22291592
hsa-mir-26b-5p	MIMAT0000083	EPHA2	Luciferase reporter assay//qRT-PCR//Western blot	21264258|26843134|26191168|27746866
hsa-let-7e-5p	MIMAT0000066	EPHA4	PAR-CLIP	21572407
hsa-mir-26b-5p	MIMAT0000083	EPHX1	Microarray	19088304
hsa-mir-130b-5p	MIMAT0004680	EPHX2	HITS-CLIP	23824327
hsa-mir-26b-5p	MIMAT0000083	EPPIN	Microarray	19088304
hsa-mir-130b-5p	MIMAT0004680	EPPIN	HITS-CLIP	23824327
hsa-mir-130b-5p	MIMAT0004680	EPPIN-WFDC6	HITS-CLIP	23824327
hsa-mir-26b-5p	MIMAT0000083	ERAP1	Microarray	19088304
hsa-mir-26b-5p	MIMAT0000083	ERAP2	Microarray	19088304
hsa-mir-26b-5p	MIMAT0000083	ERBIN	Microarray	19088304
hsa-mir-26b-5p	MIMAT0000083	ERC1	Microarray	19088304
hsa-mir-5008-3p	MIMAT0021040	ERCC1	PAR-CLIP	27292025
hsa-mir-26b-5p	MIMAT0000083	ERCC6L	Microarray	19088304
hsa-mir-4722-3p	MIMAT0019837	ERCC6L2	PAR-CLIP	27292025
hsa-mir-26b-5p	MIMAT0000083	ERCC8	Microarray	19088304
hsa-mir-26b-5p	MIMAT0000083	ERI2	Microarray	19088304
hsa-let-7e-5p	MIMAT0000066	ERO1A	PAR-CLIP	26701625
hsa-let-7e-5p	MIMAT0000066	ESPL1	PAR-CLIP	23446348|21572407
hsa-mir-4722-3p	MIMAT0019837	ESYT2	HITS-CLIP	21572407
hsa-mir-26b-5p	MIMAT0000083	ETF1	PAR-CLIP	23592263|23446348|27292025
hsa-mir-4722-3p	MIMAT0019837	ETFDH	PAR-CLIP	27292025
hsa-mir-7641	MIMAT0029782	ETNK1	PAR-CLIP	21572407
hsa-mir-4722-3p	MIMAT0019837	ETV3	HITS-CLIP	28735896
hsa-mir-26b-5p	MIMAT0000083	ETV4	Microarray	19088304
hsa-mir-26b-5p	MIMAT0000083	EVI2A	Microarray	19088304
hsa-mir-7641	MIMAT0029782	EXO5	HITS-CLIP	23824327
hsa-mir-130b-5p	MIMAT0004680	EXOC5	HITS-CLIP	23824327
hsa-mir-26b-5p	MIMAT0000083	EXOC6B	Microarray	19088304
hsa-mir-130b-5p	MIMAT0004680	EXOC7	HITS-CLIP	23824327
hsa-mir-4722-3p	MIMAT0019837	EXOG	HITS-CLIP	23824327
hsa-mir-26b-5p	MIMAT0000083	EXT2	Microarray	19088304
hsa-let-7e-5p	MIMAT0000066	EZH2	qRT-PCR//Western blot	24100610
hsa-mir-26b-5p	MIMAT0000083	EZH2	Luciferase reporter assay//Microarray//QRTPCR//Western blotting	24815696
hsa-mir-26b-5p	MIMAT0000083	F13B	Microarray	19088304
hsa-mir-26b-5p	MIMAT0000083	F3	Microarray	19088304
hsa-mir-130b-5p	MIMAT0004680	FAAP24	HITS-CLIP	23824327
hsa-mir-26b-5p	MIMAT0000083	FADS2	Microarray	19088304
hsa-mir-26b-5p	MIMAT0000083	FAF1	Microarray	19088304
hsa-mir-26b-5p	MIMAT0000083	FAHD2A	Microarray	19088304
hsa-mir-26b-5p	MIMAT0000083	FAHD2B	Microarray	19088304
hsa-let-7e-5p	MIMAT0000066	FAM104A	PAR-CLIP	20371350
hsa-let-7e-5p	MIMAT0000066	FAM105A	HITS-CLIP//PAR-CLIP	23592263|23446348|23706177
hsa-mir-26b-5p	MIMAT0000083	FAM105A	Microarray	19088304
hsa-mir-6069	MIMAT0023694	FAM107A	HITS-CLIP	27418678
hsa-mir-26b-5p	MIMAT0000083	FAM107B	Sequencing	20371350
hsa-mir-26b-5p	MIMAT0000083	FAM114A2	Microarray	19088304
hsa-mir-26b-5p	MIMAT0000083	FAM118A	Microarray	19088304
hsa-mir-4722-3p	MIMAT0019837	FAM118A	HITS-CLIP	23824327
hsa-mir-26b-5p	MIMAT0000083	FAM126B	HITS-CLIP	23313552
hsa-mir-26b-5p	MIMAT0000083	FAM135A	Microarray	19088304
hsa-mir-26b-5p	MIMAT0000083	FAM136A	Sequencing	20371350
hsa-mir-4722-3p	MIMAT0019837	FAM136A	HITS-CLIP	19536157
hsa-mir-4722-3p	MIMAT0019837	FAM151B	HITS-CLIP	23313552
hsa-mir-4722-3p	MIMAT0019837	FAM153B	HITS-CLIP	23313552
hsa-let-7e-5p	MIMAT0000066	FAM160B1	CLASH	23622248
hsa-mir-5008-3p	MIMAT0021040	FAM163A	HITS-CLIP	23824327
hsa-mir-26b-5p	MIMAT0000083	FAM168B	Microarray	19088304
hsa-mir-26b-5p	MIMAT0000083	FAM177A1	HITS-CLIP	23824327
hsa-mir-7641	MIMAT0029782	FAM180B	HITS-CLIP	23824327|23313552|27418678
hsa-mir-130b-5p	MIMAT0004680	FAM181B	HITS-CLIP	23824327
hsa-mir-26b-5p	MIMAT0000083	FAM193A	Microarray	19088304
hsa-mir-26b-5p	MIMAT0000083	FAM198B	Microarray	19088304
hsa-mir-26b-5p	MIMAT0000083	FAM208B	Microarray	19088304
hsa-mir-26b-5p	MIMAT0000083	FAM20B	Microarray	19088304
hsa-mir-92a-1-5p	MIMAT0004507	FAM20B	HITS-CLIP	19536157
hsa-mir-92a-1-5p	MIMAT0004507	FAM210A	HITS-CLIP	19536157
hsa-mir-26b-5p	MIMAT0000083	FAM212B	Microarray	19088304
hsa-let-7e-5p	MIMAT0000066	FAM219B	CLASH	23622248
hsa-let-7e-5p	MIMAT0000066	FAM222B	PAR-CLIP	21572407
hsa-mir-4722-3p	MIMAT0019837	FAM227A	HITS-CLIP	23824327
hsa-mir-4722-3p	MIMAT0019837	FAM241A	HITS-CLIP	23824327
hsa-mir-26b-5p	MIMAT0000083	FAM3A	Microarray	19088304
hsa-let-7e-5p	MIMAT0000066	FAM43A	PAR-CLIP	23592263|20371350
hsa-mir-92a-1-5p	MIMAT0004507	FAM49A	PAR-CLIP	27292025
hsa-mir-26b-5p	MIMAT0000083	FAM49B	Sequencing	20371350
hsa-mir-130b-5p	MIMAT0004680	FAM53B	HITS-CLIP	23824327
hsa-mir-7641	MIMAT0029782	FAM71F2	HITS-CLIP	23824327
hsa-mir-130b-5p	MIMAT0004680	FAM72A	CLASH	23622248
hsa-mir-130b-5p	MIMAT0004680	FAM83D	HITS-CLIP	27418678
hsa-mir-7641	MIMAT0029782	FAM83F	PAR-CLIP	27292025
hsa-let-7e-5p	MIMAT0000066	FAM83G	PAR-CLIP	23592263|24398324
hsa-mir-26b-5p	MIMAT0000083	FAM98A	Microarray	19088304
hsa-mir-130b-5p	MIMAT0004680	FAM9C	HITS-CLIP	23824327
hsa-mir-26b-5p	MIMAT0000083	FANCC	Microarray	19088304
hsa-mir-4722-3p	MIMAT0019837	FANCM	HITS-CLIP	23313552
hsa-mir-26b-5p	MIMAT0000083	FARP1	Microarray	19088304
hsa-mir-92a-1-5p	MIMAT0004507	FAS	qRT-PCR	24955218
hsa-let-7e-5p	MIMAT0000066	FASLG	Luciferase reporter assay	26826505
hsa-mir-26b-5p	MIMAT0000083	FASLG	Microarray	19088304
hsa-mir-130b-5p	MIMAT0004680	FASN	CLASH	23622248
hsa-mir-26b-5p	MIMAT0000083	FAXC	HITS-CLIP	23824327
hsa-mir-26b-5p	MIMAT0000083	FBLN5	Microarray	19088304
hsa-mir-130b-5p	MIMAT0004680	FBXL16	HITS-CLIP	23824327
hsa-let-7e-5p	MIMAT0000066	FBXL20	PAR-CLIP	21572407
hsa-mir-26b-5p	MIMAT0000083	FBXL6	Microarray	19088304
hsa-mir-26b-5p	MIMAT0000083	FBXO11	HITS-CLIP//Sequencing	20371350|22473208
hsa-mir-26b-5p	MIMAT0000083	FBXO24	Microarray	19088304
hsa-mir-26b-5p	MIMAT0000083	FBXO28	Microarray	19088304
hsa-mir-26b-5p	MIMAT0000083	FBXO3	Microarray	19088304
hsa-mir-4722-3p	MIMAT0019837	FBXO47	HITS-CLIP	23824327
hsa-mir-26b-5p	MIMAT0000083	FBXO5	Microarray	19088304
hsa-mir-130b-5p	MIMAT0004680	FBXO9	HITS-CLIP	23824327
hsa-let-7e-5p	MIMAT0000066	FBXW2	PAR-CLIP	23446348|20371350
hsa-mir-92a-1-5p	MIMAT0004507	FBXW7	PAR-CLIP	26701625|27292025
hsa-mir-4722-3p	MIMAT0019837	FCAR	PAR-CLIP	27292025
hsa-mir-26b-5p	MIMAT0000083	FCGR1B	Microarray	19088304
hsa-mir-26b-5p	MIMAT0000083	FCN2	Microarray	19088304
hsa-mir-26b-5p	MIMAT0000083	FDFT1	Microarray	19088304
hsa-mir-4722-3p	MIMAT0019837	FDFT1	HITS-CLIP	27418678
hsa-let-7e-5p	MIMAT0000066	FDPS	CLASH	23622248
hsa-mir-26b-5p	MIMAT0000083	FDXR	Microarray	19088304
hsa-mir-4722-3p	MIMAT0019837	FEM1A	HITS-CLIP	23313552
hsa-mir-26b-5p	MIMAT0000083	FES	Microarray	19088304
hsa-mir-130b-5p	MIMAT0004680	FGF1	HITS-CLIP	19536157
hsa-mir-6069	MIMAT0023694	FGF1	HITS-CLIP	19536157
hsa-mir-26b-5p	MIMAT0000083	FGF23	Microarray	19088304
hsa-mir-26b-5p	MIMAT0000083	FGF9	Microarray	19088304
hsa-mir-130b-5p	MIMAT0004680	FGFR1OP	HITS-CLIP	19536157
hsa-mir-4722-3p	MIMAT0019837	FGFR1OP	HITS-CLIP	23824327
hsa-mir-26b-5p	MIMAT0000083	FGFR3	Microarray	19088304
hsa-mir-26b-5p	MIMAT0000083	FGGY	Microarray	19088304
hsa-mir-26b-5p	MIMAT0000083	FGL2	Microarray	19088304
hsa-mir-26b-5p	MIMAT0000083	FH	Luciferase reporter assay//qRT-PCR//Western blot	26078955
hsa-mir-26b-5p	MIMAT0000083	FHL5	Microarray	19088304
hsa-mir-26b-5p	MIMAT0000083	FICD	Microarray	19088304
hsa-mir-26b-5p	MIMAT0000083	FIG4	Microarray	19088304
hsa-mir-4722-3p	MIMAT0019837	FIG4	HITS-CLIP	23824327
hsa-let-7e-5p	MIMAT0000066	FIGN	HITS-CLIP//PAR-CLIP	23446348|21572407|20371350|23706177
hsa-mir-130b-5p	MIMAT0004680	FIZ1	PAR-CLIP	23592263
hsa-mir-26b-5p	MIMAT0000083	FKBP14	Microarray	19088304
hsa-mir-4722-3p	MIMAT0019837	FKBP14	HITS-CLIP	23824327
hsa-mir-7641	MIMAT0029782	FKBP14	HITS-CLIP	23313552
hsa-mir-26b-5p	MIMAT0000083	FKBP1B	Sequencing	20371350
hsa-mir-26b-5p	MIMAT0000083	FKBP2	Microarray	19088304
hsa-mir-26b-5p	MIMAT0000083	FKBP9	Microarray	19088304
hsa-mir-26b-5p	MIMAT0000083	FKBP9P1	Microarray	19088304
hsa-mir-26b-5p	MIMAT0000083	FKRP	Microarray	19088304
hsa-mir-26b-5p	MIMAT0000083	FKTN	HITS-CLIP//Microarray	19088304|23824327
hsa-mir-4722-3p	MIMAT0019837	FKTN	HITS-CLIP	23824327
hsa-mir-7641	MIMAT0029782	FLYWCH2	HITS-CLIP	23824327
hsa-let-7e-5p	MIMAT0000066	FMNL3	PAR-CLIP	22100165
hsa-mir-26b-5p	MIMAT0000083	FMO3	Microarray	19088304
hsa-let-7e-5p	MIMAT0000066	FMO4	HITS-CLIP	23824327
hsa-mir-26b-5p	MIMAT0000083	FN1	Microarray	19088304
hsa-let-7e-5p	MIMAT0000066	FNDC3A	PAR-CLIP	23592263
hsa-mir-26b-5p	MIMAT0000083	FNDC3B	Microarray	19088304
hsa-let-7e-5p	MIMAT0000066	FNDC9	PAR-CLIP	26701625
hsa-mir-26b-5p	MIMAT0000083	FOLH1	Microarray	19088304
hsa-mir-26b-5p	MIMAT0000083	FOLR2	Microarray	19088304
hsa-mir-92a-1-5p	MIMAT0004507	FOSL1	PAR-CLIP	26701625
hsa-mir-26b-5p	MIMAT0000083	FOXD2	Microarray	19088304
hsa-let-7e-5p	MIMAT0000066	FOXD4L6	CLASH	23622248
hsa-mir-26b-5p	MIMAT0000083	FOXE1	Microarray	19088304
hsa-mir-26b-5p	MIMAT0000083	FOXF2	Microarray	19088304
hsa-mir-26b-5p	MIMAT0000083	FOXG1	Microarray	19088304
hsa-mir-26b-5p	MIMAT0000083	FOXM1	Microarray	19088304
hsa-mir-130b-5p	MIMAT0004680	FOXO1	HITS-CLIP	23824327
hsa-mir-4722-3p	MIMAT0019837	FOXO3	HITS-CLIP	23824327
hsa-mir-6069	MIMAT0023694	FOXO3	PAR-CLIP	21572407|20371350
hsa-let-7e-5p	MIMAT0000066	FPR1	HITS-CLIP	23313552
hsa-mir-26b-5p	MIMAT0000083	FPR1	HITS-CLIP	23824327
hsa-mir-4722-3p	MIMAT0019837	FPR1	HITS-CLIP	19536157
hsa-mir-26b-5p	MIMAT0000083	FRAT2	PAR-CLIP	24398324|21572407|20371350
hsa-mir-130b-5p	MIMAT0004680	FRMD6	HITS-CLIP	23824327
hsa-mir-4722-3p	MIMAT0019837	FRMD8	HITS-CLIP	23824327
hsa-mir-26b-5p	MIMAT0000083	FRS3	Microarray	19088304
hsa-mir-7641	MIMAT0029782	FSD2	HITS-CLIP	23824327
hsa-mir-130b-5p	MIMAT0004680	FSIP2	HITS-CLIP	23824327
hsa-mir-26b-5p	MIMAT0000083	FSTL1	Microarray	19088304
hsa-mir-4722-3p	MIMAT0019837	FTCD	HITS-CLIP	19536157
hsa-mir-26b-5p	MIMAT0000083	FTH1	Microarray	19088304
hsa-let-7e-5p	MIMAT0000066	FUT10	PAR-CLIP	23592263|26701625
hsa-mir-130b-5p	MIMAT0004680	FUT11	HITS-CLIP	23824327
hsa-mir-26b-5p	MIMAT0000083	FUT8	Microarray	19088304
hsa-let-7e-5p	MIMAT0000066	FXN	PAR-CLIP	23592263
hsa-mir-130b-5p	MIMAT0004680	FZD2	HITS-CLIP	19536157
hsa-mir-26b-5p	MIMAT0000083	FZD5	Microarray	19088304
hsa-let-7e-5p	MIMAT0000066	FZD9	PAR-CLIP	23446348|21572407
hsa-mir-4722-3p	MIMAT0019837	G3BP1	PAR-CLIP	23592263|21572407
hsa-mir-26b-5p	MIMAT0000083	G3BP2	Sequencing	20371350
hsa-mir-26b-5p	MIMAT0000083	G6PD	Microarray	19088304
hsa-mir-26b-5p	MIMAT0000083	GABARAP	Microarray	19088304
hsa-mir-26b-5p	MIMAT0000083	GABBR1	Microarray	19088304
hsa-let-7e-5p	MIMAT0000066	GABPB1	HITS-CLIP//PAR-CLIP	23592263|23313552
hsa-mir-4722-3p	MIMAT0019837	GABPB2	PAR-CLIP	27292025
hsa-mir-26b-5p	MIMAT0000083	GABRA3	Microarray	19088304
hsa-mir-26b-5p	MIMAT0000083	GABRB3	Microarray	19088304
hsa-mir-26b-5p	MIMAT0000083	GABRE	Microarray	19088304
hsa-mir-26b-5p	MIMAT0000083	GABRG3	Microarray	19088304
hsa-mir-26b-5p	MIMAT0000083	GADD45A	Microarray	19088304
hsa-mir-26b-5p	MIMAT0000083	GADD45GIP1	Microarray	19088304
hsa-mir-26b-5p	MIMAT0000083	GAL3ST1	Microarray	19088304
hsa-mir-26b-5p	MIMAT0000083	GALK1	Microarray	19088304
hsa-mir-26b-5p	MIMAT0000083	GALNT11	Microarray	19088304
hsa-mir-130b-5p	MIMAT0004680	GALNT13	HITS-CLIP	23824327
hsa-mir-4722-3p	MIMAT0019837	GALNT17	HITS-CLIP	23824327|19536157
hsa-mir-26b-5p	MIMAT0000083	GALNT3	PAR-CLIP	22012620
hsa-mir-1244	MIMAT0005896	GALNT3	PAR-CLIP	22012620
hsa-mir-4722-3p	MIMAT0019837	GALNT6	HITS-CLIP	23824327
hsa-mir-26b-5p	MIMAT0000083	GALNT7	Microarray	19088304
hsa-mir-130b-5p	MIMAT0004680	GALR1	HITS-CLIP	19536157
hsa-mir-26b-5p	MIMAT0000083	GALR2	Microarray	19088304
hsa-mir-26b-5p	MIMAT0000083	GALR3	Microarray	19088304
hsa-mir-26b-5p	MIMAT0000083	GALT	Microarray	19088304
hsa-mir-92a-1-5p	MIMAT0004507	GAN	PAR-CLIP	26701625
hsa-mir-26b-5p	MIMAT0000083	GAS2	Microarray	19088304
hsa-mir-26b-5p	MIMAT0000083	GATA2	Microarray	19088304
hsa-mir-26b-5p	MIMAT0000083	GATA4	Immunocytochemistry//Luciferase reporter assay//Northern blot//qRT-PCR//Western blot	22219180
hsa-mir-6069	MIMAT0023694	GATAD2B	HITS-CLIP	23313552
hsa-let-7e-5p	MIMAT0000066	GATB	CLASH	23622248
hsa-mir-4722-3p	MIMAT0019837	GATC	HITS-CLIP	23824327
hsa-let-7e-5p	MIMAT0000066	GATM	PAR-CLIP	26701625
hsa-mir-26b-5p	MIMAT0000083	GBP2	Microarray	19088304
hsa-mir-4722-3p	MIMAT0019837	GBP4	HITS-CLIP	23824327
hsa-mir-26b-5p	MIMAT0000083	GCH1	Microarray	19088304
hsa-mir-26b-5p	MIMAT0000083	GCNT2	Microarray	19088304
hsa-mir-26b-5p	MIMAT0000083	GDAP1	Microarray	19088304
hsa-mir-130b-5p	MIMAT0004680	GDAP1L1	HITS-CLIP	23824327
hsa-mir-26b-5p	MIMAT0000083	GDE1	Microarray	19088304
hsa-mir-5008-3p	MIMAT0021040	GDE1	PAR-CLIP	21572407
hsa-mir-26b-5p	MIMAT0000083	GDF10	Microarray	19088304
hsa-mir-26b-5p	MIMAT0000083	GDF11	Microarray	19088304
hsa-mir-26b-5p	MIMAT0000083	GDI1	Microarray	19088304
hsa-mir-26b-5p	MIMAT0000083	GEM	Microarray	19088304
hsa-mir-26b-5p	MIMAT0000083	GFOD1	Sequencing	20371350
hsa-mir-26b-5p	MIMAT0000083	GFOD2	Microarray	19088304
hsa-let-7e-5p	MIMAT0000066	GGA3	PAR-CLIP	24398324
hsa-mir-26b-5p	MIMAT0000083	GGA3	Sequencing	20371350
hsa-mir-26b-5p	MIMAT0000083	GGH	Microarray	19088304
hsa-mir-4722-3p	MIMAT0019837	GGPS1	HITS-CLIP	23824327
hsa-mir-26b-5p	MIMAT0000083	GHSR	Microarray	19088304
hsa-mir-26b-5p	MIMAT0000083	GID4	Microarray	19088304
hsa-mir-130b-5p	MIMAT0004680	GIN1	HITS-CLIP	23824327
hsa-mir-7641	MIMAT0029782	GINM1	HITS-CLIP	23824327
hsa-mir-26b-5p	MIMAT0000083	GINS1	Microarray	19088304
hsa-mir-4722-3p	MIMAT0019837	GINS2	HITS-CLIP	23824327
hsa-mir-26b-5p	MIMAT0000083	GINS4	Microarray	19088304
hsa-mir-26b-5p	MIMAT0000083	GJA5	Microarray	19088304
hsa-mir-4722-3p	MIMAT0019837	GJA9	HITS-CLIP	27418678
hsa-mir-4722-3p	MIMAT0019837	GJC1	PAR-CLIP	27292025
hsa-mir-130b-5p	MIMAT0004680	GJD2	HITS-CLIP	23824327
hsa-mir-4722-3p	MIMAT0019837	GJD3	HITS-CLIP	23824327
hsa-mir-130b-5p	MIMAT0004680	GK5	HITS-CLIP	23824327|23706177|27418678
hsa-mir-4722-3p	MIMAT0019837	GK5	HITS-CLIP	23824327
hsa-mir-26b-5p	MIMAT0000083	GKN1	Microarray	19088304
hsa-mir-5008-3p	MIMAT0021040	GLDN	PAR-CLIP	22291592
hsa-mir-7641	MIMAT0029782	GLG1	HITS-CLIP	19536157
hsa-mir-26b-5p	MIMAT0000083	GLI2	Microarray	19088304
hsa-let-7e-5p	MIMAT0000066	GLO1	PAR-CLIP	23592263
hsa-mir-26b-5p	MIMAT0000083	GLRX	Microarray	19088304
hsa-mir-26b-5p	MIMAT0000083	GLRX2	Microarray	19088304
hsa-mir-26b-5p	MIMAT0000083	GLTP	HITS-CLIP	23824327
hsa-let-7e-5p	MIMAT0000066	GLUL	CLASH	23622248
hsa-mir-4722-3p	MIMAT0019837	GMEB1	PAR-CLIP	27292025
hsa-mir-26b-5p	MIMAT0000083	GMNN	Microarray	19088304
hsa-mir-4722-3p	MIMAT0019837	GMPR	HITS-CLIP	24906430
hsa-let-7e-5p	MIMAT0000066	GMPS	CLASH	23622248
hsa-mir-26b-5p	MIMAT0000083	GNA13	Microarray	19088304
hsa-mir-26b-5p	MIMAT0000083	GNB3	Microarray	19088304
hsa-mir-26b-5p	MIMAT0000083	GNB5	Microarray	19088304
hsa-mir-4722-3p	MIMAT0019837	GNB5	HITS-CLIP	23824327
hsa-mir-7641	MIMAT0029782	GNE	HITS-CLIP	23313552
hsa-let-7e-5p	MIMAT0000066	GNG5	CLASH//PAR-CLIP	23622248|20371350|27292025
hsa-mir-26b-5p	MIMAT0000083	GNL3	Microarray	19088304
hsa-mir-4722-3p	MIMAT0019837	GNL3L	HITS-CLIP	23824327
hsa-mir-7641	MIMAT0029782	GNPNAT1	HITS-CLIP	23824327
hsa-mir-26b-5p	MIMAT0000083	GNRHR	Microarray	19088304
hsa-mir-4722-3p	MIMAT0019837	GOLGA2	HITS-CLIP//PAR-CLIP	23824327|27292025
hsa-let-7e-5p	MIMAT0000066	GOLGA4	PAR-CLIP	20371350
hsa-mir-7641	MIMAT0029782	GOLGA7B	PAR-CLIP	20371350
hsa-mir-130b-5p	MIMAT0004680	GOSR2	HITS-CLIP	23824327|19536157
hsa-mir-7641	MIMAT0029782	GOT1	PAR-CLIP	22291592
hsa-mir-26b-5p	MIMAT0000083	GP1BB	Microarray	19088304
hsa-mir-26b-5p	MIMAT0000083	GPALPP1	Microarray	19088304
hsa-let-7e-5p	MIMAT0000066	GPAT4	PAR-CLIP	26701625
hsa-mir-26b-5p	MIMAT0000083	GPATCH2	Microarray	19088304
hsa-mir-26b-5p	MIMAT0000083	GPBP1L1	Microarray	19088304
hsa-mir-26b-5p	MIMAT0000083	GPC4	Microarray	19088304
hsa-mir-130b-5p	MIMAT0004680	GPC5	HITS-CLIP	23824327
hsa-let-7e-5p	MIMAT0000066	GPM6B	CLASH	23622248
hsa-mir-4722-3p	MIMAT0019837	GPN1	PAR-CLIP	27292025
hsa-mir-4722-3p	MIMAT0019837	GPN2	HITS-CLIP//PAR-CLIP	23313552|27292025
hsa-mir-26b-5p	MIMAT0000083	GPNMB	Microarray	19088304
hsa-mir-26b-5p	MIMAT0000083	GPR1	Microarray	19088304
hsa-mir-26b-5p	MIMAT0000083	GPR107	Microarray	19088304
hsa-mir-26b-5p	MIMAT0000083	GPR135	Microarray	19088304
hsa-mir-5008-3p	MIMAT0021040	GPR137B	PAR-CLIP	20371350
hsa-mir-130b-5p	MIMAT0004680	GPR155	HITS-CLIP	19536157
hsa-mir-26b-5p	MIMAT0000083	GPR17	Microarray	19088304
hsa-mir-26b-5p	MIMAT0000083	GPR183	Microarray	19088304
hsa-mir-26b-5p	MIMAT0000083	GPR22	Microarray	19088304
hsa-mir-26b-5p	MIMAT0000083	GPR27	Microarray	19088304
hsa-mir-26b-5p	MIMAT0000083	GPR39	Microarray	19088304
hsa-mir-26b-5p	MIMAT0000083	GPR63	Microarray	19088304
hsa-mir-26b-5p	MIMAT0000083	GPRC5A	Microarray	19088304
hsa-mir-26b-5p	MIMAT0000083	GPX4	Microarray	19088304
hsa-mir-26b-5p	MIMAT0000083	GRB14	Microarray	19088304
hsa-mir-26b-5p	MIMAT0000083	GRB7	Microarray	19088304
hsa-mir-26b-5p	MIMAT0000083	GREB1	Microarray	19088304
hsa-mir-26b-5p	MIMAT0000083	GREB1L	Microarray	19088304
hsa-mir-26b-5p	MIMAT0000083	GREM2	Microarray	19088304
hsa-mir-26b-5p	MIMAT0000083	GRHL2	Microarray	19088304
hsa-mir-26b-5p	MIMAT0000083	GRIK2	Microarray	19088304
hsa-mir-130b-5p	MIMAT0004680	GRIN2A	HITS-CLIP	19536157
hsa-mir-26b-5p	MIMAT0000083	GRK2	PAR-CLIP	27292025
hsa-mir-4722-3p	MIMAT0019837	GRK3	HITS-CLIP	23824327
hsa-mir-4722-3p	MIMAT0019837	GRK4	HITS-CLIP	23824327
hsa-mir-4722-3p	MIMAT0019837	GRM6	HITS-CLIP//PAR-CLIP	23824327|27292025
hsa-mir-26b-5p	MIMAT0000083	GRM8	Microarray	19088304
hsa-let-7e-5p	MIMAT0000066	GRPEL2	PAR-CLIP	23592263|24398324|23446348|21572407|20371350|26701625
hsa-mir-26b-5p	MIMAT0000083	GRTP1	Microarray	19088304
hsa-mir-26b-5p	MIMAT0000083	GRWD1	Microarray	19088304
hsa-mir-26b-5p	MIMAT0000083	GSK3B	PAR-CLIP	21572407|20371350
hsa-mir-26b-5p	MIMAT0000083	GSPT2	Microarray	19088304
hsa-mir-26b-5p	MIMAT0000083	GSR	Sequencing	20371350
hsa-mir-4722-3p	MIMAT0019837	GSR	HITS-CLIP	23824327|19536157
hsa-mir-26b-5p	MIMAT0000083	GSTA1	Microarray	19088304
hsa-mir-7641	MIMAT0029782	GSTM3	HITS-CLIP	23824327
hsa-mir-26b-5p	MIMAT0000083	GSTP1	Microarray	19088304
hsa-mir-26b-5p	MIMAT0000083	GSTT2	Microarray	19088304
hsa-mir-26b-5p	MIMAT0000083	GSTT2B	Microarray	19088304
hsa-mir-4722-3p	MIMAT0019837	GTDC1	HITS-CLIP	23824327|19536157
hsa-mir-26b-5p	MIMAT0000083	GTF2A1	PAR-CLIP	23592263|24398324|22012620|20371350
hsa-mir-92a-1-5p	MIMAT0004507	GTF2A1	PAR-CLIP	21572407
hsa-mir-26b-5p	MIMAT0000083	GTF2A2	Microarray	19088304
hsa-mir-4722-3p	MIMAT0019837	GTF2H2	HITS-CLIP	23824327
hsa-mir-4722-3p	MIMAT0019837	GTF2H2C	HITS-CLIP	23824327
hsa-mir-4722-3p	MIMAT0019837	GTF2H5	HITS-CLIP	23824327
hsa-mir-7641	MIMAT0029782	GTF2H5	HITS-CLIP//PAR-CLIP	22291592|19536157
hsa-let-7e-5p	MIMAT0000066	GTF2I	CLASH	23622248
hsa-mir-26b-5p	MIMAT0000083	GTF2IRD2	Microarray	19088304
hsa-mir-26b-5p	MIMAT0000083	GTF2IRD2B	Microarray	19088304
hsa-let-7e-5p	MIMAT0000066	GTF3C1	CLASH	23622248
hsa-mir-4722-3p	MIMAT0019837	GTF3C6	PAR-CLIP	27292025
hsa-mir-26b-5p	MIMAT0000083	GTPBP4	Microarray	19088304
hsa-mir-92a-1-5p	MIMAT0004507	GTPBP4	CLASH	23622248
hsa-let-7e-5p	MIMAT0000066	GTPBP8	CLASH	23622248
hsa-mir-26b-5p	MIMAT0000083	GUF1	Microarray	19088304
hsa-mir-26b-5p	MIMAT0000083	GUSB	Microarray	19088304
hsa-mir-4722-3p	MIMAT0019837	GXYLT2	HITS-CLIP	23824327
hsa-mir-26b-5p	MIMAT0000083	GYS1	Microarray	19088304
hsa-mir-26b-5p	MIMAT0000083	HADH	Microarray	19088304
hsa-mir-26b-5p	MIMAT0000083	HAGH	Microarray	19088304
hsa-let-7e-5p	MIMAT0000066	HAND1	PAR-CLIP	21572407
hsa-mir-92a-1-5p	MIMAT0004507	HAND1	PAR-CLIP	21572407
hsa-mir-26b-5p	MIMAT0000083	HAS2	Luciferase reporter assay	26887530
hsa-let-7e-5p	MIMAT0000066	HASPIN	HITS-CLIP//PAR-CLIP	21572407|20371350|23706177
hsa-mir-26b-5p	MIMAT0000083	HAUS8	HITS-CLIP//PAR-CLIP//Sequencing	20371350|22473208
hsa-mir-130b-5p	MIMAT0004680	HBS1L	CLASH	23622248
hsa-mir-4722-3p	MIMAT0019837	HCFC1	PAR-CLIP	20371350
hsa-mir-130b-5p	MIMAT0004680	HCFC2	HITS-CLIP	23824327
hsa-mir-26b-5p	MIMAT0000083	HDAC5	Microarray	19088304
hsa-mir-5008-3p	MIMAT0021040	HDAC7	PAR-CLIP	26701625
hsa-mir-92a-1-5p	MIMAT0004507	HDGF	PAR-CLIP	23592263|26701625
hsa-mir-26b-5p	MIMAT0000083	HECA	Microarray	19088304
hsa-mir-26b-5p	MIMAT0000083	HECTD3	HITS-CLIP//Microarray	19088304|22473208
hsa-mir-130b-5p	MIMAT0004680	HELZ	CLASH	23622248
hsa-let-7e-5p	MIMAT0000066	HERPUD1	HITS-CLIP//PAR-CLIP	23592263|23706177
hsa-mir-26b-5p	MIMAT0000083	HERPUD1	Microarray	19088304
hsa-mir-26b-5p	MIMAT0000083	HEXA	Microarray	19088304
hsa-mir-26b-5p	MIMAT0000083	HEXB	Microarray	19088304
hsa-mir-7641	MIMAT0029782	HEYL	HITS-CLIP	23824327
hsa-mir-26b-5p	MIMAT0000083	HGD	Microarray	19088304
hsa-mir-26b-5p	MIMAT0000083	HGF	ELISA//Immunohistochemistry//Luciferase reporter assay//qRT-PCR//Western blot	28393839
hsa-mir-130b-5p	MIMAT0004680	HHIP	HITS-CLIP	23824327
hsa-mir-26b-5p	MIMAT0000083	HHLA3	Microarray	19088304
hsa-let-7e-5p	MIMAT0000066	HIF1AN	CLASH	23622248
hsa-mir-7641	MIMAT0029782	HIF1AN	HITS-CLIP	23824327
hsa-mir-4722-3p	MIMAT0019837	HINFP	HITS-CLIP	23824327
hsa-mir-7641	MIMAT0029782	HINFP	HITS-CLIP	23824327
hsa-mir-130b-5p	MIMAT0004680	HIP1	HITS-CLIP	23824327
hsa-let-7e-5p	MIMAT0000066	HIPK1	CLASH	23622248
hsa-mir-26b-5p	MIMAT0000083	HIPK1	Microarray	19088304
hsa-mir-26b-5p	MIMAT0000083	HIST1H1D	Microarray	19088304
hsa-mir-26b-5p	MIMAT0000083	HIST1H2BC	Microarray	19088304
hsa-let-7e-5p	MIMAT0000066	HIST1H2BD	PAR-CLIP	24398324|23446348
hsa-mir-26b-5p	MIMAT0000083	HIST1H2BI	Microarray	19088304
hsa-mir-4722-3p	MIMAT0019837	HIST1H2BJ	HITS-CLIP	23824327
hsa-let-7e-5p	MIMAT0000066	HIST1H2BK	PAR-CLIP	23592263|27292025
hsa-mir-92a-1-5p	MIMAT0004507	HIST1H3D	PAR-CLIP	23446348
hsa-let-7e-5p	MIMAT0000066	HIST2H2BF	CLASH	23622248
hsa-mir-26b-5p	MIMAT0000083	HIST2H2BF	Microarray	19088304
hsa-mir-26b-5p	MIMAT0000083	HIST2H4A	Microarray	19088304
hsa-mir-26b-5p	MIMAT0000083	HIST2H4B	Microarray	19088304
hsa-mir-26b-5p	MIMAT0000083	HIVEP3	CLASH	23622248
hsa-mir-130b-5p	MIMAT0004680	HIVEP3	HITS-CLIP	23824327
hsa-let-7e-5p	MIMAT0000066	HLA-C	CLASH	23622248
hsa-mir-130b-5p	MIMAT0004680	HLA-DOA	PAR-CLIP	22100165
hsa-mir-26b-5p	MIMAT0000083	HLA-DQB2	Microarray	19088304
hsa-mir-4722-3p	MIMAT0019837	HM13	HITS-CLIP	23824327
hsa-let-7e-5p	MIMAT0000066	HMGA1	HITS-CLIP//PAR-CLIP	23592263|23313552
hsa-mir-92a-1-5p	MIMAT0004507	HMGA1	PAR-CLIP	26701625
hsa-mir-4722-3p	MIMAT0019837	HMGA1	PAR-CLIP	26701625
hsa-let-7e-5p	MIMAT0000066	HMGA2	HITS-CLIP//Luciferase reporter assay//PAR-CLIP//qRT-PCR	17437991|20371350|21572407|26701625
hsa-mir-1244	MIMAT0005896	HMGA2	HITS-CLIP//PAR-CLIP	23446348|20371350|21572407|26701625
hsa-let-7e-5p	MIMAT0000066	HMGB1	CLASH	23622248
hsa-mir-26b-5p	MIMAT0000083	HMGB1	CLASH	23622248
hsa-mir-4722-3p	MIMAT0019837	HMGB1	HITS-CLIP	23824327
hsa-mir-26b-5p	MIMAT0000083	HMGN5	Microarray	19088304
hsa-mir-26b-5p	MIMAT0000083	HMOX1	Microarray	19088304
hsa-mir-26b-5p	MIMAT0000083	HNRNPA0	HITS-CLIP	22473208
hsa-mir-4722-3p	MIMAT0019837	HNRNPA1	HITS-CLIP	23313552
hsa-mir-5008-3p	MIMAT0021040	HNRNPA1	HITS-CLIP	23313552
hsa-mir-4722-3p	MIMAT0019837	HNRNPA1L2	HITS-CLIP	23313552
hsa-mir-5008-3p	MIMAT0021040	HNRNPA1L2	HITS-CLIP	23313552
hsa-let-7e-5p	MIMAT0000066	HNRNPC	CLASH	23622248
hsa-mir-26b-5p	MIMAT0000083	HNRNPM	Microarray	19088304
hsa-mir-130b-5p	MIMAT0004680	HNRNPR	CLASH	23622248
hsa-let-7e-5p	MIMAT0000066	HNRNPUL1	CLASH	23622248
hsa-mir-92a-1-5p	MIMAT0004507	HNRNPUL1	PAR-CLIP	23592263
hsa-mir-92a-1-5p	MIMAT0004507	HOXA7	PAR-CLIP	26701625
hsa-mir-26b-5p	MIMAT0000083	HOXA9	Sequencing	20371350
hsa-mir-26b-5p	MIMAT0000083	HOXB1	Microarray	19088304
hsa-mir-26b-5p	MIMAT0000083	HOXB7	Microarray	19088304
hsa-mir-26b-5p	MIMAT0000083	HOXC4	Microarray	19088304
hsa-mir-6069	MIMAT0023694	HOXC8	PAR-CLIP	22291592|23446348|21572407
hsa-mir-92a-1-5p	MIMAT0004507	HOXD13	PAR-CLIP	21572407|20371350
hsa-mir-26b-5p	MIMAT0000083	HPS4	Microarray	19088304
hsa-mir-26b-5p	MIMAT0000083	HPSE	HITS-CLIP	23824327|23313552
hsa-mir-4722-3p	MIMAT0019837	HPSE	HITS-CLIP	23313552
hsa-mir-130b-5p	MIMAT0004680	HRH1	HITS-CLIP	23824327
hsa-mir-4722-3p	MIMAT0019837	HS3ST1	HITS-CLIP	23824327
hsa-let-7e-5p	MIMAT0000066	HS6ST2	CLASH	23622248
hsa-mir-1244	MIMAT0005896	HSBP1	PAR-CLIP	21572407
hsa-mir-26b-5p	MIMAT0000083	HSD11B1	Microarray	19088304
hsa-mir-26b-5p	MIMAT0000083	HSD17B11	Microarray	19088304
hsa-mir-26b-5p	MIMAT0000083	HSD17B14	Microarray	19088304
hsa-mir-26b-5p	MIMAT0000083	HSD17B2	Microarray	19088304
hsa-mir-26b-5p	MIMAT0000083	HSD3B1	Microarray	19088304
hsa-mir-26b-5p	MIMAT0000083	HSF1	Microarray	19088304
hsa-mir-26b-5p	MIMAT0000083	HSF2	Microarray	19088304
hsa-mir-26b-5p	MIMAT0000083	HSF4	Microarray	19088304
hsa-mir-1244	MIMAT0005896	HSP90AA1	PAR-CLIP	20371350
hsa-mir-26b-5p	MIMAT0000083	HSPA12A	Microarray	19088304
hsa-mir-26b-5p	MIMAT0000083	HSPA13	HITS-CLIP	22473208
hsa-mir-130b-5p	MIMAT0004680	HSPA1B	CLASH	23622248
hsa-mir-26b-5p	MIMAT0000083	HSPA1L	Microarray	19088304
hsa-mir-26b-5p	MIMAT0000083	HSPA4	Microarray	19088304
hsa-mir-7641	MIMAT0029782	HSPA4L	HITS-CLIP	23824327
hsa-mir-130b-5p	MIMAT0004680	HSPA6	HITS-CLIP	23824327
hsa-mir-26b-5p	MIMAT0000083	HSPA8	PAR-CLIP	26701625
hsa-mir-130b-5p	MIMAT0004680	HSPA8	CLASH	23622248
hsa-mir-26b-5p	MIMAT0000083	HSPB7	Microarray	19088304
hsa-mir-26b-5p	MIMAT0000083	HSPD1	HITS-CLIP	23824327
hsa-mir-4722-3p	MIMAT0019837	HSPE1-MOB4	HITS-CLIP	23824327
hsa-mir-26b-5p	MIMAT0000083	HTRA1	Microarray	19088304
hsa-mir-26b-5p	MIMAT0000083	HTT	Microarray	19088304
hsa-mir-130b-5p	MIMAT0004680	HYPK	HITS-CLIP	23824327
hsa-mir-26b-5p	MIMAT0000083	IAPP	Microarray	19088304
hsa-mir-26b-5p	MIMAT0000083	IBSP	Microarray	19088304
hsa-mir-4722-3p	MIMAT0019837	ICA1L	HITS-CLIP	23824327
hsa-mir-26b-5p	MIMAT0000083	ICAM5	Microarray	19088304
hsa-mir-26b-5p	MIMAT0000083	ICE1	Microarray	19088304
hsa-mir-26b-5p	MIMAT0000083	ICMT	Sequencing	20371350
hsa-let-7e-5p	MIMAT0000066	ICOSLG	PAR-CLIP	23592263
hsa-mir-26b-5p	MIMAT0000083	ID1	Microarray	19088304
hsa-mir-26b-5p	MIMAT0000083	IDH2	Microarray	19088304
hsa-mir-26b-5p	MIMAT0000083	IDI1	Microarray	19088304
hsa-mir-551a	MIMAT0003214	IER3	PAR-CLIP	26701625
hsa-mir-26b-5p	MIMAT0000083	IER5	Microarray	19088304
hsa-mir-26b-5p	MIMAT0000083	IFI16	Microarray	19088304
hsa-mir-26b-5p	MIMAT0000083	IFI44	Microarray	19088304
hsa-mir-26b-5p	MIMAT0000083	IFIH1	Microarray	19088304
hsa-mir-26b-5p	MIMAT0000083	IFITM3	Microarray	19088304
hsa-mir-26b-5p	MIMAT0000083	IFNG	Microarray	19088304
hsa-mir-26b-5p	MIMAT0000083	IFNGR2	Microarray	19088304
hsa-let-7e-5p	MIMAT0000066	IFNLR1	PAR-CLIP	23592263
hsa-mir-26b-5p	MIMAT0000083	IFRD1	Microarray	19088304
hsa-mir-26b-5p	MIMAT0000083	IFRD2	Microarray	19088304
hsa-mir-4722-3p	MIMAT0019837	IFT22	PAR-CLIP	27292025
hsa-let-7e-5p	MIMAT0000066	IGDCC4	PAR-CLIP	23446348|21572407|20371350|26701625
hsa-let-7e-5p	MIMAT0000066	IGF1	Luciferase reporter assay//qRT-PCR//Western blot	24582811
hsa-mir-26b-5p	MIMAT0000083	IGF1	Luciferase reporter assay	26847596
hsa-mir-130b-5p	MIMAT0004680	IGF1	PAR-CLIP	22012620
hsa-mir-7641	MIMAT0029782	IGF1	PAR-CLIP	22100165
hsa-let-7e-5p	MIMAT0000066	IGF1R	CLASH//Luciferase reporter assay//PAR-CLIP//qRT-PCR//Western blot	23622248|24582811|23592263|24398324|23446348|21572407
hsa-mir-26b-5p	MIMAT0000083	IGF1R	Luciferase reporter assay	24161401
hsa-let-7e-5p	MIMAT0000066	IGF2BP1	PAR-CLIP	21572407
hsa-let-7e-5p	MIMAT0000066	IGF2BP3	CLASH//PAR-CLIP	23622248|21572407|20371350
hsa-mir-6069	MIMAT0023694	IGF2BP3	PAR-CLIP	23592263
hsa-mir-26b-5p	MIMAT0000083	IGF2R	Microarray	19088304
hsa-mir-26b-5p	MIMAT0000083	IGFBP4	Microarray	19088304
hsa-mir-26b-5p	MIMAT0000083	IGFLR1	Microarray	19088304
hsa-mir-26b-5p	MIMAT0000083	IGHMBP2	Microarray	19088304
hsa-mir-26b-5p	MIMAT0000083	IGSF3	Microarray	19088304
hsa-mir-26b-5p	MIMAT0000083	IGSF6	Microarray	19088304
hsa-mir-7641	MIMAT0029782	IGSF6	HITS-CLIP	23824327
hsa-mir-130b-5p	MIMAT0004680	IGSF9B	HITS-CLIP	23824327
hsa-mir-26b-5p	MIMAT0000083	IKZF1	Microarray	19088304
hsa-mir-130b-5p	MIMAT0004680	IKZF2	CLASH	23622248
hsa-let-7e-5p	MIMAT0000066	IKZF3	HITS-CLIP//PAR-CLIP	23446348|23706177
hsa-mir-4722-3p	MIMAT0019837	IKZF3	HITS-CLIP	23824327
hsa-mir-26b-5p	MIMAT0000083	IL12A	Microarray	19088304
hsa-mir-26b-5p	MIMAT0000083	IL13RA2	Microarray	19088304
hsa-mir-26b-5p	MIMAT0000083	IL17RB	Microarray	19088304
hsa-mir-26b-5p	MIMAT0000083	IL17RC	Microarray	19088304
hsa-mir-4722-3p	MIMAT0019837	IL17RD	PAR-CLIP	27292025
hsa-mir-92a-1-5p	MIMAT0004507	IL1A	Microarray//qRT-PCR	26283734
hsa-mir-26b-5p	MIMAT0000083	IL1R2	Microarray	19088304
hsa-mir-26b-5p	MIMAT0000083	IL1RL1	Microarray	19088304
hsa-mir-26b-5p	MIMAT0000083	IL20RA	Microarray	19088304
hsa-mir-26b-5p	MIMAT0000083	IL22RA1	Microarray	19088304
hsa-mir-26b-5p	MIMAT0000083	IL3	Microarray	19088304
hsa-mir-26b-5p	MIMAT0000083	IL36RN	Microarray	19088304
hsa-let-7e-5p	MIMAT0000066	IL6R	PAR-CLIP	27292025
hsa-mir-4722-3p	MIMAT0019837	IL6R	PAR-CLIP	23446348
hsa-mir-7641	MIMAT0029782	IL6R	HITS-CLIP	19536157
hsa-mir-26b-5p	MIMAT0000083	IL7R	Microarray	19088304
hsa-mir-26b-5p	MIMAT0000083	IMP3	Microarray	19088304
hsa-mir-4722-3p	MIMAT0019837	IMP4	HITS-CLIP//PAR-CLIP	23824327|27292025
hsa-mir-26b-5p	MIMAT0000083	IMPG1	Microarray	19088304
hsa-mir-26b-5p	MIMAT0000083	ING2	Microarray	19088304
hsa-mir-5008-3p	MIMAT0021040	ING5	HITS-CLIP	23824327
hsa-mir-26b-5p	MIMAT0000083	INHA	Microarray	19088304
hsa-mir-4722-3p	MIMAT0019837	INO80	HITS-CLIP	23824327
hsa-mir-26b-5p	MIMAT0000083	INPP5A	Microarray	19088304
hsa-mir-26b-5p	MIMAT0000083	INPP5B	Microarray	19088304
hsa-mir-26b-5p	MIMAT0000083	INPP5D	Microarray	19088304
hsa-mir-26b-5p	MIMAT0000083	INPP5J	Microarray	19088304
hsa-mir-26b-5p	MIMAT0000083	INPP5K	Microarray	19088304
hsa-mir-26b-5p	MIMAT0000083	INSL4	Microarray	19088304
hsa-mir-26b-5p	MIMAT0000083	INSR	Microarray	19088304
hsa-mir-6069	MIMAT0023694	INTS3	PAR-CLIP	26701625
hsa-let-7e-5p	MIMAT0000066	INTS7	HITS-CLIP	23706177
hsa-mir-26b-5p	MIMAT0000083	INTS7	Microarray	19088304
hsa-mir-4722-3p	MIMAT0019837	INTS7	HITS-CLIP	23824327
hsa-mir-26b-5p	MIMAT0000083	IPO13	CLASH	23622248
hsa-let-7e-5p	MIMAT0000066	IPO9	HITS-CLIP	23313552
hsa-mir-4722-3p	MIMAT0019837	IPP	HITS-CLIP//PAR-CLIP	23824327|27292025
hsa-mir-92a-1-5p	MIMAT0004507	IQGAP2	qRT-PCR	26865277
hsa-mir-92a-1-5p	MIMAT0004507	IQSEC1	CLASH	23622248
hsa-mir-6069	MIMAT0023694	IREB2	PAR-CLIP	21572407
hsa-mir-26b-5p	MIMAT0000083	IRF4	HITS-CLIP	22473208
hsa-mir-26b-5p	MIMAT0000083	IRGC	Microarray	19088304
hsa-let-7e-5p	MIMAT0000066	IRGQ	CLASH	23622248
hsa-let-7e-5p	MIMAT0000066	IRS2	CLASH	23622248
hsa-let-7e-5p	MIMAT0000066	IRS4	CLASH	23622248
hsa-mir-4722-3p	MIMAT0019837	ISG20L2	HITS-CLIP	23313552
hsa-mir-26b-5p	MIMAT0000083	ISOC2	Microarray	19088304
hsa-mir-26b-5p	MIMAT0000083	ITFG1	Microarray	19088304
hsa-mir-130b-5p	MIMAT0004680	ITGA1	HITS-CLIP	23824327
hsa-mir-26b-5p	MIMAT0000083	ITGA2	PAR-CLIP	27292025
hsa-mir-4722-3p	MIMAT0019837	ITGA2	PAR-CLIP	27292025
hsa-let-7e-5p	MIMAT0000066	ITGA3	HITS-CLIP	23706177|23313552
hsa-mir-26b-5p	MIMAT0000083	ITGA3	Microarray	19088304
hsa-mir-26b-5p	MIMAT0000083	ITGAX	Microarray	19088304
hsa-mir-26b-5p	MIMAT0000083	ITGB2	Microarray	19088304
hsa-mir-26b-5p	MIMAT0000083	ITM2A	Microarray	19088304
hsa-mir-1244	MIMAT0005896	ITM2A	HITS-CLIP	23824327
hsa-mir-4722-3p	MIMAT0019837	ITPR2	HITS-CLIP	19536157
hsa-let-7e-5p	MIMAT0000066	IVD	CLASH	23622248
hsa-mir-26b-5p	MIMAT0000083	IVNS1ABP	Microarray	19088304
hsa-mir-92a-1-5p	MIMAT0004507	JADE2	PAR-CLIP	26701625
hsa-mir-26b-5p	MIMAT0000083	JAG1	Luciferase reporter assay	28203521
hsa-mir-130b-5p	MIMAT0004680	JAG2	HITS-CLIP	23824327
hsa-mir-26b-5p	MIMAT0000083	JAM2	Microarray	19088304
hsa-mir-26b-5p	MIMAT0000083	JARID2	Sequencing	20371350
hsa-let-7e-5p	MIMAT0000066	JAZF1	CLASH	23622248
hsa-mir-26b-5p	MIMAT0000083	JCAD	Microarray	19088304
hsa-let-7e-5p	MIMAT0000066	JMJD1C	CLASH	23622248
hsa-mir-130b-5p	MIMAT0004680	JMY	CLASH	23622248
hsa-mir-26b-5p	MIMAT0000083	JOSD1	Microarray	19088304
hsa-mir-7641	MIMAT0029782	JPH2	HITS-CLIP	23824327
hsa-mir-1244	MIMAT0005896	JRKL	PAR-CLIP	22291592
hsa-mir-26b-5p	MIMAT0000083	JUN	Microarray	19088304
hsa-mir-26b-5p	MIMAT0000083	KANK2	Microarray	19088304
hsa-mir-130b-5p	MIMAT0004680	KANSL1	HITS-CLIP	23824327
hsa-mir-26b-5p	MIMAT0000083	KANSL3	Microarray	19088304
hsa-mir-4722-3p	MIMAT0019837	KARS	HITS-CLIP	23824327
hsa-mir-26b-5p	MIMAT0000083	KAT2B	Microarray	19088304
hsa-let-7e-5p	MIMAT0000066	KATNAL1	CLASH	23622248
hsa-let-7e-5p	MIMAT0000066	KATNB1	CLASH	23622248
hsa-mir-4722-3p	MIMAT0019837	KBTBD11	HITS-CLIP	19536157
hsa-mir-5008-3p	MIMAT0021040	KBTBD11	HITS-CLIP	19536157
hsa-mir-26b-5p	MIMAT0000083	KCNA5	Microarray	19088304
hsa-mir-6069	MIMAT0023694	KCNC3	PAR-CLIP	22291592
hsa-mir-26b-5p	MIMAT0000083	KCND1	Microarray	19088304
hsa-mir-26b-5p	MIMAT0000083	KCNF1	Microarray	19088304
hsa-mir-26b-5p	MIMAT0000083	KCNH4	Microarray	19088304
hsa-mir-4722-3p	MIMAT0019837	KCNH6	HITS-CLIP	23824327
hsa-mir-4722-3p	MIMAT0019837	KCNJ12	PAR-CLIP	22012620
hsa-mir-130b-5p	MIMAT0004680	KCNJ6	HITS-CLIP	23824327
hsa-mir-130b-5p	MIMAT0004680	KCNK6	HITS-CLIP	23824327
hsa-mir-4722-3p	MIMAT0019837	KCNMB1	HITS-CLIP	23824327
hsa-mir-26b-5p	MIMAT0000083	KCNN2	Microarray	19088304
hsa-mir-26b-5p	MIMAT0000083	KCNQ2	Microarray	19088304
hsa-mir-4722-3p	MIMAT0019837	KCNQ3	HITS-CLIP	23824327
hsa-mir-26b-5p	MIMAT0000083	KCTD14	Microarray	19088304
hsa-mir-4722-3p	MIMAT0019837	KCTD20	PAR-CLIP	23592263|26701625
hsa-let-7e-5p	MIMAT0000066	KCTD21	PAR-CLIP	23592263
hsa-mir-26b-5p	MIMAT0000083	KCTD9	Microarray	19088304
hsa-mir-26b-5p	MIMAT0000083	KDELC1	Microarray	19088304
hsa-mir-26b-5p	MIMAT0000083	KDELR1	HITS-CLIP	23824327
hsa-mir-4722-3p	MIMAT0019837	KDELR1	HITS-CLIP	23824327
hsa-mir-26b-5p	MIMAT0000083	KDM4A	Microarray	19088304
hsa-mir-130b-5p	MIMAT0004680	KDM5A	HITS-CLIP	23824327
hsa-mir-26b-5p	MIMAT0000083	KDM5D	Microarray	19088304
hsa-mir-26b-5p	MIMAT0000083	KDM7A	Microarray	19088304
hsa-mir-4722-3p	MIMAT0019837	KDSR	HITS-CLIP//PAR-CLIP	23824327|27292025
hsa-mir-26b-5p	MIMAT0000083	KEAP1	Microarray	19088304
hsa-mir-26b-5p	MIMAT0000083	KHDC1	Microarray	19088304
hsa-mir-26b-5p	MIMAT0000083	KHK	Microarray	19088304
hsa-let-7e-5p	MIMAT0000066	KIAA0100	CLASH	23622248
hsa-mir-26b-5p	MIMAT0000083	KIAA0232	Microarray	19088304
hsa-let-7e-5p	MIMAT0000066	KIAA0355	CLASH	23622248
hsa-mir-26b-5p	MIMAT0000083	KIAA0368	Microarray	19088304
hsa-let-7e-5p	MIMAT0000066	KIAA0391	PAR-CLIP	21572407
hsa-mir-26b-5p	MIMAT0000083	KIAA0408	HITS-CLIP//PAR-CLIP	21572407|23824327|23313552|27418678
hsa-mir-4722-3p	MIMAT0019837	KIAA0408	HITS-CLIP//PAR-CLIP	23824327|27292025
hsa-let-7e-5p	MIMAT0000066	KIAA0930	PAR-CLIP	23592263
hsa-mir-26b-5p	MIMAT0000083	KIAA1024	Microarray	19088304
hsa-mir-26b-5p	MIMAT0000083	KIAA1107	Microarray	19088304
hsa-let-7e-5p	MIMAT0000066	KIAA1143	PAR-CLIP	26701625
hsa-mir-26b-5p	MIMAT0000083	KIAA1324	Microarray	19088304
hsa-let-7e-5p	MIMAT0000066	KIAA1328	HITS-CLIP	23313552
hsa-mir-26b-5p	MIMAT0000083	KIAA1644	Microarray	19088304
hsa-mir-26b-5p	MIMAT0000083	KIF1B	Microarray	19088304
hsa-mir-26b-5p	MIMAT0000083	KIF1C	Microarray	19088304
hsa-mir-26b-5p	MIMAT0000083	KIF21B	Microarray	19088304
hsa-let-7e-5p	MIMAT0000066	KIF27	PAR-CLIP	22100165
hsa-mir-26b-5p	MIMAT0000083	KIF3A	PAR-CLIP	27292025
hsa-mir-4722-3p	MIMAT0019837	KIF3A	PAR-CLIP	27292025
hsa-mir-26b-5p	MIMAT0000083	KIF4A	Microarray	19088304
hsa-mir-26b-5p	MIMAT0000083	KIFC3	Microarray	19088304
hsa-mir-130b-5p	MIMAT0004680	KIN	HITS-CLIP	23824327
hsa-mir-26b-5p	MIMAT0000083	KIR3DX1	Microarray	19088304
hsa-mir-7641	MIMAT0029782	KLB	HITS-CLIP	23824327
hsa-mir-92a-1-5p	MIMAT0004507	KLF2	Luciferase reporter assay//Microarray//qRT-PCR//Western blot	26299712
hsa-mir-26b-5p	MIMAT0000083	KLHDC10	HITS-CLIP	22473208
hsa-let-7e-5p	MIMAT0000066	KLHDC8B	PAR-CLIP	23592263
hsa-mir-26b-5p	MIMAT0000083	KLHL15	HITS-CLIP//PAR-CLIP	23592263|23446348|22012620|21572407|20371350
hsa-mir-26b-5p	MIMAT0000083	KLHL21	Microarray	19088304
hsa-mir-26b-5p	MIMAT0000083	KLHL24	Microarray//Sequencing	19088304|20371350
hsa-mir-130b-5p	MIMAT0004680	KLHL28	HITS-CLIP	23824327
hsa-mir-4722-3p	MIMAT0019837	KLHL36	PAR-CLIP	27292025
hsa-mir-26b-5p	MIMAT0000083	KLHL42	HITS-CLIP	22473208
hsa-mir-26b-5p	MIMAT0000083	KLRC1	Microarray	19088304
hsa-mir-26b-5p	MIMAT0000083	KLRC2	Microarray	19088304
hsa-mir-26b-5p	MIMAT0000083	KLRC4	Microarray	19088304
hsa-mir-130b-5p	MIMAT0004680	KMT2A	HITS-CLIP	23824327
hsa-mir-26b-5p	MIMAT0000083	KMT2C	Sequencing	20371350
hsa-let-7e-5p	MIMAT0000066	KMT2D	PAR-CLIP	24398324|21572407
hsa-mir-92a-1-5p	MIMAT0004507	KMT2D	PAR-CLIP	26701625
hsa-mir-26b-5p	MIMAT0000083	KMT5A	PAR-CLIP	22012620|20371350|27292025
hsa-mir-4722-3p	MIMAT0019837	KNSTRN	PAR-CLIP	27292025
hsa-mir-26b-5p	MIMAT0000083	KPNA2	Immunohistochemistry//Luciferase reporter assay//PAR-CLIP//qRT-PCR//Western blot	23592263|24398324|22012620|21572407|20371350|26204489|27078844|27292025
hsa-mir-1244	MIMAT0005896	KPNA3	HITS-CLIP	23313552
hsa-let-7e-5p	MIMAT0000066	KPNA5	HITS-CLIP//PAR-CLIP	24398324|23446348|21572407|20371350
hsa-mir-26b-5p	MIMAT0000083	KPNA6	HITS-CLIP	22473208
hsa-mir-4722-3p	MIMAT0019837	KPNA6	HITS-CLIP	23824327
hsa-mir-7641	MIMAT0029782	KRBA2	HITS-CLIP	23824327
hsa-let-7e-5p	MIMAT0000066	KRBOX4	CLASH	23622248
hsa-let-7e-5p	MIMAT0000066	KREMEN1	PAR-CLIP	23592263|26701625
hsa-mir-4722-3p	MIMAT0019837	KREMEN1	HITS-CLIP	23824327
hsa-mir-26b-5p	MIMAT0000083	KREMEN2	Microarray	19088304
hsa-mir-26b-5p	MIMAT0000083	KRT18	Microarray	19088304
hsa-mir-26b-5p	MIMAT0000083	KRT222	Microarray	19088304
hsa-mir-26b-5p	MIMAT0000083	KRT32	Microarray	19088304
hsa-mir-130b-5p	MIMAT0004680	KRT32	HITS-CLIP	23824327
hsa-mir-26b-5p	MIMAT0000083	KRT4	Microarray	19088304
hsa-mir-26b-5p	MIMAT0000083	KRT8	Microarray	19088304
hsa-mir-92a-1-5p	MIMAT0004507	KRTAP4-2	PAR-CLIP	22012620
hsa-mir-26b-5p	MIMAT0000083	KRTAP5-3	Microarray	19088304
hsa-mir-26b-5p	MIMAT0000083	KRTAP5-7	Microarray	19088304
hsa-mir-26b-5p	MIMAT0000083	L1CAM	Microarray	19088304
hsa-mir-4722-3p	MIMAT0019837	LACTB	HITS-CLIP	23824327
hsa-mir-26b-5p	MIMAT0000083	LACTB2	Microarray	19088304
hsa-mir-26b-5p	MIMAT0000083	LAMA3	Microarray	19088304
hsa-mir-26b-5p	MIMAT0000083	LAMP3	Microarray	19088304
hsa-mir-26b-5p	MIMAT0000083	LARP1	Immunohistochemistry//Luciferase reporter assay//qRT-PCR//Western blot	26063484
hsa-mir-4722-3p	MIMAT0019837	LATS1	HITS-CLIP	23824327
hsa-mir-4722-3p	MIMAT0019837	LAX1	HITS-CLIP	23824327
hsa-mir-26b-5p	MIMAT0000083	LBH	Microarray	19088304
hsa-mir-26b-5p	MIMAT0000083	LCAT	Microarray	19088304
hsa-mir-4722-3p	MIMAT0019837	LCTL	HITS-CLIP	23824327
hsa-mir-26b-5p	MIMAT0000083	LDB2	Microarray	19088304
hsa-mir-6069	MIMAT0023694	LDHD	PAR-CLIP	22012620
hsa-mir-4722-3p	MIMAT0019837	LDLRAD4	HITS-CLIP	19536157
hsa-mir-4722-3p	MIMAT0019837	LEAP2	HITS-CLIP	23824327
hsa-let-7e-5p	MIMAT0000066	LEFTY1	PAR-CLIP	22012620
hsa-mir-26b-5p	MIMAT0000083	LETM1	Microarray	19088304
hsa-mir-4722-3p	MIMAT0019837	LETM2	HITS-CLIP	23824327
hsa-mir-26b-5p	MIMAT0000083	LGALSL	Microarray	19088304
hsa-mir-26b-5p	MIMAT0000083	LGMN	Microarray	19088304
hsa-mir-4722-3p	MIMAT0019837	LGSN	HITS-CLIP	23313552
hsa-let-7e-5p	MIMAT0000066	LHFPL2	CLASH	23622248
hsa-mir-130b-5p	MIMAT0004680	LHX5	HITS-CLIP	19536157
hsa-mir-26b-5p	MIMAT0000083	LHX6	Microarray	19088304
hsa-mir-130b-5p	MIMAT0004680	LHX9	HITS-CLIP	23824327
hsa-mir-26b-5p	MIMAT0000083	LIAS	Microarray	19088304
hsa-mir-26b-5p	MIMAT0000083	LIF	Microarray	19088304
hsa-mir-26b-5p	MIMAT0000083	LIG1	Microarray	19088304
hsa-mir-26b-5p	MIMAT0000083	LIG4	Microarray	19088304
hsa-mir-26b-5p	MIMAT0000083	LILRA4	Microarray	19088304
hsa-let-7e-5p	MIMAT0000066	LIMD2	PAR-CLIP	23592263
hsa-let-7e-5p	MIMAT0000066	LIN28A	Luciferase reporter assay//Microarray//qRT-PCR//Western blot	23774216
hsa-mir-26b-5p	MIMAT0000083	LIN28A	Microarray	19088304
hsa-mir-1244	MIMAT0005896	LIN54	PAR-CLIP	23592263|24398324
hsa-mir-26b-5p	MIMAT0000083	LINC00483	Microarray	19088304
hsa-mir-130b-5p	MIMAT0004680	LINC00598	HITS-CLIP	23824327
hsa-mir-4722-3p	MIMAT0019837	LINC01560	PAR-CLIP	27292025
hsa-mir-26b-5p	MIMAT0000083	LMAN2L	Microarray	19088304
hsa-mir-4722-3p	MIMAT0019837	LMAN2L	PAR-CLIP	27292025
hsa-mir-26b-5p	MIMAT0000083	LMCD1	Microarray	19088304
hsa-let-7e-5p	MIMAT0000066	LMLN	CLASH	23622248
hsa-let-7e-5p	MIMAT0000066	LMNA	CLASH	23622248
hsa-mir-26b-5p	MIMAT0000083	LMNB1	Microarray	19088304
hsa-mir-5008-3p	MIMAT0021040	LMNB1	PAR-CLIP	20371350
hsa-mir-26b-5p	MIMAT0000083	LONP1	Microarray	19088304
hsa-mir-26b-5p	MIMAT0000083	LOXL2	PAR-CLIP	23592263
hsa-mir-26b-5p	MIMAT0000083	LPCAT1	Microarray	19088304
hsa-mir-6069	MIMAT0023694	LPCAT3	PAR-CLIP	20371350
hsa-mir-130b-5p	MIMAT0004680	LPP	HITS-CLIP	23824327
hsa-mir-26b-5p	MIMAT0000083	LRFN3	Microarray	19088304
hsa-mir-4722-3p	MIMAT0019837	LRG1	HITS-CLIP	23824327
hsa-mir-4722-3p	MIMAT0019837	LRIF1	HITS-CLIP	23824327
hsa-mir-5008-3p	MIMAT0021040	LRIF1	HITS-CLIP	23824327
hsa-let-7e-5p	MIMAT0000066	LRIG3	PAR-CLIP	21572407|20371350
hsa-mir-4722-3p	MIMAT0019837	LRP10	HITS-CLIP	23824327
hsa-mir-26b-5p	MIMAT0000083	LRP1B	Microarray	19088304
hsa-mir-26b-5p	MIMAT0000083	LRP4	Microarray	19088304
hsa-mir-130b-5p	MIMAT0004680	LRP6	HITS-CLIP	19536157
hsa-mir-26b-5p	MIMAT0000083	LRPAP1	Microarray	19088304
hsa-mir-26b-5p	MIMAT0000083	LRRC17	Microarray	19088304
hsa-mir-26b-5p	MIMAT0000083	LRRC2	Microarray	19088304
hsa-let-7e-5p	MIMAT0000066	LRRC20	PAR-CLIP	23592263
hsa-mir-26b-5p	MIMAT0000083	LRRC20	Microarray	19088304
hsa-mir-26b-5p	MIMAT0000083	LRRC27	HITS-CLIP	23824327
hsa-mir-4722-3p	MIMAT0019837	LRRC3C	HITS-CLIP	23313552
hsa-mir-7641	MIMAT0029782	LRRC3C	HITS-CLIP	23824327
hsa-mir-26b-5p	MIMAT0000083	LRRC40	Microarray	19088304
hsa-let-7e-5p	MIMAT0000066	LRRC41	CLASH	23622248
hsa-mir-4722-3p	MIMAT0019837	LRRC58	HITS-CLIP	23824327
hsa-let-7e-5p	MIMAT0000066	LRRC8A	CLASH	23622248
hsa-mir-26b-5p	MIMAT0000083	LRRC8D	Microarray	19088304
hsa-mir-26b-5p	MIMAT0000083	LRRC8E	Microarray	19088304
hsa-mir-130b-5p	MIMAT0004680	LRRFIP1	HITS-CLIP	23824327
hsa-mir-26b-5p	MIMAT0000083	LRRTM4	PAR-CLIP	22012620|27292025
hsa-mir-26b-5p	MIMAT0000083	LSAMP	Microarray	19088304
hsa-mir-4722-3p	MIMAT0019837	LSAMP	HITS-CLIP	23824327
hsa-mir-26b-5p	MIMAT0000083	LSM1	Microarray	19088304
hsa-mir-26b-5p	MIMAT0000083	LSM3	Microarray	19088304
hsa-let-7e-5p	MIMAT0000066	LSR	CLASH	23622248
hsa-mir-26b-5p	MIMAT0000083	LTA4H	Microarray	19088304
hsa-mir-26b-5p	MIMAT0000083	LUC7L	Microarray	19088304
hsa-mir-26b-5p	MIMAT0000083	LUC7L2	HITS-CLIP	23824327
hsa-let-7e-5p	MIMAT0000066	LUZP1	CLASH	23622248
hsa-mir-26b-5p	MIMAT0000083	LY6D	Microarray	19088304
hsa-let-7e-5p	MIMAT0000066	LYN	PAR-CLIP	23592263
hsa-mir-26b-5p	MIMAT0000083	LYZ	Microarray	19088304
hsa-mir-92a-1-5p	MIMAT0004507	LZIC	PAR-CLIP	20371350
hsa-mir-1244	MIMAT0005896	LZIC	PAR-CLIP	20371350
hsa-mir-130b-5p	MIMAT0004680	MACC1	CLASH	23622248
hsa-mir-4722-3p	MIMAT0019837	MACC1	HITS-CLIP	23824327
hsa-let-7e-5p	MIMAT0000066	MACF1	CLASH	23622248
hsa-mir-26b-5p	MIMAT0000083	MAD2L1	PAR-CLIP	22012620
hsa-mir-26b-5p	MIMAT0000083	MADD	Microarray	19088304
hsa-mir-26b-5p	MIMAT0000083	MAFG	Microarray	19088304
hsa-mir-26b-5p	MIMAT0000083	MAGEA11	Microarray	19088304
hsa-let-7e-5p	MIMAT0000066	MAGEA12	PAR-CLIP	27292025
hsa-let-7e-5p	MIMAT0000066	MAGEA3	PAR-CLIP	27292025
hsa-let-7e-5p	MIMAT0000066	MAGEA6	PAR-CLIP	27292025
hsa-mir-26b-5p	MIMAT0000083	MAGEA9	Microarray	19088304
hsa-mir-26b-5p	MIMAT0000083	MAGEA9B	Microarray	19088304
hsa-mir-26b-5p	MIMAT0000083	MAGEC3	Microarray	19088304
hsa-mir-26b-5p	MIMAT0000083	MAGIX	Microarray	19088304
hsa-mir-26b-5p	MIMAT0000083	MAGT1	Microarray	19088304
hsa-mir-130b-5p	MIMAT0004680	MAGT1	HITS-CLIP	23824327
hsa-mir-130b-5p	MIMAT0004680	MAML1	HITS-CLIP	19536157
hsa-mir-26b-5p	MIMAT0000083	MAN2A1	HITS-CLIP//PAR-CLIP	22473208|21572407
hsa-mir-4722-3p	MIMAT0019837	MAN2A2	PAR-CLIP	20371350
hsa-mir-26b-5p	MIMAT0000083	MANF	CLASH	23622248
hsa-mir-26b-5p	MIMAT0000083	MANSC1	Microarray	19088304
hsa-mir-26b-5p	MIMAT0000083	MAP1B	PAR-CLIP	22012620
hsa-mir-26b-5p	MIMAT0000083	MAP1LC3C	Microarray	19088304
hsa-mir-26b-5p	MIMAT0000083	MAP2K4	Microarray	19088304
hsa-let-7e-5p	MIMAT0000066	MAP2K7	PAR-CLIP	23592263|26701625
hsa-mir-26b-5p	MIMAT0000083	MAP3K12	Microarray	19088304
hsa-mir-551a	MIMAT0003214	MAP3K21	PAR-CLIP	23446348
hsa-mir-130b-5p	MIMAT0004680	MAP3K5	PAR-CLIP	21572407|27292025
hsa-mir-26b-5p	MIMAT0000083	MAP4K3	Microarray	19088304
hsa-mir-1244	MIMAT0005896	MAPK1	HITS-CLIP//PAR-CLIP	23592263|23446348|21572407
hsa-mir-7641	MIMAT0029782	MAPK1	HITS-CLIP	19536157
hsa-let-7e-5p	MIMAT0000066	MAPK6	PAR-CLIP	21572407
hsa-mir-26b-5p	MIMAT0000083	MAPK6	PAR-CLIP	22100165
hsa-mir-26b-5p	MIMAT0000083	MAPKAP1	Microarray	19088304
hsa-let-7e-5p	MIMAT0000066	MARCKSL1	PAR-CLIP	26701625
hsa-mir-92a-1-5p	MIMAT0004507	MARK2	PAR-CLIP	23592263
hsa-let-7e-5p	MIMAT0000066	MARS2	PAR-CLIP	26701625
hsa-mir-1244	MIMAT0005896	MARVELD2	PAR-CLIP	23446348
hsa-mir-4722-3p	MIMAT0019837	MARVELD3	PAR-CLIP	27292025
hsa-mir-26b-5p	MIMAT0000083	MAST4	Microarray	19088304
hsa-mir-26b-5p	MIMAT0000083	MAT2A	HITS-CLIP//PAR-CLIP//Sequencing	20371350|22473208|24398324|23446348|22012620|21572407
hsa-mir-26b-5p	MIMAT0000083	MAT2B	Microarray	19088304
hsa-mir-26b-5p	MIMAT0000083	MATN3	Microarray	19088304
hsa-let-7e-5p	MIMAT0000066	MATR3	CLASH	23622248
hsa-mir-26b-5p	MIMAT0000083	MATR3	Microarray	19088304
hsa-mir-92a-1-5p	MIMAT0004507	MAZ	PAR-CLIP	23592263
hsa-mir-26b-5p	MIMAT0000083	MB	Microarray	19088304
hsa-let-7e-5p	MIMAT0000066	MBD2	PAR-CLIP	24398324|23446348|21572407|20371350
hsa-mir-26b-5p	MIMAT0000083	MBIP	Microarray	19088304
hsa-mir-92a-1-5p	MIMAT0004507	MBLAC2	CLASH	23622248
hsa-mir-4722-3p	MIMAT0019837	MBOAT2	HITS-CLIP	19536157
hsa-mir-130b-5p	MIMAT0004680	MC2R	HITS-CLIP	23824327
hsa-mir-4722-3p	MIMAT0019837	MC2R	PAR-CLIP	22291592
hsa-mir-26b-5p	MIMAT0000083	MCC	Microarray	19088304
hsa-mir-1244	MIMAT0005896	MCCC2	PAR-CLIP	27292025
hsa-let-7e-5p	MIMAT0000066	MCF2L2	HITS-CLIP//PAR-CLIP	21572407|20371350|23706177
hsa-mir-26b-5p	MIMAT0000083	MCL1	Sequencing	20371350
hsa-mir-26b-5p	MIMAT0000083	MCM3	Microarray	19088304
hsa-mir-26b-5p	MIMAT0000083	MCM8	HITS-CLIP	23824327
hsa-mir-4722-3p	MIMAT0019837	MCM8	HITS-CLIP	23824327
hsa-mir-26b-5p	MIMAT0000083	MCMBP	Microarray	19088304
hsa-mir-26b-5p	MIMAT0000083	MCTP2	Microarray	19088304
hsa-mir-4722-3p	MIMAT0019837	MCTS1	HITS-CLIP	24906430
hsa-mir-26b-5p	MIMAT0000083	MCUB	Microarray	19088304
hsa-mir-26b-5p	MIMAT0000083	MCUR1	Microarray	19088304
hsa-mir-26b-5p	MIMAT0000083	MDH1	Microarray	19088304
hsa-mir-26b-5p	MIMAT0000083	MDM1	Microarray	19088304
hsa-mir-26b-5p	MIMAT0000083	MDM2	HITS-CLIP//PAR-CLIP//Sequencing	20371350|23592263|24398324|23446348|21572407
hsa-let-7e-5p	MIMAT0000066	MDM4	PAR-CLIP	23592263|24398324
hsa-mir-26b-5p	MIMAT0000083	MEAF6	Microarray	19088304
hsa-let-7e-5p	MIMAT0000066	MED13L	CLASH	23622248
hsa-mir-26b-5p	MIMAT0000083	MED22	Microarray	19088304
hsa-mir-26b-5p	MIMAT0000083	MED23	Microarray	19088304
hsa-mir-4722-3p	MIMAT0019837	MED28	HITS-CLIP	23824327
hsa-mir-4722-3p	MIMAT0019837	MED29	PAR-CLIP	27292025
hsa-mir-26b-5p	MIMAT0000083	MED31	Microarray	19088304
hsa-mir-26b-5p	MIMAT0000083	MED9	Microarray	19088304
hsa-mir-26b-5p	MIMAT0000083	MEF2C	Microarray	19088304
hsa-let-7e-5p	MIMAT0000066	MEF2D	PAR-CLIP	26701625
hsa-mir-26b-5p	MIMAT0000083	MEF2D	Microarray	19088304
hsa-mir-4722-3p	MIMAT0019837	MEF2D	HITS-CLIP	19536157
hsa-mir-26b-5p	MIMAT0000083	MEGF8	Microarray	19088304
hsa-mir-130b-5p	MIMAT0004680	MEIS3	CLASH	23622248
hsa-let-7e-5p	MIMAT0000066	MEIS3P1	PAR-CLIP	23592263
hsa-mir-26b-5p	MIMAT0000083	MEP1A	Microarray	19088304
hsa-mir-26b-5p	MIMAT0000083	MESD	Sequencing	20371350
hsa-mir-26b-5p	MIMAT0000083	METAP2	HITS-CLIP	22473208
hsa-mir-26b-5p	MIMAT0000083	METRN	Microarray	19088304
hsa-mir-130b-5p	MIMAT0004680	METTL15	HITS-CLIP	19536157
hsa-mir-26b-5p	MIMAT0000083	METTL16	Microarray	19088304
hsa-mir-26b-5p	MIMAT0000083	METTL2B	PAR-CLIP	27292025
hsa-mir-4722-3p	MIMAT0019837	METTL2B	PAR-CLIP	27292025
hsa-mir-26b-5p	MIMAT0000083	METTL9	Microarray	19088304
hsa-mir-4722-3p	MIMAT0019837	MFAP3	PAR-CLIP	22291592
hsa-mir-26b-5p	MIMAT0000083	MFHAS1	HITS-CLIP//Microarray	19088304|27418678
hsa-mir-26b-5p	MIMAT0000083	MFSD12	Microarray	19088304
hsa-mir-130b-5p	MIMAT0004680	MFSD6	CLASH	23622248
hsa-mir-4722-3p	MIMAT0019837	MFSD6	HITS-CLIP	19536157
hsa-let-7e-5p	MIMAT0000066	MFSD8	PAR-CLIP	24398324
hsa-mir-7641	MIMAT0029782	MFSD8	PAR-CLIP	22100165
hsa-mir-26b-5p	MIMAT0000083	MFSD9	Microarray	19088304
hsa-mir-26b-5p	MIMAT0000083	MGP	Microarray	19088304
hsa-mir-26b-5p	MIMAT0000083	MGST3	Microarray	19088304
hsa-mir-26b-5p	MIMAT0000083	MIA3	Microarray	19088304
hsa-mir-26b-5p	MIMAT0000083	MICA	HITS-CLIP	23824327
hsa-mir-26b-5p	MIMAT0000083	MICU2	Microarray	19088304
hsa-mir-130b-5p	MIMAT0004680	MID1	CLASH	23622248
hsa-let-7e-5p	MIMAT0000066	MIDN	PAR-CLIP	26701625
hsa-let-7e-5p	MIMAT0000066	MIEF1	PAR-CLIP	23592263|24398324|21572407|20371350
hsa-mir-26b-5p	MIMAT0000083	MIEN1	Luciferase reporter assay	26827826
hsa-mir-4722-3p	MIMAT0019837	MIGA1	HITS-CLIP	23824327
hsa-mir-26b-5p	MIMAT0000083	MINDY1	PAR-CLIP	27292025
hsa-mir-4722-3p	MIMAT0019837	MINDY1	PAR-CLIP	27292025
hsa-mir-4722-3p	MIMAT0019837	MIPOL1	HITS-CLIP	23824327
hsa-mir-26b-5p	MIMAT0000083	MIR22HG	Microarray	19088304
hsa-let-7e-5p	MIMAT0000066	MKI67	CLASH	23622248
hsa-mir-4722-3p	MIMAT0019837	MKI67	PAR-CLIP	20371350
hsa-mir-26b-5p	MIMAT0000083	MKNK1	Microarray	19088304
hsa-let-7e-5p	MIMAT0000066	MLLT10	PAR-CLIP	23592263|27292025
hsa-mir-26b-5p	MIMAT0000083	MLNR	Microarray	19088304
hsa-mir-26b-5p	MIMAT0000083	MLXIP	Microarray	19088304
hsa-mir-130b-5p	MIMAT0004680	MLXIPL	HITS-CLIP	23824327
hsa-mir-26b-5p	MIMAT0000083	MMD	Microarray	19088304
hsa-mir-26b-5p	MIMAT0000083	MME	Microarray	19088304
hsa-mir-26b-5p	MIMAT0000083	MMP10	Microarray	19088304
hsa-mir-26b-5p	MIMAT0000083	MMP8	Microarray	19088304
hsa-let-7e-5p	MIMAT0000066	MMP9	Luciferase reporter assay//qRT-PCR//Western blot	24503540
hsa-mir-26b-5p	MIMAT0000083	MNAT1	Microarray	19088304
hsa-mir-26b-5p	MIMAT0000083	MNDA	Microarray	19088304
hsa-mir-5008-3p	MIMAT0021040	MOB3C	HITS-CLIP	23824327
hsa-mir-4722-3p	MIMAT0019837	MOB4	HITS-CLIP	23824327
hsa-mir-7641	MIMAT0029782	MOGAT3	PAR-CLIP	27292025
hsa-mir-26b-5p	MIMAT0000083	MORC4	Microarray	19088304
hsa-mir-26b-5p	MIMAT0000083	MPC1	Microarray	19088304
hsa-mir-26b-5p	MIMAT0000083	MPC2	Microarray	19088304
hsa-mir-26b-5p	MIMAT0000083	MPDU1	Microarray	19088304
hsa-mir-26b-5p	MIMAT0000083	MPDZ	Microarray	19088304
hsa-mir-26b-5p	MIMAT0000083	MPHOSPH8	Microarray	19088304
hsa-mir-26b-5p	MIMAT0000083	MPI	Microarray	19088304
hsa-let-7e-5p	MIMAT0000066	MPL	Luciferase reporter assay	20445018
hsa-mir-4722-3p	MIMAT0019837	MPLKIP	HITS-CLIP	23824327
hsa-mir-4722-3p	MIMAT0019837	MPP5	PAR-CLIP	23592263
hsa-mir-4722-3p	MIMAT0019837	MPPE1	HITS-CLIP	23824327
hsa-mir-26b-5p	MIMAT0000083	MPV17	Microarray	19088304
hsa-mir-6069	MIMAT0023694	MRAS	PAR-CLIP	23592263
hsa-mir-130b-5p	MIMAT0004680	MRE11	HITS-CLIP	19536157
hsa-mir-4722-3p	MIMAT0019837	MRE11	HITS-CLIP	23824327
hsa-mir-26b-5p	MIMAT0000083	MREG	Microarray	19088304
hsa-mir-26b-5p	MIMAT0000083	MRM1	Microarray	19088304
hsa-mir-4722-3p	MIMAT0019837	MRM3	HITS-CLIP	23824327
hsa-mir-4722-3p	MIMAT0019837	MRNIP	PAR-CLIP	27292025
hsa-let-7e-5p	MIMAT0000066	MRPL12	PAR-CLIP	23592263
hsa-mir-4722-3p	MIMAT0019837	MRPL17	HITS-CLIP	23824327
hsa-mir-26b-5p	MIMAT0000083	MRPL18	Microarray	19088304
hsa-mir-4722-3p	MIMAT0019837	MRPL19	PAR-CLIP	20371350
hsa-mir-26b-5p	MIMAT0000083	MRPL22	Microarray	19088304
hsa-mir-26b-5p	MIMAT0000083	MRPL58	Microarray	19088304
hsa-mir-92a-1-5p	MIMAT0004507	MRPS11	CLASH	23622248
hsa-mir-26b-5p	MIMAT0000083	MRPS15	Microarray	19088304
hsa-mir-26b-5p	MIMAT0000083	MRPS16	Microarray	19088304
hsa-mir-26b-5p	MIMAT0000083	MRPS18B	Microarray	19088304
hsa-let-7e-5p	MIMAT0000066	MRPS2	CLASH	23622248
hsa-mir-26b-5p	MIMAT0000083	MRPS2	Microarray	19088304
hsa-mir-26b-5p	MIMAT0000083	MRPS28	Microarray	19088304
hsa-mir-26b-5p	MIMAT0000083	MRPS34	Microarray	19088304
hsa-let-7e-5p	MIMAT0000066	MS4A10	CLASH	23622248
hsa-let-7e-5p	MIMAT0000066	MSI2	PAR-CLIP	21572407
hsa-let-7e-5p	MIMAT0000066	MSMO1	CLASH	23622248
hsa-mir-26b-5p	MIMAT0000083	MSMO1	Microarray	19088304
hsa-mir-4722-3p	MIMAT0019837	MSRB2	PAR-CLIP	27292025
hsa-mir-130b-5p	MIMAT0004680	MT1A	HITS-CLIP	19536157
hsa-mir-26b-5p	MIMAT0000083	MT1HL1	Microarray	19088304
hsa-mir-26b-5p	MIMAT0000083	MT1M	Microarray	19088304
hsa-mir-26b-5p	MIMAT0000083	MT1P3	Microarray	19088304
hsa-mir-26b-5p	MIMAT0000083	MTA3	HITS-CLIP	23824327
hsa-let-7e-5p	MIMAT0000066	MTCH2	CLASH	23622248
hsa-mir-26b-5p	MIMAT0000083	MTCH2	Microarray	19088304
hsa-mir-26b-5p	MIMAT0000083	MTCP1	Microarray	19088304
hsa-mir-26b-5p	MIMAT0000083	MTDH	PAR-CLIP	24398324
hsa-mir-26b-5p	MIMAT0000083	MTERF1	Microarray	19088304
hsa-mir-26b-5p	MIMAT0000083	MTERF4	Microarray	19088304
hsa-let-7e-5p	MIMAT0000066	MTFR1	CLASH	23622248
hsa-mir-92a-1-5p	MIMAT0004507	MTHFD1L	HITS-CLIP	19536157
hsa-mir-26b-5p	MIMAT0000083	MTHFS	Microarray	19088304
hsa-mir-7641	MIMAT0029782	MTMR10	HITS-CLIP	23824327
hsa-mir-26b-5p	MIMAT0000083	MTMR12	HITS-CLIP	23313552
hsa-let-7e-5p	MIMAT0000066	MTMR14	CLASH	23622248
hsa-mir-7641	MIMAT0029782	MTO1	HITS-CLIP	23824327
hsa-mir-130b-5p	MIMAT0004680	MTPN	CLASH	23622248
hsa-mir-4722-3p	MIMAT0019837	MTRF1L	HITS-CLIP	19536157
hsa-let-7e-5p	MIMAT0000066	MTUS1	PAR-CLIP	23592263|24398324|23446348|26701625
hsa-mir-26b-5p	MIMAT0000083	MTX1	Microarray	19088304
hsa-let-7e-5p	MIMAT0000066	MTX3	HITS-CLIP	23706177
hsa-mir-130b-5p	MIMAT0004680	MUC17	HITS-CLIP	19536157
hsa-mir-26b-5p	MIMAT0000083	MUC7	Microarray	19088304
hsa-mir-130b-5p	MIMAT0004680	MUT	HITS-CLIP	23824327
hsa-mir-26b-5p	MIMAT0000083	MVD	Microarray	19088304
hsa-let-7e-5p	MIMAT0000066	MXD1	PAR-CLIP	21572407
hsa-mir-26b-5p	MIMAT0000083	MXI1	Microarray	19088304
hsa-mir-26b-5p	MIMAT0000083	MYBBP1A	Microarray	19088304
hsa-mir-26b-5p	MIMAT0000083	MYBPC1	Microarray	19088304
hsa-mir-130b-5p	MIMAT0004680	MYBPC1	CLASH	23622248
hsa-let-7e-5p	MIMAT0000066	MYC	TRAP	24510096
hsa-mir-92a-1-5p	MIMAT0004507	MYC	qRT-PCR	24955218
hsa-let-7e-5p	MIMAT0000066	MYCN	Luciferase reporter assay//Microarray//qRT-PCR//Reporter assay//Western blot	21654684|23774216
hsa-mir-26b-5p	MIMAT0000083	MYEF2	Microarray	19088304
hsa-mir-5008-3p	MIMAT0021040	MYLIP	PAR-CLIP	21572407
hsa-mir-7641	MIMAT0029782	MYLK3	HITS-CLIP	23824327
hsa-let-7e-5p	MIMAT0000066	MYO9B	CLASH	23622248
hsa-mir-130b-5p	MIMAT0004680	MYOCD	HITS-CLIP	23824327
hsa-mir-26b-5p	MIMAT0000083	MYOG	Microarray	19088304
hsa-mir-130b-5p	MIMAT0004680	MYORG	HITS-CLIP//PAR-CLIP	21572407|19536157
hsa-mir-7641	MIMAT0029782	MYOZ2	HITS-CLIP	23824327
hsa-mir-26b-5p	MIMAT0000083	MYOZ3	HITS-CLIP	23824327
hsa-mir-4722-3p	MIMAT0019837	MYOZ3	HITS-CLIP	23824327
hsa-mir-26b-5p	MIMAT0000083	MYT1L	Microarray	19088304
hsa-mir-130b-5p	MIMAT0004680	N4BP2	HITS-CLIP	19536157
hsa-mir-26b-5p	MIMAT0000083	N6AMT1	Microarray	19088304
hsa-let-7e-5p	MIMAT0000066	NAA20	PAR-CLIP	23592263
hsa-let-7e-5p	MIMAT0000066	NAA30	PAR-CLIP	21572407
hsa-mir-26b-5p	MIMAT0000083	NAA40	Microarray	19088304
hsa-mir-26b-5p	MIMAT0000083	NAA50	Microarray	19088304
hsa-let-7e-5p	MIMAT0000066	NAA60	CLASH	23622248
hsa-mir-26b-5p	MIMAT0000083	NABP1	HITS-CLIP//Microarray//PAR-CLIP	19088304|22473208|23446348|20371350|21572407|26701625
hsa-mir-92a-1-5p	MIMAT0004507	NACC1	PAR-CLIP	26701625
hsa-mir-1244	MIMAT0005896	NACC1	PAR-CLIP	23592263|20371350
hsa-mir-26b-5p	MIMAT0000083	NACC2	Microarray	19088304
hsa-mir-26b-5p	MIMAT0000083	NAE1	Microarray	19088304
hsa-mir-26b-5p	MIMAT0000083	NAGK	Microarray	19088304
hsa-mir-4722-3p	MIMAT0019837	NAGK	HITS-CLIP	23824327
hsa-mir-26b-5p	MIMAT0000083	NAMPT	Luciferase reporter assay//qRT-PCR//Western blot	23922874
hsa-let-7e-5p	MIMAT0000066	NAP1L1	HITS-CLIP	19536157
hsa-mir-26b-5p	MIMAT0000083	NAP1L1	CLASH	23622248
hsa-mir-26b-5p	MIMAT0000083	NARS2	Microarray	19088304
hsa-mir-26b-5p	MIMAT0000083	NAT1	Microarray	19088304
hsa-let-7e-5p	MIMAT0000066	NAT8L	PAR-CLIP	21572407
hsa-mir-130b-5p	MIMAT0004680	NAV2	HITS-CLIP	23824327
hsa-mir-26b-5p	MIMAT0000083	NCAM2	Microarray	19088304
hsa-mir-26b-5p	MIMAT0000083	NCAPG2	Microarray	19088304
hsa-let-7e-5p	MIMAT0000066	NCBP1	CLASH	23622248
hsa-mir-26b-5p	MIMAT0000083	NCBP1	Microarray	19088304
hsa-let-7e-5p	MIMAT0000066	NCKAP5L	CLASH	23622248
hsa-let-7e-5p	MIMAT0000066	NCKIPSD	CLASH//HITS-CLIP//PAR-CLIP	23622248|23446348|23706177
hsa-let-7e-5p	MIMAT0000066	NCLN	CLASH	23622248
hsa-let-7e-5p	MIMAT0000066	NCOA3	PAR-CLIP	24398324|26701625
hsa-mir-4722-3p	MIMAT0019837	NCOA7	PAR-CLIP	27292025
hsa-mir-130b-5p	MIMAT0004680	NCOR2	CLASH	23622248
hsa-let-7e-5p	MIMAT0000066	ND1	CLASH	23622248
hsa-let-7e-5p	MIMAT0000066	ND2	CLASH	23622248
hsa-let-7e-5p	MIMAT0000066	ND3	CLASH	23622248
hsa-let-7e-5p	MIMAT0000066	ND4	CLASH	23622248
hsa-let-7e-5p	MIMAT0000066	ND5	CLASH	23622248
hsa-mir-130b-5p	MIMAT0004680	ND6	CLASH	23622248
hsa-let-7e-5p	MIMAT0000066	NDST1	CLASH	23622248
hsa-mir-26b-5p	MIMAT0000083	NDUFA1	Microarray	19088304
hsa-let-7e-5p	MIMAT0000066	NDUFA3	CLASH	23622248
hsa-let-7e-5p	MIMAT0000066	NDUFA4P1	PAR-CLIP	22100165
hsa-mir-26b-5p	MIMAT0000083	NDUFA5	Microarray	19088304
hsa-mir-26b-5p	MIMAT0000083	NDUFB1	Microarray	19088304
hsa-mir-26b-5p	MIMAT0000083	NDUFB11	Microarray	19088304
hsa-mir-26b-5p	MIMAT0000083	NDUFB4	Microarray	19088304
hsa-mir-26b-5p	MIMAT0000083	NDUFB5	Microarray	19088304
hsa-let-7e-5p	MIMAT0000066	NDUFS5	CLASH	23622248
hsa-mir-26b-5p	MIMAT0000083	NDUFS7	Microarray	19088304
hsa-mir-26b-5p	MIMAT0000083	NDUFS8	Microarray	19088304
hsa-mir-26b-5p	MIMAT0000083	NEK9	Microarray	19088304
hsa-mir-4722-3p	MIMAT0019837	NEK9	HITS-CLIP	23824327
hsa-mir-26b-5p	MIMAT0000083	NELFCD	Microarray	19088304
hsa-mir-26b-5p	MIMAT0000083	NELFE	Microarray	19088304
hsa-mir-26b-5p	MIMAT0000083	NET1	Microarray	19088304
hsa-let-7e-5p	MIMAT0000066	NF1	CLASH	23622248
hsa-mir-5008-3p	MIMAT0021040	NFAM1	HITS-CLIP	23824327
hsa-mir-4722-3p	MIMAT0019837	NFATC2IP	HITS-CLIP	23824327
hsa-mir-26b-5p	MIMAT0000083	NFE2L2	Microarray	19088304
hsa-mir-6069	MIMAT0023694	NFIC	PAR-CLIP	26701625
hsa-mir-26b-5p	MIMAT0000083	NFKB1	Microarray	19088304
hsa-mir-130b-5p	MIMAT0004680	NFKBID	HITS-CLIP	23824327|27418678
hsa-mir-26b-5p	MIMAT0000083	NFKBIE	Microarray	19088304
hsa-let-7e-5p	MIMAT0000066	NHLRC2	HITS-CLIP	23313552
hsa-let-7e-5p	MIMAT0000066	NHLRC3	PAR-CLIP	24398324|21572407|20371350
hsa-let-7e-5p	MIMAT0000066	NICN1	CLASH	23622248
hsa-mir-26b-5p	MIMAT0000083	NIP7	PAR-CLIP//Sequencing	20371350|26701625
hsa-mir-92a-1-5p	MIMAT0004507	NKAP	PAR-CLIP	23446348
hsa-mir-1244	MIMAT0005896	NKX2-1	HITS-CLIP	23824327
hsa-mir-26b-5p	MIMAT0000083	NKX2-2	Microarray	19088304
hsa-mir-26b-5p	MIMAT0000083	NKX2-5	Microarray	19088304
hsa-mir-26b-5p	MIMAT0000083	NKX3-2	Microarray	19088304
[truncated: 1,682 more rows]

## Sheet: IK1 upregulated miRNA targets
ID	Accession	Target	Experiment	Literature(PMID)
hsa-mir-4649-5p	MIMAT0019711	AAED1	HITS-CLIP	23706177
hsa-mir-3663-3p	MIMAT0018085	AAK1	HITS-CLIP	23824327
hsa-mir-8069	MIMAT0030996	AASDHPPT	PAR-CLIP	20371350
hsa-mir-4530	MIMAT0019069	AATF	PAR-CLIP	23708386
hsa-mir-6088	MIMAT0023713	ABAT	HITS-CLIP	19536157
hsa-mir-4516	MIMAT0019053	ABCC6	HITS-CLIP	23824327|23313552|28735896
hsa-mir-4739	MIMAT0019868	ABCC6	PAR-CLIP	23592263|20371350
hsa-mir-4530	MIMAT0019069	ABCG8	PAR-CLIP	27292025
hsa-mir-6800-5p	MIMAT0027500	ABHD12	PAR-CLIP	27292025
hsa-mir-8069	MIMAT0030996	ABI2	PAR-CLIP	20371350
hsa-mir-663a	MIMAT0003326	ABL1	PAR-CLIP	26701625
hsa-mir-4530	MIMAT0019069	ACOT9	HITS-CLIP	23313552
hsa-mir-6088	MIMAT0023713	ACOT9	HITS-CLIP	22927820
hsa-mir-4689	MIMAT0019778	ACSF2	PAR-CLIP	23592263
hsa-mir-4739	MIMAT0019868	ACTR2	PAR-CLIP	22012620|27292025
hsa-mir-4739	MIMAT0019868	ACVR1B	PAR-CLIP	23592263|20371350
hsa-mir-6800-5p	MIMAT0027500	ACVR2B	HITS-CLIP	27418678
hsa-mir-4488	MIMAT0019022	ACVRL1	PAR-CLIP	26701625
hsa-mir-1237-5p	MIMAT0022946	ACVRL1	PAR-CLIP	26701625
hsa-mir-4689	MIMAT0019778	ADAM12	HITS-CLIP	27418678
hsa-mir-6088	MIMAT0023713	ADAMTS4	HITS-CLIP//PAR-CLIP	23446348|23824327|27418678
hsa-mir-4739	MIMAT0019868	ADGRE5	PAR-CLIP	26701625
hsa-mir-4739	MIMAT0019868	ADGRF2	PAR-CLIP	26701625|27292025
hsa-mir-4739	MIMAT0019868	ADGRL1	PAR-CLIP	27292025
hsa-mir-6088	MIMAT0023713	ADH5	HITS-CLIP	23824327
hsa-mir-4674	MIMAT0019756	ADK	HITS-CLIP	23824327
hsa-mir-4739	MIMAT0019868	AEN	PAR-CLIP	23592263
hsa-mir-663a	MIMAT0003326	AFG1L	PAR-CLIP	20371350
hsa-mir-6088	MIMAT0023713	AGAP1	PAR-CLIP	26701625
hsa-mir-6789-5p	MIMAT0027478	AGAP1	PAR-CLIP	26701625
hsa-mir-4516	MIMAT0019053	AGAP9	PAR-CLIP	27292025
hsa-mir-4739	MIMAT0019868	AGO2	PAR-CLIP	23592263|26701625|27292025
hsa-mir-4739	MIMAT0019868	AGXT2	HITS-CLIP	23706177|23313552
hsa-mir-4516	MIMAT0019053	AHCYL2	PAR-CLIP	23592263
hsa-mir-4516	MIMAT0019053	AIG1	PAR-CLIP	27292025
hsa-mir-4739	MIMAT0019868	AIP	PAR-CLIP	23592263|20371350|26701625
hsa-mir-6088	MIMAT0023713	AIRE	HITS-CLIP	28735896
hsa-mir-4739	MIMAT0019868	AK2	PAR-CLIP	23592263
hsa-mir-4739	MIMAT0019868	AKAP11	PAR-CLIP	23592263
hsa-mir-3178	MIMAT0015055	AKIP1	HITS-CLIP	23824327
hsa-mir-4739	MIMAT0019868	AKR7A2	PAR-CLIP	23592263|27292025
hsa-mir-6088	MIMAT0023713	AKR7A2	HITS-CLIP	27418678
hsa-mir-7704	MIMAT0030019	AKR7A2	HITS-CLIP	27418678
hsa-mir-4689	MIMAT0019778	AKT1	Luciferase reporter assay//qRT-PCR	25756961
hsa-mir-663a	MIMAT0003326	AKT1S1	PAR-CLIP	26701625
hsa-mir-4689	MIMAT0019778	ALDH1A3	HITS-CLIP	19536157
hsa-mir-4649-5p	MIMAT0019711	ALDH1B1	HITS-CLIP	23313552
hsa-mir-4516	MIMAT0019053	ALDH9A1	PAR-CLIP	26701625
hsa-mir-4739	MIMAT0019868	ALDH9A1	PAR-CLIP	23592263
hsa-mir-4745-5p	MIMAT0019878	ALDOA	PAR-CLIP	26701625
hsa-mir-4649-5p	MIMAT0019711	ALG14	HITS-CLIP	23824327
hsa-mir-4689	MIMAT0019778	ALG14	HITS-CLIP	23313552
hsa-mir-4530	MIMAT0019069	ALG9	HITS-CLIP	23824327
hsa-mir-4649-5p	MIMAT0019711	ALG9	HITS-CLIP	23824327
hsa-mir-4516	MIMAT0019053	ALKBH5	PAR-CLIP	23592263|26701625
hsa-mir-4745-5p	MIMAT0019878	ALPI	HITS-CLIP	23313552
hsa-mir-3178	MIMAT0015055	AMH	PAR-CLIP	26701625
hsa-mir-3196	MIMAT0015080	AMH	PAR-CLIP	26701625
hsa-mir-4530	MIMAT0019069	ANAPC13	PAR-CLIP	21572407
hsa-mir-4745-5p	MIMAT0019878	ANG	PAR-CLIP	22291592
hsa-mir-4649-5p	MIMAT0019711	ANKFY1	HITS-CLIP	23824327
hsa-mir-4739	MIMAT0019868	ANKFY1	HITS-CLIP	23313552
hsa-mir-4488	MIMAT0019022	ANKLE1	HITS-CLIP	28735896
hsa-mir-1237-5p	MIMAT0022946	ANKLE1	HITS-CLIP	28735896
hsa-mir-3663-3p	MIMAT0018085	ANKRD13A	HITS-CLIP	23313552
hsa-mir-7704	MIMAT0030019	ANKRD33B	PAR-CLIP	23592263
hsa-mir-4739	MIMAT0019868	ANKRD45	PAR-CLIP	23592263|23446348
hsa-mir-663a	MIMAT0003326	ANKRD52	PAR-CLIP	20371350|26701625
hsa-mir-4516	MIMAT0019053	ANKRD52	PAR-CLIP	26701625
hsa-mir-4739	MIMAT0019868	ANKRD52	PAR-CLIP	26701625
hsa-mir-6789-5p	MIMAT0027478	ANKRD52	PAR-CLIP	23446348
hsa-mir-6088	MIMAT0023713	ANKRD9	HITS-CLIP	23824327
hsa-mir-150-3p	MIMAT0004610	ANKS1A	PAR-CLIP	21572407
hsa-mir-6088	MIMAT0023713	ANKS4B	HITS-CLIP	27418678
hsa-mir-4689	MIMAT0019778	ANKS6	HITS-CLIP	23824327
hsa-mir-6800-5p	MIMAT0027500	AOC3	PAR-CLIP	23592263
hsa-mir-4739	MIMAT0019868	AP2M1	PAR-CLIP	26701625
hsa-mir-4649-5p	MIMAT0019711	AP4E1	PAR-CLIP	23592263
hsa-mir-663a	MIMAT0003326	AP5Z1	PAR-CLIP	20371350
hsa-mir-4530	MIMAT0019069	AP5Z1	PAR-CLIP	22012620
hsa-mir-3663-3p	MIMAT0018085	APBB2	HITS-CLIP	24906430
hsa-mir-4689	MIMAT0019778	APBB2	PAR-CLIP	22100165
hsa-mir-663a	MIMAT0003326	APC	Alizarin red S staining//Immunoblot//Luciferase reporter assay//Microarray//qRT-PCR	24642258
hsa-mir-6789-5p	MIMAT0027478	APEX1	PAR-CLIP	23592263
hsa-mir-4739	MIMAT0019868	APH1A	PAR-CLIP	23592263
hsa-mir-4516	MIMAT0019053	APLP2	PAR-CLIP	26701625
hsa-mir-3663-3p	MIMAT0018085	APOA1	PAR-CLIP	24398324
hsa-mir-4649-5p	MIMAT0019711	APOC3	PAR-CLIP	21572407|27292025
hsa-mir-6088	MIMAT0023713	APOL6	HITS-CLIP	27418678
hsa-mir-7704	MIMAT0030019	APOL6	HITS-CLIP	27418678
hsa-mir-4497	MIMAT0019032	APPBP2	PAR-CLIP	24398324
hsa-mir-3178	MIMAT0015055	AQP6	PAR-CLIP	22291592
hsa-mir-7704	MIMAT0030019	ARC	PAR-CLIP	26701625
hsa-mir-6800-5p	MIMAT0027500	AREL1	PAR-CLIP	23592263
hsa-mir-8069	MIMAT0030996	ARF6	PAR-CLIP	21572407
hsa-mir-4488	MIMAT0019022	ARGFX	PAR-CLIP	22012620|20371350|27292025
hsa-mir-1237-5p	MIMAT0022946	ARGFX	PAR-CLIP	22012620|20371350|27292025
hsa-mir-4488	MIMAT0019022	ARHGAP18	HITS-CLIP	23824327
hsa-mir-1237-5p	MIMAT0022946	ARHGAP18	HITS-CLIP	23824327
hsa-mir-4530	MIMAT0019069	ARHGAP19-SLIT1	HITS-CLIP	28735896
hsa-mir-663a	MIMAT0003326	ARHGAP31	PAR-CLIP	23592263
hsa-mir-4739	MIMAT0019868	ARHGAP31	PAR-CLIP	23592263
hsa-mir-663a	MIMAT0003326	ARHGAP39	PAR-CLIP	26701625
hsa-mir-4739	MIMAT0019868	ARHGAP39	PAR-CLIP	26701625
hsa-mir-663a	MIMAT0003326	ARHGDIA	PAR-CLIP	26701625
hsa-mir-4674	MIMAT0019756	ARHGDIA	PAR-CLIP	26701625
hsa-mir-1469	MIMAT0007347	ARHGEF18	HITS-CLIP	23313552
hsa-mir-4649-5p	MIMAT0019711	ARL10	PAR-CLIP	27292025
hsa-mir-4530	MIMAT0019069	ARL4C	HITS-CLIP	23824327
hsa-mir-4739	MIMAT0019868	ARL4C	HITS-CLIP	23824327
hsa-mir-663a	MIMAT0003326	ARL8A	PAR-CLIP	26701625
hsa-mir-7704	MIMAT0030019	ARL8A	PAR-CLIP	23592263
hsa-mir-4488	MIMAT0019022	ARPC1B	HITS-CLIP	23824327
hsa-mir-1237-5p	MIMAT0022946	ARPC1B	HITS-CLIP	23824327
hsa-mir-4739	MIMAT0019868	ARSA	HITS-CLIP	23824327
hsa-mir-3196	MIMAT0015080	ASB16	PAR-CLIP	26701625
hsa-mir-4739	MIMAT0019868	ASB16	PAR-CLIP	23592263
hsa-mir-4745-5p	MIMAT0019878	ASB16	HITS-CLIP	23313552|27418678
hsa-mir-6789-5p	MIMAT0027478	ASB16	PAR-CLIP	26701625
hsa-mir-663a	MIMAT0003326	ASB6	PAR-CLIP	23592263|20371350
hsa-mir-3178	MIMAT0015055	ASB6	HITS-CLIP	23824327
hsa-mir-3196	MIMAT0015080	ASCL2	PAR-CLIP	23592263|24398324
hsa-mir-8069	MIMAT0030996	ASPH	PAR-CLIP	23592263
hsa-mir-4516	MIMAT0019053	ASTN2	PAR-CLIP	20371350
hsa-mir-4739	MIMAT0019868	ASXL1	PAR-CLIP	23592263
hsa-mir-3663-3p	MIMAT0018085	ASXL2	HITS-CLIP	23313552
hsa-mir-4530	MIMAT0019069	ATAT1	HITS-CLIP	23824327|23706177
hsa-mir-4649-5p	MIMAT0019711	ATAT1	HITS-CLIP	23824327|23706177
hsa-mir-3196	MIMAT0015080	ATG2A	HITS-CLIP//PAR-CLIP	23446348|21572407|23706177
hsa-mir-4488	MIMAT0019022	ATG2A	HITS-CLIP//PAR-CLIP	23446348|21572407|20371350|23706177|27292025
hsa-mir-1237-5p	MIMAT0022946	ATG2A	HITS-CLIP//PAR-CLIP	23446348|21572407|20371350|23706177|27292025
hsa-mir-4649-5p	MIMAT0019711	ATG9A	PAR-CLIP	26701625
hsa-mir-663a	MIMAT0003326	ATL2	PAR-CLIP	27292025
hsa-mir-4497	MIMAT0019032	ATP13A4	PAR-CLIP	23592263|23446348|21572407
hsa-mir-4497	MIMAT0019032	ATP1B4	PAR-CLIP	27292025
hsa-mir-4739	MIMAT0019868	ATP2A3	PAR-CLIP	23592263
hsa-mir-4488	MIMAT0019022	ATP6AP1	HITS-CLIP	23313552
hsa-mir-1237-5p	MIMAT0022946	ATP6AP1	HITS-CLIP	23313552
hsa-mir-3178	MIMAT0015055	ATP6V0E1	HITS-CLIP	23824327
hsa-mir-6088	MIMAT0023713	ATP6V0E1	PAR-CLIP	27292025
hsa-mir-4530	MIMAT0019069	ATP6V1A	HITS-CLIP	23824327
hsa-mir-4739	MIMAT0019868	ATP6V1A	HITS-CLIP	19536157
hsa-mir-4739	MIMAT0019868	ATP6V1B1	PAR-CLIP	20371350
hsa-mir-4689	MIMAT0019778	ATXN1L	PAR-CLIP	26701625
hsa-mir-4739	MIMAT0019868	ATXN7L3	PAR-CLIP	23592263
hsa-mir-4530	MIMAT0019069	ATXN7L3B	PAR-CLIP	21572407
hsa-mir-4689	MIMAT0019778	AZF1	HITS-CLIP	23313552
hsa-mir-4649-5p	MIMAT0019711	B3GALNT2	PAR-CLIP	27292025
hsa-mir-4530	MIMAT0019069	B3GAT2	PAR-CLIP	22012620
hsa-mir-4674	MIMAT0019756	B4GALT7	HITS-CLIP	23313552
hsa-mir-4516	MIMAT0019053	BACH2	HITS-CLIP	23824327
hsa-mir-4745-5p	MIMAT0019878	BAIAP2L1	PAR-CLIP	27292025
hsa-mir-4674	MIMAT0019756	BAP1	PAR-CLIP	26701625
hsa-mir-663a	MIMAT0003326	BARHL1	PAR-CLIP	23592263|24398324|20371350|27292025
hsa-mir-3178	MIMAT0015055	BARHL1	PAR-CLIP	23592263|24398324|20371350|27292025
hsa-mir-4488	MIMAT0019022	BARHL1	PAR-CLIP	23592263|24398324|20371350|27292025
hsa-mir-4739	MIMAT0019868	BARHL1	PAR-CLIP	23592263|23446348|20371350
hsa-mir-1237-5p	MIMAT0022946	BARHL1	PAR-CLIP	23592263|24398324|20371350|27292025
hsa-mir-3178	MIMAT0015055	BAZ2B	HITS-CLIP	23824327
hsa-mir-3663-3p	MIMAT0018085	BBC3	PAR-CLIP	23592263
hsa-mir-6088	MIMAT0023713	BBC3	PAR-CLIP	23592263|24398324|26701625
hsa-mir-3663-3p	MIMAT0018085	BBS5	HITS-CLIP	23824327
hsa-mir-4739	MIMAT0019868	BBS5	PAR-CLIP	26701625|27292025
hsa-mir-4530	MIMAT0019069	BCAM	PAR-CLIP	23592263
hsa-mir-4689	MIMAT0019778	BCL2L1	PAR-CLIP	23592263|26701625
hsa-mir-4739	MIMAT0019868	BCL2L1	PAR-CLIP	26701625
hsa-mir-4745-5p	MIMAT0019878	BCL2L11	PAR-CLIP	27292025
hsa-mir-4745-5p	MIMAT0019878	BCL2L12	PAR-CLIP	20371350
hsa-mir-4530	MIMAT0019069	BCL2L13	PAR-CLIP	23446348
hsa-mir-4739	MIMAT0019868	BCL2L13	PAR-CLIP	23446348|20371350
hsa-mir-8069	MIMAT0030996	BCL2L14	PAR-CLIP	22100165
hsa-mir-4488	MIMAT0019022	BCL7A	PAR-CLIP	22012620
hsa-mir-1237-5p	MIMAT0022946	BCL7A	PAR-CLIP	22012620
hsa-mir-3196	MIMAT0015080	BCL9L	PAR-CLIP	26701625
hsa-mir-4516	MIMAT0019053	BCL9L	PAR-CLIP	26701625
hsa-mir-4649-5p	MIMAT0019711	BCL9L	PAR-CLIP	26701625
hsa-mir-4674	MIMAT0019756	BDP1	HITS-CLIP	23824327
hsa-mir-4530	MIMAT0019069	BEND4	PAR-CLIP	23592263
hsa-mir-3196	MIMAT0015080	BHMT2	HITS-CLIP	23824327
hsa-mir-3196	MIMAT0015080	BICDL1	PAR-CLIP	23592263|20371350|26701625
hsa-mir-4649-5p	MIMAT0019711	BMP3	HITS-CLIP	23824327
hsa-mir-4497	MIMAT0019032	BPNT1	HITS-CLIP	23824327
hsa-mir-6088	MIMAT0023713	BRD2	PAR-CLIP	26701625
hsa-mir-4739	MIMAT0019868	BRIX1	HITS-CLIP	23313552
hsa-mir-4689	MIMAT0019778	BSCL2	PAR-CLIP	23592263
hsa-mir-4530	MIMAT0019069	BTBD9	HITS-CLIP	19536157
hsa-mir-6088	MIMAT0023713	BTF3L4	PAR-CLIP	21572407|20371350
hsa-mir-3663-3p	MIMAT0018085	BTG2	PAR-CLIP	23592263
hsa-mir-4739	MIMAT0019868	BTG2	PAR-CLIP	23592263|24398324|26701625|27292025
hsa-mir-8069	MIMAT0030996	BTG3	PAR-CLIP	23446348|21572407|20371350
hsa-mir-150-3p	MIMAT0004610	BTLA	PAR-CLIP	23446348|22012620|21572407|20371350
hsa-mir-6800-5p	MIMAT0027500	BUB3	PAR-CLIP	23592263
hsa-mir-3178	MIMAT0015055	BVES	HITS-CLIP	23824327
hsa-mir-4739	MIMAT0019868	BZW1	PAR-CLIP	26701625|27292025
hsa-mir-3196	MIMAT0015080	C10orf55	PAR-CLIP	23592263
hsa-mir-4739	MIMAT0019868	C10orf55	PAR-CLIP	23592263
hsa-mir-4497	MIMAT0019032	C10orf71	PAR-CLIP	23592263|27292025
hsa-mir-663a	MIMAT0003326	C10orf95	PAR-CLIP	26701625
hsa-mir-6800-5p	MIMAT0027500	C11orf1	HITS-CLIP	23313552
hsa-mir-4739	MIMAT0019868	C11orf84	HITS-CLIP//PAR-CLIP	23592263|23313552
hsa-mir-663a	MIMAT0003326	C12orf49	PAR-CLIP	22012620
hsa-mir-4516	MIMAT0019053	C14orf144	PAR-CLIP	23592263
hsa-mir-4689	MIMAT0019778	C16orf58	PAR-CLIP	23592263
hsa-mir-4689	MIMAT0019778	C16orf72	PAR-CLIP	23592263|24398324|21572407
hsa-mir-4739	MIMAT0019868	C19orf47	PAR-CLIP	23592263
hsa-mir-4745-5p	MIMAT0019878	C19orf47	PAR-CLIP	23592263
hsa-mir-4689	MIMAT0019778	C1orf109	PAR-CLIP	22100165
hsa-mir-6088	MIMAT0023713	C1orf50	HITS-CLIP	23824327
hsa-mir-6088	MIMAT0023713	C1orf61	PAR-CLIP	22100165
hsa-mir-4739	MIMAT0019868	C1QTNF6	HITS-CLIP	23824327
hsa-mir-3663-3p	MIMAT0018085	C1RL	PAR-CLIP	23592263
hsa-mir-4689	MIMAT0019778	C1RL	PAR-CLIP	23592263
hsa-mir-4739	MIMAT0019868	C1RL	PAR-CLIP	23592263
hsa-mir-4739	MIMAT0019868	C20orf96	PAR-CLIP	23592263
hsa-mir-6088	MIMAT0023713	C2orf15	HITS-CLIP	23824327
hsa-mir-4530	MIMAT0019069	C2orf71	PAR-CLIP	20371350
hsa-mir-4516	MIMAT0019053	C2orf82	PAR-CLIP	23592263
hsa-mir-4649-5p	MIMAT0019711	C3	HITS-CLIP//PAR-CLIP	21572407|23313552|27292025
hsa-mir-663a	MIMAT0003326	C3orf36	HITS-CLIP	19536157
hsa-mir-3196	MIMAT0015080	C3orf36	PAR-CLIP	23592263
hsa-mir-4530	MIMAT0019069	C3orf36	HITS-CLIP	23824327
hsa-mir-4649-5p	MIMAT0019711	C5AR2	HITS-CLIP	23313552
hsa-mir-6800-5p	MIMAT0027500	C6	HITS-CLIP	23824327
hsa-mir-4689	MIMAT0019778	C6orf106	PAR-CLIP	23592263
hsa-mir-4649-5p	MIMAT0019711	C6orf141	PAR-CLIP	27292025
hsa-mir-4530	MIMAT0019069	C8A	HITS-CLIP	19536157
hsa-mir-7704	MIMAT0030019	C8orf58	PAR-CLIP	26701625
hsa-mir-4497	MIMAT0019032	C8orf82	PAR-CLIP	26701625
hsa-mir-4530	MIMAT0019069	C9orf78	PAR-CLIP	23592263
hsa-mir-4516	MIMAT0019053	CABLES1	PAR-CLIP	23592263
hsa-mir-4689	MIMAT0019778	CACNA1B	HITS-CLIP	23824327|27418678
hsa-mir-8069	MIMAT0030996	CACNA2D3	PAR-CLIP	23592263
hsa-mir-4530	MIMAT0019069	CALM2	PAR-CLIP	23592263|21572407|20371350
hsa-mir-4488	MIMAT0019022	CALM3	PAR-CLIP	26701625
hsa-mir-4649-5p	MIMAT0019711	CALM3	PAR-CLIP	26701625
hsa-mir-1237-5p	MIMAT0022946	CALM3	PAR-CLIP	26701625
hsa-mir-6088	MIMAT0023713	CALM3	PAR-CLIP	23446348|26701625
hsa-mir-663a	MIMAT0003326	CALR	PAR-CLIP	23592263
hsa-mir-4488	MIMAT0019022	CALR	PAR-CLIP	23592263
hsa-mir-4739	MIMAT0019868	CALR	PAR-CLIP	23592263
hsa-mir-1237-5p	MIMAT0022946	CALR	PAR-CLIP	23592263
hsa-mir-8069	MIMAT0030996	CALU	HITS-CLIP	19536157
hsa-mir-4689	MIMAT0019778	CAMK2N1	PAR-CLIP	22100165
hsa-mir-4497	MIMAT0019032	CAMK2N2	HITS-CLIP	19536157
hsa-mir-3663-3p	MIMAT0018085	CAND1	PAR-CLIP	23592263
hsa-mir-4516	MIMAT0019053	CANX	PAR-CLIP	23592263
hsa-mir-8069	MIMAT0030996	CANX	PAR-CLIP	22100165
hsa-mir-4739	MIMAT0019868	CAPN1	PAR-CLIP	26701625
hsa-mir-4739	MIMAT0019868	CAPN15	PAR-CLIP	23592263
hsa-mir-4530	MIMAT0019069	CAPN5	PAR-CLIP	26701625
hsa-mir-6800-5p	MIMAT0027500	CAPN6	HITS-CLIP	23824327
hsa-mir-4516	MIMAT0019053	CAPZA1	HITS-CLIP	23313552
hsa-mir-4745-5p	MIMAT0019878	CARD10	PAR-CLIP	23592263
hsa-mir-3196	MIMAT0015080	CASP16P	PAR-CLIP	23446348|22012620|20371350|27292025
hsa-mir-6088	MIMAT0023713	CASP5	PAR-CLIP	22100165
hsa-mir-4497	MIMAT0019032	CASTOR2	PAR-CLIP	26701625
hsa-mir-4530	MIMAT0019069	CATSPER4	HITS-CLIP	23824327
hsa-mir-3196	MIMAT0015080	CBARP	PAR-CLIP	22100165|22291592
hsa-mir-4488	MIMAT0019022	CBARP	PAR-CLIP	22100165|22291592
hsa-mir-4497	MIMAT0019032	CBARP	PAR-CLIP	27292025
hsa-mir-4649-5p	MIMAT0019711	CBARP	PAR-CLIP	27292025
hsa-mir-1237-5p	MIMAT0022946	CBARP	PAR-CLIP	22100165|22291592
hsa-mir-4739	MIMAT0019868	CBX2	PAR-CLIP	26701625
hsa-mir-4488	MIMAT0019022	CBX6	PAR-CLIP	26701625
hsa-mir-4739	MIMAT0019868	CBX6	PAR-CLIP	26701625
hsa-mir-1237-5p	MIMAT0022946	CBX6	PAR-CLIP	26701625
hsa-mir-3196	MIMAT0015080	CBX8	PAR-CLIP	26701625
hsa-mir-4674	MIMAT0019756	CC2D1B	PAR-CLIP	20371350
hsa-mir-6789-5p	MIMAT0027478	CCDC121	HITS-CLIP	23824327
hsa-mir-3178	MIMAT0015055	CCDC122	HITS-CLIP	23824327
hsa-mir-4530	MIMAT0019069	CCDC14	PAR-CLIP	22012620
hsa-mir-6088	MIMAT0023713	CCDC170	HITS-CLIP	27418678
hsa-mir-4488	MIMAT0019022	CCDC71L	HITS-CLIP//PAR-CLIP	20371350|23313552
hsa-mir-1237-5p	MIMAT0022946	CCDC71L	HITS-CLIP//PAR-CLIP	20371350|23313552
hsa-mir-4516	MIMAT0019053	CCDC80	PAR-CLIP	22100165
hsa-mir-4739	MIMAT0019868	CCL11	PAR-CLIP	23592263
hsa-mir-4516	MIMAT0019053	CCL16	PAR-CLIP	23592263
hsa-mir-4649-5p	MIMAT0019711	CCNB1	HITS-CLIP	23313552
hsa-mir-3663-3p	MIMAT0018085	CCNB1IP1	PAR-CLIP	22100165|23708386|22291592
hsa-mir-4689	MIMAT0019778	CCNB1IP1	PAR-CLIP	26701625
hsa-mir-8069	MIMAT0030996	CCND1	PAR-CLIP	23592263|26701625
hsa-mir-4516	MIMAT0019053	CCND2	PAR-CLIP	23592263
hsa-mir-4739	MIMAT0019868	CCND3	PAR-CLIP	22100165
hsa-mir-4497	MIMAT0019032	CCNF	PAR-CLIP	23592263|26701625
hsa-mir-4516	MIMAT0019053	CCNT1	PAR-CLIP	23446348
hsa-mir-6800-5p	MIMAT0027500	CCNT1	PAR-CLIP	23592263
hsa-mir-4497	MIMAT0019032	CCNY	PAR-CLIP	23592263|23446348
hsa-mir-150-3p	MIMAT0004610	CCR6	Western blot	27935859
hsa-mir-6088	MIMAT0023713	CCR6	HITS-CLIP	23824327|27418678
hsa-mir-3663-3p	MIMAT0018085	CCT6A	CLASH	23622248
hsa-mir-4745-5p	MIMAT0019878	CCT7	PAR-CLIP	26701625
hsa-mir-4497	MIMAT0019032	CD226	PAR-CLIP	26701625
hsa-mir-4530	MIMAT0019069	CD3D	HITS-CLIP	23824327
hsa-mir-4739	MIMAT0019868	CD44	PAR-CLIP	26701625
hsa-mir-150-3p	MIMAT0004610	CD46	PAR-CLIP	21572407
hsa-mir-4516	MIMAT0019053	CDC14B	PAR-CLIP	23446348
hsa-mir-3663-3p	MIMAT0018085	CDC23	PAR-CLIP	21572407
hsa-mir-6088	MIMAT0023713	CDC25B	PAR-CLIP	26701625
hsa-mir-3178	MIMAT0015055	CDC37	PAR-CLIP	26701625|27292025
hsa-mir-4739	MIMAT0019868	CDC37	PAR-CLIP	26701625|27292025
hsa-mir-3663-3p	MIMAT0018085	CDC42SE1	PAR-CLIP	24398324|21572407
hsa-mir-4516	MIMAT0019053	CDC42SE1	PAR-CLIP	23592263
hsa-mir-4530	MIMAT0019069	CDC42SE1	PAR-CLIP	23592263
hsa-mir-4745-5p	MIMAT0019878	CDCA4	PAR-CLIP	23592263
hsa-mir-663a	MIMAT0003326	CDH7	HITS-CLIP	23824327
hsa-mir-3178	MIMAT0015055	CDH7	HITS-CLIP	23824327
hsa-mir-663a	MIMAT0003326	CDK1	Western blot	20514450
hsa-mir-4739	MIMAT0019868	CDK14	PAR-CLIP	23592263
hsa-mir-6800-5p	MIMAT0027500	CDK2	HITS-CLIP	23824327
hsa-mir-8069	MIMAT0030996	CDK2AP2	PAR-CLIP	20371350
hsa-mir-3663-3p	MIMAT0018085	CDK6	PAR-CLIP	26701625
hsa-mir-4739	MIMAT0019868	CDKAL1	HITS-CLIP	23706177
hsa-mir-663a	MIMAT0003326	CDKN1A	Luciferase reporter assay//PAR-CLIP	27105517|26701625
hsa-mir-3196	MIMAT0015080	CDKN1A	PAR-CLIP	26701625
hsa-mir-3663-3p	MIMAT0018085	CDKN1A	PAR-CLIP	26701625
hsa-mir-4488	MIMAT0019022	CDKN1A	PAR-CLIP	26701625
hsa-mir-4516	MIMAT0019053	CDKN1A	PAR-CLIP	23592263|26701625
hsa-mir-4689	MIMAT0019778	CDKN1A	PAR-CLIP	23592263
hsa-mir-1237-5p	MIMAT0022946	CDKN1A	PAR-CLIP	26701625
hsa-mir-7704	MIMAT0030019	CDKN1A	PAR-CLIP	26701625
hsa-mir-7704	MIMAT0030019	CDS2	PAR-CLIP	26701625
hsa-mir-663a	MIMAT0003326	CEBPB	Microarray//qRT-PCR	21378144
hsa-mir-4516	MIMAT0019053	CEBPB	PAR-CLIP	26701625
hsa-mir-4689	MIMAT0019778	CELSR2	PAR-CLIP	20371350
hsa-mir-150-3p	MIMAT0004610	CENPCP1	PAR-CLIP	23446348
hsa-mir-663a	MIMAT0003326	CENPO	PAR-CLIP	26701625
hsa-mir-7704	MIMAT0030019	CENPO	PAR-CLIP	26701625
hsa-mir-6088	MIMAT0023713	CENPP	PAR-CLIP	20371350
hsa-mir-4739	MIMAT0019868	CENPQ	PAR-CLIP	20371350
hsa-mir-3178	MIMAT0015055	CEP57L1	HITS-CLIP	23824327
hsa-mir-4488	MIMAT0019022	CERS1	PAR-CLIP	20371350
hsa-mir-1237-5p	MIMAT0022946	CERS1	PAR-CLIP	20371350
hsa-mir-6088	MIMAT0023713	CERS4	HITS-CLIP	23824327|27418678
hsa-mir-4516	MIMAT0019053	CES2	PAR-CLIP	23592263
hsa-mir-4739	MIMAT0019868	CES2	PAR-CLIP	23592263
hsa-mir-4739	MIMAT0019868	CFAP65	PAR-CLIP	23708386
hsa-mir-4739	MIMAT0019868	CFL1	PAR-CLIP	26701625
hsa-mir-4516	MIMAT0019053	CHAC1	PAR-CLIP	23592263
hsa-mir-4689	MIMAT0019778	CHCHD5	HITS-CLIP	23824327
hsa-mir-4739	MIMAT0019868	CHRDL1	HITS-CLIP//PAR-CLIP	23592263|24398324|22012620|23706177|26701625|27292025
hsa-mir-4649-5p	MIMAT0019711	CHRFAM7A	HITS-CLIP	23313552
hsa-mir-4674	MIMAT0019756	CHST3	HITS-CLIP	23824327
hsa-mir-4649-5p	MIMAT0019711	CHST6	HITS-CLIP	23313552
hsa-mir-4739	MIMAT0019868	CIITA	HITS-CLIP	23706177
hsa-mir-4689	MIMAT0019778	CKAP2L	PAR-CLIP	20371350
hsa-mir-4739	MIMAT0019868	CLASP1	PAR-CLIP	23592263|20371350
hsa-mir-663a	MIMAT0003326	CLCN7	PAR-CLIP	23592263
hsa-mir-3196	MIMAT0015080	CLCN7	PAR-CLIP	23592263
hsa-mir-4689	MIMAT0019778	CLDN1	HITS-CLIP	23824327
hsa-mir-4745-5p	MIMAT0019878	CLDN4	PAR-CLIP	26701625
hsa-mir-6088	MIMAT0023713	CLEC17A	PAR-CLIP	26701625
hsa-mir-4689	MIMAT0019778	CLIC4	PAR-CLIP	22100165
hsa-mir-4739	MIMAT0019868	CLSTN1	PAR-CLIP	23592263|20371350|26701625
hsa-mir-4516	MIMAT0019053	CLSTN2	PAR-CLIP	27292025
hsa-mir-4488	MIMAT0019022	CLU	PAR-CLIP	26701625
hsa-mir-1237-5p	MIMAT0022946	CLU	PAR-CLIP	26701625
hsa-mir-4674	MIMAT0019756	CLUAP1	HITS-CLIP	23824327
hsa-mir-4739	MIMAT0019868	CLUH	PAR-CLIP	26701625
hsa-mir-6088	MIMAT0023713	CMPK1	PAR-CLIP	23446348
hsa-mir-4516	MIMAT0019053	CMTM4	PAR-CLIP	20371350
hsa-mir-4739	MIMAT0019868	CNBP	PAR-CLIP	23592263|20371350
hsa-mir-4739	MIMAT0019868	CNOT6L	PAR-CLIP	23592263
hsa-mir-4516	MIMAT0019053	COL5A1	PAR-CLIP	23592263
hsa-mir-6088	MIMAT0023713	COMMD2	PAR-CLIP	20371350
hsa-mir-7704	MIMAT0030019	COMMD5	PAR-CLIP	23592263
hsa-mir-4488	MIMAT0019022	COX10	PAR-CLIP	23592263
hsa-mir-1237-5p	MIMAT0022946	COX10	PAR-CLIP	23592263
hsa-mir-6800-5p	MIMAT0027500	COX18	PAR-CLIP	27292025
hsa-mir-6088	MIMAT0023713	COX6B1	HITS-CLIP	27418678
hsa-mir-3178	MIMAT0015055	CPLX1	PAR-CLIP	23592263
hsa-mir-4649-5p	MIMAT0019711	CPM	HITS-CLIP	23706177
hsa-mir-7704	MIMAT0030019	CPNE5	PAR-CLIP	23592263
hsa-mir-150-3p	MIMAT0004610	CREBZF	PAR-CLIP	21572407
hsa-mir-6088	MIMAT0023713	CREG2	HITS-CLIP	23824327
hsa-mir-4516	MIMAT0019053	CRMP1	PAR-CLIP	20371350
hsa-mir-4739	MIMAT0019868	CRTC2	PAR-CLIP	23592263
hsa-mir-3178	MIMAT0015055	CRX	HITS-CLIP	23824327
hsa-mir-4488	MIMAT0019022	CS	PAR-CLIP	23592263
hsa-mir-1237-5p	MIMAT0022946	CS	PAR-CLIP	23592263
hsa-mir-3663-3p	MIMAT0018085	CSGALNACT1	HITS-CLIP	19536157
hsa-mir-663a	MIMAT0003326	CSK	PAR-CLIP	26701625
hsa-mir-3196	MIMAT0015080	CSK	PAR-CLIP	26701625
hsa-mir-4530	MIMAT0019069	CSNK1E	PAR-CLIP	23592263
hsa-mir-6088	MIMAT0023713	CSRNP2	PAR-CLIP	23592263
hsa-mir-3178	MIMAT0015055	CSTF1	HITS-CLIP	23824327
hsa-mir-663a	MIMAT0003326	CTDNEP1	PAR-CLIP	23592263
hsa-mir-4739	MIMAT0019868	CTDSP2	PAR-CLIP	23592263
hsa-mir-4689	MIMAT0019778	CTIF	PAR-CLIP	22100165
hsa-mir-150-3p	MIMAT0004610	CTNNB1	Immunoblot//Luciferase reporter assay//qRT-PCR	26935950
hsa-mir-663a	MIMAT0003326	CTTN	PAR-CLIP	20371350
hsa-mir-4497	MIMAT0019032	CTTN	PAR-CLIP	26701625
hsa-mir-4488	MIMAT0019022	CTXN1	PAR-CLIP	26701625
hsa-mir-1237-5p	MIMAT0022946	CTXN1	PAR-CLIP	26701625
hsa-mir-6088	MIMAT0023713	CTXN1	PAR-CLIP	26701625
hsa-mir-4739	MIMAT0019868	CXCL5	PAR-CLIP	27292025
hsa-mir-663a	MIMAT0003326	CXCR4	Western blot	28061765
hsa-mir-4739	MIMAT0019868	CYLD	HITS-CLIP	23824327
hsa-mir-663a	MIMAT0003326	CYTH2	HITS-CLIP	19536157
hsa-mir-4674	MIMAT0019756	DAO	HITS-CLIP	19536157
hsa-mir-150-3p	MIMAT0004610	DAZAP2	PAR-CLIP	26701625|27292025
hsa-mir-4516	MIMAT0019053	DAZAP2	PAR-CLIP	23592263|22012620
hsa-mir-4745-5p	MIMAT0019878	DAZAP2	PAR-CLIP	23592263|22012620
hsa-mir-6088	MIMAT0023713	DBT	PAR-CLIP	23446348
hsa-mir-4739	MIMAT0019868	DCAF11	PAR-CLIP	26701625
hsa-mir-4516	MIMAT0019053	DCAF7	PAR-CLIP	20371350
hsa-mir-4739	MIMAT0019868	DCAF7	PAR-CLIP	21572407
hsa-mir-6088	MIMAT0023713	DCTN6	HITS-CLIP	23824327
hsa-mir-3663-3p	MIMAT0018085	DCXR	PAR-CLIP	26701625
hsa-mir-4739	MIMAT0019868	DDA1	PAR-CLIP	26701625
hsa-mir-4745-5p	MIMAT0019878	DDA1	PAR-CLIP	23592263
hsa-mir-663a	MIMAT0003326	DDI2	PAR-CLIP	23446348|21572407|20371350
hsa-mir-4739	MIMAT0019868	DDN	PAR-CLIP	23592263
hsa-mir-3663-3p	MIMAT0018085	DDR1	PAR-CLIP	27292025
hsa-mir-4739	MIMAT0019868	DDR1	PAR-CLIP	26701625
hsa-mir-4488	MIMAT0019022	DDX39B	PAR-CLIP	23592263|24398324|23446348|21572407|20371350|26701625
hsa-mir-1237-5p	MIMAT0022946	DDX39B	PAR-CLIP	23592263|24398324|23446348|21572407|20371350|26701625
hsa-mir-4689	MIMAT0019778	DDX3X	PAR-CLIP	23592263|22012620
hsa-mir-4649-5p	MIMAT0019711	DEFB105A	HITS-CLIP	23824327|23313552
hsa-mir-4649-5p	MIMAT0019711	DEFB105B	HITS-CLIP	23824327|23313552
hsa-mir-150-3p	MIMAT0004610	DENND4C	HITS-CLIP//PAR-CLIP	24398324|23446348|21572407|20371350|27292025
hsa-mir-3178	MIMAT0015055	DENND6B	HITS-CLIP	23824327
hsa-mir-4739	MIMAT0019868	DESI1	HITS-CLIP	23824327
hsa-mir-4488	MIMAT0019022	DGCR8	PAR-CLIP	26701625
hsa-mir-1237-5p	MIMAT0022946	DGCR8	PAR-CLIP	26701625
hsa-mir-4530	MIMAT0019069	DGKE	HITS-CLIP	19536157
hsa-mir-663a	MIMAT0003326	DHTKD1	HITS-CLIP	23824327
hsa-mir-150-3p	MIMAT0004610	DHX33	PAR-CLIP	23592263|26701625
hsa-mir-6800-5p	MIMAT0027500	DICER1	PAR-CLIP	23592263
hsa-mir-8069	MIMAT0030996	DICER1	PAR-CLIP	21572407
hsa-mir-3663-3p	MIMAT0018085	DIRAS1	HITS-CLIP	19536157
hsa-mir-4530	MIMAT0019069	DMPK	HITS-CLIP//PAR-CLIP	21572407|24906430|23824327|22927820
hsa-mir-3178	MIMAT0015055	DNA2	HITS-CLIP	23824327|23313552
hsa-mir-4649-5p	MIMAT0019711	DNA2	HITS-CLIP	23313552
hsa-mir-4745-5p	MIMAT0019878	DNAH17	HITS-CLIP	23824327
hsa-mir-4516	MIMAT0019053	DNAJC10	PAR-CLIP	23592263|24398324|23446348|22012620|21572407
hsa-mir-4530	MIMAT0019069	DNAJC28	HITS-CLIP	19536157
hsa-mir-6088	MIMAT0023713	DNTTIP2	PAR-CLIP	27292025
hsa-mir-3663-3p	MIMAT0018085	DOT1L	PAR-CLIP	26701625
hsa-mir-663a	MIMAT0003326	DPF1	PAR-CLIP	23592263
hsa-mir-3196	MIMAT0015080	DPF1	PAR-CLIP	23592263
hsa-mir-4516	MIMAT0019053	DPY19L4	HITS-CLIP	19536157
hsa-mir-4674	MIMAT0019756	DRAXIN	HITS-CLIP	23824327
hsa-mir-4497	MIMAT0019032	DSN1	PAR-CLIP	27292025
hsa-mir-3663-3p	MIMAT0018085	DTHD1	PAR-CLIP	23592263
hsa-mir-4739	MIMAT0019868	DTHD1	PAR-CLIP	23592263
hsa-mir-663a	MIMAT0003326	DUSP14	PAR-CLIP	26701625
hsa-mir-4530	MIMAT0019069	DUSP2	PAR-CLIP	23592263
hsa-mir-4497	MIMAT0019032	DUSP22	HITS-CLIP	23824327
hsa-mir-4739	MIMAT0019868	DUSP28	PAR-CLIP	21572407
hsa-mir-4739	MIMAT0019868	DUSP7	PAR-CLIP	23592263|20371350
hsa-mir-4516	MIMAT0019053	DUSP9	PAR-CLIP	27292025
hsa-mir-4739	MIMAT0019868	DUSP9	PAR-CLIP	23592263|27292025
hsa-mir-4530	MIMAT0019069	DZIP1L	HITS-CLIP	23824327
hsa-mir-4745-5p	MIMAT0019878	ECE1	PAR-CLIP	26701625
hsa-mir-4689	MIMAT0019778	EDA2R	PAR-CLIP	22012620
hsa-mir-4674	MIMAT0019756	EDARADD	PAR-CLIP	23592263|23446348|21572407
hsa-mir-6800-5p	MIMAT0027500	EDN1	PAR-CLIP	23592263
hsa-mir-663a	MIMAT0003326	EEF1A2	Luciferase reporter assay//qRT-PCR//Western blot	23695020
hsa-mir-4745-5p	MIMAT0019878	EFNA3	PAR-CLIP	23592263
hsa-mir-4488	MIMAT0019022	EFNB1	PAR-CLIP	26701625
hsa-mir-1237-5p	MIMAT0022946	EFNB1	PAR-CLIP	26701625
hsa-mir-4745-5p	MIMAT0019878	EFTUD2	PAR-CLIP	23592263
hsa-mir-4488	MIMAT0019022	EIF1	PAR-CLIP	23592263|20371350
hsa-mir-4689	MIMAT0019778	EIF1	PAR-CLIP	20371350
hsa-mir-1237-5p	MIMAT0022946	EIF1	PAR-CLIP	23592263|20371350
hsa-mir-4530	MIMAT0019069	EIF1AD	PAR-CLIP	26701625
hsa-mir-4530	MIMAT0019069	EIF4EBP2	HITS-CLIP	23824327
hsa-mir-6800-5p	MIMAT0027500	EIF4EBP2	HITS-CLIP	23824327
hsa-mir-4745-5p	MIMAT0019878	EIF5A	PAR-CLIP	26701625
hsa-mir-4488	MIMAT0019022	EIF5AL1	PAR-CLIP	23592263
hsa-mir-4516	MIMAT0019053	EIF5AL1	PAR-CLIP	27292025
hsa-mir-4674	MIMAT0019756	EIF5AL1	PAR-CLIP	23592263
hsa-mir-4745-5p	MIMAT0019878	EIF5AL1	PAR-CLIP	23592263|26701625
hsa-mir-1237-5p	MIMAT0022946	EIF5AL1	PAR-CLIP	23592263
hsa-mir-4689	MIMAT0019778	ELF3	PAR-CLIP	26701625
hsa-mir-4739	MIMAT0019868	ELFN2	PAR-CLIP	26701625
hsa-mir-4745-5p	MIMAT0019878	ELK4	PAR-CLIP	26701625
hsa-mir-4739	MIMAT0019868	ELL	PAR-CLIP	26701625
hsa-mir-6088	MIMAT0023713	ELMOD1	HITS-CLIP	27418678
hsa-mir-6800-5p	MIMAT0027500	ELMSAN1	HITS-CLIP	23313552
hsa-mir-4488	MIMAT0019022	ELOF1	HITS-CLIP	19536157
hsa-mir-1237-5p	MIMAT0022946	ELOF1	HITS-CLIP	19536157
hsa-mir-4516	MIMAT0019053	ELOVL6	PAR-CLIP	22291592
hsa-mir-3178	MIMAT0015055	ELP2	HITS-CLIP	23824327
hsa-mir-4689	MIMAT0019778	ELP2	PAR-CLIP	22100165
hsa-mir-6088	MIMAT0023713	ELP2	HITS-CLIP	23824327
hsa-mir-4516	MIMAT0019053	ELP6	PAR-CLIP	22100165
hsa-mir-4530	MIMAT0019069	EMC7	HITS-CLIP	23824327|19536157
hsa-mir-150-3p	MIMAT0004610	EMP1	HITS-CLIP//PAR-CLIP	23446348|20371350|23706177
hsa-mir-4745-5p	MIMAT0019878	EMP1	HITS-CLIP//PAR-CLIP	23446348|20371350|23706177
hsa-mir-4516	MIMAT0019053	EMP2	HITS-CLIP	23313552
hsa-mir-4689	MIMAT0019778	EMX1	PAR-CLIP	22100165
hsa-mir-4516	MIMAT0019053	EN2	PAR-CLIP	20371350
hsa-mir-4689	MIMAT0019778	EN2	PAR-CLIP	23592263
hsa-mir-8069	MIMAT0030996	EN2	PAR-CLIP	23446348|21572407|20371350
hsa-mir-3196	MIMAT0015080	ENG	PAR-CLIP	23592263
hsa-mir-6088	MIMAT0023713	ENO4	PAR-CLIP	23446348
hsa-mir-3196	MIMAT0015080	ENTPD5	PAR-CLIP	21572407|20371350|26701625
hsa-mir-4488	MIMAT0019022	ENTPD5	PAR-CLIP	21572407|20371350|26701625
hsa-mir-1237-5p	MIMAT0022946	ENTPD5	PAR-CLIP	21572407|20371350|26701625
hsa-mir-4739	MIMAT0019868	ENTPD7	PAR-CLIP	23592263
hsa-mir-4745-5p	MIMAT0019878	EP300	HITS-CLIP	24906430|27418678
hsa-mir-6088	MIMAT0023713	EPB42	HITS-CLIP	27418678
hsa-mir-3178	MIMAT0015055	EPG5	HITS-CLIP	23313552
hsa-mir-4530	MIMAT0019069	EPOR	HITS-CLIP	23824327
hsa-mir-4488	MIMAT0019022	ERCC1	PAR-CLIP	27292025
hsa-mir-1237-5p	MIMAT0022946	ERCC1	PAR-CLIP	27292025
hsa-mir-3663-3p	MIMAT0018085	EREG	PAR-CLIP	26701625
hsa-mir-4674	MIMAT0019756	EREG	PAR-CLIP	26701625
hsa-mir-6800-5p	MIMAT0027500	ERGIC2	PAR-CLIP	23592263
hsa-mir-4689	MIMAT0019778	ESYT1	PAR-CLIP	26701625
hsa-mir-4530	MIMAT0019069	ETV7	PAR-CLIP	23592263
hsa-mir-663a	MIMAT0003326	EVI5L	PAR-CLIP	21572407
hsa-mir-4488	MIMAT0019022	EVI5L	PAR-CLIP	21572407
hsa-mir-1237-5p	MIMAT0022946	EVI5L	PAR-CLIP	21572407
hsa-mir-4674	MIMAT0019756	EXOSC2	HITS-CLIP	23824327
hsa-mir-4745-5p	MIMAT0019878	EXOSC2	PAR-CLIP	20371350
hsa-mir-4674	MIMAT0019756	F2	HITS-CLIP//PAR-CLIP	23446348|21572407|27292025
hsa-mir-4739	MIMAT0019868	FAAH	PAR-CLIP	23592263
hsa-mir-6088	MIMAT0023713	FAM102A	PAR-CLIP	26701625
hsa-mir-4530	MIMAT0019069	FAM107A	HITS-CLIP	23824327
hsa-mir-6088	MIMAT0023713	FAM120AOS	PAR-CLIP	22100165
hsa-mir-4516	MIMAT0019053	FAM129B	PAR-CLIP	20371350
hsa-mir-4739	MIMAT0019868	FAM129B	PAR-CLIP	26701625
hsa-mir-4530	MIMAT0019069	FAM131B	HITS-CLIP	19536157
hsa-mir-4488	MIMAT0019022	FAM151B	HITS-CLIP	23824327
hsa-mir-1237-5p	MIMAT0022946	FAM151B	HITS-CLIP	23824327
hsa-mir-3196	MIMAT0015080	FAM193A	HITS-CLIP	19536157
hsa-mir-4530	MIMAT0019069	FAM193B	PAR-CLIP	27292025
hsa-mir-4739	MIMAT0019868	FAM198A	HITS-CLIP	23824327
hsa-mir-4739	MIMAT0019868	FAM210A	PAR-CLIP	23592263
hsa-mir-3663-3p	MIMAT0018085	FAM234A	PAR-CLIP	23592263
hsa-mir-4649-5p	MIMAT0019711	FAM234B	HITS-CLIP//PAR-CLIP	23313552|27292025
hsa-mir-6088	MIMAT0023713	FAM241A	HITS-CLIP	27418678
hsa-mir-7704	MIMAT0030019	FAM241A	HITS-CLIP	27418678
hsa-mir-3196	MIMAT0015080	FAM43A	PAR-CLIP	23592263|20371350
hsa-mir-3663-3p	MIMAT0018085	FAM53C	PAR-CLIP	26701625
hsa-mir-6088	MIMAT0023713	FAM71F2	HITS-CLIP	23824327|27418678
hsa-mir-4497	MIMAT0019032	FAM83C	PAR-CLIP	20371350
hsa-mir-663a	MIMAT0003326	FAM83H	PAR-CLIP	23592263|20371350|26701625
hsa-mir-4516	MIMAT0019053	FAM83H	PAR-CLIP	23592263
hsa-mir-4497	MIMAT0019032	FANCA	HITS-CLIP	23824327
hsa-mir-4488	MIMAT0019022	FARSA	PAR-CLIP	23592263
hsa-mir-1237-5p	MIMAT0022946	FARSA	PAR-CLIP	23592263
hsa-mir-6088	MIMAT0023713	FAXC	HITS-CLIP	23824327|21572407|27418678
hsa-mir-4488	MIMAT0019022	FBRS	PAR-CLIP	26701625
hsa-mir-1237-5p	MIMAT0022946	FBRS	PAR-CLIP	26701625
hsa-mir-4497	MIMAT0019032	FBXL18	PAR-CLIP	26701625
hsa-mir-4516	MIMAT0019053	FBXW11	PAR-CLIP	22100165
hsa-mir-4674	MIMAT0019756	FDX1	PAR-CLIP	23592263|20371350|27292025
hsa-mir-3178	MIMAT0015055	FEM1A	PAR-CLIP	26701625
hsa-mir-3196	MIMAT0015080	FEM1A	PAR-CLIP	23592263
hsa-mir-4488	MIMAT0019022	FEM1A	PAR-CLIP	23592263
hsa-mir-1237-5p	MIMAT0022946	FEM1A	PAR-CLIP	23592263
hsa-mir-4689	MIMAT0019778	FEM1C	PAR-CLIP	22100165
hsa-mir-6088	MIMAT0023713	FGD6	HITS-CLIP	23824327
hsa-mir-7704	MIMAT0030019	FGF19	HITS-CLIP	23824327
hsa-mir-4530	MIMAT0019069	FGFR1	PAR-CLIP	26701625
hsa-mir-7704	MIMAT0030019	FIBCD1	PAR-CLIP	27292025
hsa-mir-4530	MIMAT0019069	FJX1	PAR-CLIP	22012620
hsa-mir-4739	MIMAT0019868	FKBP5	PAR-CLIP	23592263
hsa-mir-4739	MIMAT0019868	FKBP8	PAR-CLIP	26701625
hsa-mir-4689	MIMAT0019778	FLOT2	HITS-CLIP	23313552
hsa-mir-7704	MIMAT0030019	FLYWCH1	HITS-CLIP	19536157
hsa-mir-4516	MIMAT0019053	FMNL3	PAR-CLIP	20371350
hsa-mir-7704	MIMAT0030019	FN3K	PAR-CLIP	23592263
hsa-mir-4530	MIMAT0019069	FOS	PAR-CLIP	23592263
hsa-mir-663a	MIMAT0003326	FOSB	Microarray//qRT-PCR	21378144
hsa-mir-6800-5p	MIMAT0027500	FOXJ3	PAR-CLIP	20371350
hsa-mir-3196	MIMAT0015080	FOXK1	PAR-CLIP	26701625|27292025
hsa-mir-4516	MIMAT0019053	FOXO6	PAR-CLIP	26701625
hsa-mir-4745-5p	MIMAT0019878	FPR1	HITS-CLIP	23824327
hsa-mir-663a	MIMAT0003326	FSCN1	PAR-CLIP	20371350|26701625
hsa-mir-3196	MIMAT0015080	FSCN1	PAR-CLIP	20371350|26701625
hsa-mir-3663-3p	MIMAT0018085	FSCN1	PAR-CLIP	23592263
hsa-mir-6088	MIMAT0023713	FSCN1	PAR-CLIP	26701625
hsa-mir-6088	MIMAT0023713	FSD2	HITS-CLIP	23824327
hsa-mir-6789-5p	MIMAT0027478	FSTL3	HITS-CLIP	19536157
hsa-mir-4516	MIMAT0019053	FSTL4	PAR-CLIP	23592263
hsa-mir-4516	MIMAT0019053	FUS	PAR-CLIP	27292025
hsa-mir-8069	MIMAT0030996	FUT1	HITS-CLIP	19536157
hsa-mir-4530	MIMAT0019069	FUT4	HITS-CLIP	19536157
hsa-mir-4649-5p	MIMAT0019711	FUT9	PAR-CLIP	21572407
hsa-mir-663a	MIMAT0003326	FXN	PAR-CLIP	20371350
hsa-mir-4516	MIMAT0019053	FXR2	PAR-CLIP	23592263
hsa-mir-3178	MIMAT0015055	FXYD1	PAR-CLIP	23592263
hsa-mir-3196	MIMAT0015080	FXYD1	PAR-CLIP	23592263
hsa-mir-4488	MIMAT0019022	FXYD1	PAR-CLIP	23592263
hsa-mir-1237-5p	MIMAT0022946	FXYD1	PAR-CLIP	23592263
hsa-mir-4674	MIMAT0019756	G3BP1	PAR-CLIP	21572407
hsa-mir-6800-5p	MIMAT0027500	G3BP1	PAR-CLIP	23592263
hsa-mir-7704	MIMAT0030019	G3BP1	PAR-CLIP	23592263
hsa-mir-4488	MIMAT0019022	G6PC3	PAR-CLIP	27292025
hsa-mir-1237-5p	MIMAT0022946	G6PC3	PAR-CLIP	27292025
hsa-mir-4739	MIMAT0019868	GABARAP	PAR-CLIP	27292025
hsa-mir-6088	MIMAT0023713	GALNT6	HITS-CLIP	23824327
hsa-mir-4689	MIMAT0019778	GAPVD1	PAR-CLIP	27292025
hsa-mir-3663-3p	MIMAT0018085	GAS2L3	PAR-CLIP	23446348
hsa-mir-4516	MIMAT0019053	GATA2	PAR-CLIP	26701625
hsa-mir-4516	MIMAT0019053	GATA6	PAR-CLIP	23592263|27292025
hsa-mir-4530	MIMAT0019069	GATA6	PAR-CLIP	23446348|21572407
hsa-mir-4739	MIMAT0019868	GATA6	HITS-CLIP//PAR-CLIP	23592263|24398324|23446348|22012620|20371350|23706177|26701625|27418678
hsa-mir-663a	MIMAT0003326	GATAD2A	PAR-CLIP	26701625
hsa-mir-3196	MIMAT0015080	GATAD2A	PAR-CLIP	26701625
hsa-mir-4745-5p	MIMAT0019878	GATAD2A	PAR-CLIP	23592263|27292025
hsa-mir-8069	MIMAT0030996	GATM	PAR-CLIP	26701625
hsa-mir-4739	MIMAT0019868	GCDH	PAR-CLIP	23592263
hsa-mir-150-3p	MIMAT0004610	GCFC2	PAR-CLIP	27292025
hsa-mir-4488	MIMAT0019022	GDE1	PAR-CLIP	27292025
hsa-mir-4674	MIMAT0019756	GDE1	HITS-CLIP	19536157
hsa-mir-1237-5p	MIMAT0022946	GDE1	PAR-CLIP	27292025
hsa-mir-7704	MIMAT0030019	GDE1	HITS-CLIP	19536157
hsa-mir-6789-5p	MIMAT0027478	GDI1	PAR-CLIP	26701625
hsa-mir-4516	MIMAT0019053	GFPT2	PAR-CLIP	22012620|21572407
hsa-mir-6088	MIMAT0023713	GGA2	PAR-CLIP	22012620
hsa-mir-663a	MIMAT0003326	GIGYF1	PAR-CLIP	26701625
hsa-mir-4516	MIMAT0019053	GIGYF1	PAR-CLIP	23592263
hsa-mir-4739	MIMAT0019868	GIGYF1	PAR-CLIP	24398324|23446348
hsa-mir-4739	MIMAT0019868	GIPC1	PAR-CLIP	26701625
hsa-mir-6088	MIMAT0023713	GJD2	HITS-CLIP	22927820
hsa-mir-6088	MIMAT0023713	GLB1L	HITS-CLIP	27418678
hsa-mir-4649-5p	MIMAT0019711	GLB1L3	PAR-CLIP	27292025
hsa-mir-6789-5p	MIMAT0027478	GLIS2	PAR-CLIP	26701625
hsa-mir-6800-5p	MIMAT0027500	GLO1	PAR-CLIP	23592263|26701625
hsa-mir-6088	MIMAT0023713	GLRA3	PAR-CLIP	23592263
hsa-mir-4745-5p	MIMAT0019878	GLUL	PAR-CLIP	23446348
hsa-mir-6088	MIMAT0023713	GLUL	HITS-CLIP	19536157
hsa-mir-4739	MIMAT0019868	GLYR1	PAR-CLIP	23592263
hsa-mir-663a	MIMAT0003326	GMDS	HITS-CLIP	19536157
hsa-mir-3196	MIMAT0015080	GMDS	HITS-CLIP	19536157
hsa-mir-6088	MIMAT0023713	GMEB1	HITS-CLIP	27418678
hsa-mir-3196	MIMAT0015080	GMEB2	PAR-CLIP	26701625
hsa-mir-4488	MIMAT0019022	GMEB2	PAR-CLIP	26701625
hsa-mir-4530	MIMAT0019069	GMEB2	PAR-CLIP	26701625
hsa-mir-1237-5p	MIMAT0022946	GMEB2	PAR-CLIP	26701625
hsa-mir-4516	MIMAT0019053	GMFB	PAR-CLIP	23592263|24398324|23446348|21572407|20371350
hsa-mir-663a	MIMAT0003326	GNAI2	PAR-CLIP	23592263|20371350
hsa-mir-3196	MIMAT0015080	GNAI2	PAR-CLIP	26701625
hsa-mir-4488	MIMAT0019022	GNAI2	PAR-CLIP	26701625
hsa-mir-4530	MIMAT0019069	GNAI2	PAR-CLIP	26701625
hsa-mir-1237-5p	MIMAT0022946	GNAI2	PAR-CLIP	26701625
hsa-mir-4739	MIMAT0019868	GNB1L	PAR-CLIP	23592263
hsa-mir-4488	MIMAT0019022	GNB2	PAR-CLIP	23592263
hsa-mir-1237-5p	MIMAT0022946	GNB2	PAR-CLIP	23592263
hsa-mir-4739	MIMAT0019868	GNG3	PAR-CLIP	23592263
hsa-mir-4745-5p	MIMAT0019878	GNL1	PAR-CLIP	23592263
hsa-mir-150-3p	MIMAT0004610	GNL3L	PAR-CLIP	23446348|22012620|21572407
hsa-mir-4516	MIMAT0019053	GOLGA8H	PAR-CLIP	22100165
hsa-mir-4516	MIMAT0019053	GOLGA8J	PAR-CLIP	22100165
hsa-mir-4516	MIMAT0019053	GOLGA8M	PAR-CLIP	22100165
hsa-mir-3663-3p	MIMAT0018085	GOSR1	HITS-CLIP	23824327
hsa-mir-3178	MIMAT0015055	GPAT4	HITS-CLIP	23824327
hsa-mir-3196	MIMAT0015080	GPAT4	PAR-CLIP	23592263|24398324
hsa-mir-4488	MIMAT0019022	GPAT4	PAR-CLIP	23592263|24398324
hsa-mir-1237-5p	MIMAT0022946	GPAT4	PAR-CLIP	23592263|24398324
hsa-mir-4516	MIMAT0019053	GPIHBP1	PAR-CLIP	23592263
hsa-mir-4739	MIMAT0019868	GPR107	PAR-CLIP	23592263|26701625
hsa-mir-4530	MIMAT0019069	GPR132	HITS-CLIP	19536157
hsa-mir-4516	MIMAT0019053	GPR137C	PAR-CLIP	23592263|24398324|23446348|21572407
hsa-mir-4530	MIMAT0019069	GPR146	HITS-CLIP	19536157
hsa-mir-4516	MIMAT0019053	GPR173	PAR-CLIP	20371350
hsa-mir-663a	MIMAT0003326	GPR20	PAR-CLIP	23592263|20371350|26701625
hsa-mir-4530	MIMAT0019069	GPRC5A	HITS-CLIP	24906430|23824327|23313552|27418678
hsa-mir-4745-5p	MIMAT0019878	GPRC5B	PAR-CLIP	27292025
hsa-mir-4674	MIMAT0019756	GPX1	PAR-CLIP	23446348|20371350
hsa-mir-4745-5p	MIMAT0019878	GRAP2	HITS-CLIP	19536157
hsa-mir-663a	MIMAT0003326	GRB2	PAR-CLIP	23592263|26701625
hsa-mir-4530	MIMAT0019069	GRID1	HITS-CLIP	19536157
hsa-mir-4516	MIMAT0019053	GRK4	PAR-CLIP	27292025
hsa-mir-4745-5p	MIMAT0019878	GRK5	PAR-CLIP	23592263
hsa-mir-8069	MIMAT0030996	GSTK1	PAR-CLIP	23446348
hsa-mir-6088	MIMAT0023713	GTF2H5	HITS-CLIP	23824327
hsa-mir-4739	MIMAT0019868	GTF3C1	PAR-CLIP	26701625
hsa-mir-4739	MIMAT0019868	GTF3C3	HITS-CLIP	23824327
hsa-mir-4649-5p	MIMAT0019711	GUF1	PAR-CLIP	21572407
hsa-mir-6088	MIMAT0023713	GXYLT1	PAR-CLIP	23592263|24398324
hsa-mir-663a	MIMAT0003326	H2AFX	PAR-CLIP	23592263
hsa-mir-3196	MIMAT0015080	H2AFX	PAR-CLIP	23592263|23446348|20371350
hsa-mir-4488	MIMAT0019022	H2AFX	PAR-CLIP	23592263
hsa-mir-1237-5p	MIMAT0022946	H2AFX	PAR-CLIP	23592263
hsa-mir-6088	MIMAT0023713	HAAO	PAR-CLIP	23592263
hsa-mir-4739	MIMAT0019868	HACE1	PAR-CLIP	23592263
hsa-mir-4516	MIMAT0019053	HAL	PAR-CLIP	22100165
hsa-mir-6789-5p	MIMAT0027478	HBP1	PAR-CLIP	21572407|20371350
hsa-mir-3663-3p	MIMAT0018085	HDGF	PAR-CLIP	23446348
hsa-mir-4488	MIMAT0019022	HDGF	PAR-CLIP	23592263
hsa-mir-1237-5p	MIMAT0022946	HDGF	PAR-CLIP	23592263
hsa-mir-4739	MIMAT0019868	HDLBP	PAR-CLIP	23592263
hsa-mir-4649-5p	MIMAT0019711	HERPUD2	HITS-CLIP	23313552
hsa-mir-4530	MIMAT0019069	HES4	PAR-CLIP	23592263|23446348|22012620|20371350|26701625|27292025
hsa-mir-4739	MIMAT0019868	HES6	PAR-CLIP	20371350
hsa-mir-663a	MIMAT0003326	HEXA	HITS-CLIP	23824327
hsa-mir-4739	MIMAT0019868	HGS	PAR-CLIP	26701625
hsa-mir-4739	MIMAT0019868	HHIP	PAR-CLIP	23592263|24398324|27292025
hsa-mir-8069	MIMAT0030996	HHLA1	PAR-CLIP	21572407
hsa-mir-4674	MIMAT0019756	HIP1	HITS-CLIP	23824327
hsa-mir-4674	MIMAT0019756	HIST1H1E	PAR-CLIP	23446348
hsa-mir-4497	MIMAT0019032	HIST1H2AH	HITS-CLIP	23824327
hsa-mir-4745-5p	MIMAT0019878	HIST1H2BE	HITS-CLIP//PAR-CLIP	23446348|21572407|20371350|23706177
hsa-mir-4745-5p	MIMAT0019878	HIST1H2BG	PAR-CLIP	22100165|23446348|20371350
hsa-mir-6088	MIMAT0023713	HIST1H2BG	HITS-CLIP	27418678|28735896
hsa-mir-4530	MIMAT0019069	HIST1H2BJ	HITS-CLIP	23313552
hsa-mir-4745-5p	MIMAT0019878	HIST1H2BL	PAR-CLIP	23446348|20371350
hsa-mir-4745-5p	MIMAT0019878	HIST1H2BO	PAR-CLIP	23446348|20371350
hsa-mir-4745-5p	MIMAT0019878	HIST1H3C	PAR-CLIP	23446348
hsa-mir-4689	MIMAT0019778	HIST1H4C	HITS-CLIP	27418678
hsa-mir-4674	MIMAT0019756	HKR1	PAR-CLIP	23592263
hsa-mir-7704	MIMAT0030019	HLA-DOA	PAR-CLIP	23592263
hsa-mir-4689	MIMAT0019778	HLA-DRA	PAR-CLIP	23592263
hsa-mir-4516	MIMAT0019053	HLA-DRB5	HITS-CLIP	19536157
hsa-mir-4739	MIMAT0019868	HMGA1	PAR-CLIP	26701625
hsa-mir-6789-5p	MIMAT0027478	HMGA1	PAR-CLIP	26701625
hsa-mir-4689	MIMAT0019778	HMGB3	PAR-CLIP	23592263|23446348|21572407
hsa-mir-4689	MIMAT0019778	HMGCS1	HITS-CLIP	23824327
hsa-mir-4516	MIMAT0019053	HMGN2	PAR-CLIP	23446348
hsa-mir-4739	MIMAT0019868	HMGXB4	PAR-CLIP	23592263
hsa-mir-4516	MIMAT0019053	HNRNPU	PAR-CLIP	21572407|26701625
hsa-mir-3178	MIMAT0015055	HOOK3	HITS-CLIP//PAR-CLIP	23824327|27292025
hsa-mir-6088	MIMAT0023713	HOOK3	HITS-CLIP	27418678
hsa-mir-8069	MIMAT0030996	HOPX	HITS-CLIP	19536157
hsa-mir-4516	MIMAT0019053	HOXA3	PAR-CLIP	21572407
hsa-mir-6800-5p	MIMAT0027500	HOXA7	PAR-CLIP	26701625
hsa-mir-4739	MIMAT0019868	HOXB13	PAR-CLIP	23592263
hsa-mir-4689	MIMAT0019778	HOXB5	PAR-CLIP	23592263
hsa-mir-4739	MIMAT0019868	HOXB5	PAR-CLIP	23592263
hsa-mir-663a	MIMAT0003326	HOXB8	PAR-CLIP	23592263
hsa-mir-4689	MIMAT0019778	HOXC13	PAR-CLIP	23592263
hsa-mir-4649-5p	MIMAT0019711	HP1BP3	HITS-CLIP	19536157
hsa-mir-4739	MIMAT0019868	HPCAL1	PAR-CLIP	26701625
hsa-mir-663a	MIMAT0003326	HRAS	Luciferase reporter assay//qRT-PCR//Western blot	23953123
hsa-mir-4516	MIMAT0019053	HRK	PAR-CLIP	23592263
hsa-mir-663a	MIMAT0003326	HRNR	HITS-CLIP	19536157
hsa-mir-8069	MIMAT0030996	HRNR	PAR-CLIP	22100165
hsa-mir-4516	MIMAT0019053	HS2ST1	HITS-CLIP	23313552
hsa-mir-4488	MIMAT0019022	HS6ST1	PAR-CLIP	26701625
hsa-mir-1237-5p	MIMAT0022946	HS6ST1	PAR-CLIP	26701625
hsa-mir-4530	MIMAT0019069	HSP90AB1	PAR-CLIP	26701625
hsa-mir-4516	MIMAT0019053	HSP90B1	PAR-CLIP	26701625
hsa-mir-6789-5p	MIMAT0027478	HSP90B1	PAR-CLIP	26701625
hsa-mir-663a	MIMAT0003326	HSPG2	Luciferase reporter assay	23436656
hsa-mir-6088	MIMAT0023713	HYPK	HITS-CLIP	23824327
hsa-mir-4745-5p	MIMAT0019878	IBA57	PAR-CLIP	26701625
hsa-mir-4739	MIMAT0019868	ICOSLG	PAR-CLIP	23592263
hsa-mir-3663-3p	MIMAT0018085	ID3	PAR-CLIP	26701625
hsa-mir-4674	MIMAT0019756	ID4	PAR-CLIP	20371350
hsa-mir-663a	MIMAT0003326	IDE	PAR-CLIP	27292025
hsa-mir-4516	MIMAT0019053	IDH3A	PAR-CLIP	23592263
hsa-mir-4745-5p	MIMAT0019878	IDS	PAR-CLIP	23592263
hsa-mir-4530	MIMAT0019069	IER2	PAR-CLIP	26701625
hsa-mir-4739	MIMAT0019868	IER5	PAR-CLIP	27292025
hsa-mir-6088	MIMAT0023713	IER5	PAR-CLIP	20371350
hsa-mir-4649-5p	MIMAT0019711	IFITM3	PAR-CLIP	26701625|27292025
hsa-mir-7704	MIMAT0030019	IFNAR1	PAR-CLIP	23446348|21572407|20371350
hsa-mir-4649-5p	MIMAT0019711	IFNAR2	PAR-CLIP	21572407
hsa-mir-4739	MIMAT0019868	IFNAR2	HITS-CLIP	23313552
hsa-mir-4516	MIMAT0019053	IFNLR1	PAR-CLIP	26701625
hsa-mir-3663-3p	MIMAT0018085	IFRD1	HITS-CLIP	19536157
hsa-mir-150-3p	MIMAT0004610	IGF1R	Chip//Luciferase assay//Microarray//QRTPCR//Western blot	23675407
hsa-mir-4739	MIMAT0019868	IGFBP4	PAR-CLIP	23592263
hsa-mir-4516	MIMAT0019053	IGFBP5	PAR-CLIP	20371350
hsa-mir-4689	MIMAT0019778	IGFBP5	PAR-CLIP	20371350
hsa-mir-6088	MIMAT0023713	IGFBP5	PAR-CLIP	20371350
hsa-mir-4689	MIMAT0019778	IHH	PAR-CLIP	22100165
hsa-mir-4739	MIMAT0019868	IKBKG	HITS-CLIP	23313552
hsa-mir-6088	MIMAT0023713	IKZF3	HITS-CLIP	23824327
hsa-mir-6088	MIMAT0023713	IL10RB	HITS-CLIP	23824327|27418678
hsa-mir-4689	MIMAT0019778	IL17REL	PAR-CLIP	22012620
hsa-mir-6800-5p	MIMAT0027500	IMPACT	PAR-CLIP	27292025
hsa-mir-4674	MIMAT0019756	INAFM1	PAR-CLIP	26701625
hsa-mir-4739	MIMAT0019868	INAFM1	PAR-CLIP	26701625
hsa-mir-4516	MIMAT0019053	ING4	PAR-CLIP	26701625
hsa-mir-4745-5p	MIMAT0019878	ING4	PAR-CLIP	26701625
hsa-mir-8069	MIMAT0030996	INIP	PAR-CLIP	22012620
hsa-mir-663a	MIMAT0003326	INO80E	PAR-CLIP	23592263
hsa-mir-1237-5p	MIMAT0022946	INO80E	PAR-CLIP	23592263
hsa-mir-150-3p	MIMAT0004610	INTU	PAR-CLIP	23446348|22012620|21572407|20371350
hsa-mir-4739	MIMAT0019868	IP6K1	PAR-CLIP	23592263
hsa-mir-7704	MIMAT0030019	IP6K1	PAR-CLIP	23592263
hsa-mir-4674	MIMAT0019756	IPCEF1	HITS-CLIP	23824327
hsa-mir-4739	MIMAT0019868	IPCEF1	HITS-CLIP	23824327
hsa-mir-6789-5p	MIMAT0027478	IPO7	PAR-CLIP	27292025
hsa-mir-4739	MIMAT0019868	IQSEC2	PAR-CLIP	23592263
hsa-mir-3178	MIMAT0015055	IRAK3	HITS-CLIP	23824327
hsa-mir-4497	MIMAT0019032	IRX5	PAR-CLIP	26701625
hsa-mir-4739	MIMAT0019868	ITGA11	HITS-CLIP//PAR-CLIP	24906430|26701625|27292025|27418678
hsa-mir-150-3p	MIMAT0004610	ITGB3BP	PAR-CLIP	22012620
hsa-mir-4674	MIMAT0019756	ITPKB	HITS-CLIP	19536157
hsa-mir-6800-5p	MIMAT0027500	IVNS1ABP	PAR-CLIP	21572407
hsa-mir-663a	MIMAT0003326	JADE2	PAR-CLIP	23592263
hsa-mir-6088	MIMAT0023713	JAKMIP2	HITS-CLIP	27418678
hsa-mir-3663-3p	MIMAT0018085	JAKMIP3	HITS-CLIP	23824327|19536157
hsa-mir-3178	MIMAT0015055	JUN	PAR-CLIP	22100165
hsa-mir-4739	MIMAT0019868	JUN	PAR-CLIP	22100165
hsa-mir-663a	MIMAT0003326	JUNB	Luciferase reporter assay//Microarray//qRT-PCR//Western blot	20622002|24014830
hsa-mir-3178	MIMAT0015055	JUNB	PAR-CLIP	26701625
hsa-mir-663a	MIMAT0003326	JUND	Luciferase reporter assay//Microarray//PAR-CLIP//qRT-PCR//Western blot	20622002|23592263|20371350|27184257|26701625
hsa-mir-4739	MIMAT0019868	KANK2	PAR-CLIP	26701625
hsa-mir-6088	MIMAT0023713	KAT7	PAR-CLIP	23592263
hsa-mir-4739	MIMAT0019868	KCNA5	PAR-CLIP	23592263
hsa-mir-4516	MIMAT0019053	KCND1	PAR-CLIP	23592263
hsa-mir-7704	MIMAT0030019	KCNH1	PAR-CLIP	23592263|20371350
hsa-mir-4516	MIMAT0019053	KCNH2	PAR-CLIP	26701625
hsa-mir-6088	MIMAT0023713	KCNJ3	HITS-CLIP	27418678
hsa-mir-3196	MIMAT0015080	KCNK3	PAR-CLIP	23592263|26701625
hsa-mir-4516	MIMAT0019053	KCNK5	PAR-CLIP	26701625
hsa-mir-4649-5p	MIMAT0019711	KCNN3	PAR-CLIP	27292025
hsa-mir-3663-3p	MIMAT0018085	KCTD15	PAR-CLIP	23592263|23446348|21572407|20371350
hsa-mir-663a	MIMAT0003326	KDELC2	PAR-CLIP	27292025
hsa-mir-3196	MIMAT0015080	KDELC2	PAR-CLIP	27292025
hsa-mir-4488	MIMAT0019022	KDELC2	PAR-CLIP	27292025
hsa-mir-1237-5p	MIMAT0022946	KDELC2	PAR-CLIP	27292025
hsa-mir-150-3p	MIMAT0004610	KDELR1	HITS-CLIP	23824327
hsa-mir-4516	MIMAT0019053	KDELR1	PAR-CLIP	27292025
hsa-mir-8069	MIMAT0030996	KDELR1	HITS-CLIP	23824327
hsa-mir-4516	MIMAT0019053	KDM5C	PAR-CLIP	23592263
hsa-mir-4689	MIMAT0019778	KDM6A	PAR-CLIP	22100165
hsa-mir-3178	MIMAT0015055	KDM6B	PAR-CLIP	23592263|26701625
hsa-mir-3663-3p	MIMAT0018085	KDM6B	PAR-CLIP	26701625
hsa-mir-4745-5p	MIMAT0019878	KDM6B	PAR-CLIP	20371350|26701625
hsa-mir-7704	MIMAT0030019	KDM6B	PAR-CLIP	20371350
hsa-mir-663a	MIMAT0003326	KHSRP	PAR-CLIP	23592263|20371350
hsa-mir-4739	MIMAT0019868	KHSRP	PAR-CLIP	23592263
hsa-mir-1237-5p	MIMAT0022946	KHSRP	PAR-CLIP	23592263|20371350
hsa-mir-3178	MIMAT0015055	KIAA0754	HITS-CLIP	23824327|23313552
hsa-mir-4530	MIMAT0019069	KIAA0895	PAR-CLIP	22291592
hsa-mir-4745-5p	MIMAT0019878	KIAA0895	PAR-CLIP	22291592
hsa-mir-4745-5p	MIMAT0019878	KIAA0895L	HITS-CLIP//PAR-CLIP	23592263|27418678
hsa-mir-6088	MIMAT0023713	KIAA0930	HITS-CLIP	23824327|27418678
hsa-mir-6800-5p	MIMAT0027500	KIAA1324	PAR-CLIP	27292025
hsa-mir-3178	MIMAT0015055	KIAA1456	HITS-CLIP	23824327
hsa-mir-4516	MIMAT0019053	KIAA1456	PAR-CLIP	23592263
hsa-mir-663a	MIMAT0003326	KIAA1551	HITS-CLIP	23824327
hsa-mir-8069	MIMAT0030996	KIAA1586	HITS-CLIP	19536157
hsa-mir-4516	MIMAT0019053	KIAA1958	HITS-CLIP	19536157
hsa-mir-4530	MIMAT0019069	KIF26B	PAR-CLIP	22012620
hsa-mir-4739	MIMAT0019868	KIF2C	PAR-CLIP	23592263
hsa-mir-4649-5p	MIMAT0019711	KIF5B	PAR-CLIP	27292025
hsa-mir-4530	MIMAT0019069	KIFC1	PAR-CLIP	22012620
hsa-mir-4739	MIMAT0019868	KLF13	PAR-CLIP	23592263
hsa-mir-663a	MIMAT0003326	KLF4	Microarray//qRT-PCR	21378144
hsa-mir-4516	MIMAT0019053	KLF7	PAR-CLIP	22100165
hsa-mir-3663-3p	MIMAT0018085	KLHDC3	PAR-CLIP	23592263
hsa-mir-4689	MIMAT0019778	KLHL11	PAR-CLIP	22100165
hsa-mir-6088	MIMAT0023713	KLK10	PAR-CLIP	23592263
hsa-mir-663a	MIMAT0003326	KLLN	HITS-CLIP	23824327
hsa-mir-6789-5p	MIMAT0027478	KMT2B	PAR-CLIP	26701625
hsa-mir-7704	MIMAT0030019	KMT2B	PAR-CLIP	26701625
hsa-mir-4689	MIMAT0019778	KMT2D	PAR-CLIP	21572407|20371350
hsa-mir-4530	MIMAT0019069	KMT5A	PAR-CLIP	23592263
hsa-mir-4516	MIMAT0019053	KPNA6	PAR-CLIP	20371350
hsa-mir-4689	MIMAT0019778	KRAS	Luciferase reporter assay//Western blot	25756961
hsa-mir-4530	MIMAT0019069	KREMEN1	HITS-CLIP	19536157
hsa-mir-4739	MIMAT0019868	KRT80	PAR-CLIP	23592263|20371350|26701625
hsa-mir-4745-5p	MIMAT0019878	LAMC1	PAR-CLIP	23592263
hsa-mir-4649-5p	MIMAT0019711	LANCL3	HITS-CLIP	24906430
hsa-mir-6789-5p	MIMAT0027478	LARP1	PAR-CLIP	26701625
hsa-mir-4739	MIMAT0019868	LASP1	PAR-CLIP	26701625
hsa-mir-4674	MIMAT0019756	LAX1	HITS-CLIP	23824327
hsa-mir-4689	MIMAT0019778	LCE1A	PAR-CLIP	23592263
hsa-mir-4516	MIMAT0019053	LCE1B	PAR-CLIP	20371350
hsa-mir-4530	MIMAT0019069	LCOR	HITS-CLIP	27418678
hsa-mir-4745-5p	MIMAT0019878	LDB1	PAR-CLIP	23592263
hsa-mir-7704	MIMAT0030019	LDLR	PAR-CLIP	27292025
hsa-mir-4530	MIMAT0019069	LDLRAD4	HITS-CLIP	19536157
hsa-mir-6800-5p	MIMAT0027500	LEFTY1	PAR-CLIP	22012620
hsa-mir-3196	MIMAT0015080	LEPROTL1	HITS-CLIP	23824327
hsa-mir-4739	MIMAT0019868	LETMD1	PAR-CLIP	23592263
hsa-mir-3663-3p	MIMAT0018085	LFNG	PAR-CLIP	23592263
hsa-mir-663a	MIMAT0003326	LHFPL3	PAR-CLIP	23592263
hsa-mir-4497	MIMAT0019032	LHFPL3	PAR-CLIP	23592263
hsa-mir-8069	MIMAT0030996	LHX6	PAR-CLIP	20371350
hsa-mir-6088	MIMAT0023713	LILRB1	HITS-CLIP	27418678
hsa-mir-4516	MIMAT0019053	LIMK1	PAR-CLIP	26701625
hsa-mir-4649-5p	MIMAT0019711	LIN9	HITS-CLIP	23824327|23313552
hsa-mir-6789-5p	MIMAT0027478	LIPG	PAR-CLIP	20371350
hsa-mir-4649-5p	MIMAT0019711	LIX1L	HITS-CLIP	23706177
hsa-mir-4689	MIMAT0019778	LMNB1	PAR-CLIP	20371350
hsa-mir-4674	MIMAT0019756	LMNB2	PAR-CLIP	26701625
hsa-mir-4689	MIMAT0019778	LMNB2	PAR-CLIP	26701625
hsa-mir-4739	MIMAT0019868	LMNB2	PAR-CLIP	26701625
hsa-mir-4745-5p	MIMAT0019878	LMNB2	PAR-CLIP	26701625
hsa-mir-6088	MIMAT0023713	LMNB2	PAR-CLIP	26701625
hsa-mir-8069	MIMAT0030996	LMNB2	PAR-CLIP	26701625
hsa-mir-4530	MIMAT0019069	LMTK2	PAR-CLIP	26701625
hsa-mir-4689	MIMAT0019778	LNPEP	PAR-CLIP	23592263|26701625
hsa-mir-4739	MIMAT0019868	LONRF3	PAR-CLIP	24398324|27292025
hsa-mir-6088	MIMAT0023713	LRAT	HITS-CLIP	23824327|22927820|27418678
hsa-mir-4516	MIMAT0019053	LRIG2	PAR-CLIP	23592263
hsa-mir-4530	MIMAT0019069	LRIG2	PAR-CLIP	24398324
hsa-mir-4745-5p	MIMAT0019878	LRIT3	PAR-CLIP	22100165
hsa-mir-6088	MIMAT0023713	LRIT3	PAR-CLIP	22100165
hsa-mir-4745-5p	MIMAT0019878	LRP3	PAR-CLIP	23592263
hsa-mir-150-3p	MIMAT0004610	LRRC1	PAR-CLIP	20371350
hsa-mir-6088	MIMAT0023713	LRRC2	HITS-CLIP	23824327
hsa-mir-4516	MIMAT0019053	LRRC20	PAR-CLIP	23592263
hsa-mir-4689	MIMAT0019778	LRRC20	PAR-CLIP	23592263
hsa-mir-4497	MIMAT0019032	LRRC27	HITS-CLIP	23824327
hsa-mir-4516	MIMAT0019053	LRRC3C	PAR-CLIP	20371350
hsa-mir-4530	MIMAT0019069	LRRC47	HITS-CLIP	23824327
hsa-mir-4516	MIMAT0019053	LRRC58	PAR-CLIP	20371350
hsa-mir-4739	MIMAT0019868	LRRC59	PAR-CLIP	26701625
hsa-mir-4530	MIMAT0019069	LRTM2	PAR-CLIP	23592263
hsa-mir-4739	MIMAT0019868	LSM2	PAR-CLIP	26701625
hsa-mir-3196	MIMAT0015080	LSP1	PAR-CLIP	26701625
hsa-mir-4488	MIMAT0019022	LSP1	PAR-CLIP	26701625
hsa-mir-1237-5p	MIMAT0022946	LSP1	PAR-CLIP	26701625
hsa-mir-4516	MIMAT0019053	LURAP1L	PAR-CLIP	21572407
hsa-mir-4739	MIMAT0019868	LY6H	PAR-CLIP	20371350|27292025
hsa-mir-4745-5p	MIMAT0019878	LYPLA2	PAR-CLIP	23592263|26701625
hsa-mir-3196	MIMAT0015080	LYRM4	HITS-CLIP	23824327
hsa-mir-4488	MIMAT0019022	LYRM4	HITS-CLIP	23824327
hsa-mir-1237-5p	MIMAT0022946	LYRM4	HITS-CLIP	23824327
hsa-mir-4649-5p	MIMAT0019711	LYZ	HITS-CLIP	23313552
hsa-mir-4516	MIMAT0019053	LZIC	PAR-CLIP	27292025
hsa-mir-4516	MIMAT0019053	M6PR	HITS-CLIP//PAR-CLIP	23592263|23446348|21572407|20371350
hsa-mir-150-3p	MIMAT0004610	MACC1	HITS-CLIP	23824327|28735896
hsa-mir-4516	MIMAT0019053	MAF	PAR-CLIP	21572407
hsa-mir-663a	MIMAT0003326	MAFK	PAR-CLIP	26701625
hsa-mir-4739	MIMAT0019868	MAG	PAR-CLIP	24398324
hsa-mir-6088	MIMAT0023713	MAGT1	HITS-CLIP	27418678
hsa-mir-3178	MIMAT0015055	MALL	HITS-CLIP	23824327
hsa-mir-4745-5p	MIMAT0019878	MALL	PAR-CLIP	26701625
hsa-mir-3663-3p	MIMAT0018085	MAN1C1	HITS-CLIP	23824327|27418678
hsa-mir-4488	MIMAT0019022	MAP1S	PAR-CLIP	26701625
hsa-mir-4745-5p	MIMAT0019878	MAP1S	PAR-CLIP	26701625
hsa-mir-1237-5p	MIMAT0022946	MAP1S	PAR-CLIP	26701625
hsa-mir-4516	MIMAT0019053	MAP2	HITS-CLIP	27418678
hsa-mir-4745-5p	MIMAT0019878	MAP2K3	PAR-CLIP	26701625
hsa-mir-3178	MIMAT0015055	MAP2K7	PAR-CLIP	26701625
hsa-mir-4739	MIMAT0019868	MAP2K7	PAR-CLIP	26701625
hsa-mir-4516	MIMAT0019053	MAP7D1	PAR-CLIP	23446348|21572407
hsa-mir-4689	MIMAT0019778	MAPK1	PAR-CLIP	23592263
hsa-mir-6088	MIMAT0023713	MAPK1	PAR-CLIP	23446348|21572407
hsa-mir-4516	MIMAT0019053	MAPK13	PAR-CLIP	23592263
hsa-mir-3196	MIMAT0015080	MAPK8IP2	HITS-CLIP	19536157
hsa-mir-4488	MIMAT0019022	MAPK8IP2	HITS-CLIP	19536157
hsa-mir-1237-5p	MIMAT0022946	MAPK8IP2	HITS-CLIP	19536157
hsa-mir-3196	MIMAT0015080	MAPK8IP3	PAR-CLIP	24398324|20371350|26701625
hsa-mir-3196	MIMAT0015080	MAPKAPK2	PAR-CLIP	26701625
hsa-mir-4516	MIMAT0019053	MARCH1	PAR-CLIP	22012620
hsa-mir-663a	MIMAT0003326	MARVELD1	PAR-CLIP	20371350
hsa-mir-3196	MIMAT0015080	MARVELD1	PAR-CLIP	20371350
hsa-mir-3178	MIMAT0015055	MAST3	HITS-CLIP	23824327
hsa-mir-4739	MIMAT0019868	MAT1A	PAR-CLIP	23592263|26701625
hsa-mir-4739	MIMAT0019868	MAT2A	PAR-CLIP	23592263
hsa-mir-7704	MIMAT0030019	MAZ	HITS-CLIP	19536157
hsa-mir-4516	MIMAT0019053	MBD4	PAR-CLIP	23592263|24398324|20371350
hsa-mir-4530	MIMAT0019069	MBD4	PAR-CLIP	21572407
hsa-mir-8069	MIMAT0030996	MBNL3	HITS-CLIP//PAR-CLIP	23446348|21572407|20371350
hsa-mir-3178	MIMAT0015055	MBOAT1	HITS-CLIP	23824327|23313552
hsa-mir-1469	MIMAT0007347	MCL1	HITS-CLIP//PAR-CLIP	23592263|19536157
hsa-mir-4649-5p	MIMAT0019711	MCM5	PAR-CLIP	26701625
hsa-mir-6088	MIMAT0023713	MCOLN2	HITS-CLIP	27418678
hsa-mir-6789-5p	MIMAT0027478	MDK	PAR-CLIP	27292025
hsa-mir-4649-5p	MIMAT0019711	MDM2	HITS-CLIP	23706177
hsa-mir-3178	MIMAT0015055	MDM4	HITS-CLIP	23824327
hsa-mir-4516	MIMAT0019053	MECP2	PAR-CLIP	23446348|22012620|26701625|27292025
hsa-mir-4745-5p	MIMAT0019878	MECP2	PAR-CLIP	26701625
hsa-mir-3178	MIMAT0015055	MED28	HITS-CLIP	23824327
hsa-mir-4739	MIMAT0019868	MEF2D	PAR-CLIP	26701625
hsa-mir-6789-5p	MIMAT0027478	MEF2D	PAR-CLIP	23708386|22291592
hsa-mir-7704	MIMAT0030019	MEF2D	PAR-CLIP	26701625
hsa-mir-4745-5p	MIMAT0019878	MEIS3P1	PAR-CLIP	23592263
hsa-mir-3196	MIMAT0015080	MELTF	PAR-CLIP	23592263
hsa-mir-4488	MIMAT0019022	MEN1	PAR-CLIP	23592263|26701625
hsa-mir-4674	MIMAT0019756	MEN1	PAR-CLIP	23592263|26701625
hsa-mir-1237-5p	MIMAT0022946	MEN1	PAR-CLIP	23592263|26701625
hsa-mir-6088	MIMAT0023713	METAP1	HITS-CLIP	27418678
hsa-mir-4689	MIMAT0019778	METTL12	PAR-CLIP	22100165
hsa-mir-4689	MIMAT0019778	METTL21A	PAR-CLIP	20371350
hsa-mir-4674	MIMAT0019756	METTL27	HITS-CLIP	23824327
hsa-mir-4674	MIMAT0019756	MGST3	HITS-CLIP	23824327
hsa-mir-4488	MIMAT0019022	MIB2	PAR-CLIP	23592263
hsa-mir-1237-5p	MIMAT0022946	MIB2	PAR-CLIP	23592263
hsa-mir-663a	MIMAT0003326	MICAL2	PAR-CLIP	27292025
hsa-mir-4530	MIMAT0019069	MID1	PAR-CLIP	22012620|26701625|27292025
hsa-mir-3196	MIMAT0015080	MIDN	PAR-CLIP	23592263|26701625
hsa-mir-4488	MIMAT0019022	MIDN	PAR-CLIP	23592263|26701625
hsa-mir-4649-5p	MIMAT0019711	MIDN	PAR-CLIP	27292025
hsa-mir-4739	MIMAT0019868	MIDN	HITS-CLIP	23313552
hsa-mir-4745-5p	MIMAT0019878	MIDN	PAR-CLIP	26701625
hsa-mir-1237-5p	MIMAT0022946	MIDN	PAR-CLIP	23592263|26701625
hsa-mir-4530	MIMAT0019069	MIER1	PAR-CLIP	22012620
hsa-mir-4745-5p	MIMAT0019878	MIER3	HITS-CLIP	23313552
hsa-mir-6088	MIMAT0023713	MIER3	HITS-CLIP	23313552
hsa-mir-3196	MIMAT0015080	MINK1	PAR-CLIP	23592263|20371350
hsa-mir-4739	MIMAT0019868	MINK1	PAR-CLIP	23592263
hsa-mir-4516	MIMAT0019053	MINOS1	HITS-CLIP	23313552
hsa-mir-4739	MIMAT0019868	MINOS1-NBL1	PAR-CLIP	26701625
hsa-mir-4497	MIMAT0019032	MIPOL1	HITS-CLIP	23824327
hsa-mir-150-3p	MIMAT0004610	MKNK2	PAR-CLIP	23592263|22012620|20371350
hsa-mir-4739	MIMAT0019868	MLLT1	HITS-CLIP	23313552
hsa-mir-4745-5p	MIMAT0019878	MLLT1	PAR-CLIP	23592263
hsa-mir-150-3p	MIMAT0004610	MLXIP	PAR-CLIP	27292025
hsa-mir-4689	MIMAT0019778	MLXIP	PAR-CLIP	23592263|26701625
hsa-mir-4739	MIMAT0019868	MLXIP	PAR-CLIP	23592263|26701625
hsa-mir-663a	MIMAT0003326	MNT	PAR-CLIP	27292025
hsa-mir-4516	MIMAT0019053	MNT	PAR-CLIP	27292025
hsa-mir-4530	MIMAT0019069	MNX1	PAR-CLIP	23446348|20371350
hsa-mir-8069	MIMAT0030996	MOB3A	PAR-CLIP	26701625
hsa-mir-8069	MIMAT0030996	MOCS3	PAR-CLIP	20371350
hsa-mir-4739	MIMAT0019868	MORC4	HITS-CLIP//PAR-CLIP	23824327|27292025|27418678
hsa-mir-3178	MIMAT0015055	MPIG6B	HITS-CLIP	23824327
hsa-mir-4530	MIMAT0019069	MPRIP	HITS-CLIP	23824327
hsa-mir-4745-5p	MIMAT0019878	MRE11	PAR-CLIP	24398324|22012620|20371350|27292025
hsa-mir-4649-5p	MIMAT0019711	MRM3	PAR-CLIP	27292025
hsa-mir-4488	MIMAT0019022	MRNIP	HITS-CLIP	28735896
hsa-mir-1237-5p	MIMAT0022946	MRNIP	HITS-CLIP	28735896
hsa-mir-663a	MIMAT0003326	MRPL44	PAR-CLIP	26701625
hsa-mir-3196	MIMAT0015080	MRPL44	PAR-CLIP	26701625
hsa-mir-4488	MIMAT0019022	MRPL44	PAR-CLIP	26701625
hsa-mir-1237-5p	MIMAT0022946	MRPL44	PAR-CLIP	26701625
hsa-mir-4530	MIMAT0019069	MRPL45	HITS-CLIP	19536157
hsa-mir-4649-5p	MIMAT0019711	MRPS10	PAR-CLIP	21572407
hsa-mir-4745-5p	MIMAT0019878	MRPS18A	PAR-CLIP	26701625
hsa-mir-150-3p	MIMAT0004610	MRPS25	PAR-CLIP	22291592
hsa-mir-4649-5p	MIMAT0019711	MRPS27	PAR-CLIP	23592263
hsa-mir-4739	MIMAT0019868	MRRF	PAR-CLIP	27292025
hsa-mir-150-3p	MIMAT0004610	MRS2	PAR-CLIP	22012620
hsa-mir-4689	MIMAT0019778	MRVI1	PAR-CLIP	23592263|23446348|22012620|20371350|26701625|27292025
hsa-mir-3196	MIMAT0015080	MSC	PAR-CLIP	23592263
hsa-mir-4745-5p	MIMAT0019878	MSC	PAR-CLIP	23592263|27292025
hsa-mir-3196	MIMAT0015080	MSI1	PAR-CLIP	24398324
hsa-mir-4488	MIMAT0019022	MSI1	PAR-CLIP	23592263|24398324
hsa-mir-1237-5p	MIMAT0022946	MSI1	PAR-CLIP	23592263|24398324
hsa-mir-4488	MIMAT0019022	MSN	PAR-CLIP	23592263
hsa-mir-4530	MIMAT0019069	MSN	PAR-CLIP	26701625
hsa-mir-4739	MIMAT0019868	MSN	PAR-CLIP	26701625
hsa-mir-1237-5p	MIMAT0022946	MSN	PAR-CLIP	23592263
hsa-mir-6800-5p	MIMAT0027500	MSN	PAR-CLIP	26701625
hsa-mir-3196	MIMAT0015080	MTA1	PAR-CLIP	26701625
hsa-mir-6088	MIMAT0023713	MTA3	HITS-CLIP	27418678
hsa-mir-6789-5p	MIMAT0027478	MTA3	PAR-CLIP	22012620
hsa-mir-6789-5p	MIMAT0027478	MTG2	HITS-CLIP	23824327
hsa-mir-4649-5p	MIMAT0019711	MTHFD1	PAR-CLIP	27292025
hsa-mir-4516	MIMAT0019053	MTHFSD	PAR-CLIP	23592263
hsa-mir-4516	MIMAT0019053	MTMR1	PAR-CLIP	22012620
hsa-mir-4497	MIMAT0019032	MTPAP	PAR-CLIP	26701625
hsa-mir-663a	MIMAT0003326	MTSS1L	PAR-CLIP	26701625
hsa-mir-4649-5p	MIMAT0019711	MTURN	PAR-CLIP	27292025
hsa-mir-4530	MIMAT0019069	MVK	HITS-CLIP	19536157
hsa-mir-4739	MIMAT0019868	MXRA7	PAR-CLIP	23592263
hsa-mir-663a	MIMAT0003326	MYADM	PAR-CLIP	23592263
hsa-mir-150-3p	MIMAT0004610	MYB	Flow//Luciferase reporter assay//Microarray//qRT-PCR//Western blot	22025269
hsa-mir-6088	MIMAT0023713	MYCBP	HITS-CLIP	23824327
hsa-mir-6800-5p	MIMAT0027500	MYCBP	PAR-CLIP	23592263|21572407
hsa-mir-4488	MIMAT0019022	MYH11	PAR-CLIP	23592263
hsa-mir-4745-5p	MIMAT0019878	MYH11	PAR-CLIP	23592263
hsa-mir-1237-5p	MIMAT0022946	MYH11	PAR-CLIP	23592263
hsa-mir-4739	MIMAT0019868	MYH14	HITS-CLIP//PAR-CLIP	23592263|24398324|22012620|23706177|26701625|27292025
hsa-mir-4745-5p	MIMAT0019878	MYH9	PAR-CLIP	26701625
hsa-mir-4516	MIMAT0019053	MYL12A	PAR-CLIP	23592263
hsa-mir-663a	MIMAT0003326	MYL9	Luciferase reporter assay//qRT-PCR//Western blot	24014830
hsa-mir-4530	MIMAT0019069	MYLK4	HITS-CLIP	23824327
hsa-mir-3196	MIMAT0015080	MYOD1	Luciferase reporter assay//qRT-PCR//Western blot	27780918
hsa-mir-6088	MIMAT0023713	MYPN	HITS-CLIP//PAR-CLIP	23706177|26701625
hsa-mir-6789-5p	MIMAT0027478	NAA50	PAR-CLIP	23592263
hsa-mir-4497	MIMAT0019032	NAB2	PAR-CLIP	26701625
hsa-mir-4516	MIMAT0019053	NAB2	PAR-CLIP	26701625
hsa-mir-663a	MIMAT0003326	NACC1	PAR-CLIP	23592263|26701625
hsa-mir-3196	MIMAT0015080	NACC1	PAR-CLIP	26701625
hsa-mir-4488	MIMAT0019022	NACC1	PAR-CLIP	23592263
hsa-mir-4739	MIMAT0019868	NACC1	PAR-CLIP	23592263|26701625|27292025
hsa-mir-1237-5p	MIMAT0022946	NACC1	PAR-CLIP	23592263
hsa-mir-4488	MIMAT0019022	NACC2	PAR-CLIP	26701625
hsa-mir-4739	MIMAT0019868	NACC2	PAR-CLIP	26701625
hsa-mir-1237-5p	MIMAT0022946	NACC2	PAR-CLIP	26701625
hsa-mir-3196	MIMAT0015080	NANOS1	PAR-CLIP	23592263
hsa-mir-6088	MIMAT0023713	NAPEPLD	PAR-CLIP	22100165
hsa-mir-4516	MIMAT0019053	NAT9	PAR-CLIP	23592263
hsa-mir-663a	MIMAT0003326	NAV2	Microarray//qRT-PCR	21378144
hsa-mir-4739	MIMAT0019868	NAV2	PAR-CLIP	23592263
hsa-mir-4739	MIMAT0019868	NBL1	PAR-CLIP	26701625
hsa-mir-4739	MIMAT0019868	NBPF11	PAR-CLIP	27292025
hsa-mir-4530	MIMAT0019069	NCAN	HITS-CLIP	19536157
hsa-mir-4516	MIMAT0019053	NCAPH	PAR-CLIP	20371350
hsa-mir-4745-5p	MIMAT0019878	NCBP3	PAR-CLIP	23592263
hsa-mir-6088	MIMAT0023713	NCKAP1	PAR-CLIP	23592263
hsa-mir-4488	MIMAT0019022	NCKAP5L	PAR-CLIP	26701625
hsa-mir-1237-5p	MIMAT0022946	NCKAP5L	PAR-CLIP	26701625
hsa-mir-4689	MIMAT0019778	NCOA3	PAR-CLIP	24398324|26701625
hsa-mir-3178	MIMAT0015055	NCOR2	PAR-CLIP	23592263
hsa-mir-4530	MIMAT0019069	NCOR2	PAR-CLIP	26701625
hsa-mir-4739	MIMAT0019868	NCOR2	PAR-CLIP	23592263
hsa-mir-4530	MIMAT0019069	NCS1	PAR-CLIP	23592263
hsa-mir-3196	MIMAT0015080	NDE1	CLASH	23622248
hsa-mir-4488	MIMAT0019022	NDRG1	PAR-CLIP	26701625
hsa-mir-1237-5p	MIMAT0022946	NDRG1	PAR-CLIP	26701625
hsa-mir-4739	MIMAT0019868	NEK4	HITS-CLIP	23313552
hsa-mir-663a	MIMAT0003326	NEUROD2	HITS-CLIP//PAR-CLIP	23592263|19536157
hsa-mir-3196	MIMAT0015080	NEUROD2	PAR-CLIP	23592263
hsa-mir-4488	MIMAT0019022	NEUROD2	PAR-CLIP	23592263
hsa-mir-1237-5p	MIMAT0022946	NEUROD2	PAR-CLIP	23592263
hsa-mir-4488	MIMAT0019022	NF2	PAR-CLIP	26701625
hsa-mir-4497	MIMAT0019032	NF2	PAR-CLIP	23592263
hsa-mir-4516	MIMAT0019053	NF2	PAR-CLIP	27292025
hsa-mir-4649-5p	MIMAT0019711	NF2	HITS-CLIP	23706177
hsa-mir-4739	MIMAT0019868	NFAT5	PAR-CLIP	23592263
hsa-mir-4516	MIMAT0019053	NFIC	PAR-CLIP	26701625
hsa-mir-4649-5p	MIMAT0019711	NFIC	PAR-CLIP	26701625
hsa-mir-4745-5p	MIMAT0019878	NFIC	PAR-CLIP	26701625
hsa-mir-6088	MIMAT0023713	NFIC	PAR-CLIP	23592263
hsa-mir-4488	MIMAT0019022	NFIX	PAR-CLIP	23592263
hsa-mir-4739	MIMAT0019868	NFIX	PAR-CLIP	23592263
hsa-mir-1237-5p	MIMAT0022946	NFIX	PAR-CLIP	23592263
hsa-mir-6088	MIMAT0023713	NFYB	PAR-CLIP	21572407
hsa-mir-4739	MIMAT0019868	NGFR	PAR-CLIP	23592263
hsa-mir-3178	MIMAT0015055	NICN1	HITS-CLIP	23824327
hsa-mir-4516	MIMAT0019053	NID1	PAR-CLIP	23592263
hsa-mir-4745-5p	MIMAT0019878	NIPA2	PAR-CLIP	26701625
hsa-mir-4516	MIMAT0019053	NKIRAS2	PAR-CLIP	21572407
hsa-mir-663a	MIMAT0003326	NKRF	HITS-CLIP	23313552
hsa-mir-4739	MIMAT0019868	NKRF	HITS-CLIP	23824327
hsa-mir-663a	MIMAT0003326	NKX2-5	PAR-CLIP	22291592
hsa-mir-4516	MIMAT0019053	NLGN2	PAR-CLIP	26701625
hsa-mir-4689	MIMAT0019778	NLGN2	PAR-CLIP	26701625
hsa-mir-7704	MIMAT0030019	NLGN2	PAR-CLIP	26701625
hsa-mir-6800-5p	MIMAT0027500	NLK	HITS-CLIP	23313552
hsa-mir-4530	MIMAT0019069	NLRP12	HITS-CLIP	23824327|19536157
hsa-mir-4530	MIMAT0019069	NLRP9	PAR-CLIP	27292025
hsa-mir-4649-5p	MIMAT0019711	NLRP9	HITS-CLIP	23313552
hsa-mir-4649-5p	MIMAT0019711	NME1-NME2	PAR-CLIP	27292025
hsa-mir-7704	MIMAT0030019	NMNAT1	HITS-CLIP	23824327
hsa-mir-4689	MIMAT0019778	NMNAT2	HITS-CLIP	23824327
hsa-mir-4739	MIMAT0019868	NOL10	PAR-CLIP	23592263
hsa-mir-3178	MIMAT0015055	NOL9	HITS-CLIP	23824327
hsa-mir-6088	MIMAT0023713	NOS1	HITS-CLIP	27418678
hsa-mir-4488	MIMAT0019022	NPBWR1	HITS-CLIP	19536157
hsa-mir-1237-5p	MIMAT0022946	NPBWR1	HITS-CLIP	19536157
hsa-mir-4745-5p	MIMAT0019878	NPLOC4	PAR-CLIP	26701625
hsa-mir-6088	MIMAT0023713	NPR1	HITS-CLIP	23824327
hsa-mir-4674	MIMAT0019756	NPTX1	HITS-CLIP	23824327
hsa-mir-4745-5p	MIMAT0019878	NPTXR	PAR-CLIP	26701625
hsa-mir-4689	MIMAT0019778	NPVF	HITS-CLIP	19536157
hsa-mir-663a	MIMAT0003326	NPW	PAR-CLIP	26701625
hsa-mir-4497	MIMAT0019032	NPY4R	PAR-CLIP	23592263
hsa-mir-4739	MIMAT0019868	NR1H2	PAR-CLIP	26701625|27292025
hsa-mir-4739	MIMAT0019868	NRF1	PAR-CLIP	23446348
hsa-mir-4739	MIMAT0019868	NRG4	PAR-CLIP	23592263
hsa-mir-663a	MIMAT0003326	NRGN	PAR-CLIP	23592263|26701625
hsa-mir-3196	MIMAT0015080	NRGN	PAR-CLIP	23592263
hsa-mir-1237-5p	MIMAT0022946	NRGN	PAR-CLIP	23592263
hsa-mir-4745-5p	MIMAT0019878	NSD1	PAR-CLIP	24398324
hsa-mir-4516	MIMAT0019053	NSL1	HITS-CLIP	27418678
hsa-mir-4674	MIMAT0019756	NTMT1	PAR-CLIP	27292025
hsa-mir-4739	MIMAT0019868	NTN1	PAR-CLIP	23592263
hsa-mir-4739	MIMAT0019868	NTSR1	PAR-CLIP	26701625
hsa-mir-7704	MIMAT0030019	NTSR1	PAR-CLIP	26701625
hsa-mir-6088	MIMAT0023713	NUBPL	HITS-CLIP	23824327
hsa-mir-6088	MIMAT0023713	NUCB1	HITS-CLIP	27418678
hsa-mir-4516	MIMAT0019053	NUDCD2	PAR-CLIP	27292025
hsa-mir-6088	MIMAT0023713	NUDT3	HITS-CLIP	23824327
hsa-mir-4516	MIMAT0019053	NUFIP2	PAR-CLIP	23592263|20371350
hsa-mir-4739	MIMAT0019868	NUFIP2	PAR-CLIP	23592263
hsa-mir-6800-5p	MIMAT0027500	NUP62	PAR-CLIP	26701625
hsa-mir-4649-5p	MIMAT0019711	NUPL2	HITS-CLIP//PAR-CLIP	23824327|27292025
hsa-mir-7704	MIMAT0030019	NUPL2	HITS-CLIP	19536157
hsa-mir-4516	MIMAT0019053	NXN	PAR-CLIP	23592263|20371350
hsa-mir-6088	MIMAT0023713	OAS3	HITS-CLIP	23824327|27418678|28735896
hsa-mir-6088	MIMAT0023713	OAZ1	PAR-CLIP	26701625
hsa-mir-4516	MIMAT0019053	OCLN	PAR-CLIP	27292025
hsa-mir-4739	MIMAT0019868	OGDH	PAR-CLIP	26701625|27292025
hsa-mir-4649-5p	MIMAT0019711	OLFML2A	HITS-CLIP	23824327
hsa-mir-4739	MIMAT0019868	OLFML2A	HITS-CLIP	23824327
hsa-mir-3196	MIMAT0015080	OLR1	HITS-CLIP	23824327
hsa-mir-4488	MIMAT0019022	ONECUT3	PAR-CLIP	20371350
hsa-mir-1237-5p	MIMAT0022946	ONECUT3	PAR-CLIP	20371350
hsa-mir-6088	MIMAT0023713	OR7D2	PAR-CLIP	23446348
hsa-mir-150-3p	MIMAT0004610	ORAI2	PAR-CLIP	27292025
hsa-mir-3178	MIMAT0015055	ORAI2	PAR-CLIP	23446348
hsa-mir-6088	MIMAT0023713	ORAI2	HITS-CLIP	21572407
hsa-mir-8069	MIMAT0030996	ORAI2	PAR-CLIP	23446348
hsa-mir-4649-5p	MIMAT0019711	ORC1	HITS-CLIP//PAR-CLIP	21572407|23313552
hsa-mir-4516	MIMAT0019053	ORC4	PAR-CLIP	21572407
hsa-mir-4530	MIMAT0019069	ORC4	PAR-CLIP	22012620
hsa-mir-4649-5p	MIMAT0019711	ORC6	PAR-CLIP	27292025
hsa-mir-6088	MIMAT0023713	OSTF1	HITS-CLIP	27418678
hsa-mir-663a	MIMAT0003326	OTUB1	PAR-CLIP	23592263
hsa-mir-3196	MIMAT0015080	OTUB1	PAR-CLIP	23592263
hsa-mir-4516	MIMAT0019053	OTUD7B	PAR-CLIP	21572407|20371350
hsa-mir-4739	MIMAT0019868	OTUD7B	PAR-CLIP	20371350
hsa-mir-4689	MIMAT0019778	OXR1	PAR-CLIP	23592263
hsa-mir-4516	MIMAT0019053	P2RY10	PAR-CLIP	27292025
hsa-mir-4516	MIMAT0019053	PABPN1	PAR-CLIP	26701625
hsa-mir-663a	MIMAT0003326	PACSIN1	PAR-CLIP	23592263
hsa-mir-4649-5p	MIMAT0019711	PAICS	PAR-CLIP	21572407
hsa-mir-4516	MIMAT0019053	PALD1	PAR-CLIP	26701625
hsa-mir-6088	MIMAT0023713	PAPPA	PAR-CLIP	22100165
hsa-mir-4739	MIMAT0019868	PARP11	PAR-CLIP	23592263
hsa-mir-4530	MIMAT0019069	PARS2	PAR-CLIP	23592263
hsa-mir-4488	MIMAT0019022	PAX2	PAR-CLIP	23592263
hsa-mir-4649-5p	MIMAT0019711	PAX2	PAR-CLIP	23592263
hsa-mir-4739	MIMAT0019868	PAX2	PAR-CLIP	23592263
hsa-mir-1237-5p	MIMAT0022946	PAX2	PAR-CLIP	23592263
hsa-mir-4739	MIMAT0019868	PAX5	PAR-CLIP	23592263
hsa-mir-663a	MIMAT0003326	PBX2	PAR-CLIP	26701625
hsa-mir-3196	MIMAT0015080	PBX2	PAR-CLIP	26701625
hsa-mir-3663-3p	MIMAT0018085	PCBD2	PAR-CLIP	23592263
hsa-mir-4649-5p	MIMAT0019711	PCBD2	PAR-CLIP	27292025
hsa-mir-4530	MIMAT0019069	PCDH7	HITS-CLIP	21572407
hsa-mir-3196	MIMAT0015080	PCDHB2	HITS-CLIP	23824327
hsa-mir-4488	MIMAT0019022	PCDHB2	HITS-CLIP	23824327
hsa-mir-1237-5p	MIMAT0022946	PCDHB2	HITS-CLIP	23824327
hsa-mir-663a	MIMAT0003326	PCGF3	PAR-CLIP	24398324|23446348|20371350|26701625|27292025
hsa-mir-3196	MIMAT0015080	PCGF3	PAR-CLIP	24398324|23446348|20371350|26701625|27292025
hsa-mir-663a	MIMAT0003326	PCSK4	PAR-CLIP	23592263
hsa-mir-4739	MIMAT0019868	PCYT1A	PAR-CLIP	23592263
hsa-mir-4689	MIMAT0019778	PDE3A	PAR-CLIP	22100165
hsa-mir-4649-5p	MIMAT0019711	PDE4A	PAR-CLIP	23592263|20371350
hsa-mir-663a	MIMAT0003326	PDE4C	PAR-CLIP	22291592|20371350
hsa-mir-4516	MIMAT0019053	PDE4DIP	PAR-CLIP	23592263
hsa-mir-4649-5p	MIMAT0019711	PDF	PAR-CLIP	27292025
hsa-mir-6088	MIMAT0023713	PDGFB	PAR-CLIP	27292025
hsa-mir-4689	MIMAT0019778	PDLIM5	PAR-CLIP	26701625
hsa-mir-4739	MIMAT0019868	PDPR	PAR-CLIP	23592263
hsa-mir-663a	MIMAT0003326	PDRG1	PAR-CLIP	23446348
hsa-mir-663a	MIMAT0003326	PDZD4	PAR-CLIP	23592263
hsa-mir-3178	MIMAT0015055	PEAK3	HITS-CLIP	23824327
hsa-mir-4689	MIMAT0019778	PEG10	PAR-CLIP	23592263
hsa-mir-4739	MIMAT0019868	PEX11B	PAR-CLIP	21572407
hsa-mir-663a	MIMAT0003326	PEX26	PAR-CLIP	26701625
hsa-mir-4745-5p	MIMAT0019878	PEX26	PAR-CLIP	26701625
hsa-mir-4530	MIMAT0019069	PFAS	PAR-CLIP	23592263
hsa-mir-4745-5p	MIMAT0019878	PFKFB2	PAR-CLIP	23592263
hsa-mir-4739	MIMAT0019868	PGAM1	PAR-CLIP	26701625
hsa-mir-4530	MIMAT0019069	PGAM4	PAR-CLIP	26701625
hsa-mir-4739	MIMAT0019868	PGAM4	PAR-CLIP	23592263|26701625
hsa-mir-4739	MIMAT0019868	PGAM5	PAR-CLIP	26701625
hsa-mir-663a	MIMAT0003326	PGAP1	PAR-CLIP	27292025
hsa-mir-6088	MIMAT0023713	PGLS	PAR-CLIP	22100165
hsa-mir-4516	MIMAT0019053	PGM2L1	HITS-CLIP	19536157
hsa-mir-4689	MIMAT0019778	PGRMC2	PAR-CLIP	22100165
hsa-mir-3196	MIMAT0015080	PHACTR4	PAR-CLIP	26701625
hsa-mir-150-3p	MIMAT0004610	PHAX	PAR-CLIP	23446348
hsa-mir-4674	MIMAT0019756	PHAX	HITS-CLIP	23824327
hsa-mir-6088	MIMAT0023713	PHAX	PAR-CLIP	23446348|20371350
hsa-mir-4739	MIMAT0019868	PHB2	PAR-CLIP	23592263|27292025
hsa-mir-4745-5p	MIMAT0019878	PHB2	PAR-CLIP	22012620|20371350
hsa-mir-4516	MIMAT0019053	PHC2	PAR-CLIP	26701625
hsa-mir-4530	MIMAT0019069	PHF3	HITS-CLIP	23824327
hsa-mir-663a	MIMAT0003326	PIAS4	HITS-CLIP	19536157
hsa-mir-4689	MIMAT0019778	PIGP	PAR-CLIP	20371350
hsa-mir-4649-5p	MIMAT0019711	PIGR	PAR-CLIP	21572407
hsa-mir-663a	MIMAT0003326	PIK3CD	Immunohistochemistry//Luciferase reporter assay//Microarray//qRT-PCR//Western blot	24523440
hsa-mir-4516	MIMAT0019053	PIM1	PAR-CLIP	23446348
hsa-mir-4516	MIMAT0019053	PIM2	PAR-CLIP	23592263
hsa-mir-4739	MIMAT0019868	PITPNM3	PAR-CLIP	23592263
hsa-mir-3196	MIMAT0015080	PITX3	PAR-CLIP	23446348
hsa-mir-6789-5p	MIMAT0027478	PKD1	HITS-CLIP	22927820
hsa-mir-4745-5p	MIMAT0019878	PKM	PAR-CLIP	26701625
hsa-mir-4745-5p	MIMAT0019878	PLAC8	HITS-CLIP	23313552
hsa-mir-4739	MIMAT0019868	PLAGL2	PAR-CLIP	27292025
hsa-mir-6088	MIMAT0023713	PLCD3	PAR-CLIP	26701625
hsa-mir-4689	MIMAT0019778	PLD3	PAR-CLIP	26701625
hsa-mir-6088	MIMAT0023713	PLEKHA1	HITS-CLIP	23824327
hsa-mir-4649-5p	MIMAT0019711	PLEKHA3	PAR-CLIP	21572407
hsa-mir-7704	MIMAT0030019	PLEKHM1	PAR-CLIP	26701625
hsa-mir-6088	MIMAT0023713	PLEKHM3	PAR-CLIP	23592263
hsa-mir-4674	MIMAT0019756	PLIN5	PAR-CLIP	21572407
hsa-mir-4689	MIMAT0019778	PLK1	PAR-CLIP	26701625
hsa-mir-663a	MIMAT0003326	PLOD3	Immunofluorescence//Luciferase reporter assay//Microarray//qRT-PCR//Western blot	27233793
hsa-mir-4689	MIMAT0019778	PLSCR1	HITS-CLIP	27418678
hsa-mir-4739	MIMAT0019868	PLXNA1	PAR-CLIP	26701625
hsa-mir-4516	MIMAT0019053	PLXNA2	PAR-CLIP	22100165
hsa-mir-4649-5p	MIMAT0019711	PLXNA3	HITS-CLIP	27418678
hsa-mir-4745-5p	MIMAT0019878	PNMA2	HITS-CLIP	23313552
hsa-mir-4739	MIMAT0019868	PNPLA6	PAR-CLIP	23592263
hsa-mir-6088	MIMAT0023713	PNPO	HITS-CLIP	19536157
hsa-mir-4674	MIMAT0019756	PNRC2	PAR-CLIP	21572407
hsa-mir-4739	MIMAT0019868	POFUT1	PAR-CLIP	22291592
hsa-mir-663a	MIMAT0003326	POFUT2	PAR-CLIP	23592263
hsa-mir-4745-5p	MIMAT0019878	POLD3	PAR-CLIP	23592263
hsa-mir-4739	MIMAT0019868	POLE3	PAR-CLIP	26701625
hsa-mir-8069	MIMAT0030996	POLE3	PAR-CLIP	26701625
hsa-mir-7704	MIMAT0030019	POLR2E	PAR-CLIP	26701625
hsa-mir-4488	MIMAT0019022	POLR2F	PAR-CLIP	26701625
hsa-mir-4739	MIMAT0019868	POLR2F	PAR-CLIP	23446348|22012620|26701625
hsa-mir-1237-5p	MIMAT0022946	POLR2F	PAR-CLIP	26701625
hsa-mir-4739	MIMAT0019868	POLR2J3	PAR-CLIP	23592263
hsa-mir-6088	MIMAT0023713	POLR3A	HITS-CLIP	27418678
hsa-mir-4649-5p	MIMAT0019711	POLR3K	PAR-CLIP	21572407|27292025
hsa-mir-4516	MIMAT0019053	POTED	PAR-CLIP	23592263|24398324|23446348|22012620|21572407
hsa-mir-663a	MIMAT0003326	POU3F1	PAR-CLIP	23592263
hsa-mir-3196	MIMAT0015080	POU3F1	PAR-CLIP	23592263
hsa-mir-4516	MIMAT0019053	POU3F1	HITS-CLIP	23824327
hsa-mir-7704	MIMAT0030019	POU3F1	PAR-CLIP	23592263
hsa-mir-1469	MIMAT0007347	POU3F3	PAR-CLIP	23446348|26701625|27292025
hsa-mir-3196	MIMAT0015080	POU3F3	HITS-CLIP//PAR-CLIP	23592263|23446348|20371350|23706177|26701625|27292025
hsa-mir-4497	MIMAT0019032	PPAN-P2RY11	HITS-CLIP	28735896
hsa-mir-4745-5p	MIMAT0019878	PPIB	PAR-CLIP	26701625
hsa-mir-7704	MIMAT0030019	PPIC	PAR-CLIP	21572407
hsa-mir-6088	MIMAT0023713	PPIL4	HITS-CLIP	23313552
hsa-mir-4649-5p	MIMAT0019711	PPIL6	HITS-CLIP	23313552
hsa-mir-4739	MIMAT0019868	PPIL6	PAR-CLIP	27292025
hsa-mir-4674	MIMAT0019756	PPM1N	HITS-CLIP	23824327
hsa-mir-8069	MIMAT0030996	PPP1R16B	PAR-CLIP	20371350|26701625
hsa-mir-4689	MIMAT0019778	PPP1R9B	PAR-CLIP	26701625
hsa-mir-4739	MIMAT0019868	PPP1R9B	PAR-CLIP	26701625
hsa-mir-6088	MIMAT0023713	PPP2R2A	PAR-CLIP	26701625
hsa-mir-6088	MIMAT0023713	PPP2R5E	PAR-CLIP	23592263
hsa-mir-4674	MIMAT0019756	PRKAR2A	HITS-CLIP	23824327
hsa-mir-8069	MIMAT0030996	PRKAR2A	HITS-CLIP	27418678
hsa-mir-4516	MIMAT0019053	PRKCH	HITS-CLIP	19536157
hsa-mir-4497	MIMAT0019032	PRPS1	PAR-CLIP	27292025
hsa-mir-4497	MIMAT0019032	PRPS1L1	PAR-CLIP	23446348
hsa-mir-4674	MIMAT0019756	PRPSAP1	HITS-CLIP	23824327
hsa-mir-6088	MIMAT0023713	PRR23A	HITS-CLIP	23824327
hsa-mir-6088	MIMAT0023713	PRRC2B	PAR-CLIP	23592263
hsa-mir-4530	MIMAT0019069	PRRT2	PAR-CLIP	23592263
hsa-mir-663a	MIMAT0003326	PRSS22	HITS-CLIP	23313552
hsa-mir-4488	MIMAT0019022	PRSS8	PAR-CLIP	26701625
hsa-mir-1237-5p	MIMAT0022946	PRSS8	PAR-CLIP	26701625
hsa-mir-663a	MIMAT0003326	PRX	HITS-CLIP	19536157
hsa-mir-4516	MIMAT0019053	PSMD11	PAR-CLIP	23592263
hsa-mir-4745-5p	MIMAT0019878	PSMD11	PAR-CLIP	23592263|24398324
hsa-mir-663a	MIMAT0003326	PSMG1	PAR-CLIP	22100165
hsa-mir-4516	MIMAT0019053	PTCD2	HITS-CLIP	23824327
hsa-mir-4530	MIMAT0019069	PTCH1	HITS-CLIP	23824327|27418678
hsa-mir-663a	MIMAT0003326	PTCHD1	HITS-CLIP	23824327
hsa-mir-3178	MIMAT0015055	PTCHD1	HITS-CLIP	23824327|27418678
hsa-mir-3178	MIMAT0015055	PTDSS2	HITS-CLIP	23824327
hsa-mir-4739	MIMAT0019868	PTDSS2	HITS-CLIP	23824327
hsa-mir-4739	MIMAT0019868	PTGES2	PAR-CLIP	26701625
hsa-mir-4745-5p	MIMAT0019878	PTGES2	PAR-CLIP	23592263
hsa-mir-7704	MIMAT0030019	PTGES2	PAR-CLIP	26701625
hsa-mir-3178	MIMAT0015055	PTGIS	HITS-CLIP	23824327
hsa-mir-663a	MIMAT0003326	PTGR2	HITS-CLIP	19536157
hsa-mir-4516	MIMAT0019053	PTPA	PAR-CLIP	26701625
hsa-mir-4739	MIMAT0019868	PTPA	PAR-CLIP	26701625
hsa-mir-4516	MIMAT0019053	PTPN14	PAR-CLIP	23592263
hsa-mir-4530	MIMAT0019069	PTPRF	HITS-CLIP	19536157
hsa-mir-6800-5p	MIMAT0027500	PUS3	HITS-CLIP	23824327
hsa-mir-4649-5p	MIMAT0019711	PXMP4	HITS-CLIP//PAR-CLIP	23824327|27292025
hsa-mir-8069	MIMAT0030996	QRFPR	HITS-CLIP	19536157
hsa-mir-4530	MIMAT0019069	QSOX1	PAR-CLIP	26701625
hsa-mir-4689	MIMAT0019778	QSOX1	PAR-CLIP	26701625
hsa-mir-4488	MIMAT0019022	QSOX2	PAR-CLIP	23592263|20371350|26701625
hsa-mir-4745-5p	MIMAT0019878	QSOX2	PAR-CLIP	23592263|20371350|26701625
hsa-mir-1237-5p	MIMAT0022946	QSOX2	PAR-CLIP	23592263|20371350|26701625
hsa-mir-4649-5p	MIMAT0019711	QTRT2	HITS-CLIP//PAR-CLIP	21572407|23706177
hsa-mir-3663-3p	MIMAT0018085	R3HDM4	PAR-CLIP	23592263|26701625
hsa-mir-663a	MIMAT0003326	RAB11B	PAR-CLIP	23592263
hsa-mir-3178	MIMAT0015055	RAB11B	PAR-CLIP	26701625|27292025
hsa-mir-3196	MIMAT0015080	RAB11B	PAR-CLIP	23592263
hsa-mir-4488	MIMAT0019022	RAB11B	PAR-CLIP	23592263
hsa-mir-4739	MIMAT0019868	RAB11B	PAR-CLIP	26701625|27292025
hsa-mir-1237-5p	MIMAT0022946	RAB11B	PAR-CLIP	23592263
hsa-mir-4497	MIMAT0019032	RAB22A	PAR-CLIP	20371350
hsa-mir-6088	MIMAT0023713	RAB22A	PAR-CLIP	23592263|21572407
hsa-mir-4516	MIMAT0019053	RAB2B	PAR-CLIP	23592263
hsa-mir-6088	MIMAT0023713	RAB33B	HITS-CLIP	23313552
hsa-mir-8069	MIMAT0030996	RAB3C	HITS-CLIP	21572407
hsa-mir-3663-3p	MIMAT0018085	RAB40C	PAR-CLIP	23592263
hsa-mir-4739	MIMAT0019868	RAB7A	PAR-CLIP	23592263|20371350|26701625
hsa-mir-4497	MIMAT0019032	RAB9A	HITS-CLIP	23824327
hsa-mir-6800-5p	MIMAT0027500	RABGAP1L	HITS-CLIP	23824327
hsa-mir-4516	MIMAT0019053	RAC3	PAR-CLIP	20371350
hsa-mir-4689	MIMAT0019778	RAD18	PAR-CLIP	21572407
hsa-mir-4689	MIMAT0019778	RAD50	PAR-CLIP	23592263
hsa-mir-6789-5p	MIMAT0027478	RAF1	PAR-CLIP	21572407
hsa-mir-4745-5p	MIMAT0019878	RALBP1	PAR-CLIP	26701625
hsa-mir-4739	MIMAT0019868	RALY	PAR-CLIP	26701625
hsa-mir-4739	MIMAT0019868	RARA	PAR-CLIP	23592263
hsa-mir-3196	MIMAT0015080	RASD1	PAR-CLIP	23592263|20371350|26701625
hsa-mir-4488	MIMAT0019022	RASD1	PAR-CLIP	23592263|20371350|26701625
hsa-mir-1237-5p	MIMAT0022946	RASD1	PAR-CLIP	23592263|20371350|26701625
hsa-mir-4689	MIMAT0019778	RASD2	PAR-CLIP	22100165
hsa-mir-4516	MIMAT0019053	RASL10B	PAR-CLIP	23592263
hsa-mir-4649-5p	MIMAT0019711	RASSF9	HITS-CLIP//PAR-CLIP	27292025|27418678
hsa-mir-4530	MIMAT0019069	RBM12B	HITS-CLIP	23313552
hsa-mir-3178	MIMAT0015055	RBM22	HITS-CLIP	23824327
hsa-mir-4516	MIMAT0019053	RBM23	PAR-CLIP	26701625
hsa-mir-4649-5p	MIMAT0019711	RBM23	HITS-CLIP//PAR-CLIP	23313552|27292025
hsa-mir-6088	MIMAT0023713	RBM27	PAR-CLIP	23592263|21572407
hsa-mir-4649-5p	MIMAT0019711	RBM28	HITS-CLIP	23706177
hsa-mir-4516	MIMAT0019053	RBM38	PAR-CLIP	21572407|26701625
hsa-mir-3178	MIMAT0015055	RBMS2	HITS-CLIP	23313552
hsa-mir-4739	MIMAT0019868	RBSN	PAR-CLIP	27292025
hsa-mir-6088	MIMAT0023713	RCOR1	PAR-CLIP	26701625
hsa-mir-150-3p	MIMAT0004610	REEP4	PAR-CLIP	27292025
hsa-mir-3196	MIMAT0015080	REPIN1	PAR-CLIP	26701625
hsa-mir-6088	MIMAT0023713	RER1	PAR-CLIP	23592263
hsa-mir-4516	MIMAT0019053	REST	PAR-CLIP	23446348
hsa-mir-4739	MIMAT0019868	RETREG2	PAR-CLIP	26701625
hsa-mir-3196	MIMAT0015080	REXO1	PAR-CLIP	26701625
hsa-mir-4689	MIMAT0019778	REXO1	PAR-CLIP	24398324|22012620
hsa-mir-4516	MIMAT0019053	REXO2	PAR-CLIP	23592263
hsa-mir-4739	MIMAT0019868	REXO2	PAR-CLIP	23592263
hsa-mir-8069	MIMAT0030996	RFX1	PAR-CLIP	20371350
hsa-mir-6800-5p	MIMAT0027500	RGP1	PAR-CLIP	26701625
hsa-mir-7704	MIMAT0030019	RGS12	HITS-CLIP	19536157
hsa-mir-663a	MIMAT0003326	RGS5	PAR-CLIP	20371350
hsa-mir-4739	MIMAT0019868	RGS6	PAR-CLIP	22291592
hsa-mir-663a	MIMAT0003326	RHOB	PAR-CLIP	27292025
hsa-mir-3196	MIMAT0015080	RHOB	PAR-CLIP	26701625|27292025
hsa-mir-4649-5p	MIMAT0019711	RHOB	PAR-CLIP	26701625|27292025
hsa-mir-8069	MIMAT0030996	RICTOR	PAR-CLIP	23592263
hsa-mir-4674	MIMAT0019756	RIPOR2	HITS-CLIP	23824327
hsa-mir-4745-5p	MIMAT0019878	RNASEH2B	PAR-CLIP	23592263|24398324
hsa-mir-4739	MIMAT0019868	RNF111	PAR-CLIP	23592263|26701625
hsa-mir-4649-5p	MIMAT0019711	RNF115	HITS-CLIP	23824327
hsa-mir-4745-5p	MIMAT0019878	RNF121	PAR-CLIP	23592263
hsa-mir-6088	MIMAT0023713	RNF125	HITS-CLIP	27418678
hsa-mir-3663-3p	MIMAT0018085	RNF138	PAR-CLIP	21572407
hsa-mir-3196	MIMAT0015080	RNF144B	HITS-CLIP	23313552
hsa-mir-4739	MIMAT0019868	RNF157	PAR-CLIP	23592263
hsa-mir-4530	MIMAT0019069	RNF217	HITS-CLIP	23824327
hsa-mir-6789-5p	MIMAT0027478	RNF40	PAR-CLIP	26701625
hsa-mir-7704	MIMAT0030019	RNF40	PAR-CLIP	26701625
hsa-mir-3663-3p	MIMAT0018085	RNF41	PAR-CLIP	21572407
hsa-mir-4530	MIMAT0019069	RNFT2	PAR-CLIP	27292025
hsa-mir-4739	MIMAT0019868	RNMT	PAR-CLIP	26701625
hsa-mir-4649-5p	MIMAT0019711	RNPS1	PAR-CLIP	23592263
hsa-mir-4739	MIMAT0019868	RPH3A	PAR-CLIP	20371350
hsa-mir-7704	MIMAT0030019	RPH3AL	HITS-CLIP	23824327
hsa-mir-150-3p	MIMAT0004610	RPL11	Immuno-precipitation//Luciferase reporter assay//qRT-PCR//Western blot	26606907
hsa-mir-4649-5p	MIMAT0019711	RPL13A	PAR-CLIP	26701625|27292025
hsa-mir-4689	MIMAT0019778	RPL13A	PAR-CLIP	26701625|27292025
hsa-mir-3178	MIMAT0015055	RPL14	PAR-CLIP	27292025
hsa-mir-3663-3p	MIMAT0018085	RPL22	PAR-CLIP	23592263
hsa-mir-3178	MIMAT0015055	RPL24	HITS-CLIP	23313552
hsa-mir-663a	MIMAT0003326	RPL28	PAR-CLIP	26701625
hsa-mir-3196	MIMAT0015080	RPL28	PAR-CLIP	26701625
hsa-mir-4488	MIMAT0019022	RPL28	PAR-CLIP	26701625
hsa-mir-1237-5p	MIMAT0022946	RPL28	PAR-CLIP	26701625
hsa-mir-4530	MIMAT0019069	RPL7L1	PAR-CLIP	20371350
hsa-mir-4530	MIMAT0019069	RPP25	HITS-CLIP	23313552
hsa-mir-4745-5p	MIMAT0019878	RPP25	PAR-CLIP	20371350
hsa-mir-4739	MIMAT0019868	RPRD2	PAR-CLIP	22012620
hsa-mir-4516	MIMAT0019053	RPRM	PAR-CLIP	23592263
hsa-mir-4745-5p	MIMAT0019878	RPRM	PAR-CLIP	23592263
hsa-mir-4649-5p	MIMAT0019711	RPS19	HITS-CLIP	23313552
hsa-mir-6088	MIMAT0023713	RPS19	HITS-CLIP	23313552
hsa-mir-6088	MIMAT0023713	RPS27	PAR-CLIP	22012620|21572407|20371350
hsa-mir-8069	MIMAT0030996	RPS27	PAR-CLIP	22012620|21572407|20371350
hsa-mir-4745-5p	MIMAT0019878	RPS6KA4	PAR-CLIP	26701625
hsa-mir-4739	MIMAT0019868	RRM2	HITS-CLIP	19536157
hsa-mir-4488	MIMAT0019022	RRP7A	PAR-CLIP	23446348|20371350
hsa-mir-1237-5p	MIMAT0022946	RRP7A	PAR-CLIP	23446348|20371350
hsa-mir-6088	MIMAT0023713	RRP7A	HITS-CLIP	21572407|27418678
hsa-mir-4689	MIMAT0019778	RRP8	PAR-CLIP	22100165|22291592
hsa-mir-3196	MIMAT0015080	RSBN1L	HITS-CLIP	23824327
hsa-mir-4530	MIMAT0019069	RSRC1	HITS-CLIP	23824327
hsa-mir-4739	MIMAT0019868	RTKN	PAR-CLIP	23592263
hsa-mir-663a	MIMAT0003326	RTN4R	PAR-CLIP	23592263
hsa-mir-6088	MIMAT0023713	RUNDC1	HITS-CLIP	23824327
hsa-mir-4497	MIMAT0019032	RUNX1	HITS-CLIP	23313552
hsa-mir-4530	MIMAT0019069	RUNX1	PAR-CLIP	20371350
hsa-mir-3196	MIMAT0015080	RUNX3	PAR-CLIP	26701625
hsa-mir-4488	MIMAT0019022	RUNX3	PAR-CLIP	20371350|26701625
hsa-mir-1237-5p	MIMAT0022946	RUNX3	PAR-CLIP	20371350|26701625
hsa-mir-4674	MIMAT0019756	RUSC2	HITS-CLIP	23824327
hsa-mir-3196	MIMAT0015080	RXRB	PAR-CLIP	23592263
hsa-mir-4488	MIMAT0019022	RXRB	PAR-CLIP	23592263
hsa-mir-1237-5p	MIMAT0022946	RXRB	PAR-CLIP	23592263
hsa-mir-4689	MIMAT0019778	S100A16	PAR-CLIP	26701625
hsa-mir-4530	MIMAT0019069	SALL1	PAR-CLIP	21572407|20371350
hsa-mir-3196	MIMAT0015080	SALL4	PAR-CLIP	27292025
hsa-mir-4488	MIMAT0019022	SALL4	PAR-CLIP	27292025
hsa-mir-1237-5p	MIMAT0022946	SALL4	PAR-CLIP	27292025
hsa-mir-4516	MIMAT0019053	SAMD10	PAR-CLIP	23592263
hsa-mir-4739	MIMAT0019868	SAMD10	PAR-CLIP	23592263
hsa-mir-4516	MIMAT0019053	SAMD14	PAR-CLIP	20371350
hsa-mir-6088	MIMAT0023713	SAMD8	PAR-CLIP	23446348
hsa-mir-4488	MIMAT0019022	SARS	PAR-CLIP	26701625
hsa-mir-1237-5p	MIMAT0022946	SARS	PAR-CLIP	26701625
hsa-mir-663a	MIMAT0003326	SBF1	PAR-CLIP	26701625
hsa-mir-3196	MIMAT0015080	SBF1	PAR-CLIP	26701625
hsa-mir-4488	MIMAT0019022	SBF1	PAR-CLIP	26701625
hsa-mir-4745-5p	MIMAT0019878	SBF1	PAR-CLIP	26701625
hsa-mir-1237-5p	MIMAT0022946	SBF1	PAR-CLIP	26701625
hsa-mir-663a	MIMAT0003326	SBK1	PAR-CLIP	26701625
hsa-mir-3196	MIMAT0015080	SBK1	PAR-CLIP	26701625
hsa-mir-4516	MIMAT0019053	SBNO1	PAR-CLIP	26701625
hsa-mir-4674	MIMAT0019756	SBNO1	HITS-CLIP	23824327
hsa-mir-3196	MIMAT0015080	SCAMP3	HITS-CLIP	23313552
hsa-mir-663a	MIMAT0003326	SCAMP4	PAR-CLIP	23592263|26701625
hsa-mir-4516	MIMAT0019053	SCARF1	HITS-CLIP	23313552
hsa-mir-4739	MIMAT0019868	SCD	PAR-CLIP	23592263
hsa-mir-4739	MIMAT0019868	SCML2	PAR-CLIP	26701625
hsa-mir-6088	MIMAT0023713	SCN2B	HITS-CLIP	23824327|27418678
hsa-mir-4530	MIMAT0019069	SCN4B	PAR-CLIP	26701625
hsa-mir-4739	MIMAT0019868	SCO1	HITS-CLIP//PAR-CLIP	23592263|23706177|27292025
hsa-mir-4516	MIMAT0019053	SCOC	PAR-CLIP	20371350
hsa-mir-4739	MIMAT0019868	SDC4	PAR-CLIP	23592263
hsa-mir-8069	MIMAT0030996	SDE2	PAR-CLIP	20371350
hsa-mir-663a	MIMAT0003326	SDF4	PAR-CLIP	23592263
hsa-mir-4497	MIMAT0019032	SDF4	PAR-CLIP	23592263
hsa-mir-7704	MIMAT0030019	SDF4	PAR-CLIP	23592263
hsa-mir-4530	MIMAT0019069	SDHAF2	HITS-CLIP	19536157
hsa-mir-4689	MIMAT0019778	SEC16A	PAR-CLIP	26701625
hsa-mir-4739	MIMAT0019868	SEC16A	PAR-CLIP	26701625
hsa-mir-4745-5p	MIMAT0019878	SEC24C	PAR-CLIP	26701625
hsa-mir-6088	MIMAT0023713	SECISBP2L	PAR-CLIP	23592263|21572407|20371350|26701625|27292025
hsa-mir-4745-5p	MIMAT0019878	SELENON	PAR-CLIP	26701625
hsa-mir-663a	MIMAT0003326	SEMA3F	PAR-CLIP	23592263
hsa-mir-4516	MIMAT0019053	SEMA3F	PAR-CLIP	23592263
hsa-mir-4516	MIMAT0019053	SENP2	PAR-CLIP	26701625
hsa-mir-4739	MIMAT0019868	SENP2	PAR-CLIP	26701625|27292025
hsa-mir-4745-5p	MIMAT0019878	SENP2	PAR-CLIP	26701625
hsa-mir-4739	MIMAT0019868	SEPT2	PAR-CLIP	23446348|21572407|20371350
hsa-mir-3178	MIMAT0015055	SEPT6	PAR-CLIP	23592263
hsa-mir-6800-5p	MIMAT0027500	SERBP1	PAR-CLIP	23446348|21572407|20371350
hsa-mir-4516	MIMAT0019053	SERTAD2	PAR-CLIP	20371350
hsa-mir-4739	MIMAT0019868	SESN2	PAR-CLIP	23592263
hsa-mir-3196	MIMAT0015080	SESTD1	PAR-CLIP	23592263|20371350
hsa-mir-4516	MIMAT0019053	SET	PAR-CLIP	20371350
hsa-mir-4745-5p	MIMAT0019878	SETD1B	PAR-CLIP	23592263
hsa-mir-8069	MIMAT0030996	SETD1B	PAR-CLIP	26701625
hsa-mir-4674	MIMAT0019756	SETD5	PAR-CLIP	23592263|21572407
hsa-mir-6789-5p	MIMAT0027478	SETD5	PAR-CLIP	23592263
hsa-mir-4516	MIMAT0019053	SETDB1	PAR-CLIP	26701625
hsa-mir-4689	MIMAT0019778	SF1	PAR-CLIP	26701625
hsa-mir-4649-5p	MIMAT0019711	SF3A1	HITS-CLIP	23824327|23706177
hsa-mir-8069	MIMAT0030996	SF3B3	PAR-CLIP	23592263
hsa-mir-4530	MIMAT0019069	SFMBT2	PAR-CLIP	23592263|22012620|26701625
hsa-mir-663a	MIMAT0003326	SFN	PAR-CLIP	26701625
hsa-mir-4516	MIMAT0019053	SFN	PAR-CLIP	26701625
hsa-mir-4739	MIMAT0019868	SFN	PAR-CLIP	26701625
hsa-mir-4739	MIMAT0019868	SFT2D2	PAR-CLIP	26701625
hsa-mir-6088	MIMAT0023713	SFT2D2	HITS-CLIP	23313552
hsa-mir-150-3p	MIMAT0004610	SFXN1	PAR-CLIP	23592263
hsa-mir-6088	MIMAT0023713	SGPL1	PAR-CLIP	23592263
hsa-mir-4497	MIMAT0019032	SH2B1	PAR-CLIP	24398324
hsa-mir-4739	MIMAT0019868	SH3BP1	PAR-CLIP	26701625
hsa-mir-4745-5p	MIMAT0019878	SH3GL1	PAR-CLIP	26701625
hsa-mir-4739	MIMAT0019868	SH3RF1	PAR-CLIP	23592263
hsa-mir-4689	MIMAT0019778	SH3TC2	PAR-CLIP	22100165
hsa-mir-4739	MIMAT0019868	SH3TC2	PAR-CLIP	23592263
hsa-mir-3196	MIMAT0015080	SHISA2	HITS-CLIP	23824327
hsa-mir-4488	MIMAT0019022	SHISA2	HITS-CLIP	23824327
hsa-mir-1237-5p	MIMAT0022946	SHISA2	HITS-CLIP	23824327
hsa-mir-4516	MIMAT0019053	SHISA9	PAR-CLIP	23446348|22012620
hsa-mir-4530	MIMAT0019069	SHROOM3	HITS-CLIP	19536157
hsa-mir-4516	MIMAT0019053	SIAH3	PAR-CLIP	22012620
hsa-mir-663a	MIMAT0003326	SIGLEC12	PAR-CLIP	22012620
hsa-mir-3196	MIMAT0015080	SIGLEC12	PAR-CLIP	22012620
hsa-mir-4488	MIMAT0019022	SIGLEC12	PAR-CLIP	22012620
hsa-mir-1237-5p	MIMAT0022946	SIGLEC12	PAR-CLIP	22012620
hsa-mir-4488	MIMAT0019022	SIK1	PAR-CLIP	23592263
hsa-mir-1237-5p	MIMAT0022946	SIK1	PAR-CLIP	23592263
hsa-mir-663a	MIMAT0003326	SIPA1	PAR-CLIP	23592263
hsa-mir-7704	MIMAT0030019	SIPA1	PAR-CLIP	23592263
hsa-mir-4516	MIMAT0019053	SIPA1L1	HITS-CLIP	19536157
hsa-mir-4745-5p	MIMAT0019878	SIT1	HITS-CLIP	23313552
hsa-mir-4739	MIMAT0019868	SIX3	PAR-CLIP	23592263|24398324|20371350
hsa-mir-4745-5p	MIMAT0019878	SIX3	PAR-CLIP	23592263|24398324|20371350
hsa-mir-4488	MIMAT0019022	SIX5	PAR-CLIP	23592263|23446348|20371350
hsa-mir-1237-5p	MIMAT0022946	SIX5	PAR-CLIP	23592263|23446348|20371350
hsa-mir-6088	MIMAT0023713	SKAP2	HITS-CLIP	23824327
hsa-mir-663a	MIMAT0003326	SKI	PAR-CLIP	26701625
hsa-mir-3196	MIMAT0015080	SKI	PAR-CLIP	20371350|26701625
hsa-mir-4488	MIMAT0019022	SLC10A3	PAR-CLIP	27292025
hsa-mir-1237-5p	MIMAT0022946	SLC10A3	PAR-CLIP	27292025
hsa-mir-4516	MIMAT0019053	SLC10A6	HITS-CLIP	23313552
hsa-mir-663a	MIMAT0003326	SLC10A7	PAR-CLIP	24398324|21572407|20371350
hsa-mir-3196	MIMAT0015080	SLC10A7	PAR-CLIP	24398324|21572407|20371350
hsa-mir-4488	MIMAT0019022	SLC10A7	PAR-CLIP	24398324|21572407|20371350
hsa-mir-1237-5p	MIMAT0022946	SLC10A7	PAR-CLIP	24398324|21572407|20371350
hsa-mir-3178	MIMAT0015055	SLC12A5	PAR-CLIP	23592263
hsa-mir-4488	MIMAT0019022	SLC12A5	PAR-CLIP	23592263
hsa-mir-1237-5p	MIMAT0022946	SLC12A5	PAR-CLIP	23592263
hsa-mir-3663-3p	MIMAT0018085	SLC16A1	PAR-CLIP	23592263|21572407
hsa-mir-4649-5p	MIMAT0019711	SLC16A4	HITS-CLIP	23824327
hsa-mir-8069	MIMAT0030996	SLC16A9	HITS-CLIP	23313552
hsa-mir-4745-5p	MIMAT0019878	SLC19A3	PAR-CLIP	23592263
hsa-mir-663a	MIMAT0003326	SLC1A2	HITS-CLIP	23824327
hsa-mir-7704	MIMAT0030019	SLC22A12	HITS-CLIP	19536157
hsa-mir-4689	MIMAT0019778	SLC23A1	PAR-CLIP	22291592
hsa-mir-6088	MIMAT0023713	SLC25A16	HITS-CLIP	23824327|22927820
hsa-mir-4689	MIMAT0019778	SLC25A22	PAR-CLIP	26701625
hsa-mir-6088	MIMAT0023713	SLC25A25	PAR-CLIP	23592263
hsa-mir-6088	MIMAT0023713	SLC25A33	HITS-CLIP	23824327
hsa-mir-4516	MIMAT0019053	SLC25A36	PAR-CLIP	23592263
hsa-mir-4739	MIMAT0019868	SLC26A9	PAR-CLIP	23592263
hsa-mir-4739	MIMAT0019868	SLC27A1	PAR-CLIP	20371350
hsa-mir-4739	MIMAT0019868	SLC29A1	PAR-CLIP	23592263|26701625
hsa-mir-4739	MIMAT0019868	SLC29A2	PAR-CLIP	23592263
hsa-mir-4745-5p	MIMAT0019878	SLC29A2	PAR-CLIP	24398324
hsa-mir-4739	MIMAT0019868	SLC29A4	HITS-CLIP	23824327
hsa-mir-4516	MIMAT0019053	SLC2A1	PAR-CLIP	24398324
hsa-mir-6088	MIMAT0023713	SLC2A14	PAR-CLIP	23592263
hsa-mir-4739	MIMAT0019868	SLC2A4	PAR-CLIP	23592263
hsa-mir-663a	MIMAT0003326	SLC2A4RG	PAR-CLIP	26701625
hsa-mir-4739	MIMAT0019868	SLC30A7	PAR-CLIP	23592263
hsa-mir-6088	MIMAT0023713	SLC30A9	PAR-CLIP	20371350
hsa-mir-6088	MIMAT0023713	SLC35F6	HITS-CLIP	23824327
hsa-mir-4530	MIMAT0019069	SLC36A1	PAR-CLIP	23592263
hsa-mir-4649-5p	MIMAT0019711	SLC36A1	PAR-CLIP	23592263
hsa-mir-4689	MIMAT0019778	SLC38A4	PAR-CLIP	23592263
hsa-mir-3196	MIMAT0015080	SLC39A11	PAR-CLIP	26701625
hsa-mir-4530	MIMAT0019069	SLC39A9	PAR-CLIP	23592263|21572407
hsa-mir-663a	MIMAT0003326	SLC47A1	PAR-CLIP	23592263
hsa-mir-4516	MIMAT0019053	SLC4A2	PAR-CLIP	23592263
hsa-mir-3663-3p	MIMAT0018085	SLC5A2	PAR-CLIP	22012620
hsa-mir-4739	MIMAT0019868	SLC6A17	PAR-CLIP	26701625
hsa-mir-3663-3p	MIMAT0018085	SLC6A8	PAR-CLIP	20371350
hsa-mir-4674	MIMAT0019756	SLC6A8	HITS-CLIP	23824327
hsa-mir-4689	MIMAT0019778	SLC7A1	PAR-CLIP	23592263
hsa-mir-663a	MIMAT0003326	SLC7A5	Microarray//PAR-CLIP//qRT-PCR	21378144|26701625
hsa-mir-3196	MIMAT0015080	SLC7A5	PAR-CLIP	26701625
hsa-mir-4488	MIMAT0019022	SLC7A5	PAR-CLIP	26701625
hsa-mir-4516	MIMAT0019053	SLC7A5	PAR-CLIP	23592263|24398324|22012620|26701625
hsa-mir-4530	MIMAT0019069	SLC7A5	PAR-CLIP	26701625
hsa-mir-4745-5p	MIMAT0019878	SLC7A5	PAR-CLIP	26701625
hsa-mir-1237-5p	MIMAT0022946	SLC7A5	PAR-CLIP	26701625
hsa-mir-4530	MIMAT0019069	SLC7A7	PAR-CLIP	22012620
hsa-mir-4689	MIMAT0019778	SLC9A3R1	PAR-CLIP	26701625
hsa-mir-4739	MIMAT0019868	SLC9A3R1	PAR-CLIP	26701625
hsa-mir-3196	MIMAT0015080	SLC9A7	HITS-CLIP	23824327
hsa-mir-4689	MIMAT0019778	SLCO3A1	HITS-CLIP	23313552
hsa-mir-4689	MIMAT0019778	SLCO4C1	PAR-CLIP	22100165
hsa-mir-4516	MIMAT0019053	SLF1	HITS-CLIP	23824327|19536157
hsa-mir-4530	MIMAT0019069	SLFN12L	HITS-CLIP	23824327
hsa-mir-3196	MIMAT0015080	SLITRK5	PAR-CLIP	23592263
hsa-mir-6088	MIMAT0023713	SMARCD2	PAR-CLIP	26701625
hsa-mir-4488	MIMAT0019022	SMOX	PAR-CLIP	26701625
hsa-mir-1237-5p	MIMAT0022946	SMOX	PAR-CLIP	26701625
hsa-mir-4516	MIMAT0019053	SMYD2	PAR-CLIP	22100165
hsa-mir-4739	MIMAT0019868	SNAP23	PAR-CLIP	23592263
hsa-mir-3663-3p	MIMAT0018085	SNAP29	HITS-CLIP	23824327
hsa-mir-4674	MIMAT0019756	SNCG	Luciferase reporter assay//qRT-PCR//Western blot	24040069
hsa-mir-7704	MIMAT0030019	SNCG	PAR-CLIP	26701625
hsa-mir-4516	MIMAT0019053	SND1	PAR-CLIP	23592263
hsa-mir-4745-5p	MIMAT0019878	SNRPA1	PAR-CLIP	21572407
hsa-mir-4516	MIMAT0019053	SNRPD1	HITS-CLIP	23824327
hsa-mir-4649-5p	MIMAT0019711	SNX11	PAR-CLIP	26701625
hsa-mir-4739	MIMAT0019868	SNX11	PAR-CLIP	26701625
hsa-mir-4745-5p	MIMAT0019878	SNX11	PAR-CLIP	26701625
hsa-mir-6088	MIMAT0023713	SNX2	HITS-CLIP	27418678
hsa-mir-4745-5p	MIMAT0019878	SNX24	PAR-CLIP	22012620
hsa-mir-4739	MIMAT0019868	SOAT1	PAR-CLIP	27292025
hsa-mir-4745-5p	MIMAT0019878	SOCS7	PAR-CLIP	26701625
hsa-mir-150-3p	MIMAT0004610	SOD2	HITS-CLIP	23824327
hsa-mir-4516	MIMAT0019053	SOD2	PAR-CLIP	23592263|24398324|23446348|21572407
hsa-mir-4739	MIMAT0019868	SORCS2	PAR-CLIP	23592263
hsa-mir-4530	MIMAT0019069	SOWAHC	HITS-CLIP//PAR-CLIP	21572407|20371350
hsa-mir-4516	MIMAT0019053	SOX4	PAR-CLIP	20371350
hsa-mir-6789-5p	MIMAT0027478	SOX4	PAR-CLIP	20371350
hsa-mir-4530	MIMAT0019069	SP1	PAR-CLIP	20371350
hsa-mir-6088	MIMAT0023713	SP110	HITS-CLIP	27418678
hsa-mir-4497	MIMAT0019032	SP140L	PAR-CLIP	27292025
hsa-mir-4739	MIMAT0019868	SP2	PAR-CLIP	23592263
hsa-mir-4674	MIMAT0019756	SPA17	HITS-CLIP	19536157
hsa-mir-3196	MIMAT0015080	SPATA2	PAR-CLIP	26701625
hsa-mir-4488	MIMAT0019022	SPATA2	PAR-CLIP	26701625
hsa-mir-1237-5p	MIMAT0022946	SPATA2	PAR-CLIP	26701625
hsa-mir-4516	MIMAT0019053	SPATA6	PAR-CLIP	23592263|20371350|26701625
hsa-mir-4649-5p	MIMAT0019711	SPC24	PAR-CLIP	27292025
hsa-mir-4745-5p	MIMAT0019878	SPCS3	PAR-CLIP	21572407
hsa-mir-4739	MIMAT0019868	SPEF1	PAR-CLIP	26701625
hsa-mir-4516	MIMAT0019053	SPOPL	PAR-CLIP	23592263
hsa-mir-4689	MIMAT0019778	SPOPL	PAR-CLIP	23592263
hsa-mir-3178	MIMAT0015055	SPPL2A	HITS-CLIP	23824327
hsa-mir-663a	MIMAT0003326	SPRY4	PAR-CLIP	23592263|26701625
hsa-mir-4516	MIMAT0019053	SPRY4	PAR-CLIP	26701625
hsa-mir-4739	MIMAT0019868	SPRY4	PAR-CLIP	26701625
hsa-mir-4516	MIMAT0019053	SPRYD3	PAR-CLIP	26701625
hsa-mir-4530	MIMAT0019069	SPRYD3	PAR-CLIP	26701625
hsa-mir-6088	MIMAT0023713	SPTLC2	PAR-CLIP	23446348
hsa-mir-8069	MIMAT0030996	SQSTM1	PAR-CLIP	24398324|21572407
hsa-mir-663a	MIMAT0003326	SRCIN1	PAR-CLIP	23592263
hsa-mir-4739	MIMAT0019868	SRCIN1	PAR-CLIP	23592263
hsa-mir-4745-5p	MIMAT0019878	SRD5A1	PAR-CLIP	22012620
hsa-mir-4745-5p	MIMAT0019878	SRD5A3	PAR-CLIP	26701625
hsa-mir-4739	MIMAT0019868	SRF	PAR-CLIP	26701625
hsa-mir-4739	MIMAT0019868	SRP19	HITS-CLIP	23824327|19536157
hsa-mir-4649-5p	MIMAT0019711	SRP54	PAR-CLIP	21572407
hsa-mir-3178	MIMAT0015055	SRPX2	HITS-CLIP	23824327
hsa-mir-6789-5p	MIMAT0027478	SRSF2	HITS-CLIP	23313552
hsa-mir-6800-5p	MIMAT0027500	SRSF6	PAR-CLIP	20371350
hsa-mir-4674	MIMAT0019756	SRSF9	PAR-CLIP	21572407
hsa-mir-150-3p	MIMAT0004610	SRXN1	HITS-CLIP	23313552
hsa-mir-3178	MIMAT0015055	SSR3	HITS-CLIP	23824327
hsa-mir-4530	MIMAT0019069	SSR3	HITS-CLIP	23824327
hsa-mir-4739	MIMAT0019868	SSU72	PAR-CLIP	26701625
hsa-mir-3196	MIMAT0015080	ST7L	PAR-CLIP	23592263
hsa-mir-4739	MIMAT0019868	ST7L	PAR-CLIP	23592263
hsa-mir-6088	MIMAT0023713	STAR	HITS-CLIP	27418678
hsa-mir-4739	MIMAT0019868	STARD3	PAR-CLIP	23592263
hsa-mir-4516	MIMAT0019053	STAT3	Luciferase reporter assay//Microarray//qRT-PCR//Western blot	24610393
hsa-mir-4689	MIMAT0019778	STC2	PAR-CLIP	27292025
hsa-mir-4488	MIMAT0019022	STEAP3	PAR-CLIP	23592263|20371350
hsa-mir-1237-5p	MIMAT0022946	STEAP3	PAR-CLIP	23592263|20371350
hsa-mir-3178	MIMAT0015055	STIL	HITS-CLIP	23824327
hsa-mir-6789-5p	MIMAT0027478	STIP1	PAR-CLIP	26701625
hsa-mir-4530	MIMAT0019069	STK11	PAR-CLIP	26701625
hsa-mir-4649-5p	MIMAT0019711	STK35	PAR-CLIP	26701625
hsa-mir-4739	MIMAT0019868	STK35	HITS-CLIP	19536157
hsa-mir-4530	MIMAT0019069	STK4	HITS-CLIP	23824327
hsa-mir-663a	MIMAT0003326	STMN3	PAR-CLIP	23592263|20371350|26701625
hsa-mir-3196	MIMAT0015080	STMN3	PAR-CLIP	23592263|20371350|26701625
hsa-mir-4488	MIMAT0019022	STMN3	PAR-CLIP	23592263|20371350|26701625
hsa-mir-1237-5p	MIMAT0022946	STMN3	PAR-CLIP	23592263|20371350|26701625
hsa-mir-6088	MIMAT0023713	STOX2	PAR-CLIP	21572407|20371350
hsa-mir-4488	MIMAT0019022	STX1A	PAR-CLIP	26701625
hsa-mir-4739	MIMAT0019868	STX1A	PAR-CLIP	26701625
hsa-mir-1237-5p	MIMAT0022946	STX1A	PAR-CLIP	26701625
hsa-mir-3178	MIMAT0015055	STX4	HITS-CLIP	23824327
hsa-mir-4530	MIMAT0019069	STX6	PAR-CLIP	21572407
hsa-mir-4689	MIMAT0019778	STX6	PAR-CLIP	23592263|23446348|21572407
hsa-mir-150-3p	MIMAT0004610	STXBP5L	HITS-CLIP	23824327
hsa-mir-4530	MIMAT0019069	SUGT1	HITS-CLIP	23824327|23313552
hsa-mir-4739	MIMAT0019868	SUGT1	PAR-CLIP	23592263|20371350
hsa-mir-4516	MIMAT0019053	SULT1B1	PAR-CLIP	20371350
hsa-mir-4516	MIMAT0019053	SUMO1	PAR-CLIP	23592263
hsa-mir-4739	MIMAT0019868	SUMO1	PAR-CLIP	23592263|23446348|20371350
hsa-mir-4745-5p	MIMAT0019878	SUMO1	PAR-CLIP	23592263|23446348|20371350
hsa-mir-3178	MIMAT0015055	SVIP	HITS-CLIP	23824327
hsa-mir-6088	MIMAT0023713	SWSAP1	HITS-CLIP	27418678
hsa-mir-4689	MIMAT0019778	SYNCRIP	PAR-CLIP	22100165
hsa-mir-663a	MIMAT0003326	SYNGR1	PAR-CLIP	23592263|20371350|26701625
hsa-mir-3196	MIMAT0015080	SYNGR1	PAR-CLIP	23592263|20371350|26701625
hsa-mir-4745-5p	MIMAT0019878	SYT2	PAR-CLIP	23592263|27292025
hsa-mir-4516	MIMAT0019053	SYT7	PAR-CLIP	23592263|26701625
hsa-mir-6088	MIMAT0023713	SYT7	PAR-CLIP	23592263|26701625
hsa-mir-663a	MIMAT0003326	TACC3	PAR-CLIP	23592263
hsa-mir-3196	MIMAT0015080	TACC3	PAR-CLIP	23592263
hsa-mir-4488	MIMAT0019022	TACC3	PAR-CLIP	23592263
hsa-mir-1237-5p	MIMAT0022946	TACC3	PAR-CLIP	23592263
hsa-mir-3178	MIMAT0015055	TAF1	HITS-CLIP	23824327
hsa-mir-6800-5p	MIMAT0027500	TAF11	PAR-CLIP	21572407
hsa-mir-4516	MIMAT0019053	TAF12	PAR-CLIP	23592263
hsa-mir-6088	MIMAT0023713	TAF1D	HITS-CLIP//PAR-CLIP	23592263|23706177
hsa-mir-4516	MIMAT0019053	TAF7	PAR-CLIP	20371350
hsa-mir-4739	MIMAT0019868	TAGLN	PAR-CLIP	22291592
hsa-mir-4530	MIMAT0019069	TAPBP	PAR-CLIP	22291592
hsa-mir-4516	MIMAT0019053	TBC1D13	HITS-CLIP//PAR-CLIP	23446348|24906430|23824327|23313552|27292025|27418678
hsa-mir-4745-5p	MIMAT0019878	TBC1D13	PAR-CLIP	23446348|27292025
hsa-mir-4497	MIMAT0019032	TBC1D24	PAR-CLIP	27292025
hsa-mir-4739	MIMAT0019868	TBC1D25	PAR-CLIP	23592263
hsa-mir-7704	MIMAT0030019	TBC1D25	PAR-CLIP	23592263
hsa-mir-4488	MIMAT0019022	TBC1D28	PAR-CLIP	23592263
hsa-mir-1237-5p	MIMAT0022946	TBC1D28	PAR-CLIP	23592263
hsa-mir-8069	MIMAT0030996	TBC1D4	PAR-CLIP	20371350
hsa-mir-4649-5p	MIMAT0019711	TBCCD1	PAR-CLIP	21572407|27292025
hsa-mir-4516	MIMAT0019053	TBL1XR1	PAR-CLIP	23592263
hsa-mir-6800-5p	MIMAT0027500	TBRG1	PAR-CLIP	23592263
hsa-mir-663a	MIMAT0003326	TCEAL1	Luciferase reporter assay	22249270
hsa-mir-4689	MIMAT0019778	TCEANC	PAR-CLIP	22100165
hsa-mir-150-3p	MIMAT0004610	TCEANC2	HITS-CLIP	23824327
hsa-mir-4745-5p	MIMAT0019878	TCHHL1	PAR-CLIP	20371350
hsa-mir-6088	MIMAT0023713	TECPR1	HITS-CLIP	27418678
hsa-mir-6088	MIMAT0023713	TERT	PAR-CLIP	27292025
hsa-mir-7704	MIMAT0030019	TEX261	PAR-CLIP	23592263|23446348|26701625
hsa-mir-4488	MIMAT0019022	TFAP4	PAR-CLIP	26701625
hsa-mir-1237-5p	MIMAT0022946	TFAP4	PAR-CLIP	26701625
hsa-mir-4745-5p	MIMAT0019878	TFPI	PAR-CLIP	23446348
hsa-mir-6088	MIMAT0023713	TFPI	PAR-CLIP	23592263
hsa-mir-663a	MIMAT0003326	TGFB1	Luciferase reporter assay//qRT-PCR//Western blot	22393947|27624777
hsa-mir-3663-3p	MIMAT0018085	TGFBR3L	PAR-CLIP	26701625
hsa-mir-6088	MIMAT0023713	THAP1	HITS-CLIP	23824327
hsa-mir-4739	MIMAT0019868	THBS1	PAR-CLIP	23592263
hsa-mir-663a	MIMAT0003326	THBS2	HITS-CLIP	19536157
hsa-mir-4739	MIMAT0019868	THRA	PAR-CLIP	20371350
hsa-mir-663a	MIMAT0003326	THSD4	PAR-CLIP	23592263
hsa-mir-3196	MIMAT0015080	THSD4	PAR-CLIP	23592263
hsa-mir-4488	MIMAT0019022	THSD4	PAR-CLIP	23592263
hsa-mir-1237-5p	MIMAT0022946	THSD4	PAR-CLIP	23592263
hsa-mir-4649-5p	MIMAT0019711	THY1	PAR-CLIP	23592263
hsa-mir-4649-5p	MIMAT0019711	TIMM8A	PAR-CLIP	21572407
hsa-mir-4674	MIMAT0019756	TIMM8A	HITS-CLIP	23824327
hsa-mir-6088	MIMAT0023713	TIMM8A	HITS-CLIP	23824327
hsa-mir-4745-5p	MIMAT0019878	TIMP1	PAR-CLIP	26701625
hsa-mir-4488	MIMAT0019022	TJAP1	PAR-CLIP	21572407|26701625
hsa-mir-4745-5p	MIMAT0019878	TJAP1	PAR-CLIP	21572407|26701625
hsa-mir-1237-5p	MIMAT0022946	TJAP1	PAR-CLIP	21572407|26701625
hsa-mir-4516	MIMAT0019053	TJP3	PAR-CLIP	23592263|20371350
hsa-mir-4739	MIMAT0019868	TJP3	PAR-CLIP	23592263|20371350
hsa-mir-4689	MIMAT0019778	TLE3	PAR-CLIP	23592263
hsa-mir-4689	MIMAT0019778	TMBIM4	PAR-CLIP	20371350
hsa-mir-4649-5p	MIMAT0019711	TMCO1	HITS-CLIP	23706177
hsa-mir-3178	MIMAT0015055	TMEM105	HITS-CLIP	23824327
hsa-mir-4674	MIMAT0019756	TMEM120B	HITS-CLIP	23706177
hsa-mir-4739	MIMAT0019868	TMEM127	PAR-CLIP	26701625
hsa-mir-4745-5p	MIMAT0019878	TMEM135	PAR-CLIP	22012620
hsa-mir-150-3p	MIMAT0004610	TMEM138	PAR-CLIP	26701625
hsa-mir-4739	MIMAT0019868	TMEM138	PAR-CLIP	21572407
hsa-mir-4516	MIMAT0019053	TMEM167A	PAR-CLIP	23446348|20371350
hsa-mir-6800-5p	MIMAT0027500	TMEM170A	PAR-CLIP	23592263
hsa-mir-4739	MIMAT0019868	TMEM184A	PAR-CLIP	20371350
hsa-mir-4689	MIMAT0019778	TMEM189	PAR-CLIP	23592263|21572407
hsa-mir-8069	MIMAT0030996	TMEM189	PAR-CLIP	23592263
hsa-mir-4689	MIMAT0019778	TMEM189-UBE2V1	PAR-CLIP	23592263|21572407
hsa-mir-8069	MIMAT0030996	TMEM189-UBE2V1	PAR-CLIP	23592263
hsa-mir-4530	MIMAT0019069	TMEM199	HITS-CLIP	19536157
hsa-mir-6088	MIMAT0023713	TMEM214	PAR-CLIP	26701625
hsa-mir-4739	MIMAT0019868	TMEM216	PAR-CLIP	27292025
hsa-mir-4649-5p	MIMAT0019711	TMEM30B	PAR-CLIP	20371350
hsa-mir-4689	MIMAT0019778	TMEM30B	PAR-CLIP	24398324
hsa-mir-4497	MIMAT0019032	TMEM33	PAR-CLIP	27292025
hsa-mir-6088	MIMAT0023713	TMEM33	PAR-CLIP	27292025
hsa-mir-4745-5p	MIMAT0019878	TMEM41B	PAR-CLIP	26701625
hsa-mir-4689	MIMAT0019778	TMEM50A	PAR-CLIP	22100165
hsa-mir-4516	MIMAT0019053	TMEM63A	PAR-CLIP	23592263
hsa-mir-4739	MIMAT0019868	TMEM63C	PAR-CLIP	23592263
hsa-mir-4745-5p	MIMAT0019878	TMEM67	PAR-CLIP	22291592
hsa-mir-8069	MIMAT0030996	TMEM67	HITS-CLIP	19536157
hsa-mir-4530	MIMAT0019069	TMEM74B	PAR-CLIP	22012620
hsa-mir-8069	MIMAT0030996	TMEM81	PAR-CLIP	21572407|20371350
hsa-mir-6789-5p	MIMAT0027478	TMEM91	PAR-CLIP	23592263
hsa-mir-8069	MIMAT0030996	TMPPE	PAR-CLIP	23592263
hsa-mir-4739	MIMAT0019868	TMPRSS5	PAR-CLIP	23592263
hsa-mir-3663-3p	MIMAT0018085	TMTC3	PAR-CLIP	21572407|20371350
hsa-mir-4516	MIMAT0019053	TNFAIP1	PAR-CLIP	22100165
hsa-mir-4745-5p	MIMAT0019878	TNFRSF10A	PAR-CLIP	26701625
hsa-mir-4516	MIMAT0019053	TNFRSF21	PAR-CLIP	20371350
hsa-mir-6800-5p	MIMAT0027500	TNIP2	PAR-CLIP	20371350
hsa-mir-4516	MIMAT0019053	TNPO2	PAR-CLIP	23592263
hsa-mir-4689	MIMAT0019778	TNPO2	PAR-CLIP	23592263
hsa-mir-4739	MIMAT0019868	TNRC6B	PAR-CLIP	23592263|20371350
hsa-mir-4689	MIMAT0019778	TNS1	HITS-CLIP	19536157
hsa-mir-4739	MIMAT0019868	TOB2	PAR-CLIP	23592263
hsa-mir-4745-5p	MIMAT0019878	TOB2	PAR-CLIP	20371350
hsa-mir-663a	MIMAT0003326	TOMM40	PAR-CLIP	26701625
hsa-mir-7704	MIMAT0030019	TOMM70	PAR-CLIP	22012620
hsa-mir-4689	MIMAT0019778	TOR1B	PAR-CLIP	23592263
hsa-mir-663a	MIMAT0003326	TOR4A	PAR-CLIP	23592263|27292025
hsa-mir-3196	MIMAT0015080	TOR4A	PAR-CLIP	27292025
hsa-mir-4516	MIMAT0019053	TOR4A	PAR-CLIP	26701625
hsa-mir-663a	MIMAT0003326	TP53	Luciferase reporter assay	27105517
hsa-mir-150-3p	MIMAT0004610	TP53	qRT-PCR//Western blot	27081855
hsa-mir-4516	MIMAT0019053	TP53	PAR-CLIP	23592263
hsa-mir-4745-5p	MIMAT0019878	TPCN2	PAR-CLIP	20371350
hsa-mir-8069	MIMAT0030996	TPD52L1	PAR-CLIP	24398324
hsa-mir-4516	MIMAT0019053	TPM2	PAR-CLIP	23592263
hsa-mir-3196	MIMAT0015080	TPM3	PAR-CLIP	26701625
hsa-mir-4497	MIMAT0019032	TPM3	PAR-CLIP	23592263
hsa-mir-4739	MIMAT0019868	TPM3	PAR-CLIP	23592263|23446348|20371350|26701625
hsa-mir-3663-3p	MIMAT0018085	TPR	PAR-CLIP	27292025
hsa-mir-4530	MIMAT0019069	TRADD	PAR-CLIP	23708386
hsa-mir-4530	MIMAT0019069	TRAF2	HITS-CLIP	19536157
hsa-mir-3178	MIMAT0015055	TRAF3	Immunohistochemistry//Luciferase reporter assay//Microarray//qRT-PCR//Western blot	27493095
hsa-mir-4649-5p	MIMAT0019711	TRAF3IP1	PAR-CLIP	27292025
hsa-mir-4516	MIMAT0019053	TRAF6	PAR-CLIP	23592263
hsa-mir-4530	MIMAT0019069	TRAF7	PAR-CLIP	26701625
hsa-mir-4739	MIMAT0019868	TRAF7	PAR-CLIP	26701625
hsa-mir-4739	MIMAT0019868	TRAPPC10	PAR-CLIP	26701625
hsa-mir-4516	MIMAT0019053	TRIB3	PAR-CLIP	23592263
hsa-mir-3663-3p	MIMAT0018085	TRIM25	PAR-CLIP	22100165
hsa-mir-4745-5p	MIMAT0019878	TRIM28	PAR-CLIP	23592263|26701625
hsa-mir-4674	MIMAT0019756	TRIM44	PAR-CLIP	23592263
hsa-mir-4739	MIMAT0019868	TRIM44	PAR-CLIP	21572407
hsa-mir-4516	MIMAT0019053	TRIM56	PAR-CLIP	22012620
hsa-mir-7704	MIMAT0030019	TRIM56	HITS-CLIP	27418678
hsa-mir-663a	MIMAT0003326	TRIM59	PAR-CLIP	23446348
hsa-mir-4739	MIMAT0019868	TRIM67	PAR-CLIP	20371350
hsa-mir-4689	MIMAT0019778	TRIM71	PAR-CLIP	22012620
hsa-mir-6088	MIMAT0023713	TRIM71	HITS-CLIP	23824327
hsa-mir-4689	MIMAT0019778	TRIR	PAR-CLIP	23592263|26701625
hsa-mir-4739	MIMAT0019868	TRIR	PAR-CLIP	26701625
hsa-mir-4649-5p	MIMAT0019711	TRMO	HITS-CLIP	23706177
hsa-mir-4689	MIMAT0019778	TRMT10C	HITS-CLIP	27418678
hsa-mir-6088	MIMAT0023713	TRMT2B	HITS-CLIP	27418678
hsa-mir-4530	MIMAT0019069	TRUB2	PAR-CLIP	23446348
hsa-mir-4689	MIMAT0019778	TSC22D1	PAR-CLIP	23592263
hsa-mir-4739	MIMAT0019868	TSPAN11	HITS-CLIP	19536157
hsa-mir-4649-5p	MIMAT0019711	TSPEAR-AS2	PAR-CLIP	27292025
hsa-mir-6088	MIMAT0023713	TTC38	HITS-CLIP	23824327
hsa-mir-4745-5p	MIMAT0019878	TTC9C	HITS-CLIP	23824327
hsa-mir-4739	MIMAT0019868	TTF2	PAR-CLIP	23592263
hsa-mir-6088	MIMAT0023713	TTYH3	PAR-CLIP	26701625
hsa-mir-3663-3p	MIMAT0018085	TUBB2A	PAR-CLIP	26701625
hsa-mir-4674	MIMAT0019756	TUBB2A	PAR-CLIP	20371350
hsa-mir-4739	MIMAT0019868	TUBB2A	PAR-CLIP	23592263
hsa-mir-6088	MIMAT0023713	TUBB2A	PAR-CLIP	24398324|21572407|20371350
hsa-mir-7704	MIMAT0030019	TUBB4A	PAR-CLIP	26701625
hsa-mir-3178	MIMAT0015055	TULP1	PAR-CLIP	23592263|24398324|20371350|27292025
hsa-mir-3196	MIMAT0015080	TULP1	PAR-CLIP	23592263|24398324|20371350|27292025
hsa-mir-6088	MIMAT0023713	TULP3	PAR-CLIP	26701625
hsa-mir-4488	MIMAT0019022	TXLNA	PAR-CLIP	23592263|21572407
hsa-mir-4689	MIMAT0019778	TXLNA	PAR-CLIP	23592263|21572407
hsa-mir-1237-5p	MIMAT0022946	TXLNA	PAR-CLIP	23592263|21572407
hsa-mir-4530	MIMAT0019069	TXNDC5	PAR-CLIP	23592263
hsa-mir-4745-5p	MIMAT0019878	TXNRD3NB	HITS-CLIP	23824327
hsa-mir-3178	MIMAT0015055	U2AF2	PAR-CLIP	26701625
hsa-mir-8069	MIMAT0030996	UBA6	PAR-CLIP	23446348|22012620|20371350
hsa-mir-4649-5p	MIMAT0019711	UBC	HITS-CLIP	27418678
hsa-mir-4674	MIMAT0019756	UBE2D2	PAR-CLIP	21572407
hsa-mir-4739	MIMAT0019868	UBE2D3	PAR-CLIP	26701625
hsa-mir-4516	MIMAT0019053	UBE2G1	PAR-CLIP	23592263
hsa-mir-6800-5p	MIMAT0027500	UBE2G1	PAR-CLIP	23592263
hsa-mir-4745-5p	MIMAT0019878	UBE2Q1	PAR-CLIP	23592263|27292025
hsa-mir-6800-5p	MIMAT0027500	UBE2Q1	PAR-CLIP	23592263|27292025
hsa-mir-4739	MIMAT0019868	UBE2S	PAR-CLIP	23592263|26701625
hsa-mir-7704	MIMAT0030019	UBE2S	PAR-CLIP	23592263|26701625
hsa-mir-4689	MIMAT0019778	UBE2V1	PAR-CLIP	23592263|21572407
hsa-mir-8069	MIMAT0030996	UBE2V1	PAR-CLIP	23592263
hsa-mir-6088	MIMAT0023713	UBE2V2	HITS-CLIP	23824327
hsa-mir-4745-5p	MIMAT0019878	UBE2Z	PAR-CLIP	26701625
hsa-mir-4739	MIMAT0019868	UBL4A	PAR-CLIP	23446348
hsa-mir-150-3p	MIMAT0004610	UBN2	PAR-CLIP	20371350
hsa-mir-6789-5p	MIMAT0027478	UBQLN4	PAR-CLIP	23592263
hsa-mir-7704	MIMAT0030019	UBQLN4	PAR-CLIP	27292025
hsa-mir-4745-5p	MIMAT0019878	UBTF	PAR-CLIP	23592263
hsa-mir-4516	MIMAT0019053	UBXN2A	PAR-CLIP	21572407
hsa-mir-6088	MIMAT0023713	UCK2	PAR-CLIP	23592263
hsa-mir-4739	MIMAT0019868	UCP2	PAR-CLIP	23708386
hsa-mir-4497	MIMAT0019032	UGT8	HITS-CLIP	23824327
hsa-mir-4516	MIMAT0019053	UHRF1BP1	HITS-CLIP//PAR-CLIP	20371350|23706177
hsa-mir-3178	MIMAT0015055	ULBP3	HITS-CLIP	23824327|23313552
hsa-mir-4689	MIMAT0019778	UNC119B	PAR-CLIP	23592263
hsa-mir-663a	MIMAT0003326	UNC13A	HITS-CLIP	19536157
hsa-mir-4739	MIMAT0019868	UNC93B1	PAR-CLIP	26701625
hsa-mir-663a	MIMAT0003326	UNK	PAR-CLIP	23592263|27292025
hsa-mir-3196	MIMAT0015080	UNK	PAR-CLIP	23592263|27292025
hsa-mir-4745-5p	MIMAT0019878	UNK	PAR-CLIP	23592263|23446348|20371350
hsa-mir-4739	MIMAT0019868	UPK3BL1	PAR-CLIP	23592263
hsa-mir-3196	MIMAT0015080	UQCC3	PAR-CLIP	26701625|27292025
hsa-mir-4516	MIMAT0019053	USP36	PAR-CLIP	23592263
hsa-mir-6088	MIMAT0023713	USP42	PAR-CLIP	23446348|21572407|20371350
hsa-mir-663a	MIMAT0003326	VASP	HITS-CLIP	19536157
hsa-mir-663a	MIMAT0003326	VAV3	PAR-CLIP	23592263|22012620|20371350|27292025
hsa-mir-3178	MIMAT0015055	VAV3	HITS-CLIP//PAR-CLIP	24906430|23824327|23706177|23313552|22927820|21572407|26701625
hsa-mir-4739	MIMAT0019868	VCL	PAR-CLIP	23592263
hsa-mir-7704	MIMAT0030019	VDR	HITS-CLIP	19536157
hsa-mir-4497	MIMAT0019032	VEGFA	HITS-CLIP	21572407
hsa-mir-663a	MIMAT0003326	VGF	PAR-CLIP	23592263
hsa-mir-4488	MIMAT0019022	VGF	PAR-CLIP	23592263|20371350
hsa-mir-1237-5p	MIMAT0022946	VGF	PAR-CLIP	23592263|20371350
hsa-mir-4530	MIMAT0019069	VHLL	HITS-CLIP	19536157
hsa-mir-150-3p	MIMAT0004610	VMP1	PAR-CLIP	26701625
hsa-mir-4689	MIMAT0019778	VNN1	PAR-CLIP	22100165
hsa-mir-6088	MIMAT0023713	VOPP1	PAR-CLIP	22100165
hsa-mir-663a	MIMAT0003326	VPS18	HITS-CLIP	19536157
hsa-mir-3196	MIMAT0015080	VPS18	HITS-CLIP	19536157
hsa-mir-4739	MIMAT0019868	VPS37D	PAR-CLIP	20371350
hsa-mir-6789-5p	MIMAT0027478	VPS4A	PAR-CLIP	24398324|23446348|21572407|20371350
hsa-mir-3196	MIMAT0015080	VPS51	PAR-CLIP	23592263|20371350|26701625
hsa-mir-4488	MIMAT0019022	VPS51	PAR-CLIP	23592263|20371350|26701625
hsa-mir-1237-5p	MIMAT0022946	VPS51	PAR-CLIP	23592263|20371350|26701625
hsa-mir-663a	MIMAT0003326	VPS8	HITS-CLIP	19536157
hsa-mir-4739	MIMAT0019868	VSTM4	PAR-CLIP	27292025
hsa-mir-663a	MIMAT0003326	WBP2	PAR-CLIP	26701625
hsa-mir-4530	MIMAT0019069	WBP2	PAR-CLIP	23592263
hsa-mir-3178	MIMAT0015055	WDR1	PAR-CLIP	23592263
hsa-mir-150-3p	MIMAT0004610	WDR26	PAR-CLIP	21572407|20371350
hsa-mir-4488	MIMAT0019022	WDR45B	PAR-CLIP	26701625
hsa-mir-1237-5p	MIMAT0022946	WDR45B	PAR-CLIP	26701625
hsa-mir-4689	MIMAT0019778	WDTC1	PAR-CLIP	26701625
hsa-mir-4689	MIMAT0019778	WIPF2	PAR-CLIP	23592263
hsa-mir-4739	MIMAT0019868	WNT3	PAR-CLIP	23592263
hsa-mir-4689	MIMAT0019778	WNT7B	PAR-CLIP	23592263|26701625
hsa-mir-4516	MIMAT0019053	WNT8B	PAR-CLIP	27292025
hsa-mir-3196	MIMAT0015080	WSCD1	PAR-CLIP	23592263|20371350
hsa-mir-4488	MIMAT0019022	WSCD1	PAR-CLIP	23592263|20371350
hsa-mir-1237-5p	MIMAT0022946	WSCD1	PAR-CLIP	23592263|20371350
hsa-mir-4488	MIMAT0019022	WWP2	PAR-CLIP	23592263|20371350
hsa-mir-1237-5p	MIMAT0022946	WWP2	PAR-CLIP	23592263|20371350
hsa-mir-150-3p	MIMAT0004610	XIAP	PAR-CLIP	23592263
hsa-mir-6088	MIMAT0023713	XIAP	HITS-CLIP//PAR-CLIP	23446348|23824327
hsa-mir-8069	MIMAT0030996	XPNPEP2	PAR-CLIP	23446348|22012620|20371350
hsa-mir-663a	MIMAT0003326	XPO6	PAR-CLIP	22100165
hsa-mir-3196	MIMAT0015080	XPO6	PAR-CLIP	22100165
hsa-mir-4689	MIMAT0019778	XPOT	PAR-CLIP	23592263
hsa-mir-4689	MIMAT0019778	XRCC3	PAR-CLIP	23592263
hsa-mir-4516	MIMAT0019053	YARS	PAR-CLIP	23592263
hsa-mir-6088	MIMAT0023713	YARS	PAR-CLIP	23592263
hsa-mir-8069	MIMAT0030996	YBX1	PAR-CLIP	23592263|24398324|20371350|26701625
hsa-mir-3178	MIMAT0015055	YES1	HITS-CLIP	23824327
hsa-mir-3178	MIMAT0015055	YIF1B	PAR-CLIP	27292025
hsa-mir-3178	MIMAT0015055	YIPF4	HITS-CLIP	23824327
hsa-mir-3178	MIMAT0015055	YME1L1	HITS-CLIP	23824327
hsa-mir-8069	MIMAT0030996	YOD1	PAR-CLIP	21572407
hsa-mir-150-3p	MIMAT0004610	YRDC	PAR-CLIP	23446348|26701625|27292025
hsa-mir-3663-3p	MIMAT0018085	YWHAB	PAR-CLIP	27292025
hsa-mir-6088	MIMAT0023713	YWHAB	HITS-CLIP//PAR-CLIP	22012620|21572407
hsa-mir-4516	MIMAT0019053	YWHAZ	PAR-CLIP	26701625
hsa-mir-4516	MIMAT0019053	ZADH2	PAR-CLIP	23592263
hsa-mir-4530	MIMAT0019069	ZBTB18	PAR-CLIP	20371350
hsa-mir-4739	MIMAT0019868	ZBTB34	PAR-CLIP	23592263
hsa-mir-6088	MIMAT0023713	ZBTB37	HITS-CLIP	27418678
hsa-mir-6088	MIMAT0023713	ZBTB44	HITS-CLIP//PAR-CLIP	21572407|23313552
hsa-mir-4649-5p	MIMAT0019711	ZBTB7A	PAR-CLIP	23592263|20371350|26701625
hsa-mir-3196	MIMAT0015080	ZBTB7B	PAR-CLIP	26701625
hsa-mir-4530	MIMAT0019069	ZBTB7B	PAR-CLIP	26701625
hsa-mir-3178	MIMAT0015055	ZBTB8B	HITS-CLIP	23824327|23313552
hsa-mir-4745-5p	MIMAT0019878	ZC3H11A	PAR-CLIP	24398324
hsa-mir-4689	MIMAT0019778	ZC3H4	PAR-CLIP	26701625
hsa-mir-4488	MIMAT0019022	ZC3H7B	PAR-CLIP	26701625
hsa-mir-4745-5p	MIMAT0019878	ZC3H7B	PAR-CLIP	26701625
hsa-mir-1237-5p	MIMAT0022946	ZC3H7B	PAR-CLIP	26701625
hsa-mir-4739	MIMAT0019868	ZC3HAV1L	PAR-CLIP	23592263
hsa-mir-6088	MIMAT0023713	ZC3HAV1L	PAR-CLIP	23592263
hsa-mir-663a	MIMAT0003326	ZCCHC3	PAR-CLIP	26701625
hsa-mir-3196	MIMAT0015080	ZCCHC3	PAR-CLIP	26701625
hsa-mir-3663-3p	MIMAT0018085	ZCCHC3	PAR-CLIP	26701625
hsa-mir-4689	MIMAT0019778	ZCCHC3	PAR-CLIP	24398324|23446348|21572407|26701625
hsa-mir-4739	MIMAT0019868	ZCCHC3	PAR-CLIP	24398324|23446348|20371350
hsa-mir-4649-5p	MIMAT0019711	ZDHHC5	HITS-CLIP	23824327
hsa-mir-4516	MIMAT0019053	ZFAND5	PAR-CLIP	27292025
hsa-mir-4739	MIMAT0019868	ZFHX3	PAR-CLIP	23592263
hsa-mir-4530	MIMAT0019069	ZFP30	HITS-CLIP	23824327|19536157
hsa-mir-4745-5p	MIMAT0019878	ZFP36	PAR-CLIP	23592263
hsa-mir-4739	MIMAT0019868	ZFP36L1	PAR-CLIP	24398324
hsa-mir-3663-3p	MIMAT0018085	ZFP91	HITS-CLIP	23313552
hsa-mir-4516	MIMAT0019053	ZFP91	PAR-CLIP	23592263|26701625
hsa-mir-4530	MIMAT0019069	ZFP91	HITS-CLIP	23824327
hsa-mir-6800-5p	MIMAT0027500	ZKSCAN1	HITS-CLIP	23824327
[truncated: 70 more rows]
