# Supplementary material for: Ikaros Regulates microRNA Networks in Acute Lymphoblastic Leukemia
Source: Preprints.org preprint supplement (doi:10.20944/preprints202208.0323.v1), 2022-08-17
Supplement: Supplementary file 7 [file TableS5.xlsx]

## Sheet: up miRNA KEGG
label	pval	fdr	signature	geneset	overlap	background	hits
KEGG_P53_SIGNALING_PATHWAY	4.5e-06	0.00083	1542	68	19	17387	BBC3,CCNB1,CCND1,CCND2,CCND3,CDK1,CDK2,CDK6,CDKN1A,MDM2,MDM4,RPRM,RRM2,SESN2,SFN,STEAP3,THBS1,TP53,ZMAT3
KEGG_CELL_CYCLE	3.2e-05	0.003	1542	125	26	17387	ABL1,ANAPC13,BUB3,CCNB1,CCND1,CCND2,CCND3,CDC14B,CDC23,CDC25B,CDK1,CDK2,CDK6,CDKN1A,EP300,MCM5,MDM2,ORC1,ORC4,ORC6,PLK1,SFN,TGFB1,TP53,YWHAB,YWHAZ
KEGG_PROSTATE_CANCER	8.2e-05	0.0039	1542	89	20	17387	AKT1,CCND1,CDK2,CDKN1A,CTNNB1,EP300,FGFR1,GRB2,HRAS,HSP90AB1,HSP90B1,IGF1R,IKBKG,KRAS,MAPK1,MDM2,PDGFB,PIK3CD,RAF1,TP53
KEGG_PATHWAYS_IN_CANCER	8.5e-05	0.0039	1542	325	50	17387	ABL1,AKT1,APC,BCL2L1,CCND1,CDK2,CDK6,CDKN1A,CTNNB1,EP300,FGF19,FGFR1,FOS,GRB2,HHIP,HRAS,HSP90AB1,HSP90B1,IGF1R,IKBKG,JUN,KRAS,LAMC1,MAPK1,MDM2,PDGFB,PIAS4,PIK3CD,PTCH1,RAC3,RAF1,RALBP1,RARA,RUNX1,RXRB,SLC2A1,STAT3,STK4,TGFB1,TP53,TPM3,TPR,TRAF2,TRAF3,TRAF6,VEGFA,WNT3,WNT7B,WNT8B,XIAP
KEGG_GLIOMA	0.00013	0.005	1542	65	16	17387	AKT1,CALM2,CALM3,CCND1,CDK6,CDKN1A,GRB2,HRAS,IGF1R,KRAS,MAPK1,MDM2,PDGFB,PIK3CD,RAF1,TP53
KEGG_CHRONIC_MYELOID_LEUKEMIA	0.00017	0.0054	1542	73	17	17387	ABL1,AKT1,BCL2L1,CCND1,CDK6,CDKN1A,GRB2,HRAS,IKBKG,KRAS,MAPK1,MDM2,PIK3CD,RAF1,RUNX1,TGFB1,TP53
KEGG_NEUROTROPHIN_SIGNALING_PATHWAY	0.00026	0.007	1542	126	24	17387	ABL1,AKT1,ARHGDIA,CALM2,CALM3,CSK,GRB2,HRAS,IRAK3,JUN,KRAS,MAP2K7,MAPK1,MAPK13,MAPKAPK2,NGFR,PIK3CD,RAF1,RPS6KA4,SH2B1,TP53,TRAF6,YWHAB,YWHAZ
KEGG_ACUTE_MYELOID_LEUKEMIA	0.00035	0.0082	1542	57	14	17387	AKT1,CCND1,GRB2,HRAS,IKBKG,KRAS,MAPK1,PIK3CD,PIM1,PIM2,RAF1,RARA,RUNX1,STAT3
KEGG_THYROID_CANCER	0.00065	0.013	1542	29	9	17387	CCND1,CTNNB1,HRAS,KRAS,MAPK1,RXRB,TP53,TPM3,TPR
KEGG_PANCREATIC_CANCER	0.001	0.018	1542	70	15	17387	AKT1,BCL2L1,CCND1,CDK6,IKBKG,KRAS,MAPK1,PIK3CD,RAC3,RAF1,RALBP1,STAT3,TGFB1,TP53,VEGFA
KEGG_PROGESTERONE_MEDIATED_OOCYTE_MATURATION	0.0011	0.018	1542	85	17	17387	AKT1,ANAPC13,CCNB1,CDC23,CDC25B,CDK1,CDK2,GNAI2,HSP90AB1,IGF1R,KRAS,MAPK1,MAPK13,PDE3A,PIK3CD,PLK1,RAF1
KEGG_MELANOMA	0.0012	0.018	1542	71	15	17387	AKT1,CCND1,CDK6,CDKN1A,FGF19,FGFR1,HRAS,IGF1R,KRAS,MAPK1,MDM2,PDGFB,PIK3CD,RAF1,TP53
KEGG_LYSINE_DEGRADATION	0.0013	0.018	1542	44	11	17387	AASDHPPT,ALDH1B1,ALDH9A1,DOT1L,GCDH,KMT5A,NSD1,OGDH,PLOD3,SETD1B,SETDB1
KEGG_NON_SMALL_CELL_LUNG_CANCER	0.0023	0.031	1542	54	12	17387	AKT1,CCND1,CDK6,GRB2,HRAS,KRAS,MAPK1,PIK3CD,RAF1,RXRB,STK4,TP53
KEGG_COLORECTAL_CANCER	0.0027	0.033	1542	62	13	17387	AKT1,APC,CCND1,CTNNB1,FOS,JUN,KRAS,MAPK1,PIK3CD,RAC3,RAF1,TGFB1,TP53
KEGG_BLADDER_CANCER	0.0031	0.036	1542	42	10	17387	CCND1,CDKN1A,HRAS,KRAS,MAPK1,MDM2,RAF1,THBS1,TP53,VEGFA
KEGG_MAPK_SIGNALING_PATHWAY	0.0043	0.047	1542	267	37	17387	AKT1,CACNA1B,CACNA2D3,CDC25B,DUSP14,DUSP2,DUSP7,DUSP9,ELK4,FGF19,FGFR1,FOS,GRB2,HRAS,IKBKG,JUN,JUND,KRAS,MAP2K3,MAP2K7,MAPK1,MAPK13,MAPK8IP2,MAPK8IP3,MAPKAPK2,MKNK2,NLK,PDGFB,RAC3,RAF1,RPS6KA4,SRF,STK4,TGFB1,TP53,TRAF2,TRAF6

## Sheet: down miRNA KEGG 
label	pval	fdr	signature	geneset	overlap	background	hits
KEGG_P53_SIGNALING_PATHWAY	1.6e-09	2.9e-07	3290	68	35	17387	BID,CASP3,CASP8,CASP9,CCND1,CCND2,CCNE1,CCNE2,CCNG1,CD82,CDK2,CDK4,CDK6,CDKN1A,CHEK2,CYCS,DDB2,EI24,FAS,GADD45A,IGF1,MDM2,MDM4,PIDD1,PMAIP1,PPM1D,PTEN,RRM2,SERPINB5,SESN1,STEAP3,THBS1,TNFRSF10B,TP53,TP53I3
KEGG_SMALL_CELL_LUNG_CANCER	3.8e-06	0.00035	3290	84	34	17387	AKT1,BCL2L1,CASP9,CCND1,CCNE1,CCNE2,CDK2,CDK4,CDK6,CKS1B,COL4A2,COL4A4,CYCS,E2F2,FN1,ITGA2,ITGA3,LAMA3,MYC,NFKB1,PIAS2,PIK3CB,PIK3CG,PTEN,PTGS2,PTK2,RB1,RXRA,RXRB,TP53,TRAF1,TRAF3,TRAF5,XIAP
KEGG_PATHWAYS_IN_CANCER	3.8e-05	0.0023	3290	325	91	17387	AKT1,APPL1,ARNT2,BCL2L1,BID,BMP2,CASP3,CASP8,CASP9,CBLC,CCND1,CCNE1,CCNE2,CDH1,CDK2,CDK4,CDK6,CDKN1A,CKS1B,COL4A2,COL4A4,CREBBP,CRK,CXCL8,CYCS,DVL3,E2F2,ELOB,ELOC,EP300,FAS,FASLG,FGF1,FGF23,FGF9,FGFR3,FH,FN1,FOXO1,FZD2,FZD5,FZD9,GLI2,GSK3B,GSTP1,HGF,HHIP,HSP90AA1,IGF1,IGF1R,ITGA2,ITGA3,JUN,LAMA3,MAPK1,MDM2,MMP9,MYC,NFKB1,PDGFA,PDGFB,PDGFRA,PIAS2,PIK3CB,PIK3CG,PLCG2,PRKCA,PRKCB,PTEN,PTGS2,PTK2,RAD…
KEGG_CELL_CYCLE	0.00015	0.0069	3290	125	41	17387	ANAPC1,ANAPC13,CCND1,CCND2,CCNE1,CCNE2,CDC14B,CDC25B,CDK2,CDK4,CDK6,CDKN1A,CDKN2D,CHEK2,CREBBP,E2F2,EP300,ESPL1,GADD45A,GSK3B,MAD2L1,MCM3,MDM2,MYC,ORC1,ORC6,PCNA,PKMYT1,PLK1,RB1,SMC1A,STAG1,TFDP2,TP53,TTK,WEE1,YWHAB,YWHAE,YWHAG,YWHAQ,YWHAZ
KEGG_HOMOLOGOUS_RECOMBINATION	0.0002	0.0075	3290	28	14	17387	MRE11,POLD1,POLD3,POLD4,RAD50,RAD51,RAD51C,RAD51D,RAD54L,RPA1,RPA3,SEM1,TOP3A,XRCC2
KEGG_DNA_REPLICATION	0.0014	0.042	3290	36	15	17387	DNA2,LIG1,MCM3,PCNA,POLA1,POLD1,POLD3,POLD4,POLE3,PRIM1,PRIM2,RFC2,RNASEH1,RPA1,RPA3
KEGG_PYRIMIDINE_METABOLISM	0.0018	0.047	3290	98	31	17387	CAD,CMPK1,CTPS1,DCK,DCTD,DHODH,DUT,ENTPD5,NME4,NME5,NME6,NT5C2,POLA1,POLD1,POLD3,POLD4,POLE3,POLR2D,POLR2E,POLR2F,POLR2G,POLR2H,POLR3D,POLR3G,PRIM1,PRIM2,RRM1,RRM2,TK1,TXNRD1,TYMS
