# Supplementary material for: Ikaros Regulates microRNA Networks in Acute Lymphoblastic Leukemia
Source: Preprints.org preprint supplement (doi:10.20944/preprints202208.0323.v1), 2022-08-17
Supplement: Supplementary file 9 [file TableS6.xlsx]

## Sheet: Table S6
Table S6: Non-overlapping miRTarBase target genes of IK1 regulated DE miRNAs
Non-overlapping target genes of IK1 downregulated miRNAs	Non-overlapping target genes of IK1 upregulated miRNAs
ACTA1	ABL1
AHR	APC
AK4	RHOB
AMD1	ARHGDIA
AMPD2	CALR
FASLG	CDK1
ARCN1	CDH7
BACH1	CEBPB
POLR3D	CLCN7
RUNX1T1	CSK
CCNG1	EEF1A2
CCNT2	CTTN
CD59	FOSB
CDC5L	GMDS
CDH18	GNAI2
AP1S1	SFN
CLTC	GPR20
COL6A1	GRB2
COL8A1	H2AFX
CREBBP	HOXB8
CRK	HRAS
CRY2	HSPG2
CTPS1	IDE
CYP2B6	JUNB
DHX15	JUND
DIAPH1	MNT
DNAH9	NEUROD2
ARID3A	NRGN
DSP	PIK3CD
DTNB	POU3F1
DUSP1	SBF1
DVL3	SEMA3F
E2F6	SKI
EIF4A1	SLC1A2
EIF4G2	FSCN1
ENSA	TGFB1
EPHA4	VASP
EZH2	VGF
FDPS	ZNF154
FMO4	MAFK
GABPB1	SLC7A5
NR6A1	DPF1
GNG5	RGS5
GOLGA4	KHSRP
GPM6B	PSMG1
GTF2I	PLOD3
HIST1H2BD	RAB11B
HLA-C	KLF4
HMGB1	MICAL2
HNRNPC	ZNF516
NDST1	MYL9
IGF1	TOMM40
IL6R	TACC3
CXCL8	XPO6
ITGA3	VPS8
IVD	WBP2
KPNA5	ZNF385A
RPSA	PACSIN1
LMNA	STMN3
LYN	SDF4
MXD1	PIAS4
MAGEA3	PCSK4
MAGEA6	GATAD2A
MAGEA12	KIAA1551
MKI67	SLC47A1
MMP9	NKRF
MPL	BARHL1
ATP6	ARHGAP31
COX1	PDZD4
COX3	VPS18
ND1	PRX
ND2	ATL2
ND3	GIGYF1
ND4	RTN4R
ND5	MRPL44
MYC	CENPO
MYCN	THSD4
MYO9B	C10orf95
NAP1L1	PGAP1
NCBP1	C3orf36
NDUFA3	SRCIN1
NDUFS5	ARHGAP39
NF1	PDRG1
NME4	SPRY4
SLC11A2	MARVELD1
NUCB2	DDI2
OPRL1	AKT1S1
PA2G4	UNK
PAFAH2	SIGLEC12
PAX3	MYADM
PCBP2	MTSS1L
GATB	SCAMP4
PGD	EVI5L
PHKA1	ZNF787
PLCG2	ARL8A
PMAIP1	PTCHD1
POLD1	ASB6
POLR2D	KDELC2
CTSA	PTGR2
PPP1R2	AFG1L
PPP1R10	NPW
PPP2R1A	INO80E
PRIM2	FAM83H
MAPK6	LHFPL3
PSMA6	HRNR
PSMD2	KLLN
PTK2	CENPCP1
PYCR1	CTNNB1
QDPR	EMP1
RANBP2	MKNK2
RAP1A	CD46
RBBP4	MYB
RBM4	RPL11
RDX	GCFC2
RFC2	STXBP5L
RHD	DAZAP2
RPA1	ANKS1A
RPL10	ITGB3BP
RPL12	INTU
RPL27A	TMEM138
RPLP2	LRRC1
MRPL12	DENND4C
RPN2	DHX33
RRAD	MRS2
RRM1	MRPS25
MSMO1	YRDC
ATXN2	VMP1
SKIV2L	SRXN1
SLC12A4	BTLA
SLC20A1	POU3F3
SPN	ARHGEF18
SPTBN1	AMH
SQLE	CSTF1
SREBF1	FXYD1
SSB	PTGIS
STAT2	RPL24
STRN	STX4
STX3	TAF1
SUOX	TULP1
SUPT4H1	YES1
SURF4	MALL
SVIL	ATP6V0E1
VAMP2	RPL14
SYT1	WDR1
TCF4	YME1L1
TERF1	CPLX1
TGFBR3	CDC37
TIMP3	BVES
TNFAIP3	IRAK3
TNFRSF1A	U2AF2
TXNRD1	MAST3
UBE2H	KDM6B
VARS	SEPT6
TRPV1	SRPX2
WNT1	BAZ2B
YWHAE	ZNF107
YWHAG	ELP2
ZNF8	RBM22
ZNF28	SLC12A5
ZNF200	ZNF490
ZNF236	KIAA1456
LUZP1	EPG5
PRRC2A	ULBP3
STAM	NOL9
MLLT10	MPIG6B
HMGA2	PTDSS2
COIL	HOOK3
SMC1A	YIF1B
ARID1A	MBOAT1
TRRAP	CCDC122
FZD9	SVIP
DYRK3	TMEM105
DYRK2	CEP57L1
IRS4	PEAK3
SOCS1	DENND6B
IRS2	KIAA0754
EIF3J	ASCL2
TNFSF9	VPS51
TNFRSF10B	RUNX3
GMPS	ENG
SLC5A6	KCNK3
MBD2	LSP1
BTRC	MELTF
WASL	MSI1
BAZ1B	MYOD1
SPAG9	OLR1
CLDN12	PITX3
ATG12	MTA1
AURKB	MSC
TIAF1	MAPKAPK2
NOLC1	SPATA2
ATP6V1F	ATG2A
PPIG	MAPK8IP3
HAND1	WSCD1
ONECUT2	LEPROTL1
ATP6V1G1	MAPK8IP2
NUP155	BHMT2
MTFR1	SLITRK5
CEP135	GMEB2
VGLL4	MINK1
KIAA0391	ZBTB7B
ESPL1	RASD1
KIAA0100	NDE1
HERPUD1	ST7L
KIAA0355	PCDHB2
SETD1A	LYRM4
EIF4A3	SALL4
MATR3	CBX8
SNX17	SLC9A7
SPCS2	SESTD1
TSC22D2	BICDL1
UBAP2L	CASP16P
ARNT2	SLC39A11
ZBTB5	FOXK1
RBM8A	RSBN1L
SUGP2	CBARP
SERF2	BCL9L
ZNF256	NANOS1
LHFPL2	SHISA2
ZNF443	C10orf55
AKAP8	UQCC3
KATNB1	APOA1
TUBA1B	DDR1
TUBB4B	CCT6A
RBM14	EREG
LRRC41	ID3
CARM1	LFNG
SEMA4B	RPL22
PRPF8	SLC5A2
TGOLN2	SLC6A8
ARID3B	SLC16A1
IGF2BP1	TPR
IGF2BP3	TRIM25
CELF1	CDC23
CELF2	SNAP29
SLC12A7	GOSR1
RAI2	RNF41
WDR4	AAK1
PGRMC1	BBC3
SUB1	DCXR
YWHAQ	FAM53C
HNRNPUL1	RNF138
RABL2B	ASXL2
RABL2A	CSGALNACT1
SEC23IP	CAND1
CA5B	CDC42SE1
ATXN2L	MAN1C1
COPG1	KCTD15
RNF44	ZFP91
FNDC3A	FAM234A
DZIP1	PCBD2
SCMH1	DOT1L
PDCD11	ANKRD13A
WDFY3	R3HDM4
DAAM1	KLHDC3
MCF2L2	BBS5
PLXND1	DIRAS1
GGA3	JAKMIP3
TTLL12	GAS2L3
PSME4	TGFBR3L
PMPCA	ACVRL1
PACS2	BCL7A
PSD3	CALM3
MED13L	CLU
TDRD7	CS
CBX5	EFNB1
PES1	FARSA
MACF1	GNB2
SUZ12	NPBWR1
RBFOX2	MEN1
PIGN	MSN
MTCH2	MYH11
BRI3	NF2
NOCT	NFIX
ARIH1	PAX2
INTS7	PRSS8
APPL1	SARS
CHTOP	TFAP4
RSL1D1	DDX39B
FBXW2	HS6ST1
AGO1	ARPC1B
SALL3	EIF1
DISC1	NDRG1
POLL	CERS1
SGSM3	WWP2
SLCO4A1	ZC3H7B
C19orf53	SMOX
CCDC113	MAP1S
GTPBP8	WDR45B
THYN1	FBRS
RACGAP1	ELOF1
ABT1	G6PC3
CCDC106	ARHGAP18
ERO1A	ANKLE1
DCAF8	MIB2
SHANK1	EIF5AL1
TMED5	SIK1
MRPS2	CCDC71L
NAA20	QSOX2
RNFT1	TBC1D28
PLEKHO1	CTXN1
CPA4	ARGFX
COX16	RUNX1
THEM6	CCNF
RWDD1	FANCA
CWC15	NAB2
NCKIPSD	NPY4R
LSR	PRPS1
SLC38A2	UGT8
MIEF1	VEGFA
FAM105A	RAB9A
MARCH5	IRX5
SEMA4C	BPNT1
PARP16	APPBP2
ZNF770	CD226
USP47	ATP1B4
BSDC1	SH2B1
FIGN	MTPAP
VPS13D	TMEM33
ARL8B	RAB22A
C11orf57	TBC1D24
SLC38A7	FBXL18
NUDT15	ATP13A4
TBC1D19	HIST1H2AH
SYNJ2BP	SP140L
PLCXD1	CAMK2N2
CDV3	C10orf71
KIF27	FAM83C
BMP2K	CCNY
OTUD5	PRPS1L1
KRBOX4	C8orf82
CHD7	PPAN-P2RY11
HIF1AN	ALDH9A1
RABL6	APLP2
IPO9	ABCC6
FAM222B	CANX
RCOR3	CCNT1
TXLNG	CRMP1
DCAF6	DUSP9
USE1	PHC2
ECHDC1	FUS
ZKSCAN7	GATA6
LRRC8A	GMFB
DIABLO	HAL
SAR1A	HLA-DRB5
UGGT1	HMGN2
STARD7	HNRNPU
SMARCAD1	HOXA3
NCLN	IDH3A
YAE1D1	IGFBP5
C12orf4	KCNH2
FAM219B	LIMK1
SCYL1	M6PR
RHBDD2	MAF
KIAA1143	MAP2
MTUS1	MECP2
KIAA1328	NID1
PDP2	ORC4
BAHCC1	PTPA
WDR48	PRKCH
USP37	MAPK13
FAM160B1	PSMD11
IGDCC4	RAC3
ABHD17C	REST
THADA	SLC4A2
RRAGC	SOX4
MTMR14	TAF7
NOM1	TAF12
SMAP2	TPM2
RMND5A	HSP90B1
NT5DC2	TRAF6
MARCKSL1	UBE2G1
SLC2A11	WNT8B
RNF26	ZNF12
EFHD2	PABPN1
ADIPOR2	KDM5C
RHBDF2	YARS
LIN28A	SCARF1
AGMAT	KLF7
ALG13	KCNK5
NAA60	HRK
NRSN2	MTMR1
CTC1	MBD4
CHD9	SYT7
OPA3	FXR2
EDEM3	HS2ST1
LIMD2	TMEM63A
COLEC12	SERTAD2
RCC1L	LRIG2
C1orf21	SETDB1
ZNF611	GFPT2
CDCA3	DCAF7
DNAL1	MYL12A
HASPIN	FSTL4
EMILIN2	FBXW11
KATNAL1	NCAPH
TOMM40L	SIPA1L1
UTP15	NAT9
ZNF644	TJP3
NOA1	PALD1
TMEM107	TNFRSF21
RAB11FIP4	NKIRAS2
USP38	ING4
FUT10	AIG1
C19orf48	GPR173
ZNF587	ELP6
PPP1R15B	ALKBH5
FAM104A	RBM23
FBXL20	SBNO1
ARHGAP19	RBM38
COX14	MAP7D1
HIST1H2BK	RPRM
LMLN	OTUD7B
HS6ST2	NLGN2
CCDC97	USP36
ZNF799	SENP2
DHX57	BACH2
ANKRD40	NXN
TIMM50	MARCH1
MARS2	MTHFSD
SDR42E1	FAM129B
ZFAND4	ELOVL6
TBC1D31	TBL1XR1
PIGS	PTCD2
PDZD8	ZNF34
LRIG3	TRIM56
AEBP2	SLF1
NAA30	SPRYD3
MSI2	RAB2B
ZFP3	NUDCD2
IRGQ	SAMD10
DCBLD2	C14orf144
UROC1	CMTM4
GRPEL2	CCDC80
PM20D2	KIAA1958
UBXN2B	UBXN2A
BRI3BP	SIAH3
SMCR8	GPR137C
ZNF578	ZADH2
ZNF417	DPY19L4
ZNF738	LURAP1L
C1orf210	POTED
DTX3L	GPIHBP1
CEP120	SPOPL
ANKRD46	SLC10A6
PAPD4	LCE1B
KLHDC8B	C2orf82
ZNF584	MINOS1
PDE12	AGAP9
HIPK1	GOLGA8J
JMJD1C	GOLGA8M
SPATA13	GOLGA8H
JAZF1	FOXO6
TMED4	CAPN5
NUDT8	C8A
MFSD8	CALM2
KCTD21	CD3D
C5orf51	NCAN
ZBTB8OS	DMPK
NAT8L	DUSP2
ACER2	EPOR
MS4A10	FGFR1
ZNF284	FOS
MTX3	FUT4
SKA2	GRID1
NDUFA4P1	MNX1
NHLRC2	HSP90AB1
NHLRC3	KIFC1
ZNF805	BCAM
PRAMEF13	MVK
RAB19	PCDH7
POTEG	PTCH1
FNDC9	PTPRF
HIST2H2BF	SCN4B
PRR5-ARHGAP8	SP1
POTEM	TAPBP
ZFP62	TRAF2
FAM83G	ZNF208
FOXD4L6	TRADD
C11orf91	SLC7A7
NAT1	IER2
ABCA1	FAM131B
ABCF1	SUGT1
ACADM	LMTK2
ACADS	MPRIP
ACADSB	KIAA0895
ADARB1	NCS1
ADM	BCL2L13
PARP4	FJX1
ADRA2A	PARS2
GRK2	AATF
AGL	TRUB2
JAG1	GPR132
AGT	RSRC1
AGTR1	ETV7
ABCD1	C9orf78
ANXA1	FAM193B
ANXA3	RPP25
ANXA5	KIF26B
AOX1	SLC39A9
APOF	LRRC47
ARF1	SHROOM3
ARRB1	MIER1
ASNA1	SFMBT2
ASNS	HES4
ATF3	CCDC14
ATP1A1	TXNDC5
ATP1A3	TRAF7
ATP2A2	EIF1AD
ATP2B1	MRPL45
ATP7B	LCOR
AUP1	RNFT2
NKX3-2	NLRP12
BCHE	PRRT2
BCL3	BTBD9
BGLAP	GPR146
BID	B3GAT2
BLVRB	TMEM199
BNC1	RNF217
BMP2	DZIP1L
BMP8B	SLC36A1
BMPR1A	MYLK4
BMPR2	CATSPER4
BRCA1	C2orf71
BRDT	VHLL
BTG1	PGAM4
C1QB	LRTM2
C5AR1	SLFN12L
ZNHIT2	ARHGAP19-SLIT1
TMEM50B	APOC3
CA1	BMP3
CA2	CCNB1
CA9	IFNAR2
CA11	KCNN3
CACNA1S	KIF5B
CACNB2	CHST6
CACNB4	MCM5
CAD	MTHFD1
CAMK4	PIGR
CASP3	RPS19
CASP4	SRP54
CASP7	THY1
CASP8	UBC
CASP9	ZNF43
CASQ1	ZNF282
CAV1	PAICS
CAV2	FUT9
SERPINH1	RNPS1
CCNE1	PXMP4
CD28	MRPS27
CD36	AP4E1
SEPT7	RPL13A
CDH1	ZDHHC5
CDH5	TRAF3IP1
CDH9	C5AR2
CDK9	SNX11
CDKN2D	HP1BP3
RCBTB2	ZBTB7A
CHM	ANKFY1
CISH	POLR3K
ERCC8	RBM28
CKS2	MRPS10
CLIC2	FAM234B
CLTA	PDF
CNTFR	HERPUD2
COL1A2	QTRT2
COL4A2	CHRFAM7A
COL4A4	ZNF835
COL4A5	ZNF101
COL12A1	GLB1L3
COL15A1	TSPEAR-AS2
SLC31A1	ZNF543
COX8A	LIX1L
CPA1	C6orf141
CPB2	STK35
CPN2	SPC24
CRIP2	B3GALNT2
CRYAA	OLFML2A
CRYGC	AAED1
CRYZ	MTURN
CSN3	DEFB105A
CSNK1A1	PPIL6
CST2	LIN9
CST3	ZNF850
CSTF2	LANCL3
CTGF	ZYG11A
CTH	DEFB105B
CTNS	NME1-NME2
CTSD	ADK
CTSV	DAO
CTSZ	F2
CXADR	FDX1
CYLC2	GPX1
CYP2D7	HIST1H1E
CYP2D6	ID4
CYP2F1	ITPKB
CYP4A11	NPTX1
CYP11B2	PRPSAP1
CYP24A1	SNCG
CYP27B1	UBE2D2
DAB2	BAP1
CD55	SRSF9
DCTD	CHST3
DDB2	RIPOR2
GADD45A	RUSC2
DDX6	B4GALT7
DEFA1	EXOSC2
DEFA3	IPCEF1
DEFB4A	NTMT1
DFNA5	SPA17
DHODH	PNRC2
DPYSL3	BDP1
DRD3	ZMAT1
DSC1	LMNB2
SLC26A2	EDARADD
DUT	TMEM120B
DYRK1A	ZNF785
GPR183	PPM1N
ECH1	METTL27
ECT2	INAFM1
EDN2	HKR1
EEF1A1	DRAXIN
EFNA2	PLIN5
EFNA4	ALDH1A3
MEGF8	AZF1
EGR3	CACNA1B
EIF1AX	CELSR2
EIF2B1	ELF3
EPHA2	EMX1
EIF5	FLOT2
SERPINB1	HLA-DRA
ELAVL2	HMGB3
ELAVL3	HMGCS1
ELF4	HOXB5
EMP3	HOXC13
ENDOG	IHH
EPHX1	KRAS
ETF1	LNPEP
ETV4	TLE3
EVI2A	UBE2V1
EXT2	KDM6A
F3	WNT7B
F13B	XRCC3
FANCC	SF1
ACSL3	ZNF99
FCGR1B	ADAM12
FKTN	HIST1H4C
FCN2	STC2
FDFT1	TSC22D1
FDXR	VNN1
GPC4	CLDN1
FES	SLC9A3R1
FGF9	CTIF
FGFR3	SEC16A
FH	SLC23A1
VEGFD	MRVI1
FKBP1B	PGRMC2
FKBP2	XPOT
FOXG1	ZNF507
FOXF2	WDTC1
FOXE1	NMNAT2
FOXM1	ESYT1
FOXD2	RRP8
FMO3	RASD2
FN1	CLIC4
FOLH1	GAPVD1
FOLR2	BSCL2
FTH1	C16orf72
FUT8	ZNF117
G6PD	TMBIM4
GABBR1	TRMT10C
GABRA3	C1orf109
GABRB3	OXR1
GABRE	SLC38A4
GABRG3	KLHL11
GALK1	CAMK2N1
GALNT3	FEM1C
GALT	EDA2R
GAS2	NPVF
GATA4	ZMAT3
GBP2	C16orf58
GCH1	C6orf106
GCNT2	TRIR
GDF10	SH3TC2
GEM	SLC25A22
GHSR	CHCHD5
GJA5	PPP1R9B
GLI2	UNC119B
GLRX	S100A16
GNB3	CKAP2L
GNRHR	METTL21A
GP1BB	TCEANC
GPR1	ANKS6
GPR17	ATXN1L
GPR22	LCE1A
GPR27	SLCO4C1
MLNR	TMEM189
GPR39	TMEM189-UBE2V1
GPX4	IL17REL
GRB7	METTL12
GRB14	AK2
GRIK2	ARSA
GRM8	ZFHX3
GSK3B	ATP2A3
GSR	ATP6V1B1
GSTA1	ZFP36L1
GSTP1	CAPN1
GSTT2	CCND3
GTF2A1	CFL1
GTF2A2	AP2M1
GUSB	CYLD
GYS1	SLC29A1
HIST1H1D	FAAH
HAGH	FKBP5
HADH	GCDH
HAS2	GNG3
HTT	HDLBP
HEXB	SLC29A2
HGD	HPCAL1
HGF	LASP1
UBE2K	LY6H
HLA-DQB2	MAG
HMOX1	MAT1A
TLX1	CIITA
HOXA9	MLLT1
HOXB1	NBL1
HOXB7	SEPT2
HOXC4	NGFR
HSD3B1	NRF1
HSD11B1	TBC1D25
HSD17B2	OGDH
HSF1	PAX5
HSF2	PCYT1A
HSF4	PGAM1
HSPA1L	PLXNA1
HSPA4	RARA
HSPA8	RTKN
IGSF3	CCL11
HSPD1	CXCL5
IAPP	SDC4
IBSP	SIX3
MRPL58	SOAT1
ID1	CAPN15
IDH2	SP2
IDI1	SRP19
CFI	NEK4
IFI16	THRA
IFNG	UBE2D3
IFNGR2	UCP2
IGF2R	NR1H2
CYR61	WNT3
IGHMBP2	RAB7A
IL3	ELL
IL7R	UBL4A
CXCR1	IKBKG
IL12A	AKR7A2
IL13RA2	SNAP23
IMPG1	AIP
ING2	HGS
INHA	GTF3C3
INPP5A	NTN1
INPP5B	IP6K1
INPP5D	HMGXB4
INSL4	ACTR2
INSR	CTDSP2
IRF4	SCML2
ITGA2	HOXB13
ITGAX	NFAT5
ITGB2	GIPC1
JARID2	TOB2
KCNF1	PNPLA6
KCNN2	STARD3
KCNQ2	KIF2C
KHK	AKAP11
KIFC3	PHB2
KLRC1	ITGA11
KLRC2	ADGRL1
KPNA2	RPH3A
KRT4	RALY
KRT8	IQSEC2
KRT18	DDN
KRT32	CLUH
L1CAM	CLASP1
LAMA3	POFUT1
LCAT	FKBP8
LETM1	LETMD1
LIF	SPEF1
LIG1	DESI1
LIG4	SSU72
PRICKLE3	APH1A
LOXL2	TMEM216
LRP4	KLF13
LRPAP1	GNB1L
LSAMP	PDPR
LTA4H	BRIX1
MAD2L1	LRRC59
SMAD1	HES6
SMAD6	TMEM127
SMAD7	TMEM63C
MAFG	HACE1
MAGEA9	SH3RF1
MAGEA11	LSM2
MAN2A1	RBSN
MAP1B	AGXT2
MATN3	DDA1
MB	RETREG2
MCC	MYH14
MCM3	LONRF3
MDH1	PTGES2
MEF2C	DCAF11
RAB8A	TMPRSS5
MEP1A	SESN2
MGP	GLYR1
CXCL9	CBX2
TRPM1	ZNF496
MME	CHRDL1
MMP8	MRRF
MMP10	ELFN2
ALDH6A1	C1QTNF6
MNAT1	SLC26A9
MNDA	C20orf96
MPI	C11orf84
MPV17	KRT80
MT1M	NRG4
COX2	SLC30A7
MTCP1	VPS37D
MTX1	ASXL1
MUC7	PGAM5
MVD	VSTM4
MXI1	NBPF11
MYBPC1	TMEM184A
MYOG	ADGRF2
HNRNPM	SLC29A4
NCAM2	CNOT6L
NDUFA1	CFAP65
NDUFA5	DUSP28
NDUFB1	ANKRD45
NDUFB4	ZNF710
NDUFB5	SFT2D2
NDUFS8	SLC27A1
NFE2L2	SLC6A17
NFKB1	ZBTB34
NFKBIE	MXRA7
NKX2-2	TRIM67
NOP2	TSPAN11
CNOT4	POLR2J3
NRDC	FAM198A
NSF	UPK3BL1
NVL	MINOS1-NBL1
OAZ2	ECE1
ODF2	EFNA3
OTC	EIF5A
OXA1L	ELK4
OXCT1	GNL1
P2RY6	GRK5
SERPINB2	IDS
PAK1	LAMC1
PRKN	LRP3
PBX3	MYH9
PCCA	PFKFB2
PCCB	PKM
PCK1	PPIB
PCNA	MAP2K3
PCNT	SH3GL1
PCSK1	SNRPA1
CDK18	SRD5A1
PDE4B	TFPI
PDGFRA	UBTF
PDGFRL	ZFP36
PDHA2	HIST1H2BG
PDK1	HIST1H2BL
PDK4	HIST1H2BE
SLC26A4	HIST1H2BO
PFDN5	HIST1H3C
PFKFB3	DNAH17
PFKP	TNFRSF10A
PFN2	LDB1
PHKA2	RPS6KA4
SERPINB5	EFTUD2
SERPINI2	GRAP2
PIGA	SEC24C
PIK3CG	BCL2L11
PKD2	TRIM28
PLAG1	PNMA2
PLCB2	RALBP1
PLCB4	LYPLA2
PLOD2	SIT1
PLS1	SNX24
PNOC	CARD10
PMP22	GPRC5B
PNMT	CDCA4
UBL3	MRPS18A
PODXL	RNF121
POLA1	NCBP3
POLG	UBE2Q1
POLR2G	NPLOC4
POLR2H	SELENON
POU2F1	TMEM135
POU4F1	UBE2Z
POU4F3	RNASEH2B
PPAT	SRD5A3
PPP1CC	NIPA2
PPP2R5D	BCL2L12
PPP3R1	TMEM67
PPT1	TCHHL1
SRGN	MIER3
PRKAA1	IBA57
PKIA	TPCN2
PRKCD	LRIT3
PKN1	TXNRD3NB
PRKX	KIAA0895L
PRPS2	ABAT
LGMN	AIRE
HTRA1	CASP5
PSMB7	DBT
PSMB8	EPB42
PSMC1	IL10RB
PSMC4	KCNJ3
PSMC6	NFYB
PSMD5	NOS1
PSMD7	NUCB1
PSME1	OAS3
PTEN	PPP2R5E
PTGS2	KLK10
PTPN1	BRD2
PTPRJ	SMARCD2
PTPRO	STAR
PVALB	TERT
ABCD4	TULP3
QARS	UCK2
RAB3A	ZNF708
RAB27A	GLRA3
RABGGTA	SLC25A16
RAD51C	SGPL1
RAD51D	SKAP2
RAP1B	LRAT
RASGRF1	ADAMTS4
RB1	SPTLC2
RBM3	SECISBP2L
RBMY1HP	JAKMIP2
RCN2	SLC30A9
RECQL	C1orf61
RELB	DCTN6
RGS3	NCKAP1
RLF	LILRB1
RNASE1	RER1
RNASE6	POLR3A
RNF2	KAT7
RNF6	NUDT3
ROM1	ZNF277
RORB	GGA2
RORC	METAP1
ROS1	HAAO
RPA3	PGLS
RPL6	MYCBP
RPL37	ZBTB44
RPL39	DNTTIP2
RPLP1	TMEM214
RPN1	SLC35F6
RPS6KB2	TTC38
RYR3	PNPO
S100A1	ELMOD1
S100A2	FGD6
S100A7	STOX2
S100P	TAF1D
SAFB	GLB1L
SCN2A	NUBPL
SCP2	TTYH3
CCL2	APOL6
CCL7	VOPP1
CXCL6	CSRNP2
SDHB	RAB33B
MAP2K4	USP42
SFPQ	MYPN
SFRP4	PRRC2B
SH3GL2	ZNF607
SI	PPIL4
SIX1	BTF3L4
SKIL	PLCD3
SLAMF1	SLC25A25
SLC1A6	AGAP1
SLC3A2	ANKRD9
SLC5A3	ZNF440
SLC6A9	SWSAP1
SMARCE1	SLC2A14
SMN1	RUNDC1
SMN2	C2orf15
SMS	FAM120AOS
SNAI1	CREG2
SNRNP70	NAPEPLD
SNRPC	MCOLN2
SNRPN	ANKS4B
SOX3	GXYLT1
SOX5	ZNF429
SP4	ENO4
SPAG1	CLEC17A
SPRR1A	FAM102A
SRP9	PRR23A
SRP14	ZNF878
SRPRA	APEX1
SSR1	MDK
STAT6	PKD1
HSPA13	RAF1
STXBP3	LIPG
SUPT5H	KMT2B
MED22	RNF40
VAMP7	FSTL3
TAC3	IPO7
ADAM17	STIP1
TAF4B	MTG2
TAF9	HBP1
TAF13	VPS4A
TARBP2	UBQLN4
TAZ	CCDC121
TCF12	GLIS2
TCN1	TMEM91
TCTA	ACVR2B
TEAD3	C6
TERF2	CAPN6
TESK1	TAF11
TGFB1I1	AOC3
TGFBI	BUB3
TGM1	FOXJ3
TIA1	NUP62
TK1	ABHD12
ICAM5	ERGIC2
TLE4	NLK
TLR1	IMPACT
TLR4	TNIP2
NR2E1	PUS3
TNP2	TBRG1
TOP1	ZNF585B
TOP2B	TMEM170A
TPD52L2	COX18
TPMT	IFNAR1
TPO	KCNH1
NR2C2	LDLR
TRAF1	RGS12
TRAF5	VDR
TRIP6	CDS2
TRPC4	RPH3AL
TRPS1	PLEKHM1
TSHB	TOMM70
PHLDA2	FGF19
TSTA3	ARC
TTK	COMMD5
TUB	CPNE5
TULP2	FN3K
TXK	FLYWCH1
TYMS	FIBCD1
UBB	TEX261
UBE2E1	SLC22A12
UGDH	ZNF488
UQCRC2	C8orf58
VAV1	ANKRD33B
VCP	ARF6
VIM	ASPH
VPREB1	FUT1
VTN	YBX1
WARS	TPD52L1
WNT5A	XPNPEP2
WRB	SQSTM1
XDH	TBC1D4
XK	HHLA1
XRCC2	BTG3
XRCC5	PPP1R16B
ZFY	MOCS3
ZNF23	ZNF853
ZNF35	UBA6
ZBTB25	MBNL3
ZNF133	ZMIZ1
ZNF136	KIAA1586
ZNF140	INIP
ZNF141	AASDHPPT
ZNF195	BCL2L14
ZNF207	HOPX
MAP3K12	RAB3C
PTP4A1	MOB3A
IL1R2	RICTOR
FZD5	GSTK1
IFRD2	TMPPE
MANF
SLBP
ST8SIA4
NELFE
TFEB
MTERF1
SEM1
ARHGEF5
TUSC3
NR4A3
BRD3
SHOC2
PDHX
FGF23
ALX1
DPF3
ST8SIA2
USP9X
TMEM187
KDM5D
KLRC4
ACOX2
HIST1H2BI
HIST1H2BC
HIST2H4A
NME5
SRPX
UXT
NR0B2
RAD54L
NSMAF
SUPT3H
RAE1
OFD1
GALR3
MAP4K3
PPM1D
ELP1
DGKZ
MADD
MKNK1
STK16
LY6D
RGS20
RUVBL1
PLPP1
RNASET2
TNKS
DGAT1
B3GALT1
EED
CRADD
TNFSF10
ADAM18
ADAM9
MPDZ
TNFRSF11A
PEX11A
CREG1
GALR2
DPM1
GGH
WISP3
KAT2B
CDK5R1
PER3
VNN2
NAE1
BUD31
SNURF
SELENBP1
CDKL2
CH25H
BRSK2
PSTPIP2
PIAS2
LDB2
PRY
EIF1AY
DNAJA3
USP14
USP6
ATP6V0D1
PDLIM1
AIFM1
SLC28A1
DGKI
COX7A2L
IL1RL1
ZBED1
CRLF1
MFHAS1
CYTH1
BCL7B
SOCS6
LONP1
SLC22A8
COX5A
SLC22A13
CIAO1
FADS2
ABCG2
MED23
EIF2AK3
ITM2A
FHL5
RASAL2
AKAP5
ADAMTS1
GAL3ST1
MPDU1
BAG3
ZNF254
EI24
TP53I3
C14orf2
CLOCK
CYTIP
RAB36
PLCH2
IPO13
SDC3
SLC25A44
KDM4A
CLINT1
GREB1
UBE3C
TRAM2
ST18
ULK2
AQR
CCDC144A
KIAA0408
TOX
PCLAF
BCLAF1
KIAA0232
RNF144A
EFCAB14
URB2
KEAP1
ARMCX2
DNAJC6
GINS1
ZBTB24
TRANK1
SNAP91
FIG4
SV2B
KLHL21
RBM19
G3BP2
TMCC2
ARHGAP44
FAM20B
JOSD1
OXSR1
USP3
TNFSF15
NUP153
CLEC2B
SCO2
HDAC5
SH2B3
CHAF1A
SMC4
ABCB6
PQBP1
ARPC5
TSPAN3
NUBP2
TSFM
ARL4A
DNAL4
NAMPT
ARFRP1
TOB1
PLXNC1
ATP6AP2
FARP1
WASF2
CHST4
TSHZ1
ALG3
TRIM13
GDF11
TRIB1
LRRC17
SPRY1
SPRY2
IGSF6
STUB1
STAG1
NET1
PRSS16
SMNDC1
DNAJA2
SNAPC5
B3GALT5
IKZF1
TRIM22
CACNG3
BTN3A3
NSA2
YAP1
CDIPT
C1D
ACAA2
TAB1
GPNMB
ZNHIT1
TADA3
MYBBP1A
FBLN5
CIB1
CHERP
BATF
SLC19A2
IFI44
CXCL13
SLC34A2
MTHFS
SLCO1B1
POLR3G
NPRL2
SCGB1D2
SCGB1D1
CXCR6
GNA13
CSPG5
GNB5
CNPY3
NUDC
KIF1C
CAPN9
POP4
ARPP19
FRS3
FAM114A2
CCL27
HPSE
USP20
FGL2
YIF1A
BRD8
TRAFD1
SMPDL3A
EHD1
UGT2A1
AP3M2
HNRNPA0
PDIA5
PNRC1
RAB40B
EBNA1BP2
UQCR11
RAB32
CCNI
METAP2
SF3B2
TMSB15A
LIAS
SLC35D2
ABHD2
CNTRL
CYB561D2
RAPGEF4
TPPP
TRIOBP
DNAJB4
ADAM29
FAF1
KIF3A
ZWINT
HHLA3
FICD
FSTL1
WDHD1
SLC2A6
CHEK2
PDCD10
RNF24
PMF1
NXPH4
SLC6A14
DCTN3
DUSP12
PRR4
USP18
CYP4F8
PNKP
PARK7
FKBP9
RRAS2
PHLDA1
DLGAP4
NTNG1
BAHD1
DIS3
DHX30
SACM1L
RAB3GAP1
P2RX2
SORCS3
KLHDC10
TMCC1
PHLPP2
MYT1L
KIF21B
ERC1
ZNF423
KIF1B
CDK19
TBC1D2B
RAD54L2
EPB41L3
RTF1
DIP2A
MESD
RRS1
FBXO28
SYNE2
EXOC6B
TMEM131L
KIAA1024
ADGRL2
DNMBP
KIAA1107
AGTPBP1
SMG6
DMXL2
WASHC4
DPY19L1
SYNE1
PHF24
UBR4
SUN1
TNS2
ICE1
SPECC1L
KIAA0368
ADNP
PIP5K1C
FRAT2
SIRT4
COMMD3
ZFPM2
KCNH4
RHOQ
CELA3B
ABCA6
ICMT
TRAM1
QPRT
BRD4
SEC61G
CES3
SKIV2L2
SRRM2
MMD
LILRA4
TSPAN12
GTPBP4
CCNDBP1
BACE1
CBLC
SSBP2
ARFIP2
SLC7A11
TMEM2
STX12
CADM1
GSPT2
KIF4A
CBY1
RASGRP3
SLC39A6
POM121L1P
POU2F3
ARMC8
MPC2
TRIM58
CCDC28A
FAM98A
TIPARP
TSKU
TKFC
SUSD5
RAI14
RTL8A
ZBTB20
OR1A2
PITPNC1
ARL5A
PHGDH
FBXL6
FBXO24
SLC13A4
FBXO5
FBXO3
TINF2
SACS
GNL3
PPP1R14B
SLC17A5
TIMM10
IL36RN
OR10H2
OR10H1
RGS17
PCOLCE2
OR2W1
RPS6KC1
SNORA70
CHORDC1
SEC22A
RNF11
DNAJC2
NPTN
TRMT2A
LAMP3
TSPAN13
TRAPPC3
INPP5J
HSPB7
TUBGCP4
SERP1
NMRK2
COQ2
SESN1
LSM1
LSM3
TP53TG5
RAB30
TNRC6A
RPS6KA6
MAT2B
MRPS28
OSTM1
SLC27A6
SLC6A16
AAMDC
MRPS18B
TMPRSS11E
RGCC
DBNL
TMEM230
WDR91
C1GALT1C1
MRPL18
BABAM1
MRPL22
LGALSL
CNIH4
TMEM208
N6AMT1
C6orf15
TAGLN3
DDX25
BLNK
TFPT
NRBP1
PSAT1
DONSON
LMCD1
TLX3
PIK3R4
TAX1BP3
STOML2
WRAP73
NOX3
DEC1
UBQLN3
MYEF2
TAS2R9
TAS2R13
TAS2R10
PDE11A
SLC35B3
TPRKB
MED31
AMDHD2
FAHD2A
RRP15
WASHC3
MRPS16
GLRX2
GMNN
NMD3
DERA
CRYL1
METTL9
LACTB2
TRIM17
CEP83
DCTN4
CYB5R4
HSD17B11
HSD17B14
TUBD1
TCEAL9
ELOA2
COPZ2
GLTP
CRIM1
CEND1
COA4
RXFP3
NRN1
FAM198B
ARL17A
CHST15
POMP
NIP7
WDR83OS
SUCO
SCARA3
PCYOX1
RHCG
SFMBT1
SPOUT1
RTCB
NELFCD
UFC1
DTL
VPS54
PEX5L
MBIP
FAM49B
TAF9B
DYNC2LI1
LUC7L2
PTRH2
CHMP3
MPC1
HECA
RAB23
ERAP1
INPP5K
STK26
GALNT7
LRP1B
IL20RA
CSNK1G1
CPSF2
PCBP3
RIPK4
GDAP1
SSH1
GFOD1
ATAD2B
CCSER2
RNF216
PUS7
NDUFB11
DDIT4
MTMR12
SCAND2P
PAF1
MANSC1
OTUD4
MPHOSPH8
ALKBH4
BORCS6
KCTD9
BNC2
DCHS2
KLHL24
CNNM2
ERCC6L
ASPN
VPS13C
SIDT1
CNTLN
DCAF16
NCAPG2
ELOVL2
FAM208B
CMTM6
RASIP1
ODAM
TMEM132A
NMRK1
MARCH2
TMCO3
FAM118A
MCUB
MARCH1
LINC00483
FKBP14
PTCD3
ENOX1
TMEM248
MED9
DMAC2
GPATCH2
SLFN12
WDR60
TRIM68
LRRC8D
ARMC1
SEC61A2
DCUN1D2
DPPA4
RCBTB1
CCDC25
TMEM206
ADI1
TMEM19
IMP3
FGGY
RBM41
UFSP2
AGPAT5
SLC35C1
PIDD1
GPALPP1
STRADB
CSGALNACT2
CHST12
TRPV6
NOP10
BATF3
SMPD3
TRIM36
SLC30A10
IL17RB
ENOSF1
NAGK
ZCCHC8
DDX60
TASP1
DOCK10
ZDHHC7
LRRC40
DEPDC1
PPP4R3A
KANSL3
MREG
LUC7L
ASF1B
DNAJC11
TMEM30A
ZNF839
MCTP2
MINDY1
METTL2B
DCP1A
ADAP2
EMC3
EAF2
PLGRKT
TEX2
TMEM165
ERBIN
FAM212B
ALG1
PCDHB8
PCDHA11
PCDHA6
PCDHA4
CRTAM
TMX4
IRGC
GKN1
DNAJC12
CHST7
OR2S2
C11orf16
TM9SF3
MDM1
AGPAT3
THAP10
PAK6
ARNTL2
CMC2
EMSY
PARP6
SDHAF3
COQ9
RSRP1
RARS2
SLC17A6
RPGRIP1
ANO2
TIGAR
PDSS2
TRPC7
EPPIN
CD248
ADGRG6
VANGL2
PBXIP1
SPC25
NLGN4X
ZNF608
ALPK3
KLHL42
FAM135A
JCAD
EP400
ZSWIM6
ANKRD36B
POLD4
CCDC181
RAP2C
CYP4F11
ZNF410
JAM2
KMT2C
IL22RA1
HIVEP3
ACE2
PRDM13
AFAP1
GPBP1L1
FAM3A
TRMT11
NYX
DHX35
VIPAS39
DUSP21
BLOC1S5
GALNT11
MCUR1
PBLD
IFIH1
ABCG4
ERAP2
TFB2M
NOC3L
GREM2
TMEM168
GPR135
ANAPC1
NUCKS1
ACBD3
MEAF6
FNDC3B
CERK
CEP85
NABP1
RFX7
BCL11B
CASD1
MRPS15
VPS33A
UPF3B
RSRC2
WNK1
C8orf33
KCTD14
MRPS34
CRELD1
PRR14
C17orf53
METRN
GID4
PDCL3
TSEN34
SECISBP2
PRRG3
METTL16
KDELC1
DSCC1
DCTPP1
SLC25A23
TRAPPC6A
CARD14
C9orf16
MAPKAP1
APOO
DERL1
FKRP
DHRS11
DCAF10
HMGN5
KREMEN2
LRFN3
WDR25
CHPF
CARS2
ARMC7
ROGDI
CHMP6
PANK3
AKIRIN1
USB1
HECTD3
RTL10
ZMAT4
IGFLR1
NARS2
ADGB
ISOC2
GRTP1
SUGCT
CATSPERB
CAMKMT
NAA40
ZNF669
TCTN2
CPSF7
CBLL1
PODNL1
CAAP1
LPCAT1
MCMBP
ZNF672
PRR5L
CYBRD1
TMC7
ACTR5
MAGIX
MRM1
ADM2
ZNF696
PAQR6
WLS
GRHL2
GREB1L
TRAPPC13
TMEM156
RMI1
TMEM62
LRRTM4
CCDC15
LRRC8E
THOC7
TTI2
TMEM254
FBXO11
RAB11FIP1
SLC35F5
C16orf70
KLHL15
PNPLA3
COASY
TSGA10
PRR7
KHDC1
STARD5
ASXL3
KDM7A
GPR63
DCSTAMP
ITFG1
YIPF5
LMAN2L
GFOD2
LBH
CAB39L
CCNL2
ADAMTS12
VANGL1
SLC25A28
ADPGK
EMC6
FAM107B
GRWD1
RBM48
GTF2IRD2
ZDHHC18
GINS4
MIEN1
MCM8
ZNF347
MFSD9
IL17RC
ANKRD36BP1
ADGRG7
ZBTB45
ARHGEF39
FAM136A
TNS4
MIR22HG
KIAA1644
TNKS1BP1
SSH2
RRP36
HPS4
KIR3DX1
ZNF551
THAP3
ZNF468
GADD45GIP1
TIMM29
ACBD5
RSAD2
PLXNA4
NEK9
CHMP7
MYOZ3
MTDH
TEX30
HAUS8
ACTR8
ERI2
TUBGCP5
C1QTNF1
MARCH3
WDR92
NUS1
ARAP2
SSX2IP
TRIM6
PAQR4
SLC38A10
KRT222
EID2B
TNFAIP8L1
MFSD12
C1orf216
FAM168B
AP1S3
UBR3
MTERF4
[truncated: 831 more rows]
