# Supplementary material for: Ikaros Regulates microRNA Networks in Acute Lymphoblastic Leukemia
Source: Preprints.org preprint supplement (doi:10.20944/preprints202208.0323.v1), 2022-08-17
Supplement: Supplementary file 11 [file TableS7.xlsx]

## Sheet: Table S7
Table S7: IK1 downregulated miRNA targets that annotate as tumor suppressor genes and IK1 upregulated miRNA targets that annotate oncogenes
miR_down_TSG	miR_up_oncogenes
ACY1	KRAS
ADARB1	HRAS
ADPRH	ABL1
AGTR1	AKT1
AHR	KLF4
ANXA1	RUNX1
FAS	YES1
ARF1	SKI
ASCL1	NSD1
ATF3	SRSF2
BMP2	CCND1
BMPR1A	RAF1
BMPR2	PIM1
BRCA1	MYB
CASP8	MDM2
CAV1	MAF
CD44	JUN
CDH1	LETMD1
CDH5	FUS
CDK2	FOS
CDK6	CTNNB1
CDKN1A	PIM2
CDX2	SETDB1
CHD1	ENTPD5
CREBBP	ELL
CREM	WNT3
CSNK1A1	TPR
CTGF	STAT3
DAB2	STIL
DDB2	SET
GADD45A	RARA
DDX3X	RAB22A
DFNA5	CBX8
DNMT3A	SALL4
DSP	HES6
DUSP1	PLAGL2
E2F2	PDGFB
ECT2	ZBTB7A
EEF1A1	PAX2
EPHA2	OLR1
EMP2	MLLT1
EXT2	MACC1
EZH2	XIAP
GPC5	HMGA1
FH	GNAI2
FOXO1	GLO1
FOXO3	FGFR1
FXN	CTTN
GALR1	EEF1A2
GATA4	VAV3
GRIN2A	CDKN1A
GSK3B	CDK6
GSTP1	CDK1
HSPD1	SERTAD2
IFI16	CCNB1
IGF1	SQSTM1
IGF2R	RUNX3
IGFBP4	BCL2L12
ING2	NCOA3
IRF4	CXCR4
CD82	YWHAZ
LSAMP	TRAF6
MAT2A	THRA
MCC	TGFB1
MME	TAF1
MT1M	SOX4
MXI1	SNCG
NF1	SRSF6
NFKB1	BCL2L1
NOTCH2	SLC12A5
NUP98	PTCH1
PDGFRL	BAIAP2L1
SERPINB5	PLK1
SERPINI2	CDK14
PLK1	PLAC8
PPARA	PBX2
PPP2CA	YBX1
PPP2CB	MSI1
PRKAA1	MDM4
PRKCB	MCL1
PRKCD	JUND
HTRA1	JUNB
PTEN	IGF1R
PTPN1	GPR132
PTPN11	BCL9L
PTPRJ	GATA6
RAD51C	EN2
RAP1A	GPAT4
RB1	TRIM28
KDM5A
RBM4
RPA1
RPL10
S100A2
SAFB
SDHB
MAP2K4
SFRP4
SKIL
SOD2
SPTBN1
ST13
STAT3
STAT5A
STK11
SYK
TAGLN
TCF4
TCF3
TGFBI
TGFBR3
THBS1
TIMP3
TNFAIP3
TP53
NR2C2
PHLDA2
VIM
WNT5A
XRCC5
BTG2
NR4A3
ARID1A
SRPX
NR0B2
MADD
RNASET2
SOCS1
EED
TNFSF9
TNFRSF10B
WISP3
IER3
SELENBP1
GPRC5A
DNAJA3
LATS1
ABCG2
RASAL2
EEF1E1
EI24
RNF144A
SH2B3
ABI2
PLXNC1
TRIM13
SPRY2
STUB1
IKZF1
YAP1
RBM14
ZBTB18
MYBBP1A
LEFTY1
NPRL2
IQGAP2
FRS3
CYB561D2
DNAJB4
CHEK2
PARK7
GABARAP
IKZF3
IKZF2
PHLPP2
KIF1B
EPB41L3
DICER1
SIRT4
CBX5
SUZ12
GTPBP4
CCNDBP1
PHLDA3
SSBP2
TMEFF2
CADM1
POU2F3
LHX6
TSPAN13
HSPB7
PDCD4
RPS6KA6
BLNK
NRBP1
PLEKHO1
TNFRSF12A
HECA
LRP1B
IL17RD
RNF111
FBXW7
VEZT
DNAJC11
CACNA2D3
EAF2
GKN1
DIABLO
DUSP22
PDSS2
SCYL1
MTUS1
WDR48
KMT2C
HIVEP3
ANAPC1
PHACTR4
NRSN2
ING5
GADD45GIP1
RASL10B
CABLES1
TP53INP1
LRIG3
PACRG
TOM1L2
TMPRSS6
ADAMTS18
UNC5B
